# Supplementary material
Source: PubMed Central journal article supplement (PMC2768667)
Supplement: NIHMS121226-supplement-01.pdf [file NIHMS121226-supplement-01.pdf]

## Supplemental Data

### A Genome-wide RNAi Screen

#### Identifies Multiple Synthetic Lethal

#### Interactions with the Ras Oncogene

Ji Luo, Michael J. Emanuele, Danan Li, Chad J. Creighton, Michael R. Schlabach, Thomas F. Westbrook, Kwok-kin Wong, and Stephen J. Elledge

#### SUPPLEMENTAL EXPERIMENTAL PROCEDURES

##### **shRNA library screen and microarray hybridization**

The pool-based shRNA screen using half-hairpin (HH) barcode deconvolution was carried out as described before (Schlabach et al., 2008). Briefly, DLD-1 Ras mutant (Mut) or wildtype (WT) cells were infected with pools of retroviral shRNA at a representation of ~1,000 and a multiplicity of infection (MOI) of ~1. At day 3 post infection an initial, population-doubling 0 (PD0) sample was taken. The rest of the population were selected with puromycin to remove the minority of uninfected cells and propagated in culture for an additional 17 doublings before the final, PD17 sample was taken. For each passage a minimal representation of 1000 was maintained. Our genomic shRNA library containing 74,905 retroviral shRNAs targeting 32,293 unique human gene transcripts (including 19,542 RefSeqs) were screened as 6 pools of ~13,000 shRNAs per pool in independent triplicates. For each pair of corresponding PD0 and PD17 samples, shRNA HH barcode was PCR-recovered from genomic samples and labeled with Cy5 and Cy3 dyes, respectively. The labeled HH barcode amplicons were competitively hybridized to a microarray containing the corresponding probes. Custom microarrays with HH barcode probe sequences were from Roche Nimblegen. Array hybridization and scanning protocols were based on manufacturer's instructions. The genome-wide mir30 shRNA library was expressed using the retroviral vector MSCV-PM (Schlabach et al., 2008) and is available through Open Biosystems Inc.

##### **Statistical and bioinformatics analysis of shRNA screen**

Only informative probes (i.e. those with raw signal 2-fold above negative control probes) were used for analysis. The change in the relative abundance of each shRNA in the library over time is measured using the normalized Cy3/Cy5 ratio of its probe signal (Schlabach et al., 2008). A log<sub>2</sub> Cy3/Cy5 ratio of < 0 indicates the shRNA is depleted in the population over time. To identify shRNAs that are synthetically lethal with mutant Ras, the mean log<sub>2</sub> Cy3/Cy5 ratios of the Ras Mut triplicates were compared to that of the Ras WT triplicates to derive the log<sub>2</sub> ratio difference. A *p*-value of the difference between the two triplicates was calculated using the t-test. A extended list of candidate shRNAs (**Table S1**) were obtained by using a set of cutoff that requires the Ras Mut log<sub>2</sub>

ratio  $\leq -0.7$ , Ras WT log ratio  $\geq -2$ , the difference in log<sub>2</sub> ratios between Ras Mut and Ras WT to be  $\leq -0.7$ , and the *p*-value to be  $\leq 0.3$ . By reducing the *p*-value to  $\leq 0.1$  a shorter candidate list is obtained (**Table S2**). As the overall validation rate is relatively low (26.7%), we use the statistical analysis mainly as a guide to prioritize candidates for further test and validation. Functional categorization of candidate RSL genes was done using PANTHER (Thomas et al., 2003).

### **Analysis of human lung tumor profiles**

A gene signature of *KRAS* mutant versus *KRAS* wild-type tumors was defined, using a published dataset of 84 lung adenocarcinomas from a study by Bhattacharjee *et al.* (Bhattacharjee et al., 2001) for which the *KRAS* mutation status of each tumor was known (genes with  $P < 0.01$ , two-sided *t*-test were selected). This *KRAS* signature was validated by both gene signature similarity scores and by gene set enrichment analysis using two independent cohorts of lung cancer where the *KRAS* mutation status was known for the tumors (Ding et al., 2008; Beer et al., 2002), (**Figure S8**). This *KRAS* gene signature was then applied to analyze a gene expression profile dataset of 442 human lung adenocarcinomas by Shedden *et al.* (Shedden et al., 2008). Each tumor was scored for manifestation of the Ras pathway by the following. The Shedden tumor profiles were generated among four laboratories, and so within each laboratory subset, expression values for each gene were normalized to standard deviations from the mean. Within each Shedden tumor profile, the average of the genes high (“up”) in the Bhattacharjee *KRAS* signature were compared with the average of the genes low (“down”) in the signature: tumors with higher expression of the “up” genes as compared to the “down” genes ( $P < 0.01$ , *t*-test) were classified as showing Ras pathway manifestation (“Ras signature+”); tumors with higher expression of the “down” genes ( $P < 0.01$ ) were classified as not showing Ras pathway manifestation (“Ras signature-”); tumors that were intermediate between the above two groups were not used in subsequent analyses. Within the Shedden “Ras signature+” tumors (N=143), tumors with expression levels greater than the median for the given candidate RSL gene were compared with the rest of the tumors in the subset, using Kaplan-Meier analysis for time to patient death. In addition, univariate Cox analysis evaluated the expression of the given gene as a continuous variable for correlation with outcome. The same Kaplan-Meier and Cox analyses were also carried out using the Shedden “Ras signature-” tumors (N=116). To correct for multiple hypothesis testing, we carried out simulation tests to estimate the probability of obtaining 3 out of 24 APC/C and COPS9 signalosome associated genes that both had a *p*-value of  $< 0.05$  and whose relative expression levels changed in the predicted direction in *KRAS* mutant tumors. Based on these criteria, the expected number of chance significant hits was 0.57 genes (based on 1000 simulations, where both survival *p*-value and direction of change was randomly generated for each of the 24 genes), and the probability of getting 3 or more genes due to multiple testing was  $p = 0.02$ .

### **The multi-color competition (MCA) assay**

The competition assay used to test candidate genes from the screen was modified from a previous protocol (Torrance et al., 2001; Smogorzewska et al., 2007) and was carried out in 96-well plates in independent triplicates. For this assay, 1,000 each of GFP-labeled Ras

Mut and unlabeled Ras WT cells were seeded in each well. For retroviral shRNA infection, cells were infected at an MOI of 1–5, selected for 3 days with puromycin and propagated for an additional 4–5 days before analyzed by FACS. An shRNA targeting firefly luciferase (shRNA-FF) was used as the negative control. For siRNA transfection, cells were transfected with siGenome siRNAs (Dharmacon) using Lipofectamine RNAiMAX (Invitrogen) and analyzed by FACS 5–6 days post transfection. An siRNA targeting luciferase (Luc) was used as the negative control. For drug treatment, cells were treated with drugs for 4-5 days prior to FACS analysis. Untreated wells were used as negative controls. To obtain normalized fitness of Ras Mut cells that can be compared across experiments, the percentage of Ras Mut cells in each sample was normalized to that in the control samples of that experiment. This results in a “normalized mutant fitness” that range from 0% (no Ras mut cells left in population) to 100% (same number of Ras mut cells as control wells). These results have been verified using cell viability assays employing Cell TiterGlo (Promega)

### **Cell cycle analysis**

For cell cycle analysis, cells were ethanol fixed and stained with PI and analyzed using a BD LSR II FACS analyzer (BD Bioscience). Data analysis was carried out with BD FACS Diva and FlowJo softwares. Cell cycle synchronization by double thymidine block was based on a previous protocol (Stegmaier et al., 2007). Briefly, cells were arrested with two rounds of 20-hour thymidine (2.5mM) treatment approximately 12 hours apart and released into mitosis. To trap cells at different stages of mitosis, cells release from double thymidine block were released into the CDK1 inhibitor RO-3306 (10 $\mu$ M) (Vassilev et al., 2006), the PLK1 inhibitor BI-2536 (100nM) (Stegmaier et al., 2007) and the microtubule depolymerizer nocodazole (100ng/ml). For one-step arrest in G2/M or in prometaphase, cells were treated overnight with either RO-3306 (10 $\mu$ M) or the Eg5 kinesin inhibitor monastrol (100 $\mu$ M), respectively. For mitotic entry experiments, cells were synchronized in RO-3306 (10 $\mu$ M) overnight prior to release. For mitotic release experiments, cells were released from overnight synchronization in RO-3306 (10 $\mu$ M) into nocodazole (200ug/ml) for 4 hours and mitotic cells were collected by mitotic shake-off. Cells were then release by washing out the nocodazole. For the analysis of lagging chromosomes and mitotic index by microscopy, cells seeded onto coverslips were arrested in mitosis with 100 $\mu$ M monastrol for 16 hours. Cells were washed and released into fresh media and were fixed at ten minute intervals for two hours in PHEM buffer + 2% formaldehyde + 0.5% triton-X100. Cells were immunostained with DAPI to visualized DNA and antibodies to phospho-histone H3 Ser10 (pH3S10) and to  $\gamma$ -tubulin to identify mitotic cells at different stages. Independent triplicates with >100 cells per replicate were analyzed. For measuring mitotic index by FACS, cells were trypsinized, fixed with ethanol and stained with PI and pH3S10 antibody.

### **Cell culture, molecular biology and reagents**

Sequence information for additional shRNAs and siRNAs used the validation is in **Table S4**. The DLD-1 and HCT116 isogenic cells were kind gifts from Dr. Bert Vogelstein (Johns Hopkins University School of Medicine) and were maintained in McCoy's 5A media supplemented with 10% FBS and antibiotics. Non-small cell lung cancer cell lines (H23, H358, H647, H1299, H1734, H2030, H2122, H460, H522, H838, H1437, H1650,

H1838 and H1975) were maintained in RPMI-1640 media with 10% FBS and antibiotics. For proliferation assays, cells were seeded in either 24-well or 96-well plates and cell number was measured using CellTiterGLO (Promega). For adherent colony assays, 1000 cells were seeded in each well of a 6-well plate and colonies were counted 10 days later by Coomassie staining. For anchorage independent colony assays, 1000 cells were seeded in each well of a 6-well plate in media containing 0.35% low-melting point agarose and colonies were counted 3 weeks later by crystal violet staining. The PCR primers use to amplify HH barcodes from genomic DNA samples are JH353F 5'-tagtgaagccacagatgta-3' and HHR2L 5'-atgtatcaaagatatagcaaggtattcag-3'. BI-2536 was a kind gift from Dr. Nathanael Gray (Harvard Medical School and Dana Faber Cancer Institute). Paclitaxel, nocodazole, MG132 and monastrol were from Sigma-Aldrich. RO-3306 was from EMD Calbiochem. Bortezomib was from LC Laboratories. Rabbit antibody against phospho-PLK1 T210 was from Abcam. Rabbit phosphoH3-S10 antibody was from Covance. Mouse antibodies against PLK1, K-Ras and tubulin were from Santa Cruz Biotechnologies. Rabbit anti-COPS4 antibody was from Bethyl Laboratories. Rabbit anti-APC1 and APC4 antibodies were from Novus. mRNA levels were measured by RT-qPCR using CYBR green (Invitrogen). The following primer pairs were used for RT-qPCR analysis: KNL-1/CASC5, 5'-tacagaaaccccgacagagc-3' and 5'-tcttctggagtaggtggtgtgtt-3'; borealin/CDCA8, 5'-gctgacagcaaagagatcttcc-3' and 5'-gccaataatcgaggctct-3'; hMis18a/C21ORF45 5'-ggaatcttctctgaaaactaatcca-3' and 5'-ttctgacagatcattctgaccaa-3'.

### **Mouse xenograft tumor models**

DLD-1 cells (5 million cells per site) or HCT116 cells (2 million cells per site) in suspension were mixed with equal volume of matrigel (BD bioscience) and injected subcutaneously into both flanks of 6 week-old female nude mice (Charles River laboratory). Drug treatment began after one week of cell injection. BI-2536 was given by i.v. under a twice per week schedule. The dose of BI-2536 used for DLD-1 xenografts was 50 mg/kg for the first 2 weeks and then increased to 75 mg/kg for the last week. The dose of BI-2536 used for HCT116 xenografts was 50 mg/kg. Measurement of tumor size was performed twice a week, and tumor volume was estimated using the formula: volume = Length x Width<sup>2</sup> x 0.5. The volume of each tumor at serial time points was normalized with the initial tumor volume and comparison of tumor volumes between the drug treatment group and vehicle control group was carried out using 2-way ANOVA with Bonferroni post-tests.

## SUPPLEMENTAL FIGURES WITH LEGENDS

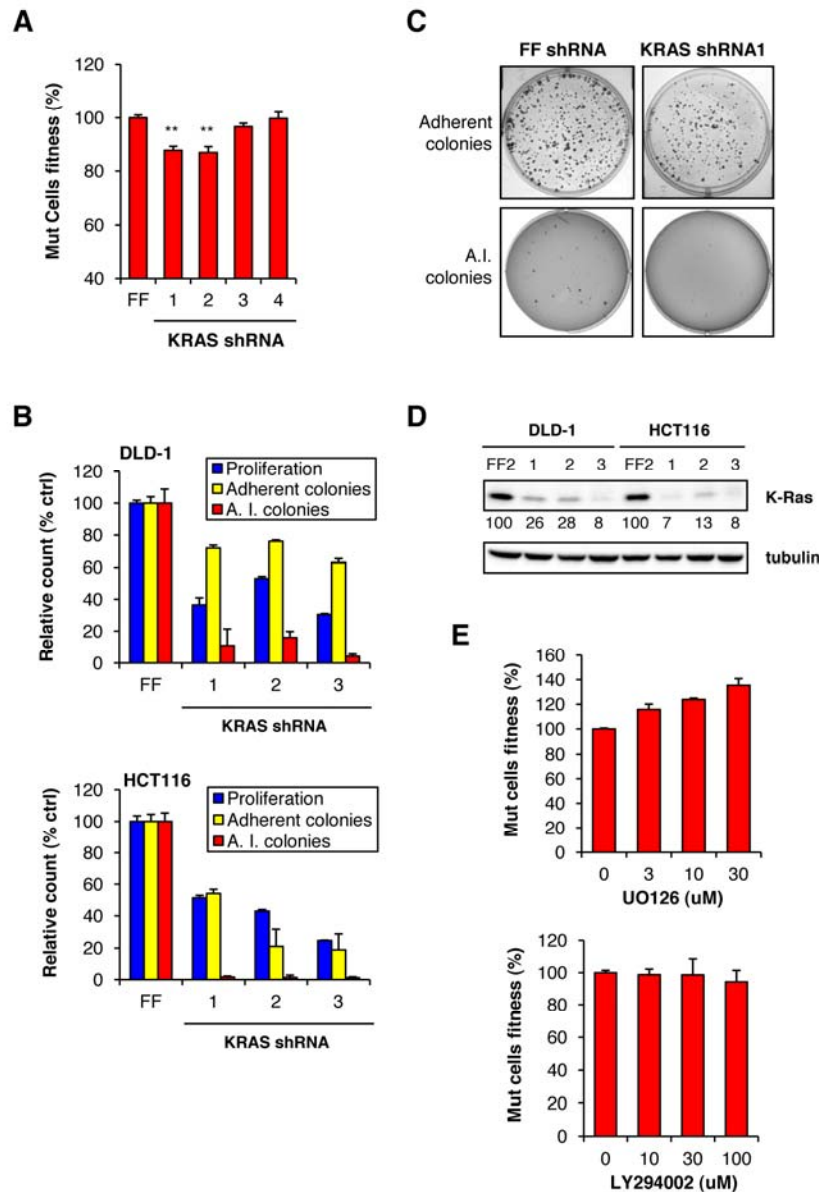

**Figure S1. Effect of K-Ras depletion in DLD-1 and HCT116 cells.**

- A. DLD-1 Ras Mut cell fitness is modestly decreased by K-Ras shRNAs as measured by the competition assay (\*\* $p < 0.01$  compared to respective FF control).
- B. Effect of K-Ras shRNAs on cell proliferation, colony formation on adherent surface and colony formation in soft agarose in DLD-1 and HCT116 Ras Mut cells. For the proliferation assay, equal number of cells stably expressing either K-Ras shRNAs or a control firefly luciferase (FF) shRNA were seeded at normal density and cell numbers were estimated 4 days later using CellTiter-GLO assay. For adherent colony

formation, cells were seeded at low density on an adherent surface and colonies were counted 10 days later. For anchorage independent colony formation, cells were seeded at low density in soft agarose media and colonies were counted 3 week later ( $p < 0.01$  for all shRNAs compares to respective FF control).

- C. Representative images of the colony assays in B for K-Ras shRNA1 in DLD-1 cells.
- D. K-Ras protein knockdown in cell lines stably expressing K-Ras shRNAs were verified by Western blotting. Numbers under the blot indicate normalized levels of K-Ras proteins after adjusting for loading.
- E. Effect of the MEK inhibitor U0126 and the PI3K inhibitor LY294002 on the fitness of DLD-1 Ras Mut cells in the competition assay. The assay was carried out for 5 days in the presence of various drug concentrations as indicated.

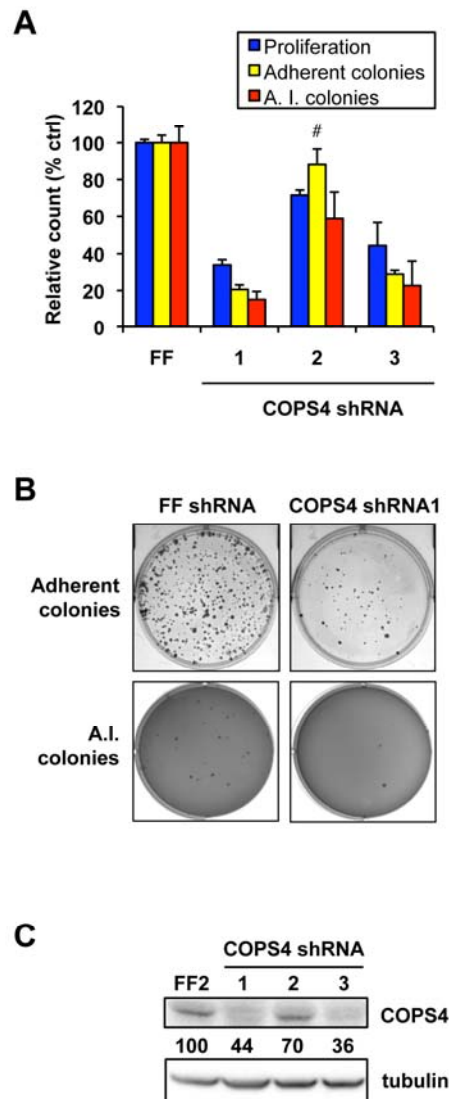

**Figure S2. Depletion of COPS4 impairs DLD-1 Ras Mut cell viability.**

- A. Effect of COPS4 shRNAs on cell proliferation, colony formation on adherent surface and colony formation in soft agarose in DLD-1 Ras Mut cells ( $p < 0.05$  for all shRNAs compares to respective FF control, except # not significant).
- B. Representative images of the colony assays in B for K-Ras shRNA1 in DLD-1 cells.
- C. Knockdown efficiency of COPS4 shRNAs in DLD-1 cells.

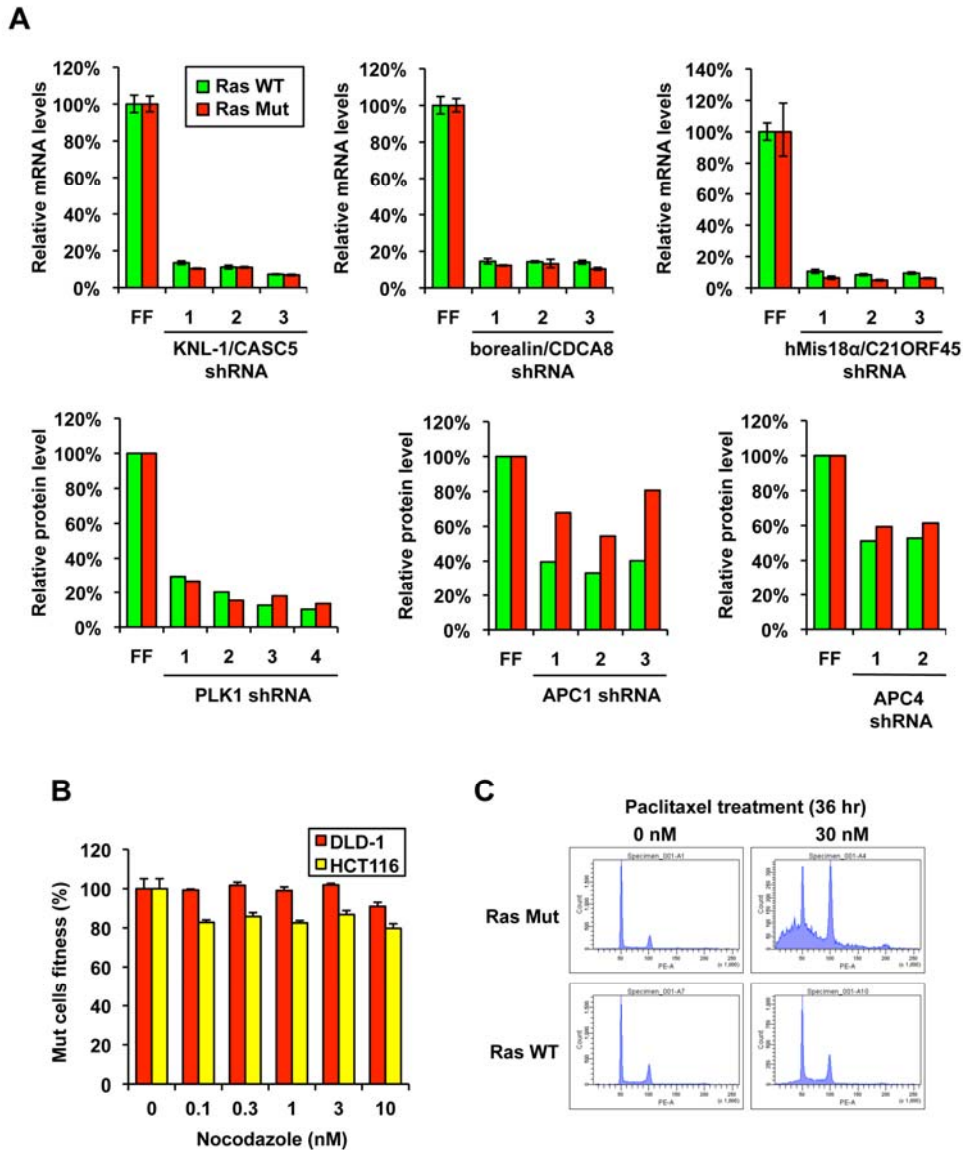



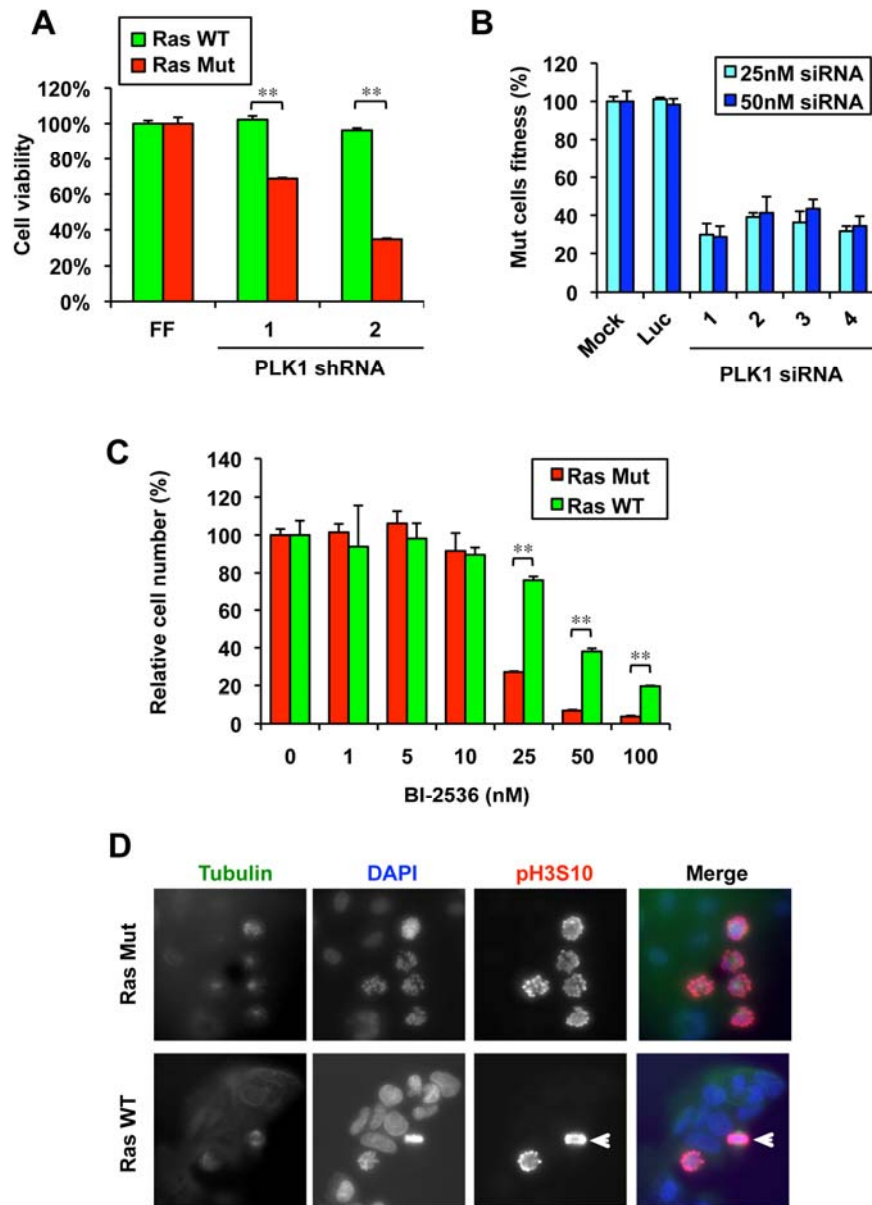

Figure S4. (A-D)

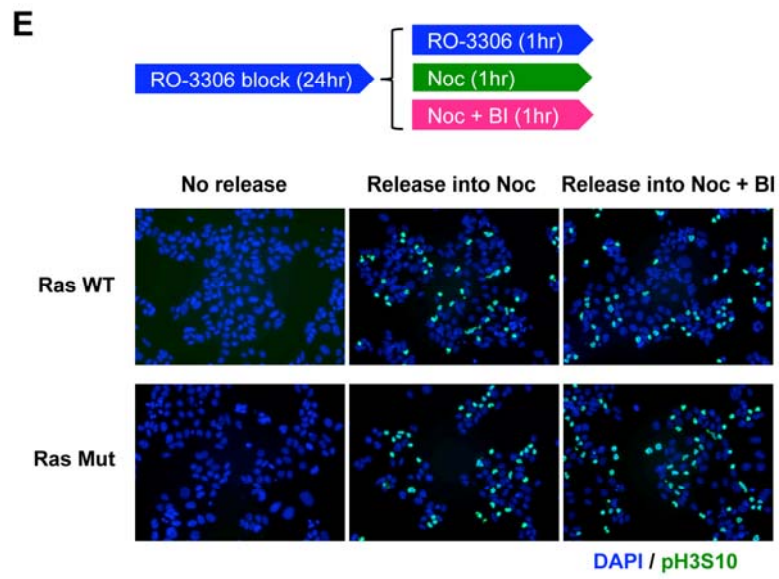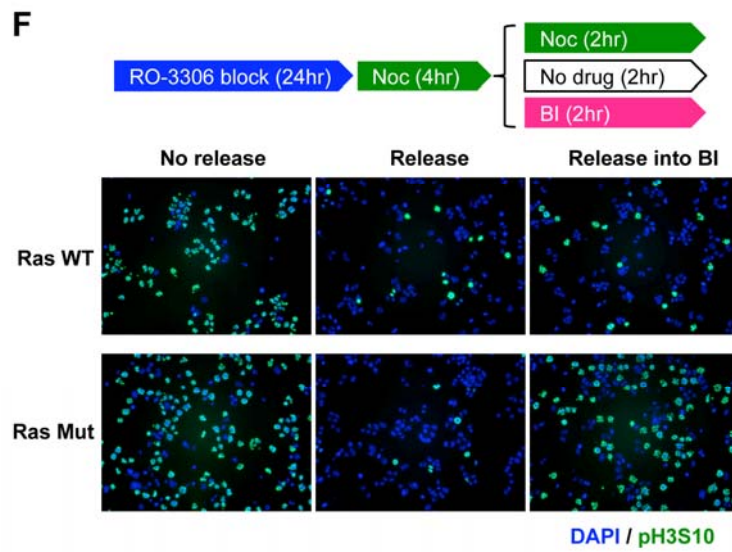

**Figure S4. (E,F)**

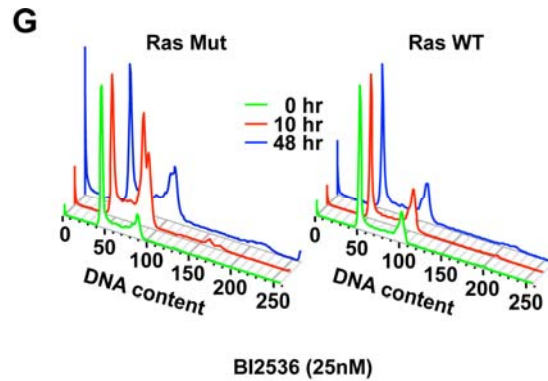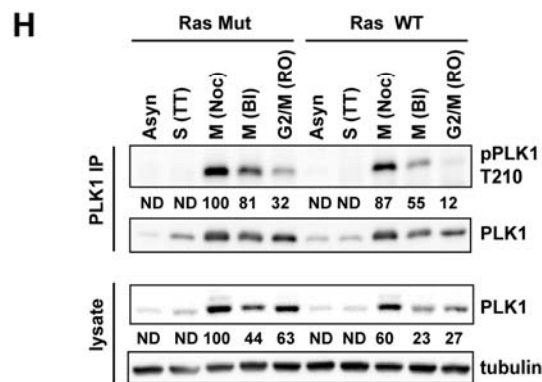

**Figure S4.(G,H)**

**Figure S4. Hypersensitivity of Ras Mut cells to PLK1 inhibition.**

- A. PLK1 depletion shows enhanced toxicity in DLD-1 Ras Mut cells as measured by CellTiter GLO cell viability assay (\*\*  $p < 0.01$ ). Ras Mut and WT cells were infected with PLK1 shRNAs at MOI ~ 1 and cell viability was measured 5 days post infection.
- B. PLK1 depletion by siRNA leads to enhanced toxicity in DLD-1 Ras Mut cells. Luc, negative control siRNA targeting firefly luciferase ( $p < 0.01$  for all siRNAs compared to respective Luc siRNA control).
- C. BI-2536 shows enhanced toxicity in DLD-1 Ras Mut cells as measured by the CellTiter GLO cell viability assay (\*\*  $p < 0.01$ ).

- D. Representative image of DLD-1 cells treated with 50 nM BI-2536 for 24 hours. Mitotic cells at various stages were identified based on phospho-H3 Ser10 (pH3S10) staining, chromosome morphology (DAPI staining) and mitotic spindle arrangement (tubulin staining). Arrowhead indicates cell with a metaphase plate on bipolar spindle. Whereas a significant number of metaphase Ras WT cells still show fully aligned chromosomes under this condition, few metaphase Ras Mut cells are found to have fully aligned chromosomes.
- E. BI-2536 does not differentially affect mitotic entry in DLD-1 Ras Mut and WT cells. Cells synchronization and release scheme is shown on top. Cells synchronized at the G2/M boundary by the CDK1 inhibitor RO-3306 were released into nocodazole (100 ng/ml) together with indicated concentrations of BI-2536 for 1 hour. The mitotic index was measured as the percentage of cells staining positive for phospho-H3 Ser10 (pH3S10).
- F. BI-2536 differentially affect mitotic progression in DLD-1 Ras Mut and WT cells. Cells synchronization and release scheme is shown on top. Mitotic cells collected by nocodazole shake-off were released into indicated concentrations of BI-2536 for 2 hours. Mitotic index was measured as the percentage of cells staining positive for phospho-H3 Ser10.
- G. Effect of BI-2536 (25 nM) on cell cycle distribution of Ras Mut and Ras WT DLD-1 cells over a 48-hour period.
- H. PLK1 protein level and activation (as assessed by T210 phosphorylation) in Ras Mut and WT DLD-1 cells. Numbers below each blot indicates normalized signal intensity after adjusted for loading. Asyn, asynchronous population; S (TT), S phase population arrested by double thymidine block; M (Noc) and M (BI), M phase population collected by releasing from double thymidine block into nocodazole (200 ng/ml) and BI-2536 (100 nM), respectively; G2/M (RO), G2/M population were collected by releasing from double thymidine block into the CDK1 inhibitor RO-3306 (10  $\mu$ M). Each inhibitor is used at concentrations that cause complete cell cycle arrest as verified by FACS.

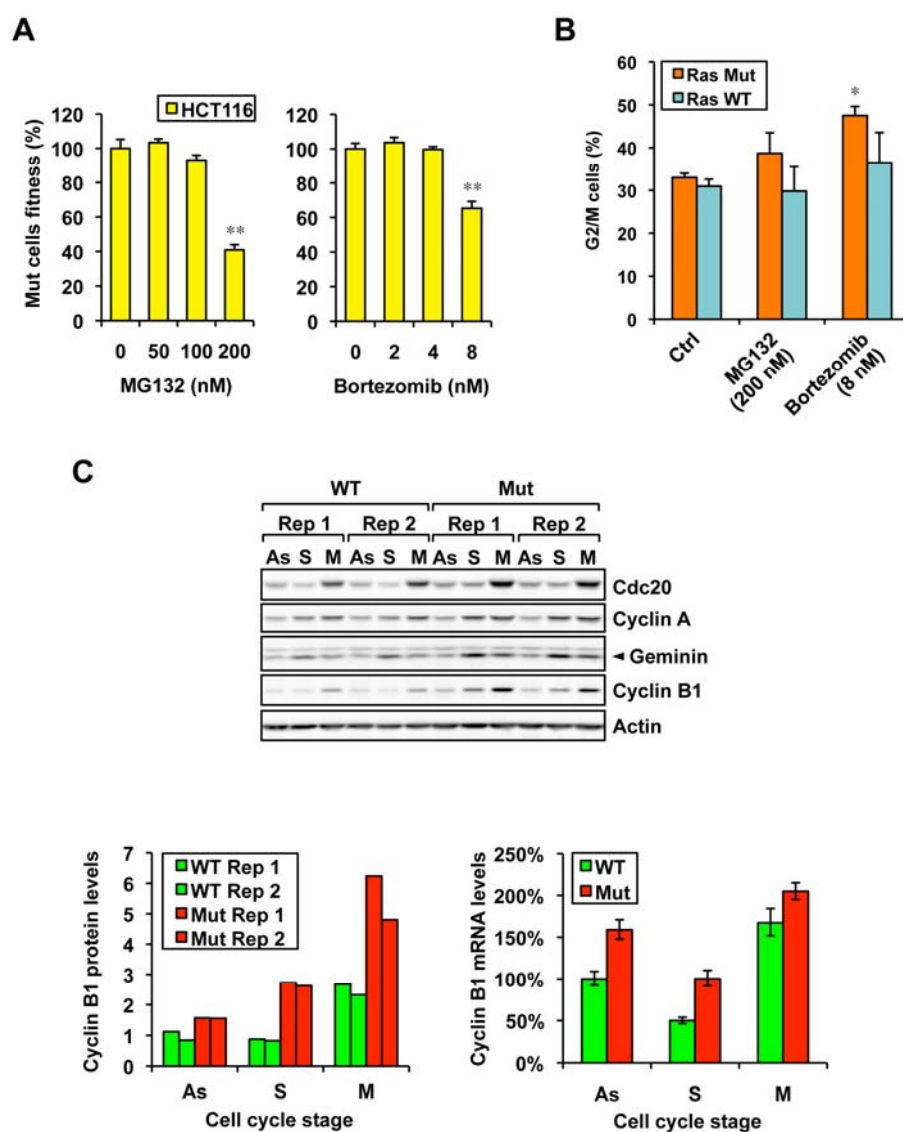

**Figure S5. Hypersensitivity of HCT116 Ras Mut cells to proteasome inhibition.**

- The proteasome inhibitors MG132 and bortezomib selectively decreased the fitness of HCT116 Ras Mut cells. The competition assay was carried out in the presence of the drug for 4 days (\*\* $p < 0.01$  compared to untreated samples).
- MG132 and bortezomib preferentially induce the accumulation of Ras Mut HCT116 cells as assessed by FACS using staining (\* $p < 0.05$  compared to untreated samples).
- DLD-1 Ras Mut cells have elevated cyclin B1 protein and mRNA levels. Ras WT and Mut cells were synchronized by double thymidine block. Asynchronous (As), S-phase cells (S, 2 hrs after release) and mitotic cells (M, 6 hrs after release) were blotted for various cell cycle proteins (2 independent replicates). Cyclin B1 protein and mRNA levels (as measured by RT-qPCR) were quantified.

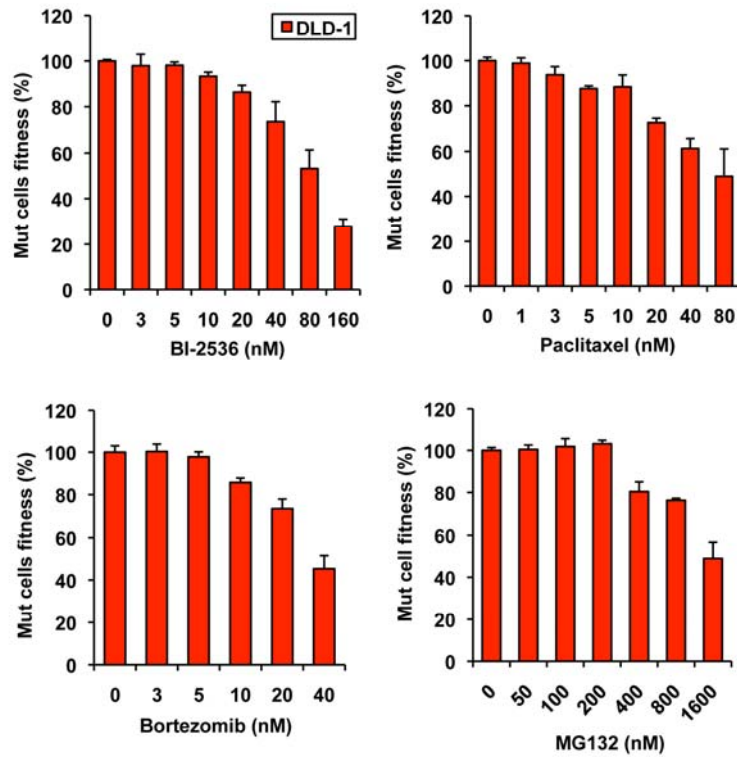

**Figure S6. Synthetic lethal effect of mitotic inhibitors when applied as a transient treatment.**

The effect of transient treatment with BI-2536, paclitaxel, bortezomib and MG132 on the fitness of DLD-1 Ras Mut cells was measured using the MCA. Cells were treated for a 24-hour period with drugs at the indicated concentrations. Drugs were then washed out and cells were allowed to proliferate for 3 additional days before FACS analysis.

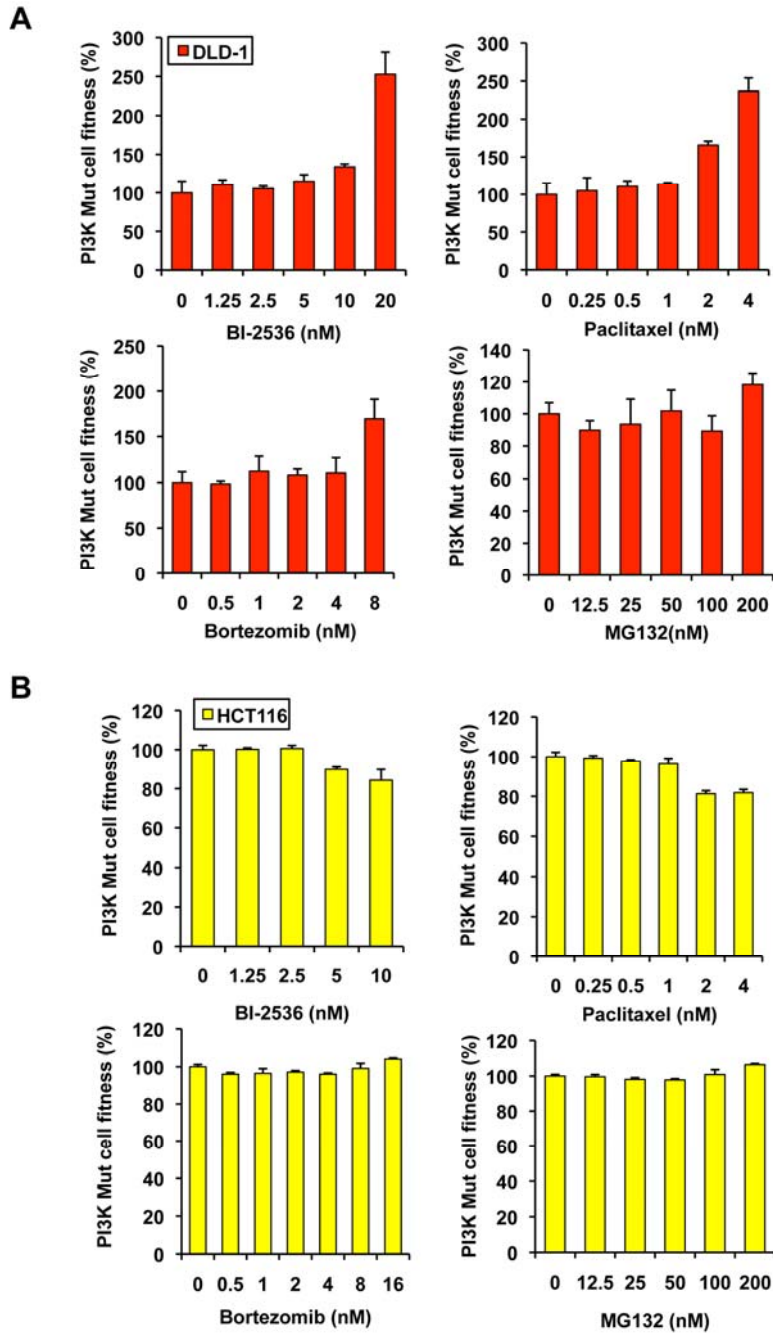

**Figure S7. Lack of synthetic lethality of various mitotic inhibitors with the PI3K oncogene.**

- A. The effect of BI-2536, paclitaxel, bortezomib and MG132 on the fitness of DLD-1 PI3K Mut cells vs. PI3K WT cells as measured by the MCA.
- B. The effect of BI-2536, paclitaxel, bortezomib and MG132 on the fitness of HCT116 PI3K Mut cells vs. PI3K WT cells as measured by the MCA.



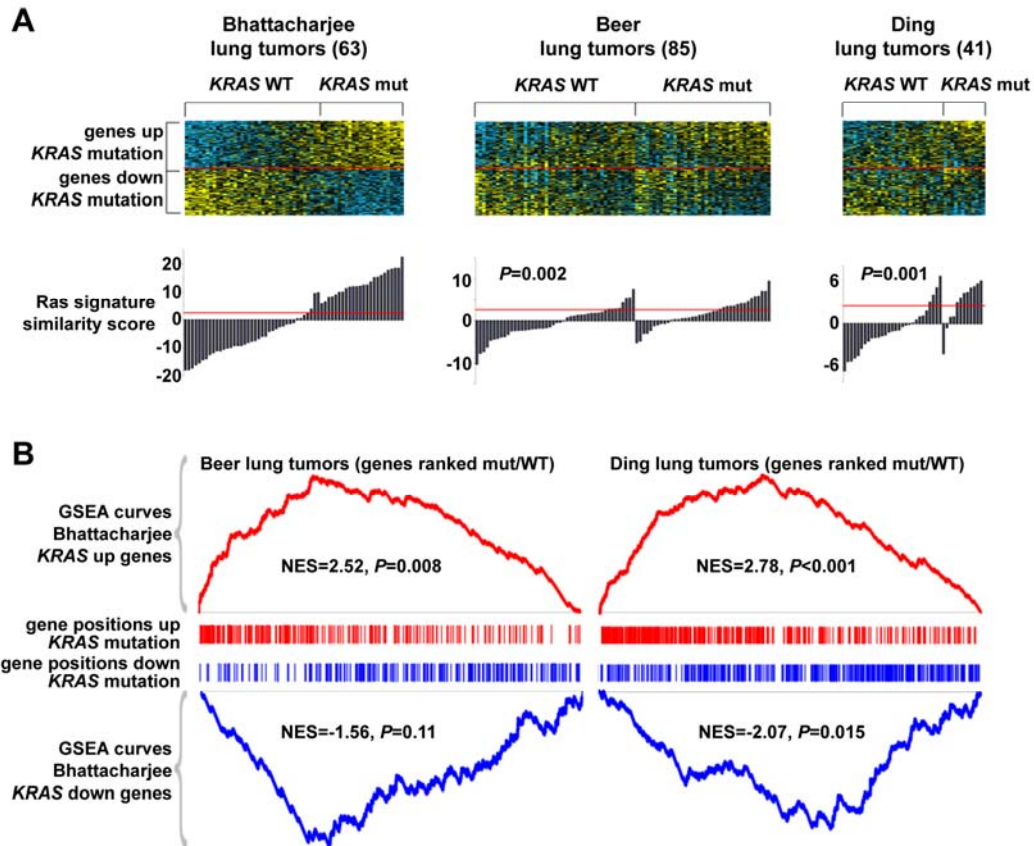

**Figure S8. The KRAS signature as defined by the Bhattacharjee dataset is consistently correlated with KRAS mutation status in multiple independent datasets.**

A. Activation scores of the KRAS mutation signature for the lung tumors in each of three datasets (Bhattacharjee *et al.*, Beer *et al.*, Ding *et al.*). Top, heat maps of the KRAS mutation signature show the expression patterns of the tumors, which are ordered (within each tumor group) from low to high similarity to the signature. Bottom, the KRAS similarity scores corresponding to the tumor expression patterns are provided below the heat maps (red line indicate  $P<0.01$  significance level of tumor-to-signature correlation by two-sided *t*-test). While the KRAS signature activation scores are not perfectly correlated with KRAS mutation status (e.g. lung tumors without KRAS mutation might still have the KRAS pathway activation via other genes), scores on average are higher for mutant versus WT tumors (as denoted by two-sided *t*-test *p*-values above the Beer and Ding plots). Importantly, only tumors that either obviously manifested or obviously did not manifest the KRAS signature (with  $P<0.01$  significance level) of the Shedden *et al.* dataset were used in the survival analyses shown in Figure 7.



B. The Bhattacharjee KRAS signature is coordinate with the Beer and Ding KRAS mutation-associated expression patterns by gene set enrichment analysis (GSEA). The entire sets of genes represented in the Beer dataset or the Ding dataset were each ranked by higher expression in KRAS mutant over WT (using the t-statistic). The gene positions of the Bhattacharjee signature were plotted along the Beer and Ding ranked lists (Red lines: genes up in Bhattacharjee signature; blue lines: genes down in Bhattacharjee signature). Positive GSEA curves indicate that the gene positions tend to be near the top of the mutant/WT ranked list; negative GSEA curves, near the bottom.

## SUPPLEMENTAL REFERENCES

Beer, D. G., Kardia, S. L., Huang, C. C., Giordano, T. J., Levin, A. M., Misek, D. E., Lin, L., Chen, G., Gharib, T. G., Thomas, D. G. et al. (2002). Gene-expression profiles predict survival of patients with lung adenocarcinoma. *Nat Med* 8, 816-824.

Bhattacharjee, A., Richards, W. G., Staunton, J., Li, C., Monti, S., Vasa, P., Ladd, C., Beheshti, J., Bueno, R., Gillette, M. et al. (2001). Classification of human lung carcinomas by mRNA expression profiling reveals distinct adenocarcinoma subclasses. *Proc Natl Acad Sci U S A* 98, 13790-13795.

Ding, L., Getz, G., Wheeler, D. A., Mardis, E. R., McLellan, M. D., Cibulskis, K., Sougnez, C., Greulich, H., Muzny, D. M., Morgan, M. B. et al. (2008). Somatic mutations affect key pathways in lung adenocarcinoma. *Nature* 455, 1069-1075.

Schlabach, M. R., Luo, J., Solimini, N. L., Hu, G., Xu, Q., Li, M. Z., Zhao, Z., Smogorzewska, A., Sowa, M. E., Ang, X. L. et al. (2008). Cancer proliferation gene discovery through functional genomics. *Science* 319, 620-624.

Shedden, K., Taylor, J. M., Enkemann, S. A., Tsao, M. S., Yeatman, T. J., Gerald, W. L., Eschrich, S., Jurisica, I., Giordano, T. J., Misek, D. E. et al. (2008). Gene expression-based survival prediction in lung adenocarcinoma: a multi-site, blinded validation study. *Nat Med* 14, 822-827.

Smogorzewska, A., Matsuoka, S., Vinciguerra, P., McDonald, E. R. r., Hurov, K. E., Luo, J., Ballif, B. A., Gygi, S. P., Hofmann, K., D'Andrea, A. D. et al. (2007). Identification of the FANCI protein, a monoubiquitinated FANCD2 paralog required for DNA repair. *Cell* 129, 289-301.

Steggmaier, M., Hoffmann, M., Baum, A., Lenart, P., Petronczki, M., Krssak, M., Gurtler, U., Garin-Chesa, P., Lieb, S., Quant, J. et al. (2007). BI 2536, a potent and selective inhibitor of polo-like kinase 1, inhibits tumor growth in vivo. *Curr Biol* 17, 316-322.

Thomas, P. D., Campbell, M. J., Kejariwal, A., Mi, H., Karlak, B., Daverman, R., Diemer, K., Muruganujan, A., and Narechania, A. (2003). PANTHER: a library of protein families and subfamilies indexed by function. *Genome Res* 13, 2129-2141.

Torrance, C. J., Agrawal, V., Vogelstein, B., and Kinzler, K. W. (2001). Use of isogenic human cancer cells for high-throughput screening and drug discovery. *Nat Biotechnol* 19, 940-945.

Vassilev, L. T., Tovar, C., Chen, S., Knezevic, D., Zhao, X., Sun, H., Heimbrook, D. C., and Chen, L. (2006). Selective small-molecule inhibitor reveals critical mitotic functions of human CDK1. *Proc Natl Acad Sci U S A* 103, 10660-10665.

**Supplemental Table 1. Candidate RSL shRNAs based on relaxed statistical criteria.**

For an shRNA to qualify it must show a Mut log2 ratio <= -0.7, a WT log2 ratio >= -2.0, a Mut vs. WT log2 ratio difference of <= -0.7, and p value <= 0.3.

| Probe ID              | v2HS        | Sequence                | Accession    | Symbol   | Gene Name                                                                                                                         | Mut log2 mean | Mut log2 SD | WT log2 Mean | WT log2 SD | log2 difference | P-value |
|-----------------------|-------------|-------------------------|--------------|----------|-----------------------------------------------------------------------------------------------------------------------------------|---------------|-------------|--------------|------------|-----------------|---------|
| Hs_12plexchip_4_2878  | v2HS_220955 | TAATGAAGGGAGGATTCATGCA  | AK056852     | A2M      | alpha-2-macroglobulin (A2M), mRNA                                                                                                 | -0.70         | 0.23        | 0.01         | 0.60       | -0.70           | 0.17    |
| Hs_12plexchip_5_4881  | v2HS_255771 | ATAGACTTTCACATATGGCTGGT | NM_000014    | A2M      | alpha-2-macroglobulin (A2M), mRNA                                                                                                 | -1.15         | 0.46        | 0.73         | 0.70       | -1.88           | 0.02    |
| Hs_12plexchip_4_5526  | v2HS_17554  | TTGTATCTCAACACCGTCTGCA  | NM_144670    | A2ML1    | alpha-2-macroglobulin-like 1 (A2ML1), mRNA                                                                                        | -2.38         | 0.26        | -1.22        | 1.02       | -1.17           | 0.18    |
| Hs_12plexchip_6_6633  | v2HS_200318 | TTTAAGAAGCGAAGTGTGCCA   | NM_080282    | ABCA10   | ATP-binding cassette, sub-family A (ABC1), member 10 (ABCA10), mRNA                                                               | -0.84         | 0.11        | 0.35         | 1.02       | -1.19           | 0.18    |
| Hs_12plexchip_3_7348  | v2HS_100516 | TATATGTCTCGATTCTCAGGA   | NM_178559    | ABCB5    | ATP-binding cassette, sub-family B (MDR/TAP), member 5 (ABCB5), mRNA                                                              | -1.18         | 0.12        | 0.08         | 0.15       | -1.26           | 0.00    |
| Hs_12plexchip_6_9652  | v2HS_232838 | TAGACTTAAACCAAAGGGTCTCT | NM_016006    | ABHD5    | abhydrolase domain containing 5 (ABHD5), mRNA                                                                                     | -1.45         | 0.56        | -0.10        | 1.33       | -1.35           | 0.21    |
| Hs_12plexchip_5_8224  | v2HS_223618 | ATATGCATGTTCCACATCTGGC  | NM_016428    | ABI3     | ABI gene family, member 3 (ABI3), mRNA                                                                                            | -0.79         | 0.15        | 0.40         | 1.03       | -1.18           | 0.18    |
| Hs_12plexchip_6_9744  | v2HS_232874 | ATCTTGTAGAAGATGGTCTCGA  | NM_021962    | ABR      | active BCR-related gene (ABR), transcript variant 1, mRNA                                                                         | -0.85         | 0.33        | -0.09        | 0.61       | -0.76           | 0.15    |
| Hs_12plexchip_5_5023  | v2HS_81287  | TTAGATTATCCCTGAACAGCCT  | NM_021804    | ACE2     | angiotensin I converting enzyme (peptidyl-dipeptidase A) 2 (ACE2), mRNA                                                           | -1.29         | 0.36        | -0.40        | 0.14       | -0.89           | 0.04    |
| Hs_12plexchip_3_2132  | v2HS_53342  | ATAAAGGCACTGTTGATGTGGC  | NM_015547    | ACOT11   | acyl-CoA thioesterase 11 (ACOT11), transcript variant 1, mRNA                                                                     | -1.46         | 0.41        | -0.66        | 0.34       | -0.79           | 0.06    |
| Hs_12plexchip_3_5654  | v2HS_224084 | TTCAACTTCAGCAGGCTGCGGT  | NM_016361    | ACP6     | acid phosphatase 6, lysophosphatidic (ACP6), mRNA                                                                                 | -1.35         | 1.04        | -0.46        | 0.44       | -0.89           | 0.27    |
| Hs_12plexchip_4_4642  | v2HS_238919 | TTTATCCAGAGTATCTGCTCCA  | NM_022977    | ACSL4    | acyl-CoA synthetase long-chain family member 4 (ACSL4), transcript variant 2, mRNA                                                | -0.84         | 0.85        | 0.32         | 0.69       | -1.16           | 0.14    |
| Hs_12plexchip_2_1754  | v2HS_81153  | TTTAGGAAAGCCTGTGGTCCCA  | NM_001080454 | ACSM4    | acyl-CoA synthetase medium-chain family member 4 (ACSM4), mRNA                                                                    | -1.17         | 0.59        | -0.16        | 0.45       | -1.01           | 0.08    |
| Hs_12plexchip_2_6269  | v2HS_175818 | ATACTGAACAACTCTGACAGGC  | NM_018477    | ACTR10   | actin-related protein 10 homolog (S. cerevisiae) (ACTR10), mRNA                                                                   | -0.77         | 0.37        | 0.26         | 0.41       | -1.03           | 0.03    |
| Hs_12plexchip_5_12652 | v2HS_253909 | AAGAGAAGGGAGGTGAGTTGGT  | NM_005736    | ACTR1A   | ARP1 actin-related protein 1 homolog A, centractin alpha (yeast) (ACTR1A), mRNA                                                   | -1.34         | 0.80        | -0.61        | 0.66       | -0.74           | 0.29    |
| Hs_12plexchip_4_1459  | v2HS_199170 | TTTGTCTTTCATGATATCCGCT  | NM_001005386 | ACTR2    | ARP2 actin-related protein 2 homolog (yeast) (ACTR2), transcript variant 1, mRNA                                                  | -1.48         | 0.39        | -0.72        | 0.48       | -0.76           | 0.10    |
| Hs_12plexchip_5_6959  | v2HS_262231 | ATAGTAGACCTCCAGAAAGCA   | NM_001005386 | ACTR2    | ARP2 actin-related protein 2 homolog (yeast) (ACTR2), transcript variant 1, mRNA                                                  | -1.19         | 0.23        | -0.28        | 0.35       | -0.91           | 0.03    |
| Hs_12plexchip_5_7113  | v2HS_197509 | TAAACCTTGAGCGTACAAGTC   | NM_001005386 | ACTR2    | ARP2 actin-related protein 2 homolog (yeast) (ACTR2), transcript variant 1, mRNA                                                  | -1.31         | 0.55        | -0.19        | 0.41       | -1.12           | 0.05    |
| Hs_12plexchip_5_11682 | v2HS_146619 | ATGTCAGGGCTATGTGGTTCCT  | AB209449     | ACVR2B   | ACTIVIN A RECEPTOR, TYPE IIB                                                                                                      | -1.94         | 0.28        | -0.74        | 1.18       | -1.20           | 0.22    |
| Hs_12plexchip_5_5343  | v2HS_91340  | TAATGATCTGGGAACCTAGCCC  | NM_001077401 | ACVRL1   | activin A receptor type II-like 1 (ACVRL1), transcript variant 2, mRNA                                                            | -1.24         | 0.97        | 0.52         | 0.69       | -1.76           | 0.07    |
| Hs0P00011130          | v2HS_33582  | TTTAACCTCCACAGTCTTGCT   | NM_021723    | ADAM22   | ADAM metalloproteinase domain 22 (ADAM22), transcript variant 1, mRNA                                                             | -1.15         | 0.16        | 0.14         | 0.20       | -1.29           | 0.00    |
| Hs_12plexchip_4_9875  | v2HS_199879 | TTCAGTTTACACGTTAGGGCTT  | NM_014479    | ADAMDEC1 | ADAM-like, decysin 1 (ADAMDEC1), mRNA                                                                                             | -1.39         | 0.82        | -0.63        | 0.17       | -0.76           | 0.25    |
| Hs_12plexchip_3_4823  | v2HS_123010 | TTGGTTCTTAATATTACGGCA   | NM_199355    | ADAMTS18 | ADAM metalloproteinase with thrombospondin type 1 motif, 18 (ADAMTS18), mRNA                                                      | -1.23         | 0.30        | -0.34        | 0.49       | -0.89           | 0.07    |
| Hs0P00011915          | v2HS_25008  | ATAGTGGAGTAGTCCGTTGGGCG | NM_213604    | ADAMTSL5 | ADAMTS-like 5 (ADAMTSL5), mRNA                                                                                                    | -1.35         | 0.20        | -0.23        | 0.36       | -1.12           | 0.02    |
| Hs_12plexchip_4_174   | v2HS_94323  | ATACAGCTCCTCAATTGTCTCGG | NM_001115    | ADCY8    | adenylate cyclase 8 (brain) (ADCY8), mRNA                                                                                         | -1.60         | 0.75        | -0.25        | 0.52       | -1.35           | 0.07    |
| Hs_12plexchip_5_10069 | v2HS_94354  | TTGTACTGAGATAGGCTGAGGA  | NM_001122    | ADFP     | adipose differentiation-related protein (ADFP), mRNA                                                                              | -0.80         | 0.61        | 0.26         | 0.30       | -1.06           | 0.08    |
| Hs_12plexchip_6_8791  | v2HS_285128 | TTTAAAGCCACCAAGAATAGCT  | NM_000667    | ADH1A    | alcohol dehydrogenase 1A (class 1), alpha polypeptide (ADH1A), mRNA                                                               | -0.87         | 0.06        | 0.13         | 0.28       | -1.00           | 0.02    |
| Hs_12plexchip_3_4651  | v2HS_111952 | TTTCAACCGAATTGGTGTGGG   | NM_000675    | ADORA2A  | adenosine A2a receptor (ADORA2A), mRNA                                                                                            | -1.75         | 0.15        | -1.03        | 0.21       | -0.72           | 0.01    |
| Hs_12plexchip_6_8644  | v2HS_221216 | ATTGTAACCCAGGGAGGAGGCG  | NM_017825    | ADPRHL2  | ADP-ribosylhydrolase like 2 (ADPRHL2), mRNA                                                                                       | -0.94         | 0.59        | 0.04         | 0.60       | -0.98           | 0.11    |
| Hs_12plexchip_2_11732 | v2HS_45839  | TTCTATATGGGTATAGGTCTCT  | NM_153207    | AEBP2    | AE binding protein 2 (AEBP2), mRNA                                                                                                | -1.40         | 0.65        | -0.60        | 0.10       | -0.80           | 0.16    |
| Hs_12plexchip_2_1689  | v2HS_80583  | GAAGAATATCTCTTGCCTGCG   | NM_021831    | AGBL5    | ATP/GTP binding protein-like 5 (AGBL5), transcript variant 1, mRNA                                                                | -1.14         | 0.65        | -0.37        | 0.54       | -0.77           | 0.19    |
| Hs_12plexchip_5_10898 | v2HS_130226 | AAGTACTTGAAGCTTCGCACGA  | NM_006412    | AGPAT2   | 1-acylglycerol-3-phosphate O-acyltransferase 2 (lysophosphatidic acid acyltransferase, beta) (AGPAT2), transcript variant 1, mRNA | -0.76         | 0.51        | 0.24         | 0.59       | -0.99           | 0.09    |

| Probe ID              | v2HS        | Sequence                | Accession    | Symbol    | Gene Name                                                                                             | Mut log2 mean | Mut log2 SD | WT log2 Mean | WT log2 SD | log2 difference | P-value |
|-----------------------|-------------|-------------------------|--------------|-----------|-------------------------------------------------------------------------------------------------------|---------------|-------------|--------------|------------|-----------------|---------|
| Hs_12plexchip_3_6377  | v2HS_112014 | TTTGTGAAAGGTTTGTAGTGGG  | NM_032049    | AGTR1     | angiotensin II receptor, type 1 (AGTR1), transcript variant 5, mRNA                                   | -1.65         | 0.43        | -0.84        | 0.37       | -0.81           | 0.07    |
| Hs_12plexchip_3_6625  | v2HS_230423 | TTTAATGCGCAACTTGAGGGCA  | XM_001126456 | AHCTF1    | PREDICTED:AT hook containing transcription factor 1 (AHCTF1), mRNA                                    | -2.67         | 0.81        | -1.06        | 0.44       | -1.61           | 0.06    |
| Hs_12plexchip_5_7108  | v2HS_112026 | TTAGCTCTTAGGAGGAGAGGT   | NM_000687    | AHCY      | S-adenosylhomocysteine hydrolase (AHCY), mRNA                                                         | -0.98         | 0.55        | 0.03         | 0.17       | -1.01           | 0.07    |
| Hs_12plexchip_6_628   | v2HS_70477  | TAGTCCCATCAGCATTCTTGGG  | NM_153326    | AKR1A1    | aldo-keto reductase family 1, member A1 (aldehyde reductase) (AKR1A1), transcript variant 2, mRNA     | -0.76         | 1.04        | 0.14         | 0.17       | -0.89           | 0.27    |
| Hs_12plexchip_5_10803 | v2HS_139166 | TTCCTCTATCCAGTCAATTGGG  | NM_033087    | ALG2      | asparagine-linked glycosylation 2 homolog (S. cerevisiae, alpha-1,3-mannosyltransferase) (ALG2), mRNA | -0.72         | 1.00        | 0.83         | 0.63       | -1.55           | 0.10    |
| Hs_12plexchip_5_2891  | v2HS_199745 | ATTCATCTTCACAGAGACTGCC  | NM_005787    | ALG3      | asparagine-linked glycosylation 3 homolog (S. cerevisiae, alpha-1,3-mannosyltransferase) (ALG3), mRNA | -1.39         | 0.75        | 0.83         | 2.18       | -2.22           | 0.21    |
| Hs0P00001565          | v2HS_63897  | ATTACCAACATGAGTTGCTGGC  | NM_139178    | ALKBH3    | alkB, alkylation repair homolog 3 (E. coli) (ALKBH3), mRNA                                            | -1.27         | 0.16        | -0.26        | 0.22       | -1.01           | 0.00    |
| Hs_12plexchip_3_11335 | v2HS_238167 | TATTGGTGTGCTAGACTCGC    | NM_032306    | ALKBH7    | alkB, alkylation repair homolog 7 (E. coli) (ALKBH7), mRNA                                            | -1.65         | 0.05        | -0.35        | 0.24       | -1.31           | 0.01    |
| Hs_12plexchip_2_6029  | v2HS_175592 | TTCAATTCGAGTTATTACTCCA  | NM_018436    | ALLC      | allantoicase (ALLC), transcript variant 1, mRNA                                                       | -0.96         | 0.19        | 0.08         | 0.46       | -1.04           | 0.04    |
| Hs_12plexchip_4_2089  | v2HS_175593 | TTTGGTGGGAGACAACCTGGT   | NM_018436    | ALLC      | allantoicase (ALLC), transcript variant 1, mRNA                                                       | -0.88         | 0.25        | 0.00         | 0.17       | -0.88           | 0.01    |
| Hs_12plexchip_4_10591 | v2HS_87865  | TATATGAACACAAGAAAGTCT   | NM_015120    | ALMS1     | Alstrom syndrome 1 (ALMS1), mRNA                                                                      | -0.95         | 0.16        | 0.88         | 0.16       | -1.82           | 0.00    |
| Hs_12plexchip_4_3916  | v2HS_220995 | AAGAACTTCCATAGTGGCTGGA  | AK130065     | ALS2CR16  | AMYOTROPHIC LATERAL SCLEROSIS 2 (JUVENILE) CHROMOSOME REGION, CANDIDATE 16                            | -0.86         | 0.68        | 0.56         | 0.29       | -1.43           | 0.05    |
| Hs_12plexchip_5_2570  | v2HS_206751 | ATTTGAAGAGATTGGGACCTG   | NM_001144    | AMFR      | autocrine motility factor receptor (AMFR), mRNA                                                       | -0.86         | 0.43        | 0.10         | 0.24       | -0.96           | 0.04    |
| Hs_12plexchip_3_10016 | v2HS_132555 | ATTGTGAATAATGAAGTATCCT  | NM_001635    | AMPH      | amphiphysin (AMPH), transcript variant 1, mRNA                                                        | -0.92         | 0.16        | 0.38         | 0.21       | -1.30           | 0.00    |
| Hs_12plexchip_3_9551  | v2HS_238499 | AATTTCTAGTCCATGCTAAGCG  | NM_022662    | ANAPC1    | anaphase promoting complex subunit 1 (ANAPC1), mRNA                                                   | -0.95         | 0.29        | -0.07        | 0.95       | -0.89           | 0.24    |
| Hs_12plexchip_4_11284 | v2HS_98169  | AATAGACATATCCATGGTGCCT  | NM_022662    | ANAPC1    | anaphase promoting complex subunit 1 (ANAPC1), mRNA                                                   | -1.74         | 0.26        | 0.35         | 0.66       | -2.08           | 0.02    |
| Hs_12plexchip_6_810   | v2HS_98171  | TTTATGCAACAGTTAAATGCT   | NM_022662    | ANAPC1    | anaphase promoting complex subunit 1 (ANAPC1), mRNA                                                   | -1.58         | 0.10        | -0.32        | 0.92       | -1.26           | 0.14    |
| Hs0P00006179          | v2HS_98167  | TATTAGTAATCGTTTCTGTCCA  | NM_022662    | ANAPC1    | anaphase promoting complex subunit 1 (ANAPC1), mRNA                                                   | -1.15         | 0.43        | -0.21        | 0.61       | -0.94           | 0.10    |
| Hs0P00003370          | v2HS_64696  | TACTTCTTGACAGTAAGCCTCCA | NM_013366    | ANAPC2    | ANAPHASE PROMOTING COMPLEX SUBUNIT 2                                                                  | -1.35         | 1.42        | -0.22        | 0.04       | -1.13           | 0.30    |
| Hs_12plexchip_5_3713  | v2HS_254660 | ATACAATGGAATACAGATTGCT  | NM_013367    | ANAPC4    | anaphase promoting complex subunit 4 (ANAPC4), mRNA                                                   | -1.32         | 0.20        | 0.45         | 0.63       | -1.78           | 0.03    |
| Hs_12plexchip_6_1012  | v2HS_64633  | TATACTAAAGACAAAGGCAGCT  | NM_013367    | ANAPC4    | anaphase promoting complex subunit 4 (ANAPC4), mRNA                                                   | -0.74         | 0.36        | 0.11         | 0.62       | -0.85           | 0.13    |
| Hs_12plexchip_6_6071  | v2HS_245893 | ATATTTCTAGGTGAAACAAGCT  | NM_153228    | ANKFN1    | ankyrin-repeat and fibronectin type III domain containing 1 (ANKFN1), mRNA                            | -0.83         | 0.16        | 0.28         | 1.22       | -1.11           | 0.26    |
| Hs0P00003147          | v2HS_34481  | TTGTAGGATTCATACGACGTT   | XM_001132013 | ANKH      | PREDICTED:ankylolysis, progressive homolog (mouse) (ANKH), mRNA                                       | -1.00         | 0.50        | -0.23        | 0.68       | -0.76           | 0.20    |
| Hs_12plexchip_2_631   | v2HS_117000 | TTTCTTCTTGTTAGACGGC     | NM_030816    | ANKRD13C  | ankyrin repeat domain 13C (ANKRD13C), mRNA                                                            | -1.39         | 0.23        | -0.58        | 0.69       | -0.81           | 0.17    |
| Hs_12plexchip_6_5197  | v2HS_237714 | ATTATTGTCTTGTCCAGTGT    | NM_032250    | ANKRD20A1 | ankyrin repeat domain 20 family, member A1 (ANKRD20A1), mRNA                                          | -1.17         | 0.48        | -0.28        | 1.00       | -0.89           | 0.26    |
| Hs_12plexchip_3_10221 | v2HS_96041  | TTACATTCAGTGATTAACCTCT  | NM_014915    | ANKRD26   | ankyrin repeat domain 26 (ANKRD26), mRNA                                                              | -0.76         | 0.40        | 0.53         | 0.38       | -1.29           | 0.02    |
| Hs_12plexchip_5_9857  | v2HS_268762 | AAGAGTTCACAATTTCAAGGCT  | NM_001154    | ANXA5     | annexin A5 (ANXA5), mRNA                                                                              | -1.67         | 0.54        | -0.35        | 0.31       | -1.31           | 0.03    |
| Hs_12plexchip_5_7578  | v2HS_267070 | TTAGGGTTGTAATTAGACAGGC  | NM_001282    | AP2B1     | adaptor-related protein complex 2, beta 1 subunit (AP2B1), transcript variant 2, mRNA                 | -0.90         | 0.72        | 0.76         | 0.91       | -1.66           | 0.07    |
| Hs_12plexchip_2_1576  | v2HS_86184  | TTATGAGTACTGGTTGTTTCGC  | NM_007347    | AP4E1     | adaptor-related protein complex 4, epsilon 1 subunit (AP4E1), mRNA                                    | -1.15         | 0.25        | -0.37        | 0.53       | -0.78           | 0.11    |
| Hs_12plexchip_3_563   | v2HS_48895  | CTTTATTGGGATGTTAGTAGGG  | NM_001024807 | APLP1     | amyloid beta (A4) precursor-like protein 1 (APLP1), transcript variant 1, mRNA                        | -0.82         | 0.30        | -0.11        | 0.37       | -0.71           | 0.07    |

| Probe ID              | v2HS        | Sequence                | Accession    | Symbol   | Gene Name                                                                                                                                                       | Mut log2 mean | Mut log2 SD | WT log2 Mean | WT log2 SD | log2 difference | P-value |
|-----------------------|-------------|-------------------------|--------------|----------|-----------------------------------------------------------------------------------------------------------------------------------------------------------------|---------------|-------------|--------------|------------|-----------------|---------|
| Hs_12plexchip_6_8712  | v2HS_236310 | TTGATGCGGCTGATGAGTCCC   | NM_001645    | APOC1    | apolipoprotein C-1 (APOC1), mRNA                                                                                                                                | -1.68         | 0.30        | -0.36        | 1.08       | -1.33           | 0.16    |
| Hs_12plexchip_5_6098  | v2HS_262529 | TATAATGATCCTCATATAACCA  | NM_001018159 | APPBP1   | amyloid beta precursor protein binding protein 1 (APPBP1), transcript variant 2, mRNA                                                                           | -2.57         | 1.47        | 0.62         | 0.08       | -3.19           | 0.06    |
| Hs_12plexchip_4_142   | v2HS_239573 | TAGTGCAATCATTTCTGCTGGC  | NM_001011645 | AR       | androgen receptor (dihydrotestosterone receptor; testicular feminization; spinal and bulbar muscular atrophy; Kennedy disease) (AR), transcript variant 2, mRNA | -1.26         | 0.61        | -0.48        | 0.28       | -0.78           | 0.14    |
| Hs_12plexchip_3_11199 | v2HS_132656 | TTAGACTTGAGATCTCGTGGGA  | NM_001654    | ARAF     | v-raf murine sarcoma 3611 viral oncogene homolog (ARAF), mRNA                                                                                                   | -1.37         | 0.79        | -0.39        | 1.05       | -0.98           | 0.27    |
| Hs_12plexchip_4_2811  | v2HS_219865 | ATTATTGTGAAAGCTCGTGGG   | NM_003491    | ARD1A    | ARD1 homolog A, N-acetyltransferase (S. cerevisiae) (ARD1A), mRNA                                                                                               | -1.05         | 0.54        | 0.08         | 0.37       | -1.14           | 0.05    |
| Hs_12plexchip_5_10666 | v2HS_268217 | TTACGAAGAGACTGAAGCCCTA  | NM_001660    | ARF4     | ADP-ribosylation factor 4 (ARF4), mRNA                                                                                                                          | -1.13         | 0.92        | -0.37        | 0.23       | -0.76           | 0.29    |
| Hs_12plexchip_6_5665  | v2HS_178481 | TATAACCCACTCAGCATTTGGG  | NM_033515    | ARHGAP18 | Rho GTPase activating protein 18 (ARHGAP18), mRNA                                                                                                               | -0.89         | 0.58        | 0.11         | 1.07       | -1.00           | 0.25    |
| Hs_12plexchip_2_1027  | v2HS_117113 | ATATTGTGTTTCTCTCTCGGT   | NM_031305    | ARHGAP24 | Rho GTPase activating protein 24 (ARHGAP24), transcript variant 2, mRNA                                                                                         | -1.03         | 0.65        | -0.27        | 0.20       | -0.76           | 0.17    |
| Hs_12plexchip_6_1612  | v2HS_201002 | ATCTTTGGAGGTAATCTTTCGC  | NM_017519    | ARID1B   | AT rich interactive domain 1B (SWI1-like) (ARID1B), transcript variant 1, mRNA                                                                                  | -1.54         | 0.28        | 0.07         | 1.01       | -1.60           | 0.10    |
| Hs_12plexchip_5_4153  | v2HS_257234 | TAAGTCTAGAGAAGAAGTCCCT  | NM_212481    | ARID5A   | AT rich interactive domain 5A (MRF1-like) (ARID5A), mRNA                                                                                                        | -0.95         | 0.19        | 0.49         | 0.19       | -1.44           | 0.00    |
| Hs_12plexchip_5_4345  | v2HS_75283  | TTAAGTCTAGAGAAGAAGTCCC  | NM_212481    | ARID5A   | AT rich interactive domain 5A (MRF1-like) (ARID5A), mRNA                                                                                                        | -0.81         | 0.40        | 0.60         | 0.03       | -1.41           | 0.02    |
| Hs_12plexchip_3_1507  | v2HS_47342  | TATTCTGGAGATTGAGATGCT   | NM_001012990 | ARL13A   | ADP-ribosylation factor-like 13A (ARL13A), mRNA                                                                                                                 | -1.11         | 0.19        | -0.37        | 0.20       | -0.74           | 0.01    |
| Hs_12plexchip_4_1272  | v2HS_198492 | GACCACCTTTAAGAAGCACTGCA | NM_001037164 | ARL4A    | ADP-ribosylation factor-like 4A (ARL4A), transcript variant 3, mRNA                                                                                             | -1.67         | 0.58        | -0.63        | 0.57       | -1.04           | 0.09    |
| Hs_12plexchip_5_4140  | v2HS_87306  | ATATACATAGCAAACATGACCG  | NM_022374    | ARL6IP2  | ADP-ribosylation factor-like 6 interacting protein 2 (ARL6IP2), mRNA                                                                                            | -0.72         | 0.02        | 0.45         | 0.36       | -1.16           | 0.03    |
| Hs_12plexchip_5_4211  | v2HS_84733  | ATTTGTAAGTGATGTTCTCT    | NM_138795    | ARL8A    | ADP-ribosylation factor-like 8A (ARL8A), mRNA                                                                                                                   | -1.21         | 0.62        | -0.42        | 0.51       | -0.79           | 0.17    |
| Hs_12plexchip_2_11040 | v2HS_49418  | TTAGCCTTGGTCTGTGCTACTG  | NM_152583    | ARMCX4   | ARMADILLO REPEAT CONTAINING, X-LINKED 4                                                                                                                         | -1.17         | 0.37        | -0.43        | 0.54       | -0.75           | 0.13    |
| Hs_12plexchip_4_1283  | v2HS_5802   | TAGCAAAGAGACATTGTATCCT  | NM_152862    | ARPC2    | actin related protein 2/3 complex, subunit 2, 34kDa (ARPC2), transcript variant 1, mRNA                                                                         | -1.88         | 0.10        | -0.74        | 0.41       | -1.14           | 0.03    |
| Hs_12plexchip_4_9167  | v2HS_199293 | TTTAGACTCAACATACATGGTC  | NM_152862    | ARPC2    | actin related protein 2/3 complex, subunit 2, 34kDa (ARPC2), transcript variant 1, mRNA                                                                         | -0.81         | 0.24        | 0.25         | 0.43       | -1.06           | 0.03    |
| Hs_12plexchip_5_2987  | v2HS_199425 | AATTTCAAAGAAATACTGACCA  | NM_152862    | ARPC2    | actin related protein 2/3 complex, subunit 2, 34kDa (ARPC2), transcript variant 1, mRNA                                                                         | -0.99         | 0.31        | -0.13        | 0.26       | -0.86           | 0.02    |
| Hs_12plexchip_2_12230 | v2HS_202600 | TTACTTATCTTATTAAGCGCC   | NM_005719    | ARPC3    | actin related protein 2/3 complex, subunit 3, 21kDa (ARPC3), mRNA                                                                                               | -1.01         | 0.10        | 0.20         | 0.44       | -1.22           | 0.04    |
| Hs_12plexchip_4_1426  | v2HS_203286 | ATTAAGCGCCAGCTTTAATGCT  | NM_005719    | ARPC3    | actin related protein 2/3 complex, subunit 3, 21kDa (ARPC3), mRNA                                                                                               | -0.70         | 0.79        | 1.22         | 0.95       | -1.93           | 0.06    |
| Hs_12plexchip_2_12494 | v2HS_198709 | AATCTTCTCGATCTCATCAGCC  | NM_005718    | ARPC4    | actin related protein 2/3 complex, subunit 4, 20kDa (ARPC4), transcript variant 1, mRNA                                                                         | -1.05         | 0.30        | -0.01        | 0.86       | -1.05           | 0.16    |
| Hs_12plexchip_5_11722 | v2HS_137913 | AAGAACTCTTATAATGGAGCCT  | NM_030978    | ARPC5L   | actin related protein 2/3 complex, subunit 5-like (ARPC5L), mRNA                                                                                                | -1.93         | 0.57        | -0.89        | 1.08       | -1.04           | 0.23    |
| Hs_12plexchip_6_1235  | v2HS_89145  | CTGCAATACCAATTAATCACGT  | NM_001079536 | ART5     | ADP-ribosyltransferase 5 (ART5), transcript variant 2, mRNA                                                                                                     | -0.73         | 1.73        | 1.43         | 1.70       | -2.16           | 0.20    |
| Hs_12plexchip_3_2527  | v2HS_57238  | ATAGTCCATGGTGTGGCGCTG   | NM_080871    | ASB10    | ankyrin repeat and SOCS box-containing 10 (ASB10), mRNA                                                                                                         | -2.07         | 0.14        | -1.08        | 0.64       | -0.99           | 0.11    |
| Hs_12plexchip_5_881   | v2HS_249261 | AATCACTGGTCTTGCCATGGG   | NM_080863    | ASB16    | ankyrin repeat and SOCS box-containing 16 (ASB16), mRNA                                                                                                         | -1.24         | 0.62        | 0.37         | 0.10       | -1.61           | 0.04    |
| Hs_12plexchip_5_3598  | v2HS_247779 | ATGTAATCTGTGAGTAGTGCGT  | NM_080868    | ASB17    | ankyrin repeat and SOCS box-containing 17 (ASB17), mRNA                                                                                                         | -0.85         | 0.41        | 1.10         | 0.24       | -1.95           | 0.00    |
| Hs_12plexchip_5_3523  | v2HS_157377 | TTTAACGTAGGATCAGTCCG    | NM_198243    | ASB7     | ankyrin repeat and SOCS box-containing 7 (ASB7), transcript variant 2, mRNA                                                                                     | -1.03         | 0.35        | 0.01         | 0.82       | -1.04           | 0.15    |
| Hs_12plexchip_4_314   | v2HS_201941 | TAAGTCTTGGATATAAACTGGC  | NM_006828    | ASCC3    | activating signal cointegrator 1 complex subunit 3 (ASCC3), transcript variant 1, mRNA                                                                          | -0.82         | 0.51        | 0.36         | 0.46       | -1.18           | 0.04    |

| Probe ID              | v2HS        | Sequence               | Accession | Symbol   | Gene Name                                                                                                                                           | Mut log2 mean | Mut log2 SD | WT log2 Mean | WT log2 SD | log2 difference | P-value |
|-----------------------|-------------|------------------------|-----------|----------|-----------------------------------------------------------------------------------------------------------------------------------------------------|---------------|-------------|--------------|------------|-----------------|---------|
| Hs_12plexchip_6_194   | v2HS_60298  | AATCTCCAATCTTCATCTGCC  | NM_014014 | ASCC3L1  | activating signal cointegrator 1 complex subunit 3-like 1 (ASCC3L1), mRNA                                                                           | -3.07         | 0.52        | -1.67        | 1.59       | -1.40           | 0.26    |
| HsOP00011911          | v2HS_15357  | TTACTAACTCTGTGTAGCCCGT | NM_004318 | ASPH     | aspartate beta-hydroxylase (ASPH), transcript variant 1, mRNA                                                                                       | -0.97         | 0.21        | -0.01        | 0.44       | -0.96           | 0.04    |
| Hs_12plexchip_5_823   | v2HS_249750 | AAGAGTCATCAAAGAGAAGGCA | NM_020437 | ASPHD2   | aspartate beta-hydroxylase domain containing 2 (ASPHD2), mRNA                                                                                       | -0.80         | 0.87        | 1.55         | 0.37       | -2.34           | 0.03    |
| Hs_12plexchip_6_6322  | v2HS_250829 | TTATTGCTACATCCAGTGCCT  | NM_017552 | ATAD2B   | ATPase family, AAA domain containing 2B (ATAD2B), mRNA                                                                                              | -0.86         | 0.60        | 0.38         | 0.46       | -1.24           | 0.05    |
| Hs_12plexchip_6_10673 | v2HS_161507 | TTCTTTGAGAACTTGCCAGCA  | NM_033388 | ATG16L2  | ATG16 autophagy related 16-like 2 (S. cerevisiae) (ATG16L2), mRNA                                                                                   | -1.28         | 1.17        | 0.38         | 1.61       | -1.66           | 0.23    |
| Hs_12plexchip_5_8858  | v2HS_118170 | TTGAGCAAGAGAACAGATTGCT | NM_052936 | ATG4A    | ATG4 autophagy related 4 homolog A (S. cerevisiae) (ATG4A), transcript variant 1, mRNA                                                              | -1.37         | 0.80        | 0.30         | 1.41       | -1.67           | 0.17    |
| Hs_12plexchip_5_12220 | v2HS_249282 | TAAGTTTCTGAGATTGTATGCT | NM_004849 | ATG5     | ATG5 autophagy related 5 homolog (S. cerevisiae) (ATG5), mRNA                                                                                       | -1.06         | 0.74        | -0.10        | 0.30       | -0.96           | 0.14    |
| HsOP00012021          | v2HS_48744  | TAGATTTGGCCATCTGCAGGG  | NM_005172 | ATOH1    | atonal homolog 1 (Drosophila) (ATOH1), mRNA                                                                                                         | -1.50         | 0.72        | -0.46        | 1.23       | -1.04           | 0.29    |
| HsOP00008576          | v2HS_136029 | TATAAGTAGTCTGTGGTCTGGC | NM_024490 | ATP10A   | ATPase, class V, type 10A (ATP10A), mRNA                                                                                                            | -0.77         | 0.20        | -0.02        | 0.22       | -0.75           | 0.01    |
| Hs_12plexchip_2_3491  | v2HS_78722  | ATATAGATGCTGATGAGGACCC | NM_032279 | ATP13A4  | ATPase type 13A4 (ATP13A4), mRNA                                                                                                                    | -0.75         | 0.40        | 0.01         | 0.87       | -0.76           | 0.27    |
| Hs_12plexchip_5_7822  | v2HS_112114 | TTACCTCTGATATGATGCCCA  | NM_000702 | ATP1A2   | ATPase, Na+/K+ transporting, alpha 2 (+) polypeptide (ATP1A2), mRNA                                                                                 | -1.44         | 1.44        | 0.12         | 0.88       | -1.56           | 0.20    |
| Hs_12plexchip_4_8604  | v2HS_132777 | TTATTACAGTCCACAGTCTGCT | NM_001679 | ATP1B3   | ATPase, Na+/K+ transporting, beta 3 polypeptide (ATP1B3), mRNA                                                                                      | -1.07         | 0.98        | 0.43         | 1.29       | -1.50           | 0.19    |
| Hs_12plexchip_2_6141  | v2HS_169195 | AATCATGTCATCTCTGGGCT   | NG_001081 | ATP1BL1  | ATPASE, NA+/K+ TRANSPORTING, BETA POLYPEPTIDE-LIKE 1                                                                                                | -0.73         | 0.61        | 0.02         | 0.42       | -0.75           | 0.17    |
| Hs_12plexchip_5_11866 | v2HS_273055 | TTTATCTGGTTGACAGCTCGT  | NM_001681 | ATP2A2   | ATPase, Ca++ transporting, cardiac muscle, slow twitch 2 (ATP2A2), transcript variant 2, mRNA                                                       | -1.46         | 0.35        | -0.25        | 0.87       | -1.21           | 0.12    |
| Hs_12plexchip_4_1511  | v2HS_210068 | TATAATTATCTCTGGCACGGG  | NM_006356 | ATP5H    | ATP synthase, H+ transporting, mitochondrial F0 complex, subunit d (ATP5H), nuclear gene encoding mitochondrial protein, transcript variant 1, mRNA | -2.61         | 0.13        | -1.69        | 0.47       | -0.92           | 0.07    |
| HsOP00010661          | v2HS_39732  | TATAAACTCTCCAGCTGAGCCA | NM_006045 | ATP9A    | ATPase, class II, type 9A (ATP9A), mRNA                                                                                                             | -1.19         | 0.24        | -0.28        | 0.50       | -0.91           | 0.07    |
| HsOP00005252          | v2HS_115322 | TATTGGCAAAGTACTCCATGCA | NM_016301 | ATPBD1C  | ATP binding domain 1 family, member C (ATPBD1C), mRNA                                                                                               | -1.33         | 0.57        | -0.35        | 0.66       | -0.98           | 0.13    |
| Hs_12plexchip_5_11693 | v2HS_138999 | TAAAGGGATCTAGGGCTTCGGC | NM_033027 | AXUD1    | AXIN1 up-regulated 1 (AXUD1), mRNA                                                                                                                  | -2.29         | 0.36        | -0.99        | 0.80       | -1.30           | 0.09    |
| Hs_12plexchip_5_12166 | v2HS_243530 | TAATAGTTGCGATCACTTCCG  | NM_004776 | B4GALT5  | UDP-Gal:betaGlcNAc beta 1,4-galactosyltransferase, polypeptide 5 (B4GALT5), mRNA                                                                    | -0.74         | 0.19        | 0.13         | 0.14       | -0.87           | 0.00    |
| Hs_12plexchip_5_3392  | v2HS_14380  | TTAATCATCATCTGAAATCGT  | NM_021813 | BACH2    | BTB and CNC homology 1, basic leucine zipper transcription factor 2 (BACH2), mRNA                                                                   | -0.97         | 0.57        | 1.25         | 0.35       | -2.22           | 0.01    |
| Hs_12plexchip_3_9768  | v2HS_136710 | AAGTAGCAGGTGCTTCTCTGCT | NM_025045 | BAIAP2L2 | BAI1-associated protein 2-like 2 (BAIAP2L2), mRNA                                                                                                   | -1.44         | 0.37        | -0.69        | 0.68       | -0.74           | 0.19    |
| Hs_12plexchip_5_1696  | v2HS_216845 | GATGTACTGCATCTTCAGACGC | NM_006317 | BASP1    | brain abundant, membrane attached signal protein 1 (BASP1), mRNA                                                                                    | -2.57         | 0.57        | -0.79        | 1.64       | -1.78           | 0.19    |
| Hs_12plexchip_4_4936  | v2HS_238907 | ATCTTTAAACTGCTGATACCGA | NM_080598 | BAT1     | HLA-B associated transcript 1 (BAT1), transcript variant 2, mRNA                                                                                    | -3.42         | 0.30        | -1.62        | 1.17       | -1.81           | 0.11    |
| Hs_12plexchip_5_10118 | v2HS_269487 | ATTTCCGACTGAAGAGTGAGCC | NM_138578 | BCL2L1   | BCL2-like 1 (BCL2L1), nuclear gene encoding mitochondrial protein, transcript variant 1, mRNA                                                       | -0.97         | 0.62        | -0.05        | 0.83       | -0.91           | 0.21    |
| Hs_12plexchip_4_11126 | v2HS_11736  | ATAGACTTGCCTCAGACAGCG  | NM_015367 | BCL2L13  | BCL2-like 13 (apoptosis facilitator) (BCL2L13), nuclear gene encoding mitochondrial protein, mRNA                                                   | -1.44         | 0.80        | -0.51        | 0.37       | -0.93           | 0.17    |
| Hs_12plexchip_3_5118  | v2HS_112157 | ATTTAACTCCACAATCCTTGCA | NM_000710 | BDKRB1   | bradykinin receptor B1 (BDKRB1), mRNA                                                                                                               | -0.90         | 0.43        | -0.18        | 0.46       | -0.72           | 0.12    |
| Hs_12plexchip_5_3956  | v2HS_56729  | TATAGCAAGCCAAGTCTGGGTG | AK013874  | BFAR     | BIFUNCTIONAL APOPTOSIS REGULATOR                                                                                                                    | -0.83         | 0.91        | 0.22         | 0.16       | -1.06           | 0.18    |
| Hs_12plexchip_5_9112  | v2HS_233010 | ATAGTTTCCCAAAGCCTTGGCT | NM_001195 | BFSP1    | beaded filament structural protein 1, filensin (BFSP1), mRNA                                                                                        | -1.68         | 0.39        | -0.42        | 0.28       | -1.26           | 0.01    |
| Hs_12plexchip_6_957   | v2HS_15182  | TATGCATGTGTTAATAGCA    | NM_004329 | BMPR1A   | bone morphogenetic protein receptor, type IA (BMPR1A), mRNA                                                                                         | -1.47         | 1.64        | 1.67         | 2.65       | -3.14           | 0.17    |

| Probe ID              | v2HS        | Sequence               | Accession    | Symbol    | Gene Name                                                                                       | Mut log2 mean | Mut log2 SD | WT log2 Mean | WT log2 SD | log2 difference | P-value |
|-----------------------|-------------|------------------------|--------------|-----------|-------------------------------------------------------------------------------------------------|---------------|-------------|--------------|------------|-----------------|---------|
| Hs_12plexchip_5_6586  | v2HS_15167  | GAAGAGTAGGATATTCACATGT | NM_004333    | BRAF      | v-raf murine sarcoma viral oncogene homolog B1 (BRAF), mRNA                                     | -0.84         | 0.46        | -0.12        | 0.13       | -0.72           | 0.10    |
| Hs_12plexchip_4_5082  | v2HS_89236  | TTCCAGTCCACTTTCAGAGGC  | NM_000059    | BRCA2     | breast cancer 2, early onset (BRCA2), mRNA                                                      | -0.83         | 0.56        | 0.37         | 0.81       | -1.20           | 0.11    |
| Hs_12plexchip_2_1880  | v2HS_73646  | CTGTTGCATGAGAGCCTGGGCG | NM_021938    | BRUNOL5   | bruno-like 5, RNA binding protein (Drosophila) (BRUNOL5), mRNA                                  | -0.87         | 0.37        | -0.16        | 0.30       | -0.71           | 0.06    |
| Hs_12plexchip_5_11536 | v2HS_195805 | TATAGAAATCTCAGCAGCGCCA | NM_025238    | BTBD1     | BTB (POZ) domain containing 1 (BTBD1), transcript variant 1, mRNA                               | -0.88         | 0.50        | 0.38         | 0.89       | -1.26           | 0.12    |
| Hs0P00004338          | v2HS_14497  | TAATGACAGAGAAAGCACCA   | AK122818     | BTBD11    | BTB (POZ) DOMAIN CONTAINING 11                                                                  | -0.95         | 0.59        | 0.13         | 0.76       | -1.08           | 0.13    |
| Hs_12plexchip_3_2211  | v2HS_63299  | TAATTGAGGTCCATATCCCGGC | NM_152733    | BTBD9     | BTB (POZ) domain containing 9 (BTBD9), transcript variant 3, mRNA                               | -1.23         | 0.34        | -0.53        | 0.53       | -0.70           | 0.14    |
| Hs_12plexchip_4_9781  | v2HS_95148  | TTATTGACGGGACATCTGAGCC | NM_181531    | BTN2A2    | butyrophilin, subfamily 2, member A2 (BTN2A2), transcript variant 2, mRNA                       | -1.17         | 0.38        | -0.15        | 0.96       | -1.02           | 0.20    |
| Hs_12plexchip_6_801   | v2HS_36634  | TTCTCTACCATTAAAGGTCCA  | NM_004725    | BUB3      | BUB3 budding uninhibited by benzimidazoles 3 homolog (yeast) (BUB3), transcript variant 1, mRNA | -0.96         | 0.18        | 0.33         | 1.06       | -1.29           | 0.17    |
| Hs_12plexchip_3_12487 | v2HS_240452 | ATTGGGTGCACCTATAGAGCAG | M16601       | BVR1      | BURKITT LYMPHOMA VARIANT REARRANGING REGION 1                                                   | -0.77         | 0.18        | 0.17         | 0.93       | -0.94           | 0.22    |
| Hs_12plexchip_5_4769  | v2HS_257526 | ATTACTAGATTATTGGCCGCT  | NM_032194    | BXDC1     | brix domain containing 1 (BXDC1), mRNA                                                          | -1.44         | 0.33        | 0.43         | 1.01       | -1.87           | 0.07    |
| Hs_12plexchip_6_2513  | v2HS_219526 | TTAATCACAAATAGCTTATCCT | NM_018321    | BXDC2     | brix domain containing 2 (BXDC2), mRNA                                                          | -2.56         | 1.79        | -0.72        | 0.48       | -1.84           | 0.21    |
| Hs_12plexchip_6_3661  | v2HS_276935 | TTTGTAATCCGTTTCTTCTCT  | NM_018321    | BXDC2     | brix domain containing 2 (BXDC2), mRNA                                                          | -0.72         | 0.52        | 0.12         | 0.36       | -0.84           | 0.09    |
| Hs_12plexchip_6_4225  | v2HS_275380 | TTGAACAAGGAATTTAGCAGAT | NM_018321    | BXDC2     | brix domain containing 2 (BXDC2), mRNA                                                          | -2.51         | 0.94        | -0.33        | 1.42       | -2.18           | 0.10    |
| Hs_12plexchip_5_11048 | v2HS_235217 | TTTACCAAGTTC AAGATAGGC | NM_025065    | BXDC5     | brix domain containing 5 (BXDC5), mRNA                                                          | -1.09         | 0.89        | 0.66         | 0.41       | -1.75           | 0.06    |
| Hs_12plexchip_3_156   | v2HS_39009  | TTAACACTTCACTGTAACCTCT | NM_153367    | C10orf56  | chromosome 10 open reading frame 56 (C10orf56), mRNA                                            | -1.18         | 0.46        | 0.19         | 1.39       | -1.36           | 0.23    |
| Hs_12plexchip_2_7939  | v2HS_158351 | AATATGCATCCCAAACGTCGGG | BC036365     | C10ORF81  | CHROMOSOME 10 OPEN READING FRAME 81                                                             | -1.04         | 0.61        | -0.09        | 0.57       | -0.95           | 0.12    |
| Hs_12plexchip_4_3707  | v2HS_221262 | ATCAAGAACATCTTACTGTCCA | NM_173590    | C11ORF36  | CHROMOSOME 11 OPEN READING FRAME 36                                                             | -1.48         | 0.75        | -0.33        | 0.46       | -1.15           | 0.10    |
| Hs_12plexchip_4_3792  | v2HS_185368 | ATAATGATACATGCTCTGCCCT | NM_212555    | C11orf38  | chromosome 11 open reading frame 38 (C11orf38), mRNA                                            | -0.70         | 0.46        | 0.52         | 0.65       | -1.22           | 0.06    |
| Hs_12plexchip_6_7155  | v2HS_228510 | AATAGTTTCAGTTGCTCAGCCC | NM_032127    | C11orf56  | chromosome 11 open reading frame 56 (C11orf56), transcript variant 1, mRNA                      | -1.75         | 1.06        | 0.51         | 0.61       | -2.26           | 0.04    |
| Hs0P00011939          | v2HS_29862  | TTGACAAACCAAGGGCTCAGGG | NM_145017    | C11orf66  | chromosome 11 open reading frame 66 (C11orf66), mRNA                                            | -1.13         | 0.36        | -0.41        | 0.29       | -0.72           | 0.06    |
| Hs_12plexchip_6_4960  | v2HS_285512 | TTGTTGTTAGGAGACCTCAGGC | NM_173578    | C11orf72  | chromosome 11 open reading frame 72 (C11orf72), mRNA                                            | -1.18         | 0.47        | -0.17        | 0.33       | -1.01           | 0.05    |
| Hs_12plexchip_5_8254  | v2HS_264911 | TTATACTCTTATAACATTGCG  | NM_001099676 | C12orf56  | chromosome 12 open reading frame 56 (C12orf56), mRNA                                            | -1.30         | 0.36        | -0.17        | 0.17       | -1.13           | 0.02    |
| Hs_12plexchip_5_12893 | v2HS_59558  | ATTAGCATGGATCGTCTGTCT  | NM_014059    | C13orf15  | chromosome 13 open reading frame 15 (C13orf15), mRNA                                            | -1.48         | 0.73        | 0.21         | 0.69       | -1.68           | 0.04    |
| Hs0P00012174          | v2HS_19844  | AATAATTCAGACATATCTCTCT | NM_145248    | C13orf28  | chromosome 13 open reading frame 28 (C13orf28), mRNA                                            | -1.60         | 0.54        | -0.47        | 0.68       | -1.12           | 0.09    |
| Hs_12plexchip_2_11214 | v2HS_45699  | TATGCTTAACACAATGCCTGAC | NM_153218    | C13orf31  | chromosome 13 open reading frame 31 (C13orf31), mRNA                                            | -0.75         | 0.62        | 0.65         | 0.38       | -1.39           | 0.04    |
| Hs_12plexchip_4_4497  | v2HS_218412 | TTATTTCTTGATTCGGTTCTCT | NM_017970    | C14orf102 | chromosome 14 open reading frame 102 (C14orf102), transcript variant 1, mRNA                    | -1.51         | 0.39        | -0.71        | 0.40       | -0.80           | 0.07    |
| Hs_12plexchip_4_2778  | v2HS_176994 | ATTCCCAACAGTCTGGGTGCG  | NM_001102367 | C14orf159 | chromosome 14 open reading frame 159 (C14orf159), transcript variant 2, mRNA                    | -1.24         | 0.45        | -0.33        | 0.32       | -0.91           | 0.05    |
| Hs_12plexchip_3_11691 | v2HS_221027 | ATAATCAAATACAATACAGGGC | NM_017815    | C14orf94  | chromosome 14 open reading frame 94 (C14orf94), mRNA                                            | -0.88         | 0.31        | -0.05        | 0.28       | -0.83           | 0.03    |
| Hs_12plexchip_3_3267  | v2HS_62948  | TTAATAAAGGGCTTTGTGTGCT | L17330       | C15ORF31  | CHROMOSOME 15 OPEN READING FRAME 31                                                             | -1.12         | 0.43        | -0.40        | 0.37       | -0.72           | 0.09    |
| Hs_12plexchip_6_6781  | v2HS_157506 | ATAAAGAAGATTGGAGGCCGCA | NM_024731    | C16orf44  | chromosome 16 open reading frame 44 (C16orf44), mRNA                                            | -0.93         | 0.12        | -0.07        | 1.02       | -0.85           | 0.28    |
| Hs_12plexchip_2_9753  | v2HS_25531  | TTCATGGATGGGATTATCAGAA | NM_152308    | C16orf75  | chromosome 16 open reading frame 75 (C16orf75), mRNA                                            | -1.04         | 0.31        | -0.17        | 0.46       | -0.87           | 0.06    |
| Hs_12plexchip_6_6855  | v2HS_136098 | ATGGAGAAAGTCTGGATGTCCT | NM_001100407 | C17orf62  | chromosome 17 open reading frame 62 (C17orf62), transcript variant 1, mRNA                      | -0.94         | 0.28        | 0.62         | 1.38       | -1.56           | 0.18    |
| Hs_12plexchip_4_3073  | v2HS_221254 | TTGGTGTACTTGTAAAGTCGGC | NM_181707    | C17orf64  | chromosome 17 open reading frame 64 (C17orf64), mRNA                                            | -1.32         | 1.47        | 0.15         | 0.58       | -1.47           | 0.22    |
| Hs_12plexchip_5_11737 | v2HS_274367 | ATCAGAGGACATATAATAGGG  | NM_025099    | C17orf68  | chromosome 17 open reading frame 68 (C17orf68), mRNA                                            | -0.91         | 1.62        | 0.62         | 1.02       | -1.52           | 0.25    |

| Probe ID              | v2HS        | Sequence               | Accession    | Symbol    | Gene Name                                                                    | Mut log2 mean | Mut log2 SD | WT log2 Mean | WT log2 SD | log2 difference | P-value |
|-----------------------|-------------|------------------------|--------------|-----------|------------------------------------------------------------------------------|---------------|-------------|--------------|------------|-----------------|---------|
| Hs_12plexchip_5_4278  | v2HS_255961 | TAAAGGTCAAATGAGTTGTGGG | NM_203415    | C17orf81  | chromosome 17 open reading frame 81 (C17orf81), transcript variant 4, mRNA   | -2.38         | 1.10        | -1.06        | 0.88       | -1.32           | 0.18    |
| Hs_12plexchip_6_5550  | v2HS_160761 | AATTACTACCACTCAGGGTGCA | NM_173529    | C18orf54  | chromosome 18 open reading frame 54 (C18orf54), mRNA                         | -1.01         | 0.27        | -0.12        | 0.79       | -0.88           | 0.18    |
| Hs_12plexchip_5_12662 | v2HS_23231  | TTATAAGACAATTTATCAGGCA | NM_134447    | C19orf2   | chromosome 19 open reading frame 2 (C19orf2), transcript variant 2, mRNA     | -3.13         | 0.71        | 0.04         | 1.96       | -3.16           | 0.09    |
| Hs_12plexchip_2_1809  | v2HS_87088  | TTAAATACTCAGAACGACTCTC | AF218008     | C19ORF28  | HYPOTHETICAL PROTEIN PP3501                                                  | -0.74         | 0.06        | 0.14         | 0.87       | -0.88           | 0.22    |
| Hs_12plexchip_6_10344 | v2HS_191151 | TTTATTGTGGGAGGTGTCTGGA | NM_001100419 | C19orf60  | chromosome 19 open reading frame 60 (C19orf60), transcript variant 2, mRNA   | -0.91         | 0.67        | -0.15        | 0.71       | -0.76           | 0.25    |
| Hs_12plexchip_6_2827  | v2HS_177170 | TTCAGTGATGGTCTCCATGCT  | NM_014388    | C1orf107  | chromosome 1 open reading frame 107 (C1orf107), mRNA                         | -2.82         | 0.64        | -1.27        | 1.23       | -1.55           | 0.15    |
| Hs_12plexchip_4_10615 | v2HS_174325 | TTTCATCTTCAGGTACCACCGG | NM_017887    | C1orf123  | chromosome 1 open reading frame 123 (C1orf123), mRNA                         | -1.01         | 0.66        | 0.38         | 0.96       | -1.39           | 0.12    |
| Hs_12plexchip_5_11563 | v2HS_272110 | TTGCTCTGATACTCAATGAGCT | NM_030933    | C1orf14   | chromosome 1 open reading frame 14 (C1orf14), mRNA                           | -1.27         | 0.14        | 0.13         | 0.76       | -1.40           | 0.08    |
| Hs_12plexchip_5_10776 | v2HS_274065 | TAATCCCAGGAATGGTTCTCAG | NM_018150    | C1orf164  | chromosome 1 open reading frame 164 (C1orf164), mRNA                         | -0.73         | 0.72        | 0.01         | 0.57       | -0.74           | 0.24    |
| Hs_12plexchip_3_416   | v2HS_44665  | ATTGTAATCCACAGTGGAGGG  | NM_001110533 | C1orf177  | chromosome 1 open reading frame 177 (C1orf177), transcript variant 2, mRNA   | -0.79         | 0.63        | 0.19         | 0.41       | -0.98           | 0.10    |
| Hs0P00006974          | v2HS_104041 | TTGCTGAGAGATTGGGCCCGGG | NM_199351    | C1orf32   | chromosome 1 open reading frame 32 (C1orf32), mRNA                           | -0.85         | 0.26        | 0.10         | 0.60       | -0.95           | 0.10    |
| Hs_12plexchip_3_5773  | v2HS_226812 | ATAATCTCAAGTATCCCATCCG | NM_001080494 | C1orf34   | chromosome 1 open reading frame 34 (C1orf34), mRNA                           | -0.73         | 0.34        | 0.04         | 0.50       | -0.76           | 0.10    |
| Hs_12plexchip_6_8708  | v2HS_92022  | ATCTAACTCTGAGGAGTGGC   | AK023774     | C1ORF63   | CHROMOSOME 1 OPEN READING FRAME 63                                           | -0.81         | 0.65        | 0.04         | 0.29       | -0.85           | 0.14    |
| Hs_12plexchip_2_7945  | v2HS_156526 | TTTACCAGTGACATCTTGACCC | NM_018252    | C1orf75   | chromosome 1 open reading frame 75 (C1orf75), mRNA                           | -0.72         | 0.28        | 0.70         | 0.42       | -1.43           | 0.01    |
| Hs_12plexchip_2_5405  | v2HS_183364 | TTAGTTACTCTCTTCCCTCCA  | NM_017896    | C20orf11  | chromosome 20 open reading frame 11 (C20orf11), mRNA                         | -1.43         | 0.80        | -0.61        | 0.32       | -0.82           | 0.21    |
| Hs_12plexchip_4_5204  | v2HS_17999  | TGTAGATTCATCCAGTCTCTC  | NM_024331    | C20orf121 | chromosome 20 open reading frame 121 (C20orf121), transcript variant 1, mRNA | -2.93         | 0.22        | 0.05         | 0.60       | -2.98           | 0.01    |
| Hs_12plexchip_2_5436  | v2HS_183424 | ATTGCATTGGGTGGGATGGC   | NM_080829    | C20orf175 | chromosome 20 open reading frame 175 (C20orf175), mRNA                       | -1.34         | 1.02        | -0.32        | 0.59       | -1.02           | 0.23    |
| Hs_12plexchip_4_91    | v2HS_193993 | ATTTCTCGATCTACAGATCCA  | NR_003678    | C20orf191 | chromosome 20 open reading frame 191 (C20orf191) on chromosome 20            | -0.77         | 0.73        | 0.25         | 0.72       | -1.02           | 0.16    |
| Hs_12plexchip_3_4330  | v2HS_39233  | AATCCATTCCGATTCTGAGGA  | NM_020356    | C20orf32  | chromosome 20 open reading frame 32 (C20orf32), mRNA                         | -0.91         | 0.55        | 0.09         | 0.95       | -1.00           | 0.21    |
| Hs_12plexchip_3_8814  | v2HS_96769  | TTCAAAGAAGAGGGCGCTGGCT | NM_015511    | C20orf4   | chromosome 20 open reading frame 4 (C20orf4), mRNA                           | -1.48         | 0.98        | -0.19        | 0.38       | -1.30           | 0.14    |
| Hs_12plexchip_4_368   | v2HS_96771  | TTCAGAGGAAATATGGTTGCCG | NM_015511    | C20orf4   | chromosome 20 open reading frame 4 (C20orf4), mRNA                           | -1.46         | 0.45        | -0.73        | 0.59       | -0.73           | 0.17    |
| Hs_12plexchip_2_12385 | v2HS_210503 | TAATCACAGACAATCATTGCA  | NM_022099    | C20ORF51  | CHROMOSOME 20 OPEN READING FRAME 51                                          | -0.97         | 0.67        | 0.28         | 1.19       | -1.25           | 0.21    |
| Hs0P00006727          | v2HS_102114 | TTATCCACGACATTGCTTAGGT | NM_080574    | C20orf70  | chromosome 20 open reading frame 70 (C20orf70), mRNA                         | -0.90         | 0.44        | 0.87         | 0.88       | -1.77           | 0.05    |
| Hs_12plexchip_5_9198  | v2HS_267872 | ATGAAAGACCAGCTAATCTGGA | XM_032945    | C21orf25  | chromosome 21 open reading frame 25 (C21orf25), mRNA                         | -0.88         | 0.34        | 0.92         | 0.70       | -1.80           | 0.03    |
| Hs_12plexchip_3_12552 | v2HS_244109 | TTGTAATCAAGATTCTGGGCG  | NM_018944    | C21orf45  | chromosome 21 open reading frame 45 (C21orf45), mRNA                         | -3.27         | 0.94        | -0.63        | 0.44       | -2.64           | 0.02    |
| Hs_12plexchip_4_11177 | v2HS_52006  | ATTTGTAATGCTTTCAAGACAT | NM_018944    | C21orf45  | chromosome 21 open reading frame 45 (C21orf45), mRNA                         | -1.04         | 0.73        | -0.01        | 0.63       | -1.03           | 0.14    |
| Hs_12plexchip_2_11284 | v2HS_47645  | TAAGGGATGGAGAGACAGCC   | NM_058188    | C21ORF67  | CHROMOSOME 21 OPEN READING FRAME 67                                          | -1.70         | 0.20        | -0.60        | 0.63       | -1.09           | 0.08    |
| Hs_12plexchip_6_6841  | v2HS_138230 | TTTCTCTGAGACGGACTGCGCC | NM_032266    | C2orf16   | chromosome 2 open reading frame 16 (C2orf16), mRNA                           | -1.08         | 1.04        | 0.18         | 1.09       | -1.27           | 0.22    |
| Hs_12plexchip_3_392   | v2HS_50725  | CTGAATAAGTCAAGATCTGCT  | NM_020194    | C2orf33   | chromosome 2 open reading frame 33 (C2orf33), mRNA                           | -0.78         | 0.14        | 0.82         | 0.55       | -1.59           | 0.03    |
| Hs_12plexchip_6_7110  | v2HS_35694  | GATGTAGTACACCTGGCGGCA  | NM_207307    | C3orf25   | chromosome 3 open reading frame 25 (C3orf25), mRNA                           | -1.61         | 0.38        | -0.21        | 0.45       | -1.40           | 0.02    |
| Hs_12plexchip_2_5508  | v2HS_178979 | TATGTAATCATTCAAGCTGGT  | NM_173657    | C3orf33   | chromosome 3 open reading frame 33 (C3orf33), mRNA                           | -0.74         | 0.30        | 0.71         | 0.34       | -1.45           | 0.01    |
| Hs_12plexchip_6_6588  | v2HS_258225 | TAGCACCATACCAGTGGGCA   | NM_178344    | C3ORF35   | CHROMOSOME 3 OPEN READING FRAME 35                                           | -1.56         | 0.79        | -0.71        | 0.48       | -0.85           | 0.20    |
| Hs_12plexchip_5_7316  | v2HS_119846 | ATTGTGTGACATATCATCTGCA | BC029129     | C3ORF55   | CHROMOSOME 3 OPEN READING FRAME 55                                           | -2.22         | 0.27        | -1.15        | 1.11       | -1.07           | 0.23    |



| Probe ID              | v2HS        | Sequence                | Accession    | Symbol   | Gene Name                                                                                              | Mut log2 mean | Mut log2 SD | WT log2 Mean | WT log2 SD | log2 difference | P-value |
|-----------------------|-------------|-------------------------|--------------|----------|--------------------------------------------------------------------------------------------------------|---------------|-------------|--------------|------------|-----------------|---------|
| Hs_12plexchip_6_9716  | v2HS_210368 | TTAGGGATTATTACAGTTGGG   | AB000464     | C4ORF10  | CHROMOSOME 4 OPEN READING FRAME 10                                                                     | -0.87         | 0.22        | -0.10        | 0.44       | -0.76           | 0.08    |
| Hs_12plexchip_6_6858  | v2HS_160120 | ATTATTCTAGCAAACACACGG   | NM_033211    | C5orf30  | chromosome 5 open reading frame 30 (C5orf30), mRNA                                                     | -0.85         | 0.52        | 0.28         | 0.38       | -1.13           | 0.04    |
| Hs_12plexchip_6_8467  | v2HS_284705 | TTGGGCCTGTACATAATATGGT  | NM_001001343 | C5orf40  | chromosome 5 open reading frame 40 (C5orf40), mRNA                                                     | -1.08         | 0.05        | 0.12         | 0.21       | -1.20           | 0.01    |
| Hs_12plexchip_4_8659  | v2HS_89094  | TTTGTGAGAGGCTTGAATGGCT  | NM_000065    | C6       | complement component 6 (C6), mRNA                                                                      | -1.21         | 0.45        | -0.06        | 0.59       | -1.15           | 0.06    |
| Hs_12plexchip_6_11217 | v2HS_260682 | TAATATGACAGGTTGGTGACGT  | NM_183373    | C6orf145 | chromosome 6 open reading frame 145 (C6orf145), mRNA                                                   | -1.14         | 0.95        | 0.66         | 1.73       | -1.80           | 0.21    |
| Hs_12plexchip_6_4278  | v2HS_181637 | TTCCAATTTGTCTATGATCCCA  | AK092941     | C6ORF163 | CHROMOSOME 6 OPEN READING FRAME 163                                                                    | -0.72         | 0.28        | 0.66         | 0.91       | -1.38           | 0.11    |
| Hs_12plexchip_6_1960  | v2HS_154208 | TTGTAAGTCTTAGGATATGCC   | NM_001040437 | C6orf48  | chromosome 6 open reading frame 48 (C6orf48), transcript variant 1, mRNA                               | -1.20         | 0.13        | 0.02         | 0.34       | -1.22           | 0.01    |
| Hs_12plexchip_3_9395  | v2HS_136777 | ATTAAATCTTCATCTGATGCCT  | NM_025059    | C6orf97  | chromosome 6 open reading frame 97 (C6orf97), mRNA                                                     | -0.73         | 0.35        | 0.18         | 0.52       | -0.91           | 0.08    |
| Hs_12plexchip_6_10204 | v2HS_111565 | TTTGCTTCTCTCATCTTGAGCA  | NM_000587    | C7       | complement component 7 (C7), mRNA                                                                      | -1.04         | 0.99        | -0.21        | 0.11       | -0.83           | 0.28    |
| Hs_12plexchip_6_3737  | v2HS_174884 | ATTGAGACTGAGATATTCACCG  | NM_017994    | C7orf42  | chromosome 7 open reading frame 42 (C7orf42), mRNA                                                     | -1.40         | 0.67        | 0.10         | 0.84       | -1.50           | 0.08    |
| Hs_12plexchip_5_9235  | v2HS_93686  | TTTGCTTTGTCAATCACCAGGA  | NM_000562    | C8A      | complement component 8, alpha polypeptide (C8A), mRNA                                                  | -0.75         | 0.14        | -0.03        | 0.64       | -0.72           | 0.19    |
| Hs_12plexchip_3_11257 | v2HS_140412 | TTAACATCTGGTTGGAGCGGC   | NM_053279    | C8orf13  | chromosome 8 open reading frame 13 (C8orf13), mRNA                                                     | -0.72         | 0.85        | 0.31         | 0.69       | -1.02           | 0.18    |
| Hs_12plexchip_2_9108  | v2HS_21213  | TAAATAACCTTCATAATCCCGT  | NM_152416    | C8orf38  | chromosome 8 open reading frame 38 (C8orf38), mRNA                                                     | -0.78         | 0.59        | 0.22         | 0.76       | -1.00           | 0.15    |
| Hs_12plexchip_6_1360  | v2HS_166148 | TACACGTAGGAGACGATCTGGT  | NM_001081675 | C8ORFK36 | hypothetical protein LOC340359 (C8ORFK36), mRNA                                                        | -1.90         | 1.54        | 0.25         | 1.90       | -2.15           | 0.21    |
| Hs_12plexchip_6_8721  | v2HS_115684 | TTTGGAGACAAGTCTGGTGGCG  | NM_016390    | C9orf114 | chromosome 9 open reading frame 114 (C9orf114), mRNA                                                   | -1.66         | 1.00        | -0.32        | 1.34       | -1.34           | 0.24    |
| Hs_12plexchip_5_9018  | v2HS_228046 | TATTGCATTGGGACGATGAGGG  | NM_016481    | C9orf156 | chromosome 9 open reading frame 156 (C9orf156), mRNA                                                   | -2.06         | 0.58        | -1.27        | 0.52       | -0.79           | 0.16    |
| Hs_12plexchip_5_4096  | v2HS_87013  | TTTAGCAATGCAGAACTTGCA   | NM_148179    | C9orf23  | chromosome 9 open reading frame 23 (C9orf23), transcript variant 2, mRNA                               | -2.09         | 0.72        | 0.25         | 0.22       | -2.34           | 0.02    |
| Hs_12plexchip_3_721   | v2HS_46516  | ATGTAGTTCAAAGTACGTTTCT  | XM_937019    | C9orf57  | PREDICTED:chromosome 9 open reading frame 57 (C9orf57), mRNA                                           | -1.79         | 0.61        | -0.95        | 0.92       | -0.84           | 0.27    |
| Hs_12plexchip_6_9509  | v2HS_221684 | TTCCAATTCAGTGAGTGCCG    | NM_017985    | C9ORF68  | CHROMOSOME 9 OPEN READING FRAME 68                                                                     | -0.91         | 1.30        | 0.58         | 0.60       | -1.49           | 0.17    |
| Hs_12plexchip_6_10789 | v2HS_160717 | TTTCCAGATTAATCAACAAGGCT | NM_173521    | C9orf84  | chromosome 9 open reading frame 84 (C9orf84), transcript variant 1, mRNA                               | -1.05         | 0.60        | 0.93         | 1.25       | -1.99           | 0.09    |
| Hs_12plexchip_4_2803  | v2HS_186977 | TTTGCTCTTATCCCGTGGGCT   | NM_173550    | C9orf93  | chromosome 9 open reading frame 93 (C9orf93), mRNA                                                     | -2.17         | 0.76        | -0.82        | 0.53       | -1.35           | 0.07    |
| Hs_12plexchip_5_7273  | v2HS_263904 | TTTCTCTACAACCTTGATCCT   | NM_206925    | CA12     | carbonic anhydrase XII (CA12), transcript variant 2, mRNA                                              | -1.59         | 0.07        | -0.27        | 0.15       | -1.32           | 0.00    |
| Hs_12plexchip_5_8963  | v2HS_228448 | ATACCCTTCAACATATCCAGGT  | NM_016289    | CAB39    | calcium binding protein 39 (CAB39), mRNA                                                               | -0.98         | 0.60        | -0.22        | 0.50       | -0.76           | 0.17    |
| Hs_12plexchip_5_12635 | v2HS_248549 | TTTAGAAATGGGAGGACCAGCC  | NM_006030    | CACNA2D2 | calcium channel, voltage-dependent, alpha 2/delta subunit 2 (CACNA2D2), transcript variant 2, mRNA     | -1.16         | 0.27        | 0.07         | 0.30       | -1.23           | 0.01    |
| Hs_12plexchip_5_8200  | v2HS_112245 | ATAACCTTTCAGAGAGGGTCCC  | NM_000725    | CACNB3   | calcium channel, voltage-dependent, beta 3 subunit (CACNB3), mRNA                                      | -1.17         | 0.92        | 0.99         | 1.53       | -2.16           | 0.12    |
| Hs_12plexchip_4_12251 | v2HS_225162 | TTAGCAGACAAATACTGTGCT   | NM_001005747 | CACNB4   | calcium channel, voltage-dependent, beta 4 subunit (CACNB4), transcript variant 1, mRNA                | -1.18         | 0.71        | -0.26        | 0.51       | -0.92           | 0.15    |
| Hs_12plexchip_4_10665 | v2HS_158576 | TTGAAATAAGGAGTCTGTGGG   | NM_031896    | CACNG7   | calcium channel, voltage-dependent, gamma subunit 7 (CACNG7), mRNA                                     | -0.97         | 0.55        | -0.16        | 0.41       | -0.81           | 0.11    |
| Hs_12plexchip_4_10283 | v2HS_158567 | TTCTCTGGACTGTAGACGC     | NM_031895    | CACNG8   | calcium channel, voltage-dependent, gamma subunit 8 (CACNG8), mRNA                                     | -0.72         | 0.82        | 0.14         | 0.47       | -0.86           | 0.21    |
| Hs_12plexchip_3_9987  | v2HS_130329 | TTGCTTGGCCACTGTGTTGCC   | NM_033429    | CALML4   | calmodulin-like 4 (CALML4), transcript variant 1, mRNA                                                 | -0.92         | 0.59        | -0.12        | 0.26       | -0.81           | 0.13    |
| Hs_12plexchip_4_9782  | v2HS_15097  | TTGTATTCTGAGTCTCCGTGCA  | NM_004343    | CALR     | calreticulin (CALR), mRNA                                                                              | -2.33         | 0.73        | -0.50        | 0.86       | -1.82           | 0.05    |
| Hs_12plexchip_6_936   | v2HS_112696 | TTTATTGATGAGGCTTTGGCT   | NM_172127    | CAMK2D   | calcium/calmodulin-dependent protein kinase (CaM kinase) II delta (CAMK2D), transcript variant 1, mRNA | -1.34         | 0.51        | -0.64        | 0.24       | -0.70           | 0.13    |
| HsOP00002217          | v2HS_98761  | TACATGATGACTCCAATGCCCC  | NM_024046    | CAMKV    | CAM KINASE-LIKE VESICLE-ASSOCIATED                                                                     | -2.15         | 0.68        | -1.01        | 0.80       | -1.14           | 0.13    |
| Hs_12plexchip_5_5676  | v2HS_88963  | CAAACCTATGAGTTGGACAGCC  | NM_173089    | CAPN3    | calpain 3, (p94) (CAPN3), transcript variant 5, mRNA                                                   | -0.95         | 0.54        | 0.01         | 0.40       | -0.95           | 0.08    |

| Probe ID              | v2HS        | Sequence               | Accession    | Symbol   | Gene Name                                                                                                 | Mut log2 mean | Mut log2 SD | WT log2 Mean | WT log2 SD | log2 difference | P-value |
|-----------------------|-------------|------------------------|--------------|----------|-----------------------------------------------------------------------------------------------------------|---------------|-------------|--------------|------------|-----------------|---------|
| Hs_12plexchip_4_6885  | v2HS_62217  | TTCTTTGATCCATCTCCAGCCT | NM_004930    | CAPZB    | capping protein (actin filament) muscle Z-line, beta (CAPZB), mRNA                                        | -0.81         | 0.28        | -0.02        | 0.24       | -0.79           | 0.02    |
| Hs_12plexchip_5_2517  | v2HS_212329 | CTCCTCAAGCACAGGACAAGGG | NM_014316    | CARHSP1  | CALCIUM REGULATED HEAT STABLE PROTEIN 1, 24KDA                                                            | -1.51         | 1.70        | 0.59         | 1.41       | -2.10           | 0.18    |
| Hs_12plexchip_5_4216  | v2HS_256535 | ATTGGAATGGGATTCTATCCT  | NM_199141    | CARM1    | coactivator-associated arginine methyltransferase 1 (CARM1), mRNA                                         | -1.52         | 0.55        | -0.23        | 0.22       | -1.29           | 0.04    |
| Hs_12plexchip_4_10865 | v2HS_38737  | ATAGACAAAGGATTGACAGGC  | NM_144508    | CASC5    | cancer susceptibility candidate 5 (CASC5), transcript variant 2, mRNA                                     | -1.59         | 0.44        | -0.46        | 0.16       | -1.13           | 0.03    |
| Hs_12plexchip_5_7843  | v2HS_112746 | ATACAGGATTAGAGAGAGTGGG | NM_001231    | CASQ1    | calsequestrin 1 (fast-twitch, skeletal muscle) (CASQ1), nuclear gene encoding mitochondrial protein, mRNA | -0.82         | 0.45        | 0.17         | 0.38       | -0.99           | 0.05    |
| Hs_12plexchip_5_5327  | v2HS_88343  | ATAGTGGGATAAATTCTCACCG | NM_053054    | CATSPER1 | cation channel, sperm associated 1 (CATSPER1), mRNA                                                       | -1.93         | 0.38        | -0.32        | 0.64       | -1.61           | 0.03    |
| Hs_12plexchip_3_3527  | v2HS_48406  | TTATTGTGAGGGATTGTCTGGA | NM_005188    | CBL      | Cas-Br-M (murine) ecotropic retroviral transforming sequence (CBL), mRNA                                  | -1.33         | 0.39        | -0.51        | 0.30       | -0.82           | 0.05    |
| Hs_12plexchip_4_7111  | v2HS_72019  | ATAACTCAGGAGTGGGTCATCC | NM_080617    | CBLN4    | cerebellin 4 precursor (CBLN4), mRNA                                                                      | -0.81         | 1.17        | 1.15         | 1.94       | -1.96           | 0.22    |
| Hs_12plexchip_5_8103  | v2HS_112767 | TTCATTATCGGCAGTAACTCGT | NM_001236    | CBR3     | carbonyl reductase 3 (CBR3), mRNA                                                                         | -0.79         | 0.37        | 0.07         | 0.40       | -0.86           | 0.05    |
| Hs_12plexchip_5_7130  | v2HS_88903  | TTTGCCTTTAATCCACTCTGCG | NM_000071    | CBS      | cystathionine-beta-synthase (CBS), mRNA                                                                   | -0.87         | 0.35        | 0.32         | 0.39       | -1.19           | 0.02    |
| Hs_12plexchip_5_139   | v2HS_245413 | TTAGCTCTTCATATATCAACCT | NM_152549    | CCDC112  | coiled-coil domain containing 112 (CCDC112), transcript variant 2, mRNA                                   | -1.58         | 0.19        | 0.09         | 0.35       | -1.67           | 0.01    |
| Hs_12plexchip_6_2225  | v2HS_33560  | ATAGTCCAAGAGGAAGTCTCCA | NM_033626    | CCDC120  | coiled-coil domain containing 120 (CCDC120), mRNA                                                         | -1.36         | 0.43        | -0.28        | 0.41       | -1.08           | 0.03    |
| Hs0P00003928          | v2HS_35985  | TTTCTATTCTTTACTGGCCA   | NM_144982    | CCDC131  | coiled-coil domain containing 131 (CCDC131), mRNA                                                         | -0.86         | 0.23        | 0.16         | 0.31       | -1.02           | 0.01    |
| Hs_12plexchip_3_8644  | v2HS_98369  | TTTGGTAAGGTTATCCAGGC   | NM_022757    | CCDC14   | coiled-coil domain containing 14 (CCDC14), mRNA                                                           | -1.64         | 0.64        | -0.82        | 0.27       | -0.82           | 0.14    |
| Hs_12plexchip_6_6684  | v2HS_157109 | AATGTCACACAGGTGACAGGG  | NM_024661    | CCDC51   | coiled-coil domain containing 51 (CCDC51), mRNA                                                           | -1.32         | 0.94        | -0.55        | 0.54       | -0.77           | 0.30    |
| Hs_12plexchip_6_180   | v2HS_53593  | TTAGAATCACAGTCCAACAGTC | AF161533     | CCDC82   | HYPOTHETICAL PROTEIN FLJ23518                                                                             | -1.80         | 0.94        | -0.76        | 0.63       | -1.04           | 0.20    |
| Hs0P00010500          | v2HS_178798 | TTTCTGTTGTGTCAAGTGGCCG | NM_173618    | CCDC95   | coiled-coil domain containing 95 (CCDC95), mRNA                                                           | -1.79         | 0.06        | -1.00        | 0.84       | -0.79           | 0.24    |
| Hs_12plexchip_6_4338  | v2HS_176445 | TTTATGGACTCCTGGTGGGCA  | NM_001105564 | CCHCR1   | coiled-coil alpha-helical rod protein 1 (CCHCR1), transcript variant 1, mRNA                              | -0.70         | 0.32        | 1.04         | 0.67       | -1.74           | 0.03    |
| Hs0P00003883          | v2HS_197544 | TAATGCATTACTATTCTCCC   | NM_005893    | CCIN     | CALICIN                                                                                                   | -1.41         | 0.91        | 0.25         | 0.62       | -1.66           | 0.07    |
| Hs_12plexchip_4_500   | v2HS_112771 | TTTGCTTTCCAAGGAGGAACGG | NM_001237    | CCNA2    | cyclin A2 (CCNA2), mRNA                                                                                   | -1.84         | 0.56        | -0.65        | 0.58       | -1.19           | 0.06    |
| Hs0P00010228          | v2HS_150278 | ATTTGTTCCATATTGACAGCA  | NM_001759    | CCND2    | CYCLIN D2                                                                                                 | -1.04         | 0.61        | -0.13        | 0.79       | -0.92           | 0.19    |
| Hs_12plexchip_3_10101 | v2HS_235350 | ATTGTGAGGAATACAGGAGGA  | NM_178445    | CCRL1    | chemokine (C-C motif) receptor-like 1 (CCRL1), transcript variant 1, mRNA                                 | -1.21         | 0.30        | -0.39        | 0.17       | -0.83           | 0.02    |
| Hs_12plexchip_4_1037  | v2HS_198914 | TATCCATGCTTAAAGAACGT   | NM_006431    | CCT2     | chaperonin containing TCP1, subunit 2 (beta) (CCT2), mRNA                                                 | -2.09         | 0.48        | -0.86        | 0.26       | -1.24           | 0.03    |
| Hs_12plexchip_5_6818  | v2HS_199868 | ATTGGTTACCATAAGAGAGGCA | NM_006431    | CCT2     | chaperonin containing TCP1, subunit 2 (beta) (CCT2), mRNA                                                 | -0.74         | 0.40        | 0.13         | 0.44       | -0.87           | 0.07    |
| Hs_12plexchip_6_9240  | v2HS_206188 | CATCGGAAGCAAACAAATGGA  | NM_001008883 | CCT3     | chaperonin containing TCP1, subunit 3 (gamma) (CCT3), transcript variant 2, mRNA                          | -4.76         | 0.37        | -0.97        | 3.04       | -3.79           | 0.16    |
| Hs_12plexchip_4_8509  | v2HS_150300 | ATATAAAGTCTGCATGTCCC   | NM_001762    | CCT6A    | chaperonin containing TCP1, subunit 6A (zeta 1) (CCT6A), transcript variant 1, mRNA                       | -0.85         | 0.98        | 0.02         | 0.76       | -0.88           | 0.29    |
| Hs_12plexchip_5_2555  | v2HS_252764 | ATTCATAACCTTCTATGACCT  | NM_006585    | CCT8     | chaperonin containing TCP1, subunit 8 (theta) (CCT8), mRNA                                                | -0.80         | 0.05        | 0.56         | 0.29       | -1.36           | 0.01    |
| Hs_12plexchip_3_5587  | v2HS_226879 | ATTCTGTCITGGATCTTAGGCA | NM_001040021 | CD14     | CD14 molecule (CD14), transcript variant 2, mRNA                                                          | -1.37         | 0.18        | -0.63        | 0.31       | -0.74           | 0.03    |
| Hs_12plexchip_5_2308  | v2HS_253311 | ATAATAACTAGGTGCTGACCC  | NM_006566    | CD226    | CD226 molecule (CD226), mRNA                                                                              | -0.84         | 0.21        | 0.55         | 1.39       | -1.38           | 0.23    |
| Hs_12plexchip_3_1812  | v2HS_65350  | GTAGAGGTCAAAGTCAATGCGT | NM_006110    | CD2BP2   | CD2 (cytoplasmic tail) binding protein 2 (CD2BP2), mRNA                                                   | -0.76         | 0.80        | 0.25         | 0.80       | -1.02           | 0.19    |
| Hs_12plexchip_3_7175  | v2HS_95841  | AATAGGGAAGATACAGCAGGCA | NM_014880    | CD302    | CD302 molecule (CD302), mRNA                                                                              | -0.95         | 0.33        | -0.14        | 0.37       | -0.81           | 0.05    |
| Hs_12plexchip_5_12262 | v2HS_28520  | TAGATTTACCCAGGAACAGCT  | NM_012099    | CD3EAP   | CD3e molecule, epsilon associated protein (CD3EAP), mRNA                                                  | -1.24         | 0.87        | -0.39        | 0.38       | -0.85           | 0.23    |
| Hs_12plexchip_3_8773  | v2HS_229315 | AACAAGACACAAGGACTATCCC | AB209380     | CD81     | CD81 ANTIGEN (TARGET OF ANTIPROLIFERATIVE ANTIBODY 1)                                                     | -0.98         | 0.68        | 0.49         | 0.17       | -1.47           | 0.06    |
| Hs_12plexchip_3_9562  | v2HS_133577 | ATTTGGTGACTTTGATACAGGC | NM_002231    | CD82     | CD82 molecule (CD82), transcript variant 1, mRNA                                                          | -0.70         | 0.60        | 0.53         | 0.50       | -1.23           | 0.05    |

| Probe ID              | v2HS        | Sequence                | Accession    | Symbol  | Gene Name                                                                                                           | Mut log2 mean | Mut log2 SD | WT log2 Mean | WT log2 SD | log2 difference | P-value |
|-----------------------|-------------|-------------------------|--------------|---------|---------------------------------------------------------------------------------------------------------------------|---------------|-------------|--------------|------------|-----------------|---------|
| Hs_12plexchip_5_1764  | v2HS_212353 | TTTGCCTACTCACTCTATCTGTC | NM_198196    | CD96    | CD96 molecule (CD96), transcript variant 1, mRNA                                                                    | -0.81         | 0.28        | 0.51         | 0.23       | -1.32           | 0.00    |
| Hs_12plexchip_5_3556  | v2HS_254661 | TATTCTAATCCAATATACAGCA  | NM_001078645 | CDC16   | cell division cycle 16 homolog (S. cerevisiae) (CDC16), transcript variant 2, mRNA                                  | -1.51         | 0.17        | 0.03         | 0.17       | -1.54           | 0.00    |
| Hs_12plexchip_5_6669  | v2HS_262434 | TAACAACTCAACAGACTGGGC   | NM_021873    | CDC25B  | cell division cycle 25 homolog B (S. pombe) (CDC25B), transcript variant 1, mRNA                                    | -0.76         | 0.13        | 0.00         | 0.68       | -0.77           | 0.18    |
| Hs_12plexchip_5_3479  | v2HS_226246 | ATAATGATTCAAAGGGAGACCA  | NM_001256    | CDC27   | cell division cycle 27 homolog (S. cerevisiae) (CDC27), mRNA                                                        | -1.11         | 0.36        | 0.03         | 0.29       | -1.14           | 0.01    |
| Hs_12plexchip_4_269   | v2HS_24388  | TTTGGTTTCACCATAGCGAGGC  | NM_031267    | CDC2L5  | cell division cycle 2-like 5 (cholinesterase-related cell division controller) (CDC2L5), transcript variant 2, mRNA | -0.81         | 0.42        | 0.24         | 0.16       | -1.05           | 0.04    |
| Hs_12plexchip_6_847   | v2HS_24391  | ATAGTTGTGCATCTTTGCTGGC  | NM_031267    | CDC2L5  | cell division cycle 2-like 5 (cholinesterase-related cell division controller) (CDC2L5), transcript variant 2, mRNA | -0.96         | 0.41        | 0.71         | 1.42       | -1.67           | 0.17    |
| Hs0P00000385          | v2HS_24387  | ATTTCCAATGAAACTACGTCGT  | NM_003718    | CDC2L5  | CELL DIVISION CYCLE 2-LIKE 5 (CHOLINESTERASE-RELATED CELL DIVISION CONTROLLER)                                      | -0.74         | 0.16        | 0.67         | 0.69       | -1.41           | 0.07    |
| Hs_12plexchip_4_2491  | v2HS_174475 | AATAAACTGCATTACAACAGCT  | NM_017913    | CDC37L1 | cell division cycle 37 homolog (S. cerevisiae)-like 1 (CDC37L1), mRNA                                               | -0.97         | 0.56        | -0.06        | 0.18       | -0.90           | 0.10    |
| Hs_12plexchip_4_9521  | v2HS_172576 | TTAATGAGTAATTTGATCTGGG  | NM_003504    | CDC45L  | CDC45 cell division cycle 45-like (S. cerevisiae) (CDC45L), mRNA                                                    | -1.57         | 0.36        | -0.69        | 0.09       | -0.88           | 0.05    |
| Hs_12plexchip_5_7026  | v2HS_262205 | TTCAGCTCAATTAAGGAGGT    | NM_003504    | CDC45L  | CDC45 cell division cycle 45-like (S. cerevisiae) (CDC45L), mRNA                                                    | -1.57         | 0.69        | -0.04        | 1.08       | -1.53           | 0.12    |
| Hs0P00008651          | v2HS_112872 | TTTAGACACTCTAGCTCCGGG   | NM_001253    | CDC5L   | CDC5 CELL DIVISION CYCLE 5-LIKE (S. POMBE)                                                                          | -0.70         | 0.80        | 0.32         | 0.14       | -1.02           | 0.15    |
| Hs_12plexchip_3_9508  | v2HS_136197 | ATAATTCAGAATCTCAAGTGCG  | NM_024529    | CDC73   | cell division cycle 73, Paf1/RNA polymerase II complex component, homolog (S. cerevisiae) (CDC73), mRNA             | -2.05         | 0.45        | -0.14        | 0.71       | -1.91           | 0.02    |
| Hs_12plexchip_5_10993 | v2HS_235686 | TTTCCATTACAGACTAGAAGGC  | NM_024529    | CDC73   | cell division cycle 73, Paf1/RNA polymerase II complex component, homolog (S. cerevisiae) (CDC73), mRNA             | -2.51         | 0.80        | -0.39        | 0.75       | -2.12           | 0.03    |
| Hs_12plexchip_5_11993 | v2HS_272144 | TTAAGTAATGCTAATTTAACCA  | NM_024529    | CDC73   | cell division cycle 73, Paf1/RNA polymerase II complex component, homolog (S. cerevisiae) (CDC73), mRNA             | -4.70         | 1.03        | -0.63        | 0.30       | -4.08           | 0.01    |
| Hs_12plexchip_5_7017  | v2HS_99464  | TAGTACCTTGCTGCTGTTTGGT  | NM_031299    | CDCA3   | cell division cycle associated 3 (CDCA3), mRNA                                                                      | -0.75         | 0.88        | 0.80         | 0.61       | -1.54           | 0.08    |
| Hs_12plexchip_4_10431 | v2HS_155714 | AATTTCCACTAAGTGGGAGGT   | NM_018101    | CDCA8   | cell division cycle associated 8 (CDCA8), mRNA                                                                      | -2.01         | 0.82        | -0.03        | 0.27       | -1.98           | 0.04    |
| Hs_12plexchip_5_6926  | v2HS_262071 | ATAACAAATACCACAGAGGCC   | NM_018101    | CDCA8   | cell division cycle associated 8 (CDCA8), mRNA                                                                      | -1.20         | 0.38        | 0.13         | 0.78       | -1.33           | 0.08    |
| Hs_12plexchip_4_8826  | v2HS_150461 | TTTGTGACTCGGAAGAAGTGGC  | NM_001795    | CDH5    | cadherin 5, type 2, VE-cadherin (vascular epithelium) (CDH5), mRNA                                                  | -1.57         | 0.99        | 0.65         | 1.16       | -2.22           | 0.07    |
| Hs_12plexchip_3_6480  | v2HS_112920 | TTCTAACGGACCAAACTGTGCC  | NM_001261    | CDK9    | cyclin-dependent kinase 9 (CDK9), mRNA                                                                              | -0.90         | 0.81        | -0.03        | 0.51       | -0.87           | 0.20    |
| Hs_12plexchip_3_12615 | v2HS_33603  | ATTCAAACACAGGTGAAGCCT   | NM_004196    | CDKL1   | cyclin-dependent kinase-like 1 (CDC2-related kinase) (CDKL1), mRNA                                                  | -0.91         | 0.38        | -0.08        | 0.38       | -0.83           | 0.06    |
| Hs_12plexchip_4_182   | v2HS_134767 | ATGATCATAAGCCAAAGCCC    | NM_016508    | CDKL3   | cyclin-dependent kinase-like 3 (CDKL3), mRNA                                                                        | -1.30         | 1.14        | 0.67         | 0.74       | -1.97           | 0.08    |
| Hs_12plexchip_5_6683  | v2HS_134769 | ATTTGAACTGAGATTGCAGCC   | NM_016508    | CDKL3   | cyclin-dependent kinase-like 3 (CDKL3), mRNA                                                                        | -0.85         | 0.42        | 0.23         | 0.24       | -1.08           | 0.03    |
| Hs_12plexchip_5_12702 | v2HS_254033 | TTTCTTCATCATCAGACTCCGG  | NM_005760    | CEBPZ   | CCAAT/enhancer binding protein zeta (CEBPZ), mRNA                                                                   | -0.88         | 0.41        | 0.46         | 1.32       | -1.34           | 0.21    |
| Hs_12plexchip_2_7527  | v2HS_154324 | AACTTCTGAGCTACTTCCTGGT  | NM_177405    | CECR1   | cat eye syndrome chromosome region, candidate 1 (CECR1), transcript variant 2, mRNA                                 | -0.74         | 0.40        | 0.32         | 0.31       | -1.07           | 0.03    |
| Hs_12plexchip_4_7607  | v2HS_150546 | TATCACTGAGGTATCTTGGGCC  | NM_001813    | CENPE   | centromere protein E, 312kDa (CENPE), mRNA                                                                          | -2.78         | 0.92        | -1.83        | 0.91       | -0.95           | 0.27    |
| Hs0P00009414          | v2HS_135881 | TTGGCAATACATGCTTTCACGC  | NM_024322    | CENPO   | centromere protein O (CENPO), mRNA                                                                                  | -0.73         | 0.06        | 0.17         | 0.35       | -0.90           | 0.05    |
| Hs_12plexchip_4_7048  | v2HS_64314  | ATAGGTTGCATCATAGAGGCCA  | NM_005507    | CFL1    | cofilin 1 (non-muscle) (CFL1), mRNA                                                                                 | -1.51         | 0.51        | 0.09         | 1.93       | -1.60           | 0.29    |
| Hs_12plexchip_6_506   | v2HS_68418  | TTAAAGGGCAGATTCATATGCG  | NM_005483    | CHAF1A  | chromatin assembly factor 1, subunit A (p150) (CHAF1A), mRNA                                                        | -1.43         | 0.22        | -0.46        | 1.07       | -0.98           | 0.25    |

| Probe ID              | v2HS        | Sequence               | Accession    | Symbol  | Gene Name                                                                                     | Mut log2 mean | Mut log2 SD | WT log2 Mean | WT log2 SD | log2 difference | P-value |
|-----------------------|-------------|------------------------|--------------|---------|-----------------------------------------------------------------------------------------------|---------------|-------------|--------------|------------|-----------------|---------|
| Hs_12plexchip_4_6562  | v2HS_68534  | TTTGAGGTAGAGCTTGTGCCT  | NM_017780    | CHD7    | chromodomain helicase DNA binding protein 7 (CHD7), mRNA                                      | -1.13         | 1.11        | 0.16         | 1.01       | -1.29           | 0.21    |
| Hs0P00000804          | v2HS_59813  | TTGATTACAATATCCTGGCTT  | NM_014043    | CHMP2B  | chromatin modifying protein 2B (CHMP2B), mRNA                                                 | -0.97         | 1.63        | 1.21         | 1.51       | -2.18           | 0.16    |
| Hs_12plexchip_6_10314 | v2HS_150582 | TTAGATGTGCCATGAGGTACCG | NM_001025201 | CHN1    | chimerin (chimaerin) 1 (CHN1), transcript variant 2, mRNA                                     | -1.32         | 0.62        | -0.21        | 0.53       | -1.11           | 0.08    |
| Hs_12plexchip_5_8714  | v2HS_226214 | TATTACTTAGGCCTCATCGGC  | NM_000750    | CHRN4   | cholinergic receptor, nicotinic, beta 4 (CHRN4), mRNA                                         | -0.76         | 0.40        | 1.70         | 0.41       | -2.46           | 0.00    |
| Hs_12plexchip_6_2469  | v2HS_81221  | GTAGTAGAAGTCGTAGGTGCGC | NM_022467    | CHST8   | carbohydrate (N-acetyl)galactosamine 4-0) sulfotransferase 8 (CHST8), mRNA                    | -1.47         | 0.42        | -0.26        | 1.42       | -1.21           | 0.27    |
| Hs_12plexchip_4_11313 | v2HS_63199  | AATACAGGTGATGCCATATCCA | NM_175856    | CHSY-2  | chondroitin synthase-2 (CHSY-2), mRNA                                                         | -1.20         | 0.44        | -0.45        | 0.15       | -0.75           | 0.09    |
| Hs_12plexchip_3_2535  | v2HS_67521  | TTTGATATTGGATTGGAGGCA  | NM_004882    | CIR     | CBF1 interacting corepressor (CIR), mRNA                                                      | -0.86         | 0.18        | -0.15        | 0.64       | -0.71           | 0.19    |
| Hs_12plexchip_6_6961  | v2HS_219871 | ATCATACTCCAATCTCGCCA   | NM_032830    | CIRH1A  | cirrhosis, autosomal recessive 1A (cirhin) (CIRH1A), mRNA                                     | -2.99         | 0.63        | -1.60        | 1.61       | -1.39           | 0.27    |
| Hs_12plexchip_3_2222  | v2HS_69129  | AAGTGCAAAGAGATGACTGCAG | NM_007174    | CIT     | citron (rho-interacting, serine/threonine kinase 21) (CIT), mRNA                              | -1.34         | 0.79        | -0.37        | 1.13       | -0.97           | 0.30    |
| Hs_12plexchip_4_4727  | v2HS_201960 | ATTGTGCTGCAAGTTATTGGCT | NM_007174    | CIT     | citron (rho-interacting, serine/threonine kinase 21) (CIT), mRNA                              | -0.71         | 0.29        | 0.08         | 0.83       | -0.79           | 0.24    |
| Hs_12plexchip_3_8327  | v2HS_95214  | TTAGTAAACTAAAGTCGAGGG  | NM_001008938 | CKAP5   | cytoskeleton associated protein 5 (CKAP5), transcript variant 1, mRNA                         | -3.56         | 1.02        | -1.93        | 0.73       | -1.63           | 0.09    |
| Hs_12plexchip_6_2053  | v2HS_201392 | ATTAGAAATATCAAAGACACCG | NM_001015001 | CKMT1A  | creatine kinase, mitochondrial 1A (CKMT1A), nuclear gene encoding mitochondrial protein, mRNA | -1.04         | 0.54        | -0.14        | 0.95       | -0.89           | 0.25    |
| Hs_12plexchip_2_2640  | v2HS_88703  | TTGTGATGCCATAAATCTGTG  | NM_000083    | CLCN1   | chloride channel 1, skeletal muscle (Thomsen disease, autosomal dominant) (CLCN1), mRNA       | -0.78         | 0.32        | -0.04        | 0.50       | -0.73           | 0.11    |
| Hs_12plexchip_5_5654  | v2HS_256894 | TAATTGGAAGCAAATCACAGCT | NM_000083    | CLCN1   | chloride channel 1, skeletal muscle (Thomsen disease, autosomal dominant) (CLCN1), mRNA       | -1.31         | 0.45        | -0.18        | 0.22       | -1.13           | 0.03    |
| Hs0P00007094          | v2HS_95077  | TAACATGTCTATTAACCTGGA  | NM_006984    | CLDN10  | claudin 10 (CLDN10), transcript variant 2, mRNA                                               | -1.01         | 0.43        | -0.16        | 0.70       | -0.84           | 0.17    |
| Hs_12plexchip_5_8526  | v2HS_113072 | ATCTTGTGGTGCTGTGTGCA   | NM_001288    | CLIC1   | chloride intracellular channel 1 (CLIC1), mRNA                                                | -2.26         | 0.55        | -0.34        | 1.31       | -1.92           | 0.11    |
| Hs_12plexchip_5_12863 | v2HS_85244  | ATTCGTTAGTACATATCCAGGA | NM_013943    | CLIC4   | chloride intracellular channel 4 (CLIC4), mRNA                                                | -0.70         | 0.16        | 0.25         | 0.72       | -0.95           | 0.15    |
| Hs_12plexchip_5_6542  | v2HS_262685 | TATACTCCACACATACAAGGC  | NM_003993    | CLK2    | CDC-like kinase 2 (CLK2), mRNA                                                                | -1.07         | 0.81        | 0.43         | 1.14       | -1.50           | 0.14    |
| Hs_12plexchip_6_6739  | v2HS_157517 | TTAACAGTGTAGGTACGCTCCC | NM_024734    | CLMN    | calmin (calponin-like, transmembrane) (CLMN), mRNA                                            | -0.93         | 0.27        | -0.03        | 0.65       | -0.90           | 0.12    |
| Hs_12plexchip_2_2156  | v2HS_90670  | ATTAGGGACTTCAAACATTGGT | NM_006660    | CLPX    | ClpX caseinolytic peptidase X homolog (E. coli) (CLPX), mRNA                                  | -0.79         | 0.89        | 0.15         | 0.79       | -0.94           | 0.24    |
| Hs_12plexchip_5_4277  | v2HS_259796 | TTTCTGTGGGAGCTGGCTAGGC | NM_014718    | CLSTN3  | calsynenin 3 (CLSTN3), mRNA                                                                   | -0.95         | 0.11        | 0.53         | 0.59       | -1.49           | 0.04    |
| Hs0P00010717          | v2HS_150632 | TTATTGACGTACTTACTCCCT  | NM_001831    | CLU     | CLUSTERIN                                                                                     | -0.72         | 0.30        | 0.45         | 0.48       | -1.17           | 0.03    |
| Hs_12plexchip_6_4923  | v2HS_220463 | TTCTTCTGGTGCTTTGTCTCT  | NM_005140    | CNGA2   | cyclic nucleotide gated channel alpha 2 (CNGA2), mRNA                                         | -1.64         | 1.03        | -0.60        | 0.73       | -1.04           | 0.24    |
| Hs_12plexchip_3_5087  | v2HS_115263 | TAAATCAATCAGTAGCTGTGCA | NM_016284    | CNOT1   | CCR4-NOT transcription complex, subunit 1 (CNOT1), transcript variant 1, mRNA                 | -2.14         | 0.59        | -0.89        | 1.47       | -1.25           | 0.28    |
| Hs0P00005661          | v2HS_115260 | TATCAATGGCATAGGACAGCGT | NM_206999    | CNOT1   | CCR4-NOT transcription complex, subunit 1 (CNOT1), transcript variant A, mRNA                 | -2.09         | 0.52        | 0.51         | 0.34       | -2.60           | 0.00    |
| Hs_12plexchip_6_8614  | v2HS_215771 | ATGTCTCAAAGTCTCTGACAT  | NM_006586    | CNPY3   | canopy 3 homolog (zebrafish) (CNPY3), mRNA                                                    | -0.98         | 1.11        | 0.13         | 0.42       | -1.11           | 0.22    |
| Hs_12plexchip_3_12772 | v2HS_245484 | TTTCAATGACAGATGTGCTGCT | NM_175613    | CNTN4   | contactin 4 (CNTN4), transcript variant 3, mRNA                                               | -1.11         | 0.89        | -0.35        | 0.32       | -0.75           | 0.28    |
| Hs_12plexchip_6_8734  | v2HS_27668  | TTAAAGGAGCCCTGTGTGGCCA | NM_003632    | CNTNAP1 | contactin associated protein 1 (CNTNAP1), mRNA                                                | -1.71         | 0.77        | -0.44        | 1.05       | -1.27           | 0.17    |
| Hs_12plexchip_5_9154  | v2HS_268783 | ATATTGTATTGATGGAATGGT  | NM_014900    | COBLL1  | COBL-like 1 (COBLL1), mRNA                                                                    | -1.10         | 0.21        | -0.19        | 0.47       | -0.92           | 0.06    |
| Hs_12plexchip_3_2348  | v2HS_71589  | TTATTGTATAGGACATCTCCT  | NM_001854    | COL11A1 | collagen, type XI, alpha 1 (COL11A1), transcript variant A, mRNA                              | -1.00         | 0.68        | -0.15        | 0.33       | -0.85           | 0.15    |
| Hs_12plexchip_5_3992  | v2HS_261190 | TTGAGCATTGCCTTTGATTGCT | NM_000088    | COL1A1  | collagen, type I, alpha 1 (COL1A1), mRNA                                                      | -1.24         | 1.00        | -0.03        | 1.32       | -1.21           | 0.28    |
| Hs_12plexchip_3_2655  | v2HS_69100  | AACCAATAGGCAATCCTGGGCC | NM_152890    | COL24A1 | collagen, type XXIV, alpha 1 (COL24A1), mRNA                                                  | -1.41         | 0.02        | -0.37        | 1.09       | -1.04           | 0.24    |
| Hs_12plexchip_3_4527  | v2HS_114742 | TTTGAGATGCAAATATGCCCT  | NM_015719    | COL5A3  | collagen, type V, alpha 3 (COL5A3), mRNA                                                      | -0.93         | 0.39        | -0.07        | 0.45       | -0.86           | 0.07    |

| Probe ID              | v2HS        | Sequence               | Accession    | Symbol  | Gene Name                                                                                                    | Mut log2 mean | Mut log2 SD | WT log2 Mean | WT log2 SD | log2 difference | P-value |
|-----------------------|-------------|------------------------|--------------|---------|--------------------------------------------------------------------------------------------------------------|---------------|-------------|--------------|------------|-----------------|---------|
| Hs0P00004205          | v2HS_254700 | TTTATTCGCCGATTCATAAGCA | NM_004236    | COPS2   | COP9 CONSTITUTIVE PHOTOMORPHOGENIC HOMOLOG SUBUNIT 2 (ARABIDOPSIS)                                           | -1.37         | 0.10        | -0.01        | 0.06       | -1.37           | 0.00    |
| Hs_12plexchip_4_5654  | v2HS_27408  | TAAAGAGATGACAAGCATTGCT | NM_003653    | COPS3   | COP9 constitutive photomorphogenic homolog subunit 3 (Arabidopsis) (COPS3), mRNA                             | -0.77         | 0.64        | 0.62         | 1.19       | -1.39           | 0.17    |
| Hs0P00006262          | v2MM_21587  | TATGATTCCAACATGATATGGC | NM_011991    | COPS3   | COP9 (CONSTITUTIVE PHOTOMORPHOGENIC) HOMOLOG, SUBUNIT 3 (ARABIDOPSIS THALIANA)                               | -1.09         | 0.41        | -0.24        | 0.44       | -0.84           | 0.07    |
| Hs0P00005048          | v2HS_229617 | TTAGCTTAATACACAGAGACCC | NM_016129    | COPS4   | COP9 CONSTITUTIVE PHOTOMORPHOGENIC HOMOLOG SUBUNIT 4 (ARABIDOPSIS)                                           | -3.17         | 0.96        | 1.41         | 0.62       | -4.59           | 0.00    |
| Hs0P00005841          | v2HS_258048 | ATATTTAGGACACTTCAGAGCA | NM_006837    | COPS5   | COP9 CONSTITUTIVE PHOTOMORPHOGENIC HOMOLOG SUBUNIT 5 (ARABIDOPSIS)                                           | -1.56         | 0.22        | -0.29        | 0.31       | -1.27           | 0.01    |
| Hs_12plexchip_6_1364  | v2HS_118859 | ATATAAGCTAGAAGCTGACCA  | NM_198189    | COPS8   | COP9 constitutive photomorphogenic homolog subunit 8 (Arabidopsis) (COPS8), transcript variant 2, mRNA       | -1.65         | 1.87        | 0.12         | 1.66       | -1.77           | 0.29    |
| Hs_12plexchip_3_8592  | v2HS_230806 | TTCCATTCTCCATCTTCTGGG  | NM_016057    | COPZ1   | coatamer protein complex, subunit zeta 1 (COPZ1), mRNA                                                       | -0.83         | 0.32        | 0.06         | 0.97       | -0.89           | 0.25    |
| Hs_12plexchip_5_12701 | v2HS_197844 | TAATCCAAATAATGTCCACCGT | NM_006587    | CORIN   | corin, serine peptidase (CORIN), mRNA                                                                        | -0.93         | 0.28        | -0.20        | 0.36       | -0.73           | 0.06    |
| Hs_12plexchip_4_467   | v2HS_159527 | TTCTCCTTCTCCTCAGGCCT   | NM_032609    | COX4I2  | cytochrome c oxidase subunit IV isoform 2 (lung) (COX4I2), nuclear gene encoding mitochondrial protein, mRNA | -2.40         | 0.26        | -0.54        | 0.49       | -1.86           | 0.01    |
| Hs_12plexchip_6_9703  | v2HS_194922 | TAAACAATTCATTATTACACCA | NM_001866    | COX7B   | cytochrome c oxidase subunit VIIb (COX7B), nuclear gene encoding mitochondrial protein, mRNA                 | -0.84         | 0.40        | -0.05        | 0.10       | -0.79           | 0.07    |
| Hs_12plexchip_5_12790 | v2HS_47731  | GTATGAGACCAGTTGTGTGGC  | NM_152930    | CPNE1   | copine I (CPNE1), transcript variant 7, mRNA                                                                 | -2.35         | 1.06        | -0.88        | 0.18       | -1.47           | 0.13    |
| Hs_12plexchip_5_589   | v2HS_47732  | ATCTTGACACGGATAGTTCCAG | NM_152930    | CPNE1   | copine I (CPNE1), transcript variant 7, mRNA                                                                 | -0.90         | 0.51        | -0.12        | 0.32       | -0.78           | 0.10    |
| Hs_12plexchip_3_2449  | v2HS_54192  | ATAGTCCACAACCTTGGTTGGG | NM_130808    | CPNE4   | copine IV (CPNE4), mRNA                                                                                      | -1.33         | 0.63        | -0.15        | 1.03       | -1.18           | 0.18    |
| Hs_12plexchip_2_12565 | v2HS_200540 | GTAATCCACAATGAACCTGC   | NM_020939    | CPNE5   | copine V (CPNE5), mRNA                                                                                       | -1.51         | 0.20        | -0.65        | 0.54       | -0.86           | 0.10    |
| Hs_12plexchip_6_4659  | v2HS_179686 | ATACTTCTGACATCATGTCTCT | NM_017437    | CPSF2   | cleavage and polyadenylation specific factor 2, 100kDa (CPSF2), mRNA                                         | -1.76         | 0.43        | -0.52        | 0.97       | -1.24           | 0.14    |
| Hs0P00010064          | v2HS_24305  | TTGATCTCAGTGGTGCCACGG  | NM_004378    | CRABP1  | cellular retinoic acid binding protein 1 (CRABP1), mRNA                                                      | -2.05         | 0.87        | -0.94        | 0.26       | -1.10           | 0.15    |
| Hs_12plexchip_2_9846  | v2HS_16655  | ATGGGTAATAATATTAGTGCT  | NM_003851    | CREG1   | cellular repressor of E1A-stimulated genes 1 (CREG1), mRNA                                                   | -1.39         | 0.47        | -0.14        | 0.37       | -1.25           | 0.03    |
| Hs_12plexchip_3_9661  | v2HS_234794 | AATAATTTAAAGGGTAAGTCCG | NM_024324    | CRELD2  | cysteine-rich with EGF-like domains 2 (CRELD2), mRNA                                                         | -0.91         | 0.33        | -0.14        | 0.26       | -0.77           | 0.03    |
| Hs_12plexchip_5_10727 | v2HS_135449 | ATACACTTCCGTGCATGGGCA  | NM_016652    | CRNKL1  | crooked neck pre-mRNA splicing factor-like 1 (Drosophila) (CRNKL1), mRNA                                     | -1.57         | 0.65        | -0.33        | 0.41       | -1.24           | 0.06    |
| Hs_12plexchip_5_9115  | v2HS_97938  | TTGATGCATTAGGGTAGATGGG | NM_016190    | CRNN    | cornulin (CRNN), mRNA                                                                                        | -1.11         | 0.13        | 0.23         | 0.15       | -1.34           | 0.00    |
| Hs_12plexchip_6_3781  | v2HS_172863 | ATAAGTTAGAGCGGTTGTCCA  | NM_004075    | CRY1    | cryptochrome 1 (photolyase-like) (CRY1), mRNA                                                                | -0.91         | 0.59        | 0.05         | 1.10       | -0.96           | 0.27    |
| Hs_12plexchip_4_7258  | v2HS_67009  | GTCATATTCAAAGGTCAAGCGG | NM_021117    | CRY2    | cryptochrome 2 (photolyase-like) (CRY2), mRNA                                                                | -1.25         | 0.22        | -0.42        | 0.92       | -0.83           | 0.26    |
| Hs_12plexchip_4_10537 | v2HS_134602 | ATAGAGTTTCACCTGGAAGCCT | NM_015974    | CRYL1   | crystallin, lambda 1 (CRYL1), mRNA                                                                           | -1.28         | 1.08        | -0.24        | 0.76       | -1.04           | 0.25    |
| Hs_12plexchip_4_12174 | v2HS_150947 | AACATAAATGAGGATCTCAGCA | NM_001014444 | CRYM    | crystallin, mu (CRYM), transcript variant 2, mRNA                                                            | -0.80         | 0.56        | 0.36         | 1.30       | -1.17           | 0.26    |
| Hs_12plexchip_2_5379  | v2HS_169296 | TTAGATAAAGACTTCCAGCCCA | NG_001109    | CRYZP1  | CRYSTALLIN, ZETA (QUINONE REDUCTASE) PSEUDOGENE 1                                                            | -0.80         | 0.32        | -0.04        | 0.44       | -0.75           | 0.08    |
| Hs_12plexchip_6_4139  | v2HS_172878 | TTAGGCTTCTCTCACTTCTGGT | NM_198324    | CS      | citrate synthase (CS), nuclear gene encoding mitochondrial protein, transcript variant 2, mRNA               | -1.03         | 0.32        | 0.26         | 1.02       | -1.28           | 0.15    |
| Hs_12plexchip_4_12319 | v2HS_113224 | AATGAATGTGCTGTACGGAGGA | NM_001316    | CSE1L   | CSE1 chromosome segregation 1-like (yeast) (CSE1L), mRNA                                                     | -3.11         | 0.70        | -1.13        | 1.02       | -1.98           | 0.06    |
| Hs0P00010372          | v2HS_191980 | TTAATTCAGTCCATAACTCGT  | NM_177436    | CSE1L   | CSE1 CHROMOSOME SEGREGATION 1-LIKE (YEAST)                                                                   | -2.14         | 0.45        | -1.40        | 0.12       | -0.74           | 0.09    |
| Hs_12plexchip_4_12062 | v2HS_150957 | TTCATTCTGCGAATTTGCTCCT | NM_001890    | CSN1S1  | casein alpha s1 (CSN1S1), transcript variant 1, mRNA                                                         | -0.71         | 0.35        | 0.30         | 0.56       | -1.01           | 0.07    |
| Hs_12plexchip_4_1055  | v2HS_671    | TATTGGTCCAGTTTATTGCT   | NM_022048    | CSNK1G1 | casein kinase 1, gamma 1 (CSNK1G1), mRNA                                                                     | -1.00         | 0.75        | 0.24         | 0.73       | -1.24           | 0.11    |
| Hs_12plexchip_4_7857  | v2HS_150988 | ATTAGTCGTAGCTTCTGTGCT  | NM_001895    | CSNK2A1 | casein kinase 2, alpha 1 polypeptide (CSNK2A1), transcript variant 2, mRNA                                   | -1.60         | 1.57        | -0.03        | 1.03       | -1.56           | 0.23    |

| Probe ID              | v2HS        | Sequence                | Accession    | Symbol    | Gene Name                                                                                                                                 | Mut log2 mean | Mut log2 SD | WT log2 Mean | WT log2 SD | log2 difference | P-value |
|-----------------------|-------------|-------------------------|--------------|-----------|-------------------------------------------------------------------------------------------------------------------------------------------|---------------|-------------|--------------|------------|-----------------|---------|
| Hs_12plexchip_4_313   | v2HS_203075 | TAATCCCTTGAACCCAGAAGCCA | NM_001324    | CSTF1     | cleavage stimulation factor, 3' pre-RNA, subunit 1, 50kDa (CSTF1), transcript variant 2, mRNA                                             | -0.71         | 0.33        | 0.05         | 0.82       | -0.77           | 0.24    |
| Hs_12plexchip_3_8151  | v2HS_229799 | TTCTCGTAGGAAATAACCTGCT  | NM_178561    | CTAGE6    | CTAGE family, member 6 (CTAGE6), mRNA                                                                                                     | -1.76         | 0.55        | -0.71        | 0.97       | -1.05           | 0.20    |
| Hs_12plexchip_5_6702  | v2HS_262377 | ATTATTGAGATGGAACAGGCC   | NM_001903    | CTNNA1    | catenin (cadherin-associated protein), alpha 1, 102kDa (CTNNA1), mRNA                                                                     | -0.82         | 0.54        | 1.07         | 0.19       | -1.89           | 0.02    |
| Hs_12plexchip_3_11951 | v2HS_239988 | TTATTCCAGAGTTCTGTCCC    | NM_003798    | CTNNAL1   | catenin (cadherin-associated protein), alpha-like 1 (CTNNAL1), mRNA                                                                       | -1.29         | 0.46        | -0.12        | 0.48       | -1.17           | 0.04    |
| Hs_12plexchip_6_1286  | v2HS_62138  | ATCTGAAAGGAGTACTATGCT   | NM_004937    | CTNS      | cystinosis, nephropathic (CTNS), transcript variant 2, mRNA                                                                               | -1.34         | 0.42        | 0.46         | 0.62       | -1.80           | 0.02    |
| Hs_12plexchip_4_4809  | v2HS_202045 | TTGTGACATAGTTGACCAGCT   | NM_147783    | CTSB      | cathepsin B (CTSB), transcript variant 5, mRNA                                                                                            | -2.10         | 0.83        | -0.95        | 1.32       | -1.15           | 0.28    |
| Hs_12plexchip_6_4024  | v2HS_178400 | ATAAAGTGACATTTCCCTGGGC  | NM_033427    | CTTNBP2   | cortactin binding protein 2 (CTTNBP2), mRNA                                                                                               | -1.16         | 1.07        | 1.49         | 1.42       | -2.64           | 0.07    |
| Hs_12plexchip_3_12285 | v2HS_26698  | AAGTAACTCAACATCCTACCA   | NM_018704    | CTTNBP2NL | CTTNBP2 N-terminal like (CTTNBP2NL), mRNA                                                                                                 | -1.80         | 0.85        | -0.67        | 0.70       | -1.13           | 0.15    |
| Hs_12plexchip_4_8999  | v2HS_172448 | TTTATTGCTGCCTGTTACCC    | NM_003478    | CUL5      | culin 5 (CUL5), mRNA                                                                                                                      | -0.98         | 0.39        | 0.22         | 0.31       | -1.21           | 0.01    |
| Hs_12plexchip_6_1487  | v2HS_151077 | TTTGAGCTGGAGTGTGTGCCG   | NM_181500    | CUX1      | cut-like homeobox 1 (CUX1), transcript variant 3, mRNA                                                                                    | -2.68         | 0.94        | -1.36        | 1.08       | -1.32           | 0.19    |
| Hs_12plexchip_4_11416 | v2HS_200239 | GTATAGACACCGATGGTAAGCT  | NM_001100812 | CXCL16    | chemokine (C-X-C motif) ligand 16 (CXCL16), transcript variant 2, mRNA                                                                    | -1.60         | 0.16        | -0.47        | 0.54       | -1.13           | 0.06    |
| Hs_12plexchip_3_2537  | v2HS_58298  | ATATGGTTTCCCAATCCCTGTC  | AK021694     | CXORF10   | CHROMOSOME X OPEN READING FRAME 10                                                                                                        | -1.38         | 0.26        | 0.17         | 0.84       | -1.55           | 0.07    |
| Hs0P00009553          | v2HS_144182 | TTTCTGGAGAGTTGCTTGGGC   | CR605567     | CXORF40A  | CHROMOSOME X OPEN READING FRAME 40A                                                                                                       | -2.08         | 0.54        | -0.28        | 0.22       | -1.80           | 0.02    |
| Hs_12plexchip_5_12147 | v2HS_137432 | ATTTGCAGATCTGGTGTCCCGT  | NM_025212    | CXXC4     | CXXC finger 4 (CXXC4), mRNA                                                                                                               | -2.04         | 0.32        | -1.02        | 0.20       | -1.02           | 0.01    |
| Hs_12plexchip_4_11473 | v2HS_136939 | TAGACTGAAGGAGAACTTCCA   | NM_025091    | CXYORF2   | CHROMOSOME X AND Y OPEN READING FRAME 2                                                                                                   | -1.17         | 0.84        | 0.00         | 0.82       | -1.17           | 0.16    |
| Hs_12plexchip_5_5008  | v2HS_258463 | TTTAATAATCTCATCTTTGCCA  | NM_014608    | CYFIP1    | cytoplasmic FMR1 interacting protein 1 (CYFIP1), transcript variant 1, mRNA                                                               | -0.76         | 0.24        | 0.26         | 0.85       | -1.03           | 0.16    |
| Hs_12plexchip_4_7839  | v2HS_113341 | TTATAGAAACCGTGTGTGCCG   | NM_001340    | CYLC2     | cylicin, basic protein of sperm head cytoskeleton 2 (CYLC2), mRNA                                                                         | -0.77         | 0.31        | 0.10         | 0.63       | -0.87           | 0.12    |
| Hs0P00003175          | v2HS_81196  | ATATACTGTCTATACTTCCCT   | NM_015247    | CYLD      | CYLINDROMATOSIS (TURBAN TUMOR SYNDROME)                                                                                                   | -0.79         | 0.54        | -0.02        | 0.10       | -0.76           | 0.13    |
| Hs_12plexchip_4_7656  | v2HS_93339  | TTTATTCTACCTGCAGGACCC   | NM_001026213 | CYP11B1   | cytochrome P450, family 11, subfamily B, polypeptide 1 (CYP11B1), nuclear gene encoding mitochondrial protein, transcript variant 2, mRNA | -1.49         | 0.79        | 0.04         | 0.62       | -1.53           | 0.06    |
| Hs_12plexchip_2_776   | v2HS_112505 | TTCTGGATCAGCCTTGCGAGGA  | NM_000784    | CYP27A1   | cytochrome P450, family 27, subfamily A, polypeptide 1 (CYP27A1), nuclear gene encoding mitochondrial protein, mRNA                       | -0.89         | 0.42        | 0.07         | 0.46       | -0.96           | 0.06    |
| Hs_12plexchip_3_6411  | v2HS_227129 | TATATTCTACCAAGGACAGCA   | NM_000784    | CYP27A1   | cytochrome P450, family 27, subfamily A, polypeptide 1 (CYP27A1), nuclear gene encoding mitochondrial protein, mRNA                       | -0.94         | 0.34        | -0.16        | 0.27       | -0.79           | 0.04    |
| Hs_12plexchip_4_8214  | v2HS_112512 | ATAAGAAACCGTAAACAGGCT   | NM_000785    | CYP27B1   | cytochrome P450, family 27, subfamily B, polypeptide 1 (CYP27B1), nuclear gene encoding mitochondrial protein, mRNA                       | -0.84         | 0.35        | 0.04         | 0.44       | -0.88           | 0.06    |
| Hs_12plexchip_4_6736  | v2HS_54610  | ATTCAGGTGAGACTAGAGGTG   | AF372495     | CYP2F1P   | CYTOCHROME P450, FAMILY 2, SUBFAMILY F, POLYPEPTIDE 1 PSEUDOGENE                                                                          | -0.84         | 0.69        | 0.00         | 0.30       | -0.84           | 0.16    |
| Hs_12plexchip_4_6165  | v2HS_24087  | TTTAACCTTATCACTCAGCGCT  | NM_004392    | DACH1     | dachshund homolog 1 (Drosophila) (DACH1), transcript variant 3, mRNA                                                                      | -1.96         | 1.65        | -0.51        | 0.48       | -1.45           | 0.26    |
| Hs_12plexchip_6_9470  | v2HS_24094  | TTAAGGTGGGACATAGGAGGA   | NM_004393    | DAG1      | dystroglycan 1 (dystrophin-associated glycoprotein 1) (DAG1), mRNA                                                                        | -1.16         | 0.45        | -0.11        | 0.26       | -1.05           | 0.04    |
| Hs_12plexchip_6_9232  | v2HS_151103 | TATCCCAATGTTATGAGAAGCC  | NM_001918    | DBT       | dihydrolipoamide branched chain transacylase E2 (DBT), nuclear gene encoding mitochondrial protein, mRNA                                  | -0.89         | 0.78        | -0.06        | 0.73       | -0.82           | 0.25    |
| Hs_12plexchip_4_10498 | v2HS_5718   | ATAAACTGACATCCGAGCAGCT  | NM_080927    | DCBLD2    | discoidin, CUB and LCCL domain containing 2 (DCBLD2), mRNA                                                                                | -0.73         | 0.69        | 0.20         | 0.65       | -0.93           | 0.16    |
| Hs_12plexchip_3_5591  | v2HS_224241 | ATTCGTAGGTAGTATTGACCA   | NM_016356    | DCDC2     | doublecortin domain containing 2 (DCDC2), mRNA                                                                                            | -1.20         | 0.27        | -0.40        | 0.56       | -0.80           | 0.11    |
| Hs_12plexchip_5_7128  | v2HS_202258 | TATTGGGATGTTCACTCGGCG   | NM_001040261 | DCLK2     | doublecortin-like kinase 2 (DCLK2), transcript variant 2, mRNA                                                                            | -1.77         | 0.50        | -0.24        | 0.28       | -1.53           | 0.02    |
| Hs_12plexchip_4_4799  | v2HS_201780 | TTCCACAAGTCTCTTGGCC     | NM_033403    | DCLK3     | doublecortin-like kinase 3 (DCLK3), mRNA                                                                                                  | -1.35         | 0.67        | -0.61        | 0.56       | -0.74           | 0.22    |

| Probe ID              | v2HS        | Sequence                | Accession    | Symbol  | Gene Name                                                                              | Mut log2 mean | Mut log2 SD | WT log2 Mean | WT log2 SD | log2 difference | P-value |
|-----------------------|-------------|-------------------------|--------------|---------|----------------------------------------------------------------------------------------|---------------|-------------|--------------|------------|-----------------|---------|
| Hs_12plexchip_3_919   | v2HS_49607  | TATTCTTAGCATTCAAGTTCTC  | NM_014881    | DCLRE1A | DNA cross-link repair 1A (PSO2 homolog, <i>S. cerevisiae</i> ) (DCLRE1A), mRNA         | -1.69         | 1.24        | -0.57        | 0.37       | -1.12           | 0.26    |
| Hs_12plexchip_4_1537  | v2HS_215061 | ATTGTCACTGAAATAAGAACAC  | NM_024348    | DCTN3   | dynactin 3 (p22) (DCTN3), transcript variant 2, mRNA                                   | -0.81         | 0.26        | 0.07         | 0.22       | -0.87           | 0.01    |
| Hs_12plexchip_5_12832 | v2HS_250781 | TAAATACAAAGCTTCTCTGCC   | NM_024348    | DCTN3   | dynactin 3 (p22) (DCTN3), transcript variant 2, mRNA                                   | -0.78         | 0.56        | 0.03         | 0.33       | -0.81           | 0.11    |
| Hs_12plexchip_2_869   | v2HS_114977 | TTTGTAAAGAGTCAGGAGGACCT | NM_016221    | DCTN4   | dynactin 4 (p62) (DCTN4), mRNA                                                         | -1.22         | 0.16        | -0.14        | 0.37       | -1.08           | 0.02    |
| Hs_12plexchip_4_11616 | v2HS_93660  | AACACAATGGAACCTGAGTGCT  | NM_178152    | DCX     | doublecortin; lissencephaly, X-linked (doublecortin) (DCX), transcript variant 2, mRNA | -1.37         | 0.41        | -0.41        | 0.64       | -0.96           | 0.10    |
| Hs_12plexchip_5_8057  | v2HS_115266 | ATCTGTCAAAGGCCTCTTGGT   | NM_016286    | DCXR    | dicarbonyl/L-xylulose reductase (DCXR), mRNA                                           | -1.42         | 0.46        | -0.54        | 0.84       | -0.88           | 0.21    |
| Hs_12plexchip_3_566   | v2HS_36557  | TTTCTCAATCAAAGGGATGGCA  | NM_004728    | DDX21   | DEAD (Asp-Glu-Ala-Asp) box polypeptide 21 (DDX21), mRNA                                | -1.91         | 0.24        | -1.12        | 0.50       | -0.78           | 0.09    |
| Hs_12plexchip_4_4835  | v2HS_238813 | AATTGAAGGAATGCCAGACCA   | NM_203499    | DDX42   | DEAD (Asp-Glu-Ala-Asp) box polypeptide 42 (DDX42), transcript variant 2, mRNA          | -0.90         | 1.05        | 0.11         | 0.88       | -1.01           | 0.27    |
| Hs_12plexchip_4_984   | v2HS_85487  | TTAAAGTCTGAAATGACCTTGT  | NM_203499    | DDX42   | DEAD (Asp-Glu-Ala-Asp) box polypeptide 42 (DDX42), transcript variant 2, mRNA          | -0.88         | 0.33        | -0.09        | 0.41       | -0.79           | 0.06    |
| Hs_12plexchip_2_9105  | v2HS_30469  | TAATTGGTGGTAAATCTGCCCA  | NM_018665    | DDX43   | DEAD (Asp-Glu-Ala-Asp) box polypeptide 43 (DDX43), mRNA                                | -1.42         | 0.58        | -0.31        | 0.47       | -1.11           | 0.06    |
| Hs_12plexchip_6_900   | v2HS_95583  | ATAAGCATAACCCCTGTTTCTC  | NM_014829    | DDX46   | DEAD (Asp-Glu-Ala-Asp) box polypeptide 46 (DDX46), mRNA                                | -1.32         | 1.16        | 0.37         | 0.83       | -1.69           | 0.12    |
| Hs_12plexchip_2_10512 | v2HS_25674  | AATAACATCCACATTAATACCT  | NM_152300    | DDX52   | DEAD (Asp-Glu-Ala-Asp) box polypeptide 52 (DDX52), transcript variant 2, mRNA          | -0.71         | 0.26        | 0.57         | 0.94       | -1.27           | 0.14    |
| Hs_12plexchip_4_11363 | v2HS_35058  | TTTCTATCTAGGAAGCTCAGCG  | NM_021010    | DEFA5   | defensin, alpha 5, Paneth cell-specific (DEFA5), mRNA                                  | -0.70         | 0.54        | 0.05         | 0.64       | -0.75           | 0.20    |
| Hs_12plexchip_6_5556  | v2HS_229535 | ATAATTCCTGGTGTGAGTCAC   | NM_054112    | DEFB118 | defensin, beta 118 (DEFB118), mRNA                                                     | -0.78         | 0.58        | 0.44         | 0.91       | -1.22           | 0.13    |
| Hs_12plexchip_4_8163  | v2HS_151156 | TTCCATCATCTCTGCTTGGCC   | NM_001927    | DES     | desmin (DES), mRNA                                                                     | -1.50         | 0.33        | -0.45        | 0.85       | -1.05           | 0.15    |
| Hs_12plexchip_5_3806  | v2HS_174890 | TTGTACAAGTACAGCCCTTGGT  | NM_017996    | DET1    | de-etiolated homolog 1 ( <i>Arabidopsis</i> ) (DET1), mRNA                             | -2.12         | 0.55        | -1.32        | 0.93       | -0.80           | 0.28    |
| Hs_12plexchip_5_9921  | v2HS_233215 | ATTTACAATATGGTTACTCTCGC | NM_001042702 | DFNB59  | deafness, autosomal recessive 59 (DFNB59), mRNA                                        | -1.09         | 0.28        | -0.22        | 0.03       | -0.87           | 0.03    |
| Hs0P00006485          | v2HS_98186  | TTTGGATGACCGTCTGGAGGCC  | NM_022719    | DGCR14  | DiGeorge syndrome critical region gene 14 (DGCR14), mRNA                               | -2.01         | 0.56        | 0.28         | 1.37       | -2.29           | 0.09    |
| Hs_12plexchip_4_9584  | v2HS_36821  | TAGCTTCATAAGATCACCAGCT  | NM_004717    | DGKI    | diacylglycerol kinase, iota (DGKI), mRNA                                               | -1.75         | 0.96        | -0.84        | 0.56       | -0.91           | 0.24    |
| Hs_12plexchip_5_7535  | v2HS_227147 | ATTCATAACACGATTGGCCT    | NM_001105571 | DHRS7C  | dehydrogenase/reductase (SDR family) member 7C (DHRS7C), mRNA                          | -1.19         | 0.67        | 1.13         | 0.91       | -2.31           | 0.03    |
| Hs_12plexchip_4_12111 | v2HS_113419 | TAATGTCAACCACTTCAGGGCC  | NM_001358    | DHX15   | DEAH (Asp-Glu-Ala-His) box polypeptide 15 (DHX15), mRNA                                | -2.12         | 0.97        | -0.97        | 1.33       | -1.14           | 0.30    |
| Hs_12plexchip_6_10126 | v2HS_96322  | ATACTCTCTGGATTGAGTGCC   | NM_138615    | DHX30   | DEAH (Asp-Glu-Ala-His) box polypeptide 30 (DHX30), transcript variant 1, mRNA          | -0.85         | 0.44        | -0.06        | 0.26       | -0.79           | 0.07    |
| Hs_12plexchip_4_10031 | v2HS_60545  | TTTATGACGGTGTCTCCCGC    | NM_014003    | DHX38   | DEAH (Asp-Glu-Ala-His) box polypeptide 38 (DHX38), mRNA                                | -2.06         | 1.15        | -0.89        | 0.79       | -1.18           | 0.23    |
| Hs_12plexchip_4_6829  | v2HS_60543  | TTTGGACTTGCAATAAGACCA   | NM_014003    | DHX38   | DEAH (Asp-Glu-Ala-His) box polypeptide 38 (DHX38), mRNA                                | -2.31         | 1.04        | -0.62        | 0.08       | -1.69           | 0.11    |
| Hs_12plexchip_6_1175  | v2HS_248092 | TATTTGTAGGAGGGAGTTGGCA  | NM_014003    | DHX38   | DEAH (Asp-Glu-Ala-His) box polypeptide 38 (DHX38), mRNA                                | -1.08         | 0.73        | -0.01        | 0.20       | -1.07           | 0.12    |
| Hs0P00000365          | v2HS_60544  | TTGTCTGATAATAGTGAGCA    | NM_014003    | DHX38   | DEAH (Asp-Glu-Ala-His) box polypeptide 38 (DHX38), mRNA                                | -2.17         | 0.12        | -0.98        | 0.29       | -1.19           | 0.01    |
| Hs0P00005107          | v2HS_113413 | AATAGTTACAAAGTCTCTGGC   | NM_001357    | DHX9    | DEAH (Asp-Glu-Ala-His) box polypeptide 9 (DHX9), mRNA                                  | -1.55         | 0.26        | -0.74        | 1.02       | -0.81           | 0.30    |
| Hs_12plexchip_4_517   | v2HS_201809 | TTTCAGGTCAAGTGAGGACGGT  | NM_177438    | DICER1  | Dicer1, Dcr-1 homolog ( <i>Drosophila</i> ) (DICER1), transcript variant 1, mRNA       | -1.16         | 1.30        | -0.10        | 0.68       | -1.07           | 0.30    |
| Hs_12plexchip_4_544   | v2HS_201808 | TTTAATACCTGCCTGAGCACCG  | NM_022105    | DIDO1   | death inducer-obliterator 1 (DIDO1), transcript variant 1, mRNA                        | -2.16         | 0.95        | -0.96        | 0.20       | -1.19           | 0.16    |
| Hs_12plexchip_4_874   | v2HS_202805 | TTTAGTCTCTGCTGATCTGCC   | NM_022105    | DIDO1   | death inducer-obliterator 1 (DIDO1), transcript variant 1, mRNA                        | -1.40         | 0.15        | -0.13        | 0.27       | -1.27           | 0.00    |
| Hs_12plexchip_5_10236 | v2HS_101621 | TAACCCAAGAATATATTCGGA   | NM_033081    | DIDO1   | death inducer-obliterator 1 (DIDO1), transcript variant 4, mRNA                        | -0.81         | 0.13        | -0.12        | 0.09       | -0.70           | 0.00    |

| Probe ID              | v2HS        | Sequence                | Accession    | Symbol        | Gene Name                                                                                                                                          | Mut log2 mean | Mut log2 SD | WT log2 Mean | WT log2 SD | log2 difference | P-value |
|-----------------------|-------------|-------------------------|--------------|---------------|----------------------------------------------------------------------------------------------------------------------------------------------------|---------------|-------------|--------------|------------|-----------------|---------|
| Hs_12plexchip_5_6670  | v2HS_242872 | ATTCTCTTCTGGAACCGGAGGG  | NM_033081    | DIDO1         | death inducer-obliterator 1 (DIDO1), transcript variant 4, mRNA                                                                                    | -1.10         | 0.22        | 0.11         | 0.83       | -1.21           | 0.12    |
| Hs_12plexchip_6_357   | v2HS_63623  | AGAAGTGATGCTTTCATGTGCT  | NM_022105    | DIDO1         | death inducer-obliterator 1 (DIDO1), transcript variant 1, mRNA                                                                                    | -0.87         | 0.99        | 0.64         | 1.41       | -1.51           | 0.21    |
| Hs_12plexchip_6_10094 | v2HS_96255  | TTTGTATGAAGATAAAGTTCGCA | NM_014953    | DIS3          | DIS3 mitotic control homolog (S. cerevisiae) (DIS3), mRNA                                                                                          | -1.45         | 0.14        | -0.57        | 0.57       | -0.89           | 0.11    |
| Hs_12plexchip_5_2027  | v2HS_210791 | TTATATTCTCCAAGAGCCGGT   | NM_033425    | DIXDC1        | DIX domain containing 1 (DIXDC1), transcript variant 2, mRNA                                                                                       | -0.97         | 0.45        | 0.95         | 0.45       | -1.92           | 0.01    |
| Hs_12plexchip_3_5505  | v2HS_113450 | TTTGATAAGAAATTCCTCAGCG  | NM_001363    | DKC1          | dyskeratosis congenita 1, dyskerin (DKC1), mRNA                                                                                                    | -2.95         | 0.55        | -1.38        | 0.94       | -1.56           | 0.08    |
| Hs_12plexchip_2_3303  | v2HS_90800  | TAAAGACATAGCGGCATCCTC   | BX537874     | DKFZP313P036  | HYPOTHETICAL PROTEIN DKFZP313P036                                                                                                                  | -0.71         | 0.84        | 0.51         | 0.89       | -1.22           | 0.16    |
| Hs_12plexchip_5_5655  | v2HS_258802 | TTCCCACTGTGCTATGTTTGCA  | BX537874     | DKFZP313P036  | HYPOTHETICAL PROTEIN DKFZP313P036                                                                                                                  | -1.36         | 0.80        | -0.09        | 0.54       | -1.27           | 0.09    |
| Hs_12plexchip_6_6453  | v2HS_215794 | TTCTCAGAAGCTTAACGTGGGCA | BX647655     | DKFZP451A211  | DKFZP451A211 PROTEIN                                                                                                                               | -0.78         | 0.70        | 0.07         | 0.18       | -0.86           | 0.16    |
| Hs_12plexchip_2_4387  | v2HS_183817 | ATTGGTTAGGACAGTCTTGGT   | AL831931     | DKFZP451B082  | HYPOTHETICAL GENE SUPPORTED BY AL831931                                                                                                            | -1.39         | 0.64        | -0.66        | 0.80       | -0.73           | 0.29    |
| Hs_12plexchip_5_9420  | v2HS_231774 | TTCTGGTACCATTGACTGGGC   | NM_001001991 | DKFZP586H2123 | regeneration associated muscle protease (DKFZP586H2123), transcript variant 2, mRNA                                                                | -1.66         | 0.27        | -0.68        | 0.53       | -0.98           | 0.07    |
| Hs_12plexchip_6_9124  | v2HS_242931 | TAAAGACACCTGTATGACACGCA | AL137340     | DKFZP761C1711 | HYPOTHETICAL PROTEIN DKFZP761C1711                                                                                                                 | -1.53         | 0.50        | 0.56         | 2.60       | -2.09           | 0.30    |
| Hs_12plexchip_5_4986  | v2HS_256423 | ATAATCTTTCTAGTCCCTGGCA  | BC033120     | DLEU2         | DELETED IN LYMPHOCTIC LEUKEMIA, 2                                                                                                                  | -1.14         | 0.81        | -0.23        | 0.22       | -0.92           | 0.18    |
| Hs_12plexchip_4_8718  | v2HS_113463 | TTATCTCTGGGATGTGCTGGT   | NM_001365    | DLG4          | discs, large homolog 4 (Drosophila) (DLG4), mRNA                                                                                                   | -1.16         | 0.63        | -0.03        | 0.79       | -1.12           | 0.13    |
| Hs_12plexchip_6_8979  | v2HS_80186  | TTCTCTCTGGCCTTGTTCGGA   | NM_015286    | DMN           | desmuslin (DMN), transcript variant B, mRNA                                                                                                        | -0.90         | 0.15        | 0.16         | 0.25       | -1.06           | 0.01    |
| Hs_12plexchip_2_3346  | v2HS_84958  | GTCAGACAGCACTTCATATGCC  | NM_001039550 | DNAJB2        | DnaJ (Hsp40) homolog, subfamily B, member 2 (DNAJB2), transcript variant 1, mRNA                                                                   | -0.71         | 0.32        | 0.04         | 0.47       | -0.76           | 0.09    |
| Hs_12plexchip_3_4119  | v2HS_39653  | CACAGTACCAGACTTGAGCTGC  | NM_153330    | DNAJB8        | DnaJ (Hsp40) homolog, subfamily B, member 8 (DNAJB8), mRNA                                                                                         | -1.43         | 0.49        | -0.61        | 0.96       | -0.82           | 0.28    |
| Hs_12plexchip_4_10794 | v2HS_156250 | TAATTTCAATCTGCGGAAAGCT  | NM_018198    | DNAJC11       | DnaJ (Hsp40) homolog, subfamily C, member 11 (DNAJC11), mRNA                                                                                       | -3.99         | 0.62        | -1.45        | 1.01       | -2.54           | 0.03    |
| Hs_12plexchip_6_6583  | v2HS_218696 | ATTCCCAATGAGCCATGCTGGT  | NM_173650    | DNAJC5G       | DnaJ (Hsp40) homolog, subfamily C, member 5 gamma (DNAJC5G), mRNA                                                                                  | -0.71         | 0.82        | 0.38         | 0.58       | -1.08           | 0.14    |
| Hs_12plexchip_3_7955  | v2HS_231386 | TATAGCAATCGAATGGCTGGGC  | NM_014787    | DNAJC6        | DnaJ (Hsp40) homolog, subfamily C, member 6 (DNAJC6), mRNA                                                                                         | -2.35         | 0.57        | -1.33        | 1.16       | -1.02           | 0.27    |
| Hs_12plexchip_5_7092  | v2HS_257328 | TTTGAGAGGAGGATGGAAGGG   | NM_001009934 | DNASE1L1      | deoxyribonuclease I-like 1 (DNASE1L1), transcript variant 4, mRNA                                                                                  | -0.70         | 0.09        | 0.40         | 0.36       | -1.11           | 0.03    |
| Hs_12plexchip_3_6731  | v2HS_96969  | AATGGGTATGGAGGAAATGCCT  | NM_015569    | DNM3          | dynammin 3 (DNM3), mRNA                                                                                                                            | -1.45         | 0.60        | 0.48         | 0.70       | -1.93           | 0.02    |
| Hs_12plexchip_5_12756 | v2HS_25257  | ATCCACTAAGAGATTATGGCTT  | NM_012100    | DNPEP         | aspartyl aminopeptidase (DNPEP), mRNA                                                                                                              | -0.82         | 0.20        | -0.05        | 0.52       | -0.77           | 0.11    |
| Hs_12plexchip_4_10262 | v2HS_118260 | TTCTCTGTCCGTAGTGTCTCCA  | NM_052951    | DNTTIP1       | deoxynucleotidyltransferase, terminal, interacting protein 1 (DNTTIP1), mRNA                                                                       | -1.02         | 1.24        | 0.92         | 0.82       | -1.94           | 0.10    |
| Hs_12plexchip_3_12323 | v2HS_242218 | ATTCACAACAGACATCTTGCC   | AB014594     | DOCK10        | KIAA0694 GENE PRODUCT                                                                                                                              | -1.22         | 1.13        | -0.20        | 0.53       | -1.03           | 0.25    |
| Hs_12plexchip_6_4180  | v2HS_176931 | TTATCCTGTAGCTGGCGGCA    | NM_024940    | DOCK5         | dedicator of cytokinesis 5 (DOCK5), mRNA                                                                                                           | -0.74         | 0.32        | 0.76         | 1.09       | -1.50           | 0.13    |
| Hs_12plexchip_5_7472  | v2HS_227962 | TTAAGTAGCAAGTGTAGAGGG   | NM_203316    | DPAGT1        | dolichyl-phosphate (UDP-N-acetylglucosamine) N-acetylglucosaminophosphotransferase 1 (GlcNAc-1-P transferase) (DPAGT1), transcript variant 2, mRNA | -1.28         | 0.15        | -0.33        | 0.58       | -0.95           | 0.10    |
| Hs0P00005098          | v2HS_113530 | TTGCTATATGGGTCATACCGGT  | NM_001383    | DPH1          | DPH1 homolog (S. cerevisiae) (DPH1), mRNA                                                                                                          | -0.83         | 0.51        | 0.19         | 0.24       | -1.02           | 0.05    |
| Hs_12plexchip_5_1838  | v2HS_215458 | TTTATCCATAAGTAACCTTGGCT | NM_199286    | DPPA3         | developmental pluripotency associated 3 (DPPA3), mRNA                                                                                              | -0.77         | 0.64        | 0.52         | 0.79       | -1.29           | 0.10    |
| Hs_12plexchip_6_2120  | v2HS_175264 | AAGCCTTAACATTTCAAGGGCT  | NM_018370    | DRAM          | damage-regulated autophagy modulator (DRAM), mRNA                                                                                                  | -0.81         | 0.53        | 0.21         | 0.90       | -1.02           | 0.18    |
| Hs_12plexchip_4_6660  | v2HS_62024  | GTTGGAATCCAAAGTGTAGCCT  | NM_024421    | DSC1          | desmocollin 1 (DSC1), transcript variant Dsc1a, mRNA                                                                                               | -2.08         | 0.53        | -1.09        | 1.09       | -0.99           | 0.25    |
| Hs_12plexchip_6_8462  | v2HS_113567 | TTTGGTAGCCACGGATAATCCC  | NM_001389    | DSCAM         | Down syndrome cell adhesion molecule (DSCAM), transcript variant 1, mRNA                                                                           | -0.90         | 0.88        | 0.33         | 1.22       | -1.23           | 0.24    |
| Hs_12plexchip_5_3353  | v2HS_14233  | TAATAGATGAGGGAGATGAGGG  | NM_015177    | DTX4          | deltex 4 homolog (Drosophila) (DTX4), mRNA                                                                                                         | -0.70         | 0.67        | 0.06         | 0.14       | -0.76           | 0.18    |



| Probe ID              | v2HS        | Sequence                | Accession    | Symbol  | Gene Name                                                                                 | Mut log2 mean | Mut log2 SD | WT log2 Mean | WT log2 SD | log2 difference | P-value |
|-----------------------|-------------|-------------------------|--------------|---------|-------------------------------------------------------------------------------------------|---------------|-------------|--------------|------------|-----------------|---------|
| Hs_12plexchip_2_4285  | v2HS_74456  | TTTGGTACTGAATTACCGTGCG  | NM_015343    | DULLARD | dullard homolog (Xenopus laevis) (DULLARD), mRNA                                          | -1.37         | 0.53        | -0.38        | 0.46       | -0.99           | 0.07    |
| Hs_12plexchip_4_6986  | v2HS_72343  | ATAACCAATCCCATTCTGCTGC  | NM_030640    | DUSP16  | dual specificity phosphatase 16 (DUSP16), mRNA                                            | -0.73         | 0.38        | 0.04         | 0.16       | -0.77           | 0.05    |
| Hs0P00002692          | v2HS_111452 | TAGGGCAAGATCTCCACAGGGC  | L11329       | DUSP2   | DUAL SPECIFICITY PHOSPHATASE 2                                                            | -0.83         | 0.59        | 0.29         | 0.51       | -1.12           | 0.07    |
| Hs_12plexchip_4_8671  | v2HS_111215 | TATTCTTCCTTCAGCCACTGCC  | XM_001132925 | DUSP22  | PREDICTED:dual specificity phosphatase 22 (DUSP22), mRNA                                  | -1.64         | 1.80        | 0.15         | 1.06       | -1.79           | 0.23    |
| Hs0P00012140          | v2HS_15210  | GTGCAATTACCAAGGACAGGCC  | U46462       | DVL1L1  | DISHEVELLED, DSH HOMOLOG 1 (DROSOPHILA)-LIKE 1                                            | -0.88         | 0.90        | -0.13        | 0.24       | -0.75           | 0.28    |
| Hs_12plexchip_3_11958 | v2HS_239658 | TATGTTAACGTGTGGGTGTGGG  | NM_004423    | DVL3    | dishevelled, dsh homolog 3 (Drosophila) (DVL3), mRNA                                      | -0.80         | 0.07        | 0.21         | 0.14       | -1.01           | 0.00    |
| Hs_12plexchip_3_2463  | v2HS_70419  | ATTGGAGAGGACATCCTGATGC  | NM_080677    | DYNLL2  | dynein, light chain, LC8-type 2 (DYNLL2), mRNA                                            | -1.95         | 0.28        | -0.01        | 0.47       | -1.94           | 0.01    |
| Hs_12plexchip_5_9771  | v2HS_269319 | TAAATGGAATGAAACTTCCTT   | BC007223     | DYNLRB1 | DYNEIN LIGHT CHAIN 2A                                                                     | -0.84         | 0.55        | 0.52         | 0.47       | -1.37           | 0.03    |
| Hs_12plexchip_5_12415 | v2HS_250317 | ATTCTGTAACTTCTCTAGCT    | NM_006520    | DYNLT3  | dynein, light chain, Tctex-type 3 (DYNLT3), mRNA                                          | -2.39         | 1.12        | -0.77        | 0.36       | -1.62           | 0.12    |
| Hs_12plexchip_5_11636 | v2HS_139152 | TTTCATCTCATCTAAATGACCC  | NM_033083    | EAF1    | ELL associated factor 1 (EAF1), mRNA                                                      | -0.73         | 0.29        | -0.01        | 0.54       | -0.72           | 0.13    |
| Hs_12plexchip_6_8538  | v2HS_113593 | ATGGCATTCTCTTGTGGGCC    | NM_001398    | ECH1    | enoyl Coenzyme A hydratase 1, peroxisomal (ECH1), mRNA                                    | -1.71         | 1.67        | 0.33         | 1.68       | -2.04           | 0.21    |
| Hs_12plexchip_6_9920  | v2HS_111410 | ATGGGTATTGCAGAACAGCTT   | D86874       | ECSA    | ABC TRANSPORTER ATP BINDING PROTEIN                                                       | -1.45         | 0.33        | -0.61        | 0.71       | -0.84           | 0.17    |
| Hs_12plexchip_5_5910  | v2HS_257261 | TTATGATCTCAATGTGACAGGG  | NM_021783    | EDA2R   | ectodysplasin A2 receptor (EDA2R), mRNA                                                   | -1.66         | 0.74        | -0.11        | 0.36       | -1.55           | 0.05    |
| Hs_12plexchip_6_1344  | v2HS_116709 | TAGGATGTTGGCGCGTAGGCG   | NM_030760    | EDG8    | endothelial differentiation, sphingolipid G-protein-coupled receptor, 8 (EDG8), mRNA      | -1.32         | 3.21        | 1.33         | 1.45       | -2.66           | 0.29    |
| Hs_12plexchip_3_4772  | v2HS_113620 | TTGTAGACATCCTGGAGAGGC   | NM_001402    | EEF1A1  | eukaryotic translation elongation factor 1 alpha 1 (EEF1A1), mRNA                         | -2.31         | 0.19        | -0.58        | 0.46       | -1.73           | 0.01    |
| Hs_12plexchip_6_3394  | v2HS_176517 | ATAGATGACAAAGTGAAGCCA   | NM_019065    | EFCBP2  | EF-hand calcium binding protein 2 (EFCBP2), mRNA                                          | -0.90         | 0.49        | 0.03         | 0.34       | -0.93           | 0.06    |
| Hs_12plexchip_5_12827 | v2HS_172951 | TTACAAAGGACTTGTGTGCGA   | NM_004093    | EFNB2   | ephrin-B2 (EFNB2), mRNA                                                                   | -1.29         | 0.16        | 0.28         | 0.53       | -1.58           | 0.03    |
| Hs_12plexchip_6_6409  | v2HS_236932 | ATTGACTAGTATGTTGGGCCCA  | NM_001040610 | EFTUD1  | elongation factor Tu GTP binding domain containing 1 (EFTUD1), transcript variant 2, mRNA | -1.07         | 1.30        | 0.76         | 1.89       | -1.82           | 0.25    |
| Hs_12plexchip_4_8011  | v2HS_195685 | TATCTAGATGGCTCTGACCA    | AF167462     | EIF2AK2 | EUKARYOTIC TRANSLATION INITIATION FACTOR 2-ALPHA KINASE 2                                 | -0.74         | 0.40        | 1.27         | 1.05       | -2.00           | 0.07    |
| Hs_12plexchip_5_6160  | v2HS_262246 | ATGTTGAACACTCGATTAGCA   | NM_003908    | EIF2S2  | eukaryotic translation initiation factor 2, subunit 2 beta, 38kDa (EIF2S2), mRNA          | -2.28         | 0.95        | -0.87        | 1.06       | -1.42           | 0.16    |
| Hs_12plexchip_2_10530 | v2HS_23913  | TTAGCATTGTCTTCTGCCCT    | NM_003750    | EIF3A   | eukaryotic translation initiation factor 3, subunit A (EIF3A), mRNA                       | -1.36         | 0.50        | -0.34        | 0.77       | -1.01           | 0.14    |
| Hs0P00006261          | v2MM_45585  | TAAAGGAATTTCTCCAAACGC   | NM_010123    | EIF3S10 | EUKARYOTIC TRANSLATION INITIATION FACTOR 3, SUBUNIT 10 (THETA)                            | -1.16         | 0.26        | 0.33         | 0.38       | -1.50           | 0.01    |
| Hs0P00005681          | v2HS_23869  | TCITGACTCTGCTACTGTCTT   | NM_003755    | EIF3S4  | EUKARYOTIC TRANSLATION INITIATION FACTOR 3, SUBUNIT 4 DELTA, 44KDA                        | -1.79         | 0.95        | 0.22         | 0.65       | -2.01           | 0.05    |
| Hs0P00004099          | v2HS_188192 | ATATTATGCGCAACATCTGGC   | NM_001568    | EIF3S6  | EUKARYOTIC TRANSLATION INITIATION FACTOR 3, SUBUNIT 6 48KDA                               | -1.03         | 0.17        | -0.31        | 0.10       | -0.72           | 0.01    |
| Hs0P00005621          | v2HS_242811 | TTAAGAAATCTTGAGCCAGCG   | NM_003752    | EIF3S8  | EUKARYOTIC TRANSLATION INITIATION FACTOR 3, SUBUNIT 8, 110KDA                             | -2.18         | 0.63        | -0.09        | 0.60       | -2.09           | 0.01    |
| Hs_12plexchip_5_6759  | v2HS_255163 | TTCTTTACAAAGTTAATGGCCA  | NM_014740    | EIF4A3  | eukaryotic translation initiation factor 4A, isoform 3 (EIF4A3), mRNA                     | -2.25         | 0.73        | -0.88        | 0.75       | -1.37           | 0.09    |
| Hs_12plexchip_5_7166  | v2HS_255274 | ATTCTTTACAAAGTTAATGGCC  | NM_014740    | EIF4A3  | eukaryotic translation initiation factor 4A, isoform 3 (EIF4A3), mRNA                     | -2.37         | 0.67        | 0.30         | 0.18       | -2.66           | 0.01    |
| Hs_12plexchip_6_8608  | v2HS_61908  | TTTCAAAGTCCAGGCTTTGCC   | NM_182917    | EIF4G1  | eukaryotic translation initiation factor 4 gamma, 1 (EIF4G1), transcript variant 1, mRNA  | -1.26         | 1.33        | -0.09        | 0.52       | -1.16           | 0.27    |
| Hs_12plexchip_5_8473  | v2HS_263573 | AATTTGATTGATCGTCTTTGGT  | NM_001042559 | EIF4G2  | eukaryotic translation initiation factor 4 gamma, 2 (EIF4G2), transcript variant 2, mRNA  | -1.21         | 1.00        | -0.17        | 0.87       | -1.04           | 0.25    |
| Hs_12plexchip_3_922   | v2HS_38546  | TTGGTAATTAACATAAAGCGCT  | NM_020390    | EIF5A2  | eukaryotic translation initiation factor 5A2 (EIF5A2), mRNA                               | -0.89         | 0.25        | 0.03         | 0.45       | -0.92           | 0.05    |
| Hs_12plexchip_5_11077 | v2HS_274321 | AATCAGCTAGAACCTTTGTCCAC | NM_006532    | ELL     | elongation factor RNA polymerase II (ELL), mRNA                                           | -0.74         | 0.33        | 0.95         | 0.79       | -1.69           | 0.05    |

| Probe ID              | v2HS        | Sequence               | Accession    | Symbol   | Gene Name                                                                                                 | Mut log2 mean | Mut log2 SD | WT log2 Mean | WT log2 SD | log2 difference | P-value |
|-----------------------|-------------|------------------------|--------------|----------|-----------------------------------------------------------------------------------------------------------|---------------|-------------|--------------|------------|-----------------|---------|
| Hs_12plexchip_6_5897  | v2HS_25486  | GTACATGATGGCATGAACACCA | NM_152310    | ELOVL3   | elongation of very long chain fatty acids (FEN1/Elo2, SUR4/Elo3, yeast)-like 3 (ELOVL3), mRNA             | -1.83         | 0.33        | -0.89        | 0.80       | -0.94           | 0.17    |
| Hs0P00005371          | v2HS_119088 | ATTCTCTGTGCCACAATTGGCC | NM_001104558 | ELOVL7   | ELOVL family member 7, elongation of long chain fatty acids (yeast) (ELOVL7), transcript variant 2, mRNA  | -1.64         | 0.75        | -0.27        | 1.48       | -1.37           | 0.25    |
| Hs_12plexchip_6_1030  | v2HS_197790 | TATAGACTTGTGCTTGTACAG  | NM_006331    | EMG1     | EMG1 nucleolar protein homolog (S. cerevisiae) (EMG1), mRNA                                               | -1.07         | 1.09        | 0.01         | 0.44       | -1.07           | 0.22    |
| Hs_12plexchip_5_10681 | v2HS_268779 | TAGAGCCCAATCATTGTTCCA  | NM_133455    | EMID1    | EMI domain containing 1 (EMID1), mRNA                                                                     | -2.41         | 0.52        | -0.64        | 0.69       | -1.77           | 0.03    |
| Hs_12plexchip_4_10304 | v2HS_96160  | ATTATCATAACCATGGTCCACT | NM_014936    | ENPP4    | ectonucleotide pyrophosphatase/phosphodiesterase 4 (putative function) (ENPP4), mRNA                      | -1.31         | 0.75        | -0.04        | 0.24       | -1.27           | 0.09    |
| Hs_12plexchip_4_10482 | v2HS_200934 | ATAATGCTGCCAAGAGAGACCC | NM_021572    | ENPP5    | ectonucleotide pyrophosphatase/phosphodiesterase 5 (putative function) (ENPP5), mRNA                      | -1.77         | 0.68        | -0.38        | 1.20       | -1.39           | 0.17    |
| Hs_12plexchip_5_21    | v2HS_251354 | TTACCTAATATGGTTGTGCT   | NM_021572    | ENPP5    | ectonucleotide pyrophosphatase/phosphodiesterase 5 (putative function) (ENPP5), mRNA                      | -1.56         | 0.56        | -0.24        | 0.50       | -1.33           | 0.04    |
| Hs_12plexchip_6_3588  | v2HS_176723 | TTAGGATGATATTGAGGCTGGT | NM_018424    | EPB41L4B | erythrocyte membrane protein band 4.1 like 4B (EPB41L4B), transcript variant 1, mRNA                      | -0.96         | 0.24        | 0.31         | 0.38       | -1.27           | 0.01    |
| Hs_12plexchip_5_12564 | v2HS_17743  | AACCATCCGAGTAAGAGGCC   | NM_004441    | EPHB1    | EPH receptor B1 (EPHB1), mRNA                                                                             | -1.17         | 1.39        | -0.04        | 0.62       | -1.13           | 0.29    |
| Hs_12plexchip_4_5890  | v2HS_17728  | TATAAATGTAACCATCTCACCC | NM_004446    | EPRS     | glutamyl-prolyl-tRNA synthetase (EPRS), mRNA                                                              | -2.04         | 0.31        | -0.51        | 0.55       | -1.53           | 0.02    |
| Hs_12plexchip_2_8908  | v2HS_17662  | TAAATCAATCAGGCTCACAGCT | NM_004447    | EPS8     | epidermal growth factor receptor pathway substrate 8 (EPS8), mRNA                                         | -0.70         | 0.22        | 0.07         | 0.36       | -0.78           | 0.04    |
| Hs_12plexchip_2_6285  | v2HS_173491 | ATCACTGCGCGGACTGACGGGC | NM_017729    | EPS8L1   | EPS8-like 1 (EPS8L1), transcript variant 2, mRNA                                                          | -1.41         | 1.01        | -0.48        | 0.45       | -0.93           | 0.25    |
| Hs_12plexchip_6_2031  | v2HS_241513 | TTATTGGAATGGAGAAACAGCA | NM_001006600 | ERBB2IP  | erbB2 interacting protein (ERBB2IP), transcript variant 7, mRNA                                           | -0.72         | 0.70        | 0.29         | 0.71       | -1.01           | 0.15    |
| Hs_12plexchip_6_10116 | v2HS_155116 | TTAACTAAGCAGTTAGGGCCT  | NM_017669    | ERCC6L   | excision repair cross-complementing rodent repair deficiency, complementation group 6-like (ERCC6L), mRNA | -1.30         | 0.89        | -0.01        | 0.66       | -1.30           | 0.12    |
| Hs0P00008438          | v2HS_135051 | ATATCCAGAGACTCCATGGCT  | NM_016570    | ERGIC2   | ERGIC and golgi 2 (ERGIC2), mRNA                                                                          | -0.81         | 0.65        | -0.06        | 0.68       | -0.76           | 0.23    |
| Hs_12plexchip_5_12713 | v2HS_242534 | ATGTGATAGAGGGACTGTTGGG | NM_004450    | ERH      | enhancer of rudimentary homolog (Drosophila) (ERH), mRNA                                                  | -2.18         | 0.70        | 0.43         | 0.15       | -2.61           | 0.02    |
| Hs_12plexchip_5_6453  | v2HS_160237 | ATGTGTAAGAATGCAGGTGGG  | NM_033266    | ERN2     | ENDOPLASMIC RETICULUM TO NUCLEUS SIGNALLING 2                                                             | -1.28         | 0.50        | -0.07        | 1.40       | -1.21           | 0.27    |
| Hs_12plexchip_4_12574 | v2HS_239524 | TTAGCCAGGCGCATGGATTGCT | NM_001040276 | ESR2     | estrogen receptor 2 (ER beta) (ESR2), transcript variant c, mRNA                                          | -1.35         | 0.26        | -0.47        | 1.05       | -0.87           | 0.28    |
| Hs_12plexchip_5_6685  | v2HS_17544  | TTGTAAGCTCAGGTATGGGCTG | NM_004452    | ESRRB    | estrogen-related receptor beta (ESRRB), mRNA                                                              | -1.40         | 0.66        | -0.66        | 0.25       | -0.74           | 0.19    |
| Hs_12plexchip_5_1655  | v2HS_53926  | TTATAAACACACAAACCCGGC  | NM_147127    | EVC2     | Ellis van Creveld syndrome 2 (limbin) (EVC2), mRNA                                                        | -0.85         | 0.43        | -0.05        | 0.31       | -0.81           | 0.06    |
| Hs_12plexchip_3_7059  | v2HS_97287  | TATACTCAGGAACAGCTTACCC | NM_016046    | EXOSC1   | exosome component 1 (EXOSC1), mRNA                                                                        | -0.87         | 0.50        | 0.02         | 0.42       | -0.89           | 0.08    |
| Hs_12plexchip_6_4135  | v2HS_275659 | ATTTAGTTCATATTGATAAGGA | NM_002685    | EXOSC10  | exosome component 10 (EXOSC10), transcript variant 2, mRNA                                                | -1.26         | 0.32        | 0.65         | 0.50       | -1.91           | 0.01    |
| Hs_12plexchip_5_6463  | v2HS_262285 | TATATTGACAGTTCACTAGGGC | NM_019037    | EXOSC4   | exosome component 4 (EXOSC4), mRNA                                                                        | -2.33         | 0.50        | 0.28         | 0.40       | -2.60           | 0.00    |
| Hs_12plexchip_3_1589  | v2HS_61553  | TTCATTATAGTAACTTCAGGC  | NM_181503    | EXOSC8   | exosome component 8 (EXOSC8), mRNA                                                                        | -1.04         | 0.43        | -0.29        | 0.51       | -0.75           | 0.13    |
| Hs_12plexchip_2_5132  | v2HS_172985 | TACTCTAATCCAGTGCTTGGT  | NM_172105    | EYA4     | eyes absent homolog 4 (Drosophila) (EYA4), transcript variant 4, mRNA                                     | -1.28         | 0.91        | -0.23        | 0.95       | -1.04           | 0.24    |
| Hs_12plexchip_5_12923 | v2HS_46919  | ATACATGTGACCATAGAGTGCG | NM_003950    | F2RL3    | coagulation factor II (thrombin) receptor-like 3 (F2RL3), mRNA                                            | -1.19         | 0.30        | 0.28         | 0.31       | -1.47           | 0.00    |
| Hs_12plexchip_5_11180 | v2HS_135793 | TTTAGTGCTGATACCAATCCT  | NM_024306    | FA2H     | fatty acid 2-hydroxylase (FA2H), mRNA                                                                     | -1.61         | 1.02        | -0.09        | 0.57       | -1.52           | 0.11    |
| Hs0P00011447          | v2HS_172995 | TTTCCATCAATTAGCTCCCGCA | NM_004102    | FABP3    | FATTY ACID BINDING PROTEIN 3, MUSCLE AND HEART (MAMMARY-DERIVED GROWTH INHIBITOR)                         | -0.97         | 0.91        | 0.16         | 0.86       | -1.12           | 0.20    |
| Hs_12plexchip_4_12309 | v2HS_131701 | ATGCTCTCTATAAACTCTCGT  | NM_001442    | FABP4    | fatty acid binding protein 4, adipocyte (FABP4), mRNA                                                     | -1.18         | 0.90        | -0.29        | 0.71       | -0.89           | 0.26    |
| Hs_12plexchip_4_10098 | v2HS_28006  | TACGATCAGCTCCCTATGGGTT | NM_004265    | FADS2    | fatty acid desaturase 2 (FADS2), mRNA                                                                     | -0.83         | 0.56        | -0.12        | 0.26       | -0.71           | 0.14    |
| Hs_12plexchip_5_535   | v2HS_246062 | ATACATTCAGCAAGTGATCCT  | NM_138389    | FAM114A1 | family with sequence similarity 114, member A1 (FAM114A1), mRNA                                           | -0.86         | 0.35        | 0.83         | 1.10       | -1.69           | 0.11    |

| Probe ID              | v2HS        | Sequence                | Accession    | Symbol  | Gene Name                                                                                                | Mut log2 mean | Mut log2 SD | WT log2 Mean | WT log2 SD | log2 difference | P-value |
|-----------------------|-------------|-------------------------|--------------|---------|----------------------------------------------------------------------------------------------------------|---------------|-------------|--------------|------------|-----------------|---------|
| Hs_12plexchip_6_10663 | v2HS_179101 | TTCTCGTGGTTCAGTATAGCCT  | NM_173678    | FAM139A | family with sequence similarity 139, member A (FAM139A), mRNA                                            | -1.48         | 0.53        | 0.90         | 0.79       | -2.37           | 0.02    |
| Hs_12plexchip_4_11269 | v2HS_117684 | TTGCCTCATCTCTTAGCCTC    | NM_032036    | FAM14A  | family with sequence similarity 14, member A (FAM14A), mRNA                                              | -0.75         | 0.67        | 0.15         | 0.74       | -0.90           | 0.19    |
| Hs0P00007413          | v2HS_103507 | TTTCAGGAAGAGGTGGGTTCCC  | NR_003659    | FAM39DP | family with sequence similarity 39, member D pseudogene (FAM39DP) on chromosome 15                       | -1.24         | 0.12        | -0.32        | 0.35       | -0.92           | 0.03    |
| Hs_12plexchip_5_9278  | v2HS_95877  | ATATGCCACTATAGCTTCGGGC  | NM_001040020 | FAM3C   | family with sequence similarity 3, member C (FAM3C), transcript variant 2, mRNA                          | -1.08         | 0.61        | -0.34        | 0.38       | -0.74           | 0.16    |
| Hs_12plexchip_6_2716  | v2HS_218155 | TATGTAGAAGGGATTAGTCCT   | BC047940     | FAM41C  | FAMILY WITH SEQUENCE SIMILARITY 41, MEMBER C                                                             | -1.30         | 0.60        | -0.36        | 0.33       | -0.94           | 0.09    |
| Hs_12plexchip_5_32    | v2HS_207440 | TAATAGAAAGGGTGATATCTT   | AK057953     | FAM55B  | FAMILY WITH SEQUENCE SIMILARITY 55, MEMBER B                                                             | -1.48         | 0.45        | -0.56        | 0.98       | -0.91           | 0.25    |
| Hs_12plexchip_2_5352  | v2HS_175299 | TTTAGGCAGCACTGTCAATGCA  | NM_001040217 | FAM63A  | family with sequence similarity 63, member A (FAM63A), transcript variant 2, mRNA                        | -0.86         | 0.40        | 0.85         | 1.17       | -1.71           | 0.11    |
| Hs_12plexchip_5_5432  | v2HS_78256  | TTAATATCTCATCTGCCCGGCC  | NM_138411    | FAM71E1 | family with sequence similarity 71, member E1 (FAM71E1), mRNA                                            | -1.24         | 0.41        | -0.41        | 0.26       | -0.83           | 0.05    |
| Hs_12plexchip_6_10430 | v2HS_285374 | ATATGTGAAAGAATCTCCCGT   | NM_001100910 | FAM72B  | family with sequence similarity 72, member B (FAM72B), mRNA                                              | -1.40         | 1.44        | 0.03         | 1.15       | -1.44           | 0.25    |
| Hs_12plexchip_2_10236 | v2HS_17676  | CTTCTCTGGACTTAGATTGCT   | NM_144664    | FAM76B  | family with sequence similarity 76, member B (FAM76B), mRNA                                              | -0.85         | 0.05        | 0.14         | 0.43       | -0.99           | 0.06    |
| Hs_12plexchip_2_10870 | v2HS_17675  | TTATTGTGAAATATTGGATCCT  | NM_144664    | FAM76B  | FAMILY WITH SEQUENCE SIMILARITY 76, MEMBER B                                                             | -0.97         | 0.44        | 0.11         | 0.33       | -1.08           | 0.03    |
| Hs_12plexchip_2_5284  | v2HS_179199 | AATATATCTTGCTCAGTTGCT   | AK097501     | FAM9B   | FAMILY WITH SEQUENCE SIMILARITY 9, MEMBER B                                                              | -0.72         | 0.32        | 0.04         | 0.60       | -0.75           | 0.15    |
| Hs_12plexchip_4_4693  | v2HS_83637  | TTTCTGAGTGGTCATAACTCCT  | NM_000135    | FANCA   | Fanconi anemia, complementation group A (FANCA), transcript variant 1, mRNA                              | -1.71         | 0.17        | -0.68        | 0.60       | -1.03           | 0.09    |
| Hs_12plexchip_4_4680  | v2HS_238973 | TTTCTCTCACTGGAGATTAGCT  | NM_000136    | FANCC   | Fanconi anemia, complementation group C (FANCC), mRNA                                                    | -1.05         | 0.50        | -0.16        | 0.75       | -0.90           | 0.17    |
| Hs_12plexchip_4_4816  | v2HS_239038 | ATATGCTTCAGTGTCTGGAGCC  | NM_000136    | FANCC   | Fanconi anemia, complementation group C (FANCC), mRNA                                                    | -0.84         | 0.83        | 1.46         | 1.47       | -2.30           | 0.09    |
| Hs_12plexchip_4_219   | v2HS_139154 | ATAAGATGCACCCTACTGGCT   | NM_001018115 | FANCD2  | Fanconi anemia, complementation group D2 (FANCD2), transcript variant 2, mRNA                            | -1.89         | 0.56        | -0.72        | 0.84       | -1.17           | 0.13    |
| Hs_12plexchip_5_22    | v2HS_215302 | TTAAGATCAAACCTACAAGCT   | NM_006567    | FARS2   | phenylalanyl-tRNA synthetase 2, mitochondrial (FARS2), nuclear gene encoding mitochondrial protein, mRNA | -2.48         | 0.37        | -1.23        | 0.53       | -1.24           | 0.03    |
| Hs_12plexchip_6_1391  | v2HS_96115  | TTTCTCTTAAGAGCAATCGGT   | NM_014929    | FASTKD2 | FAST kinase domains 2 (FASTKD2), mRNA                                                                    | -0.78         | 0.62        | -0.02        | 0.88       | -0.77           | 0.29    |
| Hs0P00010700          | v2HS_113773 | TTCTCTCCATAAAGTATTCCC   | NM_001436    | FBL     | FIBRILLARIN                                                                                              | -2.07         | 0.04        | -0.02        | 0.69       | -2.05           | 0.03    |
| Hs_12plexchip_4_262   | v2HS_202733 | ATAGACTGGTGGTGACGTGGT   | NM_032590    | FBXL10  | F-box and leucine-rich repeat protein 10 (FBXL10), transcript variant 1, mRNA                            | -0.72         | 1.29        | 1.05         | 1.97       | -1.77           | 0.27    |
| Hs_12plexchip_5_3246  | v2HS_51035  | TACATTCAAAAGTCTCTGCG    | NM_012308    | FBXL11  | F-box and leucine-rich repeat protein 11 (FBXL11), mRNA                                                  | -1.20         | 0.34        | 0.11         | 0.13       | -1.31           | 0.01    |
| Hs_12plexchip_5_9268  | v2HS_229011 | TTGTAATGACACACAGGAGGT   | NM_012157    | FBXL2   | F-box and leucine-rich repeat protein 2 (FBXL2), mRNA                                                    | -0.76         | 0.50        | 0.39         | 0.80       | -1.15           | 0.12    |
| Hs_12plexchip_6_3356  | v2HS_263207 | TTGTGCAAAGGTTCTTAATGCA  | NM_032875    | FBXL20  | F-box and leucine-rich repeat protein 20 (FBXL20), mRNA                                                  | -1.24         | 0.37        | 0.41         | 0.26       | -1.65           | 0.00    |
| Hs_12plexchip_5_3333  | v2HS_246503 | TTCTAGATTCATACAGCACGCA  | NM_012304    | FBXL7   | F-box and leucine-rich repeat protein 7 (FBXL7), mRNA                                                    | -1.08         | 1.21        | 0.10         | 0.47       | -1.19           | 0.23    |
| Hs_12plexchip_4_4014  | v2HS_202868 | TTAGTCTCAAGGACAGACTGCC  | NM_024907    | FBXO17  | F-box protein 17 (FBXO17), transcript variant 2, mRNA                                                    | -1.06         | 0.11        | -0.31        | 0.35       | -0.75           | 0.05    |
| Hs_12plexchip_5_6789  | v2HS_262437 | TTAAGTTGTGTCTGAAAGCCT   | NM_015176    | FBXO28  | F-box protein 28 (FBXO28), mRNA                                                                          | -0.76         | 0.11        | 0.18         | 0.30       | -0.93           | 0.02    |
| Hs_12plexchip_5_7011  | v2HS_263195 | TTAAATAAAGTAAAGACGCGCT  | NM_015176    | FBXO28  | F-box protein 28 (FBXO28), mRNA                                                                          | -0.72         | 0.65        | 0.62         | 0.86       | -1.34           | 0.10    |
| Hs_12plexchip_5_6011  | v2HS_47264  | ATTTGACCTCAGAATGACGGTG  | NM_174899    | FBXO36  | F-box protein 36 (FBXO36), mRNA                                                                          | -2.45         | 0.25        | 0.49         | 1.40       | -2.94           | 0.06    |
| Hs_12plexchip_5_3766  | v2HS_237771 | ATCACTTAAGAAATGGGCCCA   | NM_016298    | FBXO40  | F-box protein 40 (FBXO40), mRNA                                                                          | -0.91         | 0.58        | -0.20        | 0.06       | -0.71           | 0.17    |
| Hs_12plexchip_5_3909  | v2HS_254575 | TTCTGACAGCAGTTGTTACCA   | NM_183412    | FBXO44  | F-box protein 44 (FBXO44), transcript variant 2, mRNA                                                    | -0.74         | 0.48        | 0.11         | 0.88       | -0.85           | 0.24    |
| Hs_12plexchip_3_4306  | v2HS_49850  | TATAGAAACCATCAAGAGACTG  | NM_033481    | FBXO9   | F-box protein 9 (FBXO9), transcript variant 3, mRNA                                                      | -0.82         | 0.55        | 0.10         | 0.25       | -0.92           | 0.09    |
| Hs0P00005232          | v2HS_239071 | TAACACCTTCATACAGTTCCTCG | NM_031456    | FBXW10  | F-BOX AND WD-40 DOMAIN PROTEIN 10                                                                        | -0.88         | 1.27        | 0.63         | 1.27       | -1.51           | 0.22    |
| Hs_12plexchip_5_7309  | v2HS_124071 | TTGGTAGTTTCTTCTGATGGC   | NM_012300    | FBXW11  | F-BOX AND WD-40 DOMAIN PROTEIN 11                                                                        | -1.13         | 0.16        | -0.40        | 0.25       | -0.73           | 0.02    |

| Probe ID              | v2HS        | Sequence                | Accession    | Symbol   | Gene Name                                                                                  | Mut log2 mean | Mut log2 SD | WT log2 Mean | WT log2 SD | log2 difference | P-value |
|-----------------------|-------------|-------------------------|--------------|----------|--------------------------------------------------------------------------------------------|---------------|-------------|--------------|------------|-----------------|---------|
| Hs_12plexchip_4_7702  | v2HS_89328  | ATATTCTGAGACTTTGCATGGT  | NM_001013415 | FBXW7    | F-box and WD repeat domain containing 7 (FBXW7), transcript variant 3, mRNA                | -1.15         | 0.70        | 0.34         | 0.34       | -1.49           | 0.05    |
| Hs_12plexchip_5_7023  | v2HS_262108 | TAAGACTATGAGAGAGAAAGGG  | NM_153348    | FBXW8    | F-box and WD repeat domain containing 8 (FBXW8), transcript variant 1, mRNA                | -0.77         | 0.30        | -0.03        | 0.13       | -0.74           | 0.03    |
| Hs_12plexchip_2_11868 | v2HS_52975  | ATTTCGACAGAGGTAGAGTGCC  | NM_003890    | FCGBP    | Fc fragment of IgG binding protein (FCGBP), mRNA                                           | -1.11         | 0.16        | -0.34        | 0.75       | -0.77           | 0.21    |
| Hs_12plexchip_4_8858  | v2HS_93704  | TTGTAAGTACTATTTCTTCTCT  | NM_000566    | FCGR1A   | Fc fragment of IgG, high affinity Ia, receptor (CD64) (FCGR1A), mRNA                       | -1.05         | 0.67        | 0.50         | 0.68       | -1.55           | 0.05    |
| Hs_12plexchip_5_4581  | v2HS_255856 | TTAAATTCCTCATGCACCTGCC  | NM_015122    | FCHO1    | FCH domain only 1 (FCHO1), mRNA                                                            | -3.04         | 0.60        | -1.59        | 1.14       | -1.46           | 0.14    |
| Hs_12plexchip_3_5699  | v2HS_118188 | ATAAATCGGGTTGCTATCTCCA  | NM_052939    | FCRL3    | Fc receptor-like 3 (FCRL3), mRNA                                                           | -1.24         | 0.44        | -0.36        | 0.29       | -0.88           | 0.05    |
| Hs_12plexchip_3_4414  | v2HS_50567  | TTAACTCAGACACTGAGAGCC   | NM_001042548 | FEZ2     | fasciculation and elongation protein zeta 2 (zyglin II) (FEZ2), transcript variant 2, mRNA | -1.60         | 0.55        | -0.31        | 0.79       | -1.29           | 0.09    |
| Hs_12plexchip_4_5288  | v2HS_17382  | TTTAACCAGGATCCGGTTTCCC  | NM_004463    | FGD1     | FYVE, RhoGEF and PH domain containing 1 (faciogenital dysplasia) (FGD1), mRNA              | -1.26         | 0.37        | -0.41        | 0.26       | -0.85           | 0.04    |
| Hs_12plexchip_6_10249 | v2HS_241573 | TTGGTGATAGAATTGAAGGGCT  | NM_004463    | FGD1     | FYVE, RhoGEF and PH domain containing 1 (faciogenital dysplasia) (FGD1), mRNA              | -1.14         | 0.29        | -0.07        | 0.79       | -1.07           | 0.13    |
| Hs_12plexchip_5_9928  | v2HS_231178 | TTCTTCATGGAATACCACCGGG  | NM_021870    | FGG      | fibrinogen gamma chain (FGG), transcript variant gamma-B, mRNA                             | -0.74         | 0.24        | 0.57         | 0.57       | -1.32           | 0.04    |
| Hs_12plexchip_2_15    | v2HS_90389  | GTTAGATTGCCACTTTGCTGT   | NM_006682    | FGL2     | fibrinogen-like 2 (FGL2), mRNA                                                             | -0.96         | 0.86        | -0.15        | 0.59       | -0.81           | 0.26    |
| Hs_12plexchip_2_3987  | v2HS_90317  | TTGGGATCAGGTGTAACCTCG   | NM_006682    | FGL2     | fibrinogen-like 2 (FGL2), mRNA                                                             | -1.07         | 0.32        | -0.34        | 0.51       | -0.73           | 0.12    |
| Hs_12plexchip_4_10923 | v2HS_155630 | TTAATGACAGCCTTACCAGGT   | NM_018086    | FIGN     | fidetin (FIGN), mRNA                                                                       | -0.80         | 0.06        | 0.36         | 0.54       | -1.17           | 0.06    |
| Hs_12plexchip_3_10904 | v2HS_137634 | ATTTGTAGTAGAGGTTACTGGT  | NM_030917    | FIP1L1   | FIP1 like 1 (S. cerevisiae) (FIP1L1), mRNA                                                 | -0.95         | 0.42        | -0.19        | 0.89       | -0.76           | 0.28    |
| Hs_12plexchip_3_9109  | v2HS_137633 | TTTCACAGTAAGCTTCCAGGT   | NM_030917    | FIP1L1   | FIP1 like 1 (S. cerevisiae) (FIP1L1), mRNA                                                 | -1.11         | 0.25        | -0.13        | 0.47       | -0.98           | 0.05    |
| Hs_12plexchip_5_7201  | v2HS_123403 | ATTTAAGATGGTGAAGGTGCCA  | XR_015906    | FLJ10120 | PREDICTED:hypothetical protein FLJ10120 (FLJ10120), misc RNA                               | -0.74         | 0.06        | 0.04         | 0.32       | -0.78           | 0.05    |
| Hs_12plexchip_6_9356  | v2HS_155310 | TTGTAAGACTCTGCACAGACCC  | NM_018029    | FLJ10213 | hypothetical protein FLJ10213 (FLJ10213), mRNA                                             | -1.14         | 1.39        | 2.22         | 1.06       | -3.36           | 0.03    |
| Hs_12plexchip_6_6434  | v2HS_194024 | ATCTGTGATTAGACTGACATCC  | AK022609     | FLJ12547 | HYPOTHETICAL PROTEIN FLJ12547                                                              | -0.97         | 1.55        | 0.42         | 0.43       | -1.38           | 0.26    |
| Hs_12plexchip_6_1964  | v2HS_155243 | TAATTGACTAACACGCCTCCGA  | NM_017694    | FLJ20160 | FLJ20160 protein (FLJ20160), mRNA                                                          | -1.32         | 0.05        | -0.34        | 0.53       | -0.99           | 0.08    |
| Hs0P00003265          | v2HS_43260  | TTTCATGTTGGGTGAAGGGCTC  | NM_152675    | FLJ23754 | HYPOTHETICAL PROTEIN FLJ23754                                                              | -0.90         | 0.37        | -0.11        | 0.36       | -0.79           | 0.06    |
| Hs_12plexchip_3_12842 | v2HS_36158  | GTTGTCATCCATAATATCAGCT  | NM_144967    | FLJ30058 | hypothetical protein FLJ30058 (FLJ30058), mRNA                                             | -1.87         | 0.35        | -1.05        | 0.76       | -0.82           | 0.19    |
| Hs_12plexchip_3_12157 | v2HS_242505 | AATAAGAATGGTTGGTTTGGT   | NM_153008    | FLJ30277 | HYPOTHETICAL PROTEIN FLJ30277                                                              | -1.60         | 0.53        | -0.78        | 0.53       | -0.82           | 0.13    |
| Hs_12plexchip_5_7504  | v2HS_267294 | AATCCCAAATGGTAAGTCCCT   | AK055400     | FLJ30838 | HYPOTHETICAL GENE SUPPORTED BY AL832565                                                    | -2.68         | 1.44        | -0.88        | 0.10       | -1.80           | 0.16    |
| Hs_12plexchip_2_10398 | v2HS_18875  | TAATACAAATCACCAAGGGAGCC | NM_152497    | FLJ32206 | HYPOTHETICAL PROTEIN FLJ32206                                                              | -0.83         | 0.47        | 0.74         | 0.68       | -1.58           | 0.04    |
| Hs_12plexchip_6_11477 | v2HS_271938 | TAATGCTGTAATTGCGGAGGCC  | NM_001001702 | FLJ33360 | FLJ33360 protein (FLJ33360), mRNA                                                          | -0.95         | 0.27        | 0.25         | 1.19       | -1.20           | 0.22    |
| Hs0P00012742          | v2HS_103190 | TTATTGCCTTTACTTCTGTGGG  | AK092066     | FLJ34747 | HYPOTHETICAL GENE SUPPORTED BY AK092066                                                    | -1.43         | 0.08        | 0.23         | 0.50       | -1.66           | 0.03    |
| Hs_12plexchip_3_5089  | v2HS_121263 | ATATTCACACAGTGACATGGCG  | AK093463     | FLJ36144 | HYPOTHETICAL PROTEIN FLJ36144                                                              | -0.92         | 0.42        | -0.21        | 0.26       | -0.71           | 0.08    |
| Hs_12plexchip_3_2898  | v2HS_57174  | TTATATTCTGGGCCTAGGACCT  | AK095662     | FLJ38343 | HYPOTHETICAL PROTEIN FLJ38343                                                              | -0.79         | 0.04        | -0.09        | 0.62       | -0.70           | 0.19    |
| Hs_12plexchip_3_7526  | v2HS_101040 | TTTATTGCTCTATATTCAGCC   | NM_198441    | FLJ40296 | FLJ40296 protein (FLJ40296), mRNA                                                          | -0.71         | 0.30        | 0.25         | 0.56       | -0.96           | 0.08    |
| Hs_12plexchip_6_9231  | v2HS_284622 | TATACCAGTTGCTGCAATCCT   | NM_001001705 | FLJ41649 | FLJ41649 PROTEIN                                                                           | -0.90         | 0.72        | 0.69         | 0.74       | -1.59           | 0.06    |
| Hs_12plexchip_4_2413  | v2HS_184873 | TAAATAGATGACCAAATCAGGT  | AK124171     | FLJ42177 | FLJ42177 PROTEIN                                                                           | -0.95         | 1.22        | 1.63         | 1.47       | -2.57           | 0.08    |
| Hs_12plexchip_3_5599  | v2HS_129545 | ATTTGCCTTGAGGACATTTGCC  | AK124699     | FLJ42709 | HYPOTHETICAL GENE SUPPORTED BY AK124699                                                    | -1.20         | 0.58        | 0.60         | 0.41       | -1.80           | 0.01    |
| Hs_12plexchip_6_12023 | v2HS_166261 | TAGTAGGTTAAACAGGAAGGGCT | NM_207414    | FLJ43860 | FLJ43860 protein (FLJ43860), mRNA                                                          | -1.34         | 0.62        | 0.05         | 1.22       | -1.39           | 0.18    |
| Hs_12plexchip_6_5687  | v2HS_286019 | TTTCCCAAGCAGGAAGGTCCGT  | NM_207458    | FLJ46026 | FLJ46026 PROTEIN                                                                           | -1.79         | 0.36        | 1.24         | 2.11       | -3.03           | 0.13    |
| Hs_12plexchip_3_11113 | v2HS_142496 | AAGACCGTAGAAGTCATAGCCC  | NM_001004330 | FLJ46688 | FLJ46688 protein (FLJ46688), mRNA                                                          | -1.40         | 0.35        | -0.52        | 0.67       | -0.88           | 0.13    |
| Hs_12plexchip_3_4576  | v2HS_121611 | TTAACCAATTAGGTGATGGGCA  | AK075161     | FLJ90680 | FLJ90680 PROTEIN                                                                           | -1.67         | 0.33        | -0.59        | 0.65       | -1.08           | 0.08    |
| Hs_12plexchip_5_12296 | v2HS_247736 | TATTTGAGCCATTCTGTGACCC  | NM_013231    | FLRT2    | fibronectin leucine rich transmembrane protein 2 (FLRT2), mRNA                             | -1.39         | 0.17        | -0.18        | 0.40       | -1.21           | 0.02    |
| Hs_12plexchip_4_10954 | v2HS_173816 | TTTGCAATTTGGTGATAGGTGCA | NM_017791    | FLVCR2   | feline leukemia virus subgroup C cellular receptor family, member 2 (FLVCR2), mRNA         | -1.50         | 0.25        | -0.68        | 0.84       | -0.82           | 0.23    |
| Hs0P00009898          | v2HS_138374 | ATTTGGTGTGGGTGACCTGGCC  | NM_032296    | FLYWCH1  | FLYWCH-type zinc finger 1 (FLYWCH1), transcript variant 1, mRNA                            | -2.97         | 0.45        | -1.88        | 0.73       | -1.09           | 0.11    |
| Hs_12plexchip_5_7418  | v2HS_122733 | TTCTAAGCTATATCCATCGGCT  | NM_001103184 | FMN1     | formin 1 (FMN1), mRNA                                                                      | -1.01         | 0.48        | -0.26        | 0.29       | -0.75           | 0.10    |
| Hs_12plexchip_6_7169  | v2HS_246651 | AAGAGAGCGGCAATAAATGGGC  | NM_152578    | FMR1NB   | fragile X mental retardation 1 neighbor (FMR1NB), mRNA                                     | -0.91         | 0.33        | 0.11         | 0.63       | -1.03           | 0.09    |

| Probe ID              | v2HS        | Sequence               | Accession    | Symbol  | Gene Name                                                                                                          | Mut log2 mean | Mut log2 SD | WT log2 Mean | WT log2 SD | log2 difference | P-value |
|-----------------------|-------------|------------------------|--------------|---------|--------------------------------------------------------------------------------------------------------------------|---------------|-------------|--------------|------------|-----------------|---------|
| Hs_12plexchip_4_10339 | v2HS_86208  | TAAGAGGAGTTCATAATGGGCC | NM_021784    | FOXA2   | forkhead box A2 (FOXA2), transcript variant 1, mRNA                                                                | -0.88         | 0.63        | -0.03        | 0.89       | -0.85           | 0.25    |
| Hs_12plexchip_5_3203  | v2HS_204193 | AACAATTCGGAGTTTATACCTG | XM_941378    | FOXR1   | PREDICTED:forkhead box R1 (FOXR1), mRNA                                                                            | -1.40         | 0.44        | -0.31        | 0.23       | -1.08           | 0.03    |
| Hs_12plexchip_5_6695  | v2HS_262100 | ATAGGAGGCAGCAGTAAATGCA | NM_004958    | FRAP1   | FK506 binding protein 12-rapamycin associated protein 1 (FRAP1), mRNA                                              | -0.84         | 0.34        | 0.59         | 0.81       | -1.42           | 0.08    |
| Hs_12plexchip_3_857   | v2HS_36153  | CTAATGATGACTTTGGCCT    | NM_144966    | FREM1   | FRAS1 related extracellular matrix 1 (FREM1), mRNA                                                                 | -1.00         | 0.32        | 0.07         | 0.20       | -1.07           | 0.01    |
| Hs_12plexchip_3_8782  | v2HS_95990  | ATTGATAACCTGGCTAATCCCA | NM_014907    | FRMPD1  | FERM and PDZ domain containing 1 (FRMPD1), mRNA                                                                    | -1.10         | 0.15        | 0.01         | 0.54       | -1.11           | 0.06    |
| Hs_12plexchip_6_8856  | v2HS_83407  | TTAGGGTTGGACATGATATCCC | NM_001097641 | FUT3    | fucosyltransferase 3 (galactoside 3(4)-L-fucosyltransferase, Lewis blood group) (FUT3), transcript variant 4, mRNA | -1.32         | 0.71        | 0.16         | 1.56       | -1.47           | 0.24    |
| Hs_12plexchip_2_7469  | v2HS_158516 | ATGCAGGATAAATAACAAGGCC | NM_031866    | FZD8    | frizzled homolog 8 (Drosophila) (FZD8), mRNA                                                                       | -0.73         | 0.62        | 0.36         | 0.58       | -1.09           | 0.09    |
| Hs_12plexchip_4_9676  | v2HS_5829   | ATACTGTCTCACAATCCCGC   | NM_198395    | G3BP1   | GTPase activating protein (SH3 domain) binding protein 1 (G3BP1), transcript variant 2, mRNA                       | -1.27         | 1.15        | -0.36        | 0.18       | -0.91           | 0.30    |
| Hs_12plexchip_4_6875  | v2HS_66086  | ATCTTGGTTCCTGCTGAT     | NM_001081686 | G6PC2   | glucose-6-phosphatase, catalytic, 2 (G6PC2), transcript variant 2, mRNA                                            | -0.72         | 0.42        | 0.43         | 0.14       | -1.15           | 0.03    |
| Hs_12plexchip_5_7602  | v2HS_265494 | ATATGTAATGGTTCGGTCCA   | NM_005254    | GABPB2  | GA binding protein transcription factor, beta subunit 2 (GABPB2), transcript variant beta-1, mRNA                  | -2.92         | 0.87        | -1.44        | 0.52       | -1.48           | 0.08    |
| Hs_12plexchip_5_11157 | v2HS_238118 | TTTGAGGAGTAGGATTATTGCT | NM_000811    | GABRA6  | gamma-aminobutyric acid (GABA) A receptor, alpha 6 (GABRA6), mRNA                                                  | -0.80         | 0.65        | 0.52         | 1.10       | -1.32           | 0.16    |
| Hs_12plexchip_5_5905  | v2HS_259511 | ATTGGGATTCTCTCTTAGCT   | NM_001037525 | GALC    | galactosylceramidase (GALC), transcript variant 2, mRNA                                                            | -1.24         | 0.29        | -0.41        | 0.49       | -0.83           | 0.08    |
| Hs_12plexchip_3_10279 | v2HS_136380 | TAATGATATCGATCACAGGGCA | NM_024572    | GALNT14 | UDP-N-acetyl-alpha-D-galactosamine:polypeptide N-acetylgalactosaminyltransferase 14 (GalNAc-T14) (GALNT14), mRNA   | -1.00         | 0.65        | 0.21         | 0.81       | -1.21           | 0.12    |
| Hs_12plexchip_6_6522  | v2HS_99826  | ATCGATTGCAAGGGAATCTGGT | NM_054110    | GALNTL2 | UDP-N-acetyl-alpha-D-galactosamine:polypeptide N-acetylgalactosaminyltransferase-like 2 (GALNTL2), mRNA            | -0.97         | 0.37        | 0.15         | 1.14       | -1.12           | 0.22    |
| Hs_12plexchip_6_6980  | v2HS_159872 | TTATTCTCTCCATTCTGCTCCA | NM_033106    | GALP    | galanin-like peptide (GALP), mRNA                                                                                  | -0.88         | 0.56        | 0.03         | 0.74       | -0.91           | 0.17    |
| Hs_12plexchip_5_12561 | v2HS_42851  | TAAAGTTACAATGCAGTCTTGC | NM_005257    | GATA6   | GATA binding protein 6 (GATA6), mRNA                                                                               | -1.40         | 0.09        | -0.12        | 0.07       | -1.28           | 0.00    |
| Hs_12plexchip_5_12941 | v2HS_42849  | TTCTTAACAAATAGAGAAAGGC | NM_005257    | GATA6   | GATA binding protein 6 (GATA6), mRNA                                                                               | -0.73         | 0.23        | 1.12         | 0.07       | -1.85           | 0.00    |
| Hs_12plexchip_6_2560  | v2HS_155064 | AATGCTGTGGATTGCTGAGCC  | NM_017660    | GATAD2A | GATA zinc finger domain containing 2A (GATAD2A), mRNA                                                              | -1.57         | 0.58        | 0.68         | 0.07       | -2.24           | 0.02    |
| Hs_12plexchip_3_8483  | v2HS_98134  | TAGTAACTCATATACCCTGGC  | NM_021996    | GBGT1   | globoside alpha-1,3-N-acetylgalactosaminyltransferase 1 (GBGT1), mRNA                                              | -1.93         | 0.51        | -1.15        | 0.60       | -0.78           | 0.16    |
| Hs_12plexchip_5_7564  | v2HS_265805 | ATGGAGAATTACTTTACAGGA  | NM_000583    | GC      | group-specific component (vitamin D binding protein) (GC), mRNA                                                    | -0.89         | 0.10        | -0.13        | 0.60       | -0.76           | 0.15    |
| Hs0P00003410          | v2HS_36125  | TTGGGAAGGAAGGCAAGGCT   | NM_004752    | GCM2    | glial cells missing homolog 2 (Drosophila) (GCM2), mRNA                                                            | -1.61         | 0.36        | -0.44        | 0.58       | -1.17           | 0.05    |
| Hs_12plexchip_5_12786 | v2HS_249954 | TTCTCATCCAGGAAGAGGCC   | NM_004962    | GDF10   | growth differentiation factor 10 (GDF10), mRNA                                                                     | -2.00         | 0.44        | -0.78        | 0.67       | -1.22           | 0.07    |
| Hs_12plexchip_6_5273  | v2HS_232129 | AATAAGCTCTCTTCTCTGCG   | NM_182828    | GDF7    | growth differentiation factor 7 (GDF7), mRNA                                                                       | -0.81         | 0.13        | 0.08         | 0.79       | -0.89           | 0.19    |
| Hs_12plexchip_5_5249  | v2HS_83571  | TTGTGACATAGGATTATTGGA  | NM_182833    | GDPD4   | glycerophosphodiester phosphodiesterase domain containing 4 (GDPD4), mRNA                                          | -0.70         | 0.44        | 0.12         | 0.12       | -0.82           | 0.08    |
| Hs_12plexchip_3_7977  | v2HS_96642  | TTTCTGAAGGAGCTCTGGGCC  | NM_015465    | GEMIN5  | gem (nuclear organelle) associated protein 5 (GEMIN5), mRNA                                                        | -0.94         | 0.95        | 0.20         | 0.76       | -1.14           | 0.18    |
| Hs_12plexchip_2_12706 | v2HS_50314  | ATCAGATGAAAGGTGGTATGG  | NM_005110    | GFPT2   | glutamine-fructose-6-phosphate transaminase 2 (GFPT2), mRNA                                                        | -0.83         | 0.33        | -0.12        | 0.44       | -0.70           | 0.10    |
| Hs_12plexchip_3_4845  | v2HS_114535 | AATGACAATCTCTATTCCC    | NM_015660    | GIMAP2  | GTPase, IMAP family member 2 (GIMAP2), mRNA                                                                        | -0.82         | 0.48        | 0.28         | 0.63       | -1.10           | 0.08    |
| Hs_12plexchip_2_8870  | v2HS_25936  | TTCAGTAAAGGTGTTCCGTCT  | NG_000861    | GKP3    | GLYCEROL KINASE PSEUDOGENE 3                                                                                       | -1.15         | 0.50        | -0.37        | 0.22       | -0.78           | 0.10    |
| Hs_12plexchip_5_9944  | v2HS_232389 | ATATCATAGAGGGAGGAAGCCA | NM_000404    | GLB1    | galactosidase, beta 1 (GLB1), transcript variant 1, mRNA                                                           | -0.78         | 0.37        | -0.06        | 0.32       | -0.72           | 0.07    |

| Probe ID              | v2HS        | Sequence                | Accession    | Symbol  | Gene Name                                                                                                                                   | Mut log2 mean | Mut log2 SD | WT log2 Mean | WT log2 SD | log2 difference | P-value |
|-----------------------|-------------|-------------------------|--------------|---------|---------------------------------------------------------------------------------------------------------------------------------------------|---------------|-------------|--------------|------------|-----------------|---------|
| Hs_12plexchip_6_12552 | v2HS_212899 | TTTCAGTGATCTGTTGTGGCAG  | NM_000168    | GLI3    | GLI-Kruppel family member GLI3 (Greig cephalopolysyndactyly syndrome) (GLI3), mRNA                                                          | -1.31         | 0.52        | 0.68         | 0.38       | -1.99           | 0.01    |
| Hs_12plexchip_5_8454  | v2HS_225069 | ATGGTCCAAGGTATAATTGCA   | NM_031302    | GLT8D2  | glycosyltransferase 8 domain containing 2 (GLT8D2), mRNA                                                                                    | -1.20         | 0.34        | -0.34        | 0.82       | -0.86           | 0.20    |
| Hs_12plexchip_6_9018  | v2HS_227178 | ATTGCTGACTATGATAGAGGCA  | NM_002066    | GML     | GPI anchored molecule like protein (GML), mRNA                                                                                              | -0.85         | 0.21        | 0.85         | 1.88       | -1.70           | 0.26    |
| Hs_12plexchip_3_1559  | v2HS_65339  | TTATTCACATACAGCCCTGGCCC | NM_013334    | GMPPB   | GDP-mannose pyrophosphorylase B (GMPPB), transcript variant 1, mRNA                                                                         | -1.30         | 0.61        | -0.28        | 0.18       | -1.02           | 0.09    |
| Hs_12plexchip_5_5631  | v2HS_256081 | TTGAAACTAGCATTCTTCCA    | NM_021955    | GNGT1   | guanine nucleotide binding protein (G protein), gamma transducing activity polypeptide 1 (GNGT1), mRNA                                      | -2.43         | 0.76        | -1.24        | 0.89       | -1.20           | 0.15    |
| Hs_12plexchip_6_1270  | v2HS_220370 | ATACTGTTGCTCTTAGGCGCGT  | NM_019067    | GNL3L   | guanine nucleotide binding protein-like 3 (nucleolar)-like (GNL3L), mRNA                                                                    | -1.13         | 0.27        | 0.01         | 0.70       | -1.14           | 0.09    |
| Hs_12plexchip_5_12176 | v2HS_68690  | TTAGATATTGAGAGTTGTGCC   | NM_005471    | GNPDA1  | glucosamine-6-phosphate deaminase 1 (GNPDA1), mRNA                                                                                          | -0.76         | 0.31        | 0.10         | 0.23       | -0.86           | 0.02    |
| Hs_12plexchip_3_4986  | v2HS_114193 | TTTGGTCTTGGATCTTCTGCC   | NM_002076    | GNS     | glucosamine (N-acetyl)-6-sulfatase (Sanfilippo disease IIID) (GNS), mRNA                                                                    | -2.34         | 0.70        | -1.23        | 0.30       | -1.11           | 0.10    |
| Hs_12plexchip_4_5831  | v2HS_16968  | TTTCAACTGAGATTGTCTGCT   | NM_004487    | GOLGB1  | golgin B1, golgi integral membrane protein (GOLGB1), mRNA                                                                                   | -0.85         | 0.18        | 0.49         | 0.84       | -1.35           | 0.10    |
| Hs_12plexchip_5_10795 | v2HS_138347 | TTAACCTTCTACTTCTCTGCA   | NM_032292    | GON4L   | gon-4-like (C. elegans) (GON4L), transcript variant 2, mRNA                                                                                 | -1.40         | 0.07        | -0.25        | 0.24       | -1.15           | 0.01    |
| Hs_12plexchip_4_6417  | v2HS_67737  | CTGCAATATGTCTCTATGCCGC  | NM_001007025 | GOSR1   | golgi SNAP receptor complex member 1 (GOSR1), transcript variant 2, mRNA                                                                    | -1.47         | 0.98        | -0.55        | 0.85       | -0.92           | 0.29    |
| Hs_12plexchip_5_8789  | v2HS_114221 | TTTGCAGACCATAGTGAAGGCT  | NM_002080    | GOT2    | glutamic-oxaloacetic transaminase 2, mitochondrial (aspartate aminotransferase 2) (GOT2), nuclear gene encoding mitochondrial protein, mRNA | -0.78         | 0.17        | -0.05        | 0.43       | -0.73           | 0.09    |
| Hs_12plexchip_2_2826  | v2HS_82773  | GAAGCCTTTGGTCAGGTGCTCC  | NM_000174    | GP9     | glycoprotein IX (platelet) (GP9), mRNA                                                                                                      | -1.45         | 0.93        | -0.71        | 0.03       | -0.74           | 0.30    |
| Hs_12plexchip_4_10256 | v2HS_155287 | TTTAGGTGTGAAATCCACAGGT  | NM_018025    | GPATCH1 | G patch domain containing 1 (GPATCH1), mRNA                                                                                                 | -2.86         | 0.79        | -1.68        | 0.86       | -1.18           | 0.15    |
| Hs_12plexchip_4_11387 | v2HS_155370 | TATACTTCGAGAATGGTCTCCT  | NM_018040    | GPATCH2 | G patch domain containing 2 (GPATCH2), mRNA                                                                                                 | -2.08         | 0.88        | -0.84        | 0.74       | -1.24           | 0.14    |
| Hs_12plexchip_5_233   | v2HS_42299  | TATTGGGTAGACAAATAGGCCT  | NM_005276    | GPD1    | glycerol-3-phosphate dehydrogenase 1 (soluble) (GPD1), mRNA                                                                                 | -2.27         | 0.18        | -1.45        | 0.21       | -0.82           | 0.01    |
| Hs_12plexchip_6_10697 | v2HS_222249 | TTTCTTTGGCACTTTCATTCCC  | NM_032777    | GPR124  | G protein-coupled receptor 124 (GPR124), mRNA                                                                                               | -0.84         | 0.45        | -0.11        | 0.08       | -0.73           | 0.10    |
| Hs_12plexchip_6_6027  | v2HS_258769 | TACACTGGGTGACTCAGGGAT   | AK026883     | GPR157  | G PROTEIN-COUPLED RECEPTOR 157                                                                                                              | -1.43         | 0.25        | -0.65        | 0.27       | -0.77           | 0.02    |
| Hs_12plexchip_4_1142  | v2HS_196666 | CAAACATGGCCAGGTAGAGGGC  | NM_007264    | GPR182  | G protein-coupled receptor 182 (GPR182), mRNA                                                                                               | -0.89         | 0.93        | 0.18         | 0.99       | -1.07           | 0.25    |
| Hs_12plexchip_6_3687  | v2HS_169334 | TTAGCACCCATAGATAGAGGCC  | NG_001132    | GPR33   | G PROTEIN-COUPLED RECEPTOR 33                                                                                                               | -0.92         | 0.50        | 0.05         | 1.00       | -0.97           | 0.23    |
| Hs_12plexchip_6_2843  | v2HS_169533 | AACCACATGCAAAGAAAGGGCC  | NG_001217    | GPR53P  | G PROTEIN-COUPLED RECEPTOR 53, PSEUDOGENE                                                                                                   | -1.09         | 0.68        | -0.30        | 0.67       | -0.80           | 0.22    |
| Hs_12plexchip_6_374   | v2HS_55806  | CTGCTTCATCACATGGGCAGGT  | NM_005682    | GPR56   | G protein-coupled receptor 56 (GPR56), transcript variant 1, mRNA                                                                           | -2.85         | 1.14        | 0.24         | 1.68       | -3.08           | 0.07    |
| Hs_12plexchip_6_6363  | v2HS_158747 | TTGAAGAAGCAGACAAACTGCT  | NM_031936    | GPR61   | G protein-coupled receptor 61 (GPR61), mRNA                                                                                                 | -1.36         | 0.91        | -0.04        | 1.03       | -1.32           | 0.17    |
| Hs_12plexchip_4_10370 | v2HS_159238 | TAAAGCATTGATTGACTGAGCC  | NM_032554    | GPR81   | G protein-coupled receptor 81 (GPR81), mRNA                                                                                                 | -1.89         | 0.88        | 0.33         | 0.44       | -2.23           | 0.03    |
| Hs_12plexchip_3_5887  | v2HS_228172 | AACCACACTCAGCGTATCGGGC  | NM_001039848 | GPX4    | glutathione peroxidase 4 (phospholipid hydroperoxidase) (GPX4), transcript variant 3, mRNA                                                  | -2.56         | 0.17        | -1.31        | 1.20       | -1.25           | 0.21    |
| Hs_12plexchip_4_7095  | v2HS_68798  | TATAGTCATGGAGTCCAGCCTT  | NM_004810    | GRAP2   | GRB2-related adaptor protein 2 (GRAP2), mRNA                                                                                                | -2.01         | 0.69        | -0.72        | 0.46       | -1.28           | 0.06    |
| Hs_12plexchip_2_3020  | v2HS_86391  | AAGTTATATGACCCATATCCCA  | NM_198182    | GRHL1   | grainyhead-like 1 (Drosophila) (GRHL1), transcript variant 2, mRNA                                                                          | -1.02         | 0.48        | -0.16        | 0.17       | -0.86           | 0.08    |
| Hs_12plexchip_2_5247  | v2HS_176825 | TATTTCTCAGATATCGCTTCCA  | NM_024915    | GRHL2   | grainyhead-like 2 (Drosophila) (GRHL2), mRNA                                                                                                | -1.10         | 0.43        | -0.33        | 0.17       | -0.77           | 0.07    |
| Hs_12plexchip_6_2743  | v2HS_179819 | ATATAGTCACCAATGTTCCAGCA | XM_940982    | GRIP2   | PREDICTED:glutamate receptor interacting protein 2, transcript variant 2 (GRIP2), mRNA                                                      | -1.24         | 0.53        | -0.51        | 0.73       | -0.73           | 0.24    |

| Probe ID              | v2HS        | Sequence                | Accession | Symbol    | Gene Name                                                                              | Mut log2 mean | Mut log2 SD | WT log2 Mean | WT log2 SD | log2 difference | P-value |
|-----------------------|-------------|-------------------------|-----------|-----------|----------------------------------------------------------------------------------------|---------------|-------------|--------------|------------|-----------------|---------|
| Hs_12plexchip_6_4378  | v2HS_179821 | TATTTCCACCATCAAGGGTCCC  | XM_940982 | GRIP2     | PREDICTED:glutamate receptor interacting protein 2, transcript variant 2 (GRIP2), mRNA | -1.34         | 0.72        | -0.14        | 0.25       | -1.19           | 0.09    |
| Hs_12plexchip_6_10297 | v2HS_274056 | ATAACCAAGTAGCTCTTTCCCA  | NM_000845 | GRM8      | glutamate receptor, metabotropic 8 (GRM8), mRNA                                        | -0.79         | 0.37        | 0.10         | 1.01       | -0.90           | 0.26    |
| Hs_12plexchip_6_2297  | v2HS_157433 | TAAACAACACAGTCCCAGATCCG | NM_024719 | GRTP1     | growth hormone regulated TBC protein 1 (GRTP1), mRNA                                   | -0.96         | 1.40        | 1.03         | 0.83       | -1.99           | 0.12    |
| Hs_12plexchip_5_7179  | v2HS_158871 | AATACATAGAGGAGGAGTGCCA  | NM_031965 | GSG2      | germ cell associated 2 (haspin) (GSG2), mRNA                                           | -0.96         | 0.59        | -0.06        | 0.89       | -0.90           | 0.23    |
| Hs_12plexchip_5_8971  | v2HS_265999 | TTATTAATTAGCACAAATTAGGT | NM_002094 | GSPT1     | G1 to S phase transition 1 (GSPT1), mRNA                                               | -1.06         | 0.27        | 0.15         | 0.40       | -1.20           | 0.02    |
| Hs_12plexchip_4_7996  | v2HS_130925 | ATATCAATTAGGGCTCTCTCCT  | NM_000847 | GSTA3     | glutathione S-transferase A3 (GSTA3), mRNA                                             | -0.97         | 0.80        | -0.06        | 0.24       | -0.91           | 0.18    |
| Hs_12plexchip_5_12270 | v2HS_77622  | TAAGTGTTCTATCTACTGGC    | NM_172196 | GTF2A1L   | general transcription factor IIA, 1-like (GTF2A1L), transcript variant 2, mRNA         | -1.22         | 0.83        | 1.28         | 2.44       | -2.50           | 0.21    |
| Hs_12plexchip_4_9146  | v2HS_16839  | ATCTGTTGAGACTGTATGAGCT  | NM_004492 | GTF2A2    | general transcription factor IIA, 2, 12kDa (GTF2A2), mRNA                              | -0.86         | 0.47        | -0.07        | 0.80       | -0.79           | 0.23    |
| Hs0P00009792          | v2HS_132058 | TTTGTCAATTGCTGAAAGTTCGC | NM_001514 | GTF2B     | general transcription factor IIB (GTF2B), mRNA                                         | -1.40         | 0.96        | -0.28        | 0.78       | -1.12           | 0.19    |
| Hs_12plexchip_6_3222  | v2HS_176636 | ATTCATCCACCTGGAACCTCCG  | NM_019096 | GTPBP2    | GTP binding protein 2 (GTPBP2), mRNA                                                   | -0.85         | 0.71        | 0.46         | 0.22       | -1.32           | 0.07    |
| Hs0P00005158          | v2HS_203524 | TAATACTTCACAAGTCTCTCCA  | NM_020771 | HACE1     | HECT DOMAIN AND ANKYRIN REPEAT CONTAINING, E3 UBIQUITIN PROTEIN LIGASE 1               | -0.87         | 0.88        | 0.35         | 1.26       | -1.22           | 0.25    |
| Hs_12plexchip_6_8772  | v2HS_132998 | TTACAGTTCTGGCAAATTTCCC  | NM_002108 | HAL       | histidine ammonia-lyase (HAL), mRNA                                                    | -0.77         | 0.57        | 0.23         | 0.24       | -1.01           | 0.08    |
| Hs_12plexchip_5_4151  | v2HS_260265 | AATATTAAGATGAGGATTCGG   | NM_006620 | HBS1L     | HBS1-like (S. cerevisiae) (HBS1L), mRNA                                                | -2.37         | 0.29        | -1.23        | 0.41       | -1.13           | 0.02    |
| Hs_12plexchip_6_8600  | v2HS_213783 | GTAGAAGCTCATGTTCTCTGCA  | NM_005844 | HCG9      | HLA complex group 9 (HCG9), mRNA                                                       | -2.30         | 1.64        | -0.65        | 0.75       | -1.65           | 0.22    |
| Hs_12plexchip_5_7036  | v2HS_133007 | TTTGAGAATGTATTGCCTCCGA  | NM_002110 | HCK       | hemopoietic cell kinase (HCK), mRNA                                                    | -1.01         | 0.27        | 0.05         | 0.54       | -1.06           | 0.06    |
| Hs_12plexchip_5_7143  | v2HS_202598 | AAGTAGGATCCATCGGTGAGGC  | NM_020897 | HCN3      | hyperpolarization activated cyclic nucleotide-gated potassium channel 3 (HCN3), mRNA   | -1.47         | 0.87        | -0.54        | 0.27       | -0.93           | 0.20    |
| Hs_12plexchip_6_9173  | v2HS_202999 | TAATGATCTCCTCGGAAGCGG   | NM_020897 | HCN3      | hyperpolarization activated cyclic nucleotide-gated potassium channel 3 (HCN3), mRNA   | -0.86         | 0.41        | -0.16        | 0.69       | -0.71           | 0.22    |
| Hs_12plexchip_5_10270 | v2HS_262107 | ATTTGGCAGAAACATGGTAGCC  | NM_016596 | HDAC7A    | histone deacetylase 7A (HDAC7A), transcript variant 2, mRNA                            | -2.18         | 0.99        | -0.90        | 1.08       | -1.28           | 0.21    |
| Hs_12plexchip_4_4747  | v2HS_238946 | ATCATCCTTGCATCTTGCT     | NM_178423 | HDAC9     | histone deacetylase 9 (HDAC9), transcript variant 4, mRNA                              | -1.78         | 0.63        | -0.88        | 1.08       | -0.90           | 0.29    |
| Hs_12plexchip_4_10195 | v2HS_155545 | TATTAATGACACTGCTTTGGG   | NM_018072 | HEATR1    | HEAT repeat containing 1 (HEATR1), mRNA                                                | -3.41         | 1.69        | -1.04        | 0.05       | -2.38           | 0.14    |
| Hs_12plexchip_5_10673 | v2HS_269202 | TATCTTGCTCTGGTATGGC     | NM_018072 | HEATR1    | HEAT repeat containing 1 (HEATR1), mRNA                                                | -3.04         | 0.13        | -0.73        | 2.78       | -2.30           | 0.29    |
| Hs_12plexchip_5_2373  | v2HS_250230 | TATGTTTACAGACTACTGTCCCT | NM_014320 | HEBP2     | heme binding protein 2 (HEBP2), mRNA                                                   | -1.09         | 0.55        | 0.09         | 0.79       | -1.18           | 0.11    |
| Hs_12plexchip_3_7743  | v2HS_97861  | TTATCCACAGCAATGACTCGGC  | NM_016173 | HEMK1     | HemK methyltransferase family member 1 (HEMK1), mRNA                                   | -1.19         | 0.10        | -0.32        | 0.15       | -0.87           | 0.00    |
| Hs_12plexchip_3_3016  | v2HS_53633  | TTCCGTAAGACGTAGAGTGCG   | NM_020707 | HHATL     | hedgheog acyltransferase-like (HHATL), mRNA                                            | -0.71         | 0.69        | 0.28         | 0.90       | -0.99           | 0.21    |
| Hs_12plexchip_5_2196  | v2HS_198444 | AATGATCAGGAAAGTTTCAGGA  | NM_014362 | HIBCH     | 3-hydroxyisobutyryl-Coenzyme A hydrolase (HIBCH), transcript variant 1, mRNA           | -0.79         | 0.25        | 0.01         | 0.10       | -0.80           | 0.02    |
| Hs_12plexchip_5_3240  | v2HS_211804 | TTACACAAAGGGTCACTTCTCTC | NM_138820 | HIGD2A    | HIG1 domain family, member 2A (HIGD2A), mRNA                                           | -1.70         | 0.64        | -0.22        | 0.45       | -1.48           | 0.04    |
| Hs_12plexchip_6_976   | v2HS_37618  | TTACACAGACGTTTAATTAGCT  | NM_005339 | HIP2      | huntingtin interacting protein 2 (HIP2), mRNA                                          | -0.81         | 0.40        | 0.17         | 0.82       | -0.99           | 0.16    |
| Hs_12plexchip_4_11067 | v2HS_100054 | TACTTGCTTTGGCTTTATGGT   | NM_170745 | HIST1H2AA | histone cluster 1, H2aa (HIST1H2AA), mRNA                                              | -0.98         | 0.62        | 0.25         | 0.85       | -1.23           | 0.12    |
| Hs_12plexchip_6_1261  | v2HS_33915  | TTGTACTTGGTGACAGCCTT    | NM_003518 | HIST1H2BG | histone cluster 1, H2bg (HIST1H2BG), mRNA                                              | -1.61         | 0.98        | 0.37         | 1.67       | -1.98           | 0.17    |
| Hs_12plexchip_3_9250  | v2HS_133056 | AATCTTCTGGAGAGTCTGTGCC  | NM_002120 | HLA-DOB   | major histocompatibility complex, class II, DO beta (HLA-DOB), mRNA                    | -0.92         | 0.12        | 0.20         | 0.83       | -1.12           | 0.14    |
| Hs_12plexchip_4_707   | v2HS_202837 | ATTCTCTTTCTTCTCCAGCCC   | NM_178580 | HM13      | histocompatibility (minor) 13 (HM13), transcript variant 2, mRNA                       | -1.17         | 0.74        | 0.35         | 1.07       | -1.52           | 0.12    |
| Hs_12plexchip_5_11055 | v2HS_136359 | TTATCTACTAAGTCACACAGCT  | NM_024567 | HMBOX1    | homeobox containing 1 (HMBOX1), mRNA                                                   | -0.89         | 1.14        | 0.38         | 0.50       | -1.27           | 0.18    |
| Hs_12plexchip_6_8484  | v2HS_195302 | TTTAGGGAGTTAAGTCTCTGCT  | NG_001141 | HMG17P1   | HIGH-MOBILITY GROUP (NONHISTONE CHROMOSOMAL) PROTEIN 17 PSEUDOGENE 1                   | -1.27         | 0.88        | 0.03         | 1.20       | -1.30           | 0.21    |
| Hs_12plexchip_6_1839  | v2HS_195911 | ATCTAGAAATGGAACCACTGCT  | NM_005517 | HMG2      | high-mobility group nucleosomal binding domain 2 (HMG2), mRNA                          | -1.74         | 0.60        | 0.12         | 0.47       | -1.87           | 0.02    |
| Hs_12plexchip_4_2251  | v2HS_218617 | TTTCACATTATGTAGTGCCGT   | NM_004133 | HNF4G     | hepatocyte nuclear factor 4, gamma (HNF4G), mRNA                                       | -0.95         | 0.10        | -0.18        | 0.71       | -0.78           | 0.20    |
| Hs_12plexchip_6_78    | v2HS_117147 | ATGGGATAAGATTCTAAACCC   | NM_004500 | HNRNPC    | heterogeneous nuclear ribonucleoprotein C (C1/C2) (HNRNPC), transcript variant 2, mRNA | -2.01         | 0.72        | -0.86        | 0.21       | -1.14           | 0.10    |

| Probe ID              | v2HS        | Sequence                 | Accession | Symbol   | Gene Name                                                                                                                | Mut log2 mean | Mut log2 SD | WT log2 Mean | WT log2 SD | log2 difference | P-value |
|-----------------------|-------------|--------------------------|-----------|----------|--------------------------------------------------------------------------------------------------------------------------|---------------|-------------|--------------|------------|-----------------|---------|
| Hs_12plexchip_4_9368  | v2HS_196353 | ATTATTCCAAATCCTATGCCT    | NM_005968 | HNRPM    | heterogeneous nuclear ribonucleoprotein M (HNRPM), transcript variant 1, mRNA                                            | -2.91         | 0.46        | -1.73        | 0.25       | -1.18           | 0.03    |
| Hs_12plexchip_4_9135  | v2HS_27873  | TTTCCTTTGAGGGTAGCCAGTT   | NM_004272 | HOMER1   | homer homolog 1 (Drosophila) (HOMER1), mRNA                                                                              | -0.90         | 0.26        | 0.13         | 0.55       | -1.02           | 0.06    |
| Hs_12plexchip_4_8899  | v2HS_133162 | ATATTACAAGCTTTGGGCCCT    | NM_002147 | HOXB5    | homeobox B5 (HOXB5), mRNA                                                                                                | -1.13         | 0.96        | 1.29         | 0.62       | -2.42           | 0.03    |
| Hs_12plexchip_4_9806  | v2HS_196528 | TTTAGTTTCGAGGATTGTTCCGGC | NM_014212 | HOXC11   | homeobox C11 (HOXC11), mRNA                                                                                              | -2.35         | 1.04        | -1.20        | 0.47       | -1.15           | 0.18    |
| Hs0P00007673          | v2HS_136048 | TTCTTCTGTTTCATCCTCGCGGT  | NM_024501 | HOXD1    | homeobox D1 (HOXD1), mRNA                                                                                                | -1.18         | 0.40        | 0.24         | 0.46       | -1.42           | 0.02    |
| Hs_12plexchip_5_3171  | v2HS_215498 | AACCTTCATCATCCATTGTGCT   | NM_007216 | HPS5     | Hermansky-Pudlak syndrome 5 (HPS5), transcript variant 2, mRNA                                                           | -0.73         | 0.60        | 0.27         | 0.34       | -1.00           | 0.08    |
| Hs0P00011266          | v2HS_92889  | TTGTCTGCAATGGAAGGGACGG   | NM_000412 | HRG      | histidine-rich glycoprotein (HRG), mRNA                                                                                  | -0.79         | 0.52        | 1.09         | 0.96       | -1.88           | 0.06    |
| Hs_12plexchip_6_10290 | v2HS_198166 | TATAGTGTGCGCGTGTCTAGTG   | NM_005836 | HRSP12   | heat-responsive protein 12 (HRSP12), mRNA                                                                                | -0.93         | 0.24        | -0.10        | 0.56       | -0.83           | 0.11    |
| Hs0P00000216          | v2HS_59634  | ATTTCCCTAGGCACTCTCACTG   | AK091074  | HS3T5    | HEPARAN SULFATE (GLUCOSAMINE) 3-O-SULFOTRANSFERASE 5                                                                     | -0.74         | 0.09        | 0.17         | 0.28       | -0.90           | 0.02    |
| Hs_12plexchip_6_5240  | v2HS_230354 | TTAGAAGGTACAGTCTCTGCT    | NM_172002 | HSCB     | HscB iron-sulfur cluster co-chaperone homolog (E. coli) (HSCB), mRNA                                                     | -2.78         | 1.40        | -0.92        | 1.51       | -1.87           | 0.19    |
| Hs_12plexchip_2_4291  | v2HS_82370  | TTTGATAATGTGACTGTGTGGC   | NM_000198 | HSD3B2   | hydroxy-delta-5-steroid dehydrogenase, 3 beta- and steroid delta-isomerase 2 (HSD3B2), mRNA                              | -1.22         | 0.30        | 0.13         | 0.50       | -1.35           | 0.02    |
| Hs_12plexchip_6_6626  | v2HS_137326 | TAGAAGTCCCTCATGATCTGGT   | NM_025193 | HSD3B7   | hydroxy-delta-5-steroid dehydrogenase, 3 beta- and steroid delta-isomerase 7 (HSD3B7), mRNA                              | -1.86         | 0.41        | -0.58        | 0.29       | -1.28           | 0.01    |
| Hs_12plexchip_3_11020 | v2HS_138414 | TTTAGATGCAAGGTAGGTGCT    | NM_032303 | HSDL2    | hydroxysteroid dehydrogenase like 2 (HSDL2), mRNA                                                                        | -1.31         | 0.81        | 0.08         | 0.46       | -1.39           | 0.08    |
| Hs_12plexchip_3_7417  | v2HS_97802  | TTGATTGACTACTTACAAGCC    | NM_016153 | HSFX1    | heat shock transcription factor family, X linked 1 (HSFX1), mRNA                                                         | -0.70         | 0.27        | 0.09         | 0.48       | -0.79           | 0.09    |
| Hs0P00012615          | v2HS_97805  | ATTGACCAGCACATATTCTGCC   | NM_016153 | HSFX1    | heat shock transcription factor family, X linked 1 (HSFX1), mRNA                                                         | -1.25         | 1.04        | -0.23        | 0.50       | -1.02           | 0.23    |
| Hs_12plexchip_4_521   | v2HS_115310 | ATTAATCCAGCAGCTCTAGCT    | NM_016299 | HSPA14   | heat shock 70kDa protein 14 (HSPA14), transcript variant 1, mRNA                                                         | -1.67         | 0.87        | 0.14         | 0.79       | -1.81           | 0.06    |
| Hs_12plexchip_2_6111  | v2HS_173169 | ATTGTTGGGTTGGTGACAGCC    | NM_004134 | HSPA9    | heat shock 70kDa protein 9 (mortalin) (HSPA9), nuclear gene encoding mitochondrial protein, mRNA                         | -2.33         | 0.41        | -0.64        | 0.41       | -1.69           | 0.01    |
| Hs_12plexchip_3_12424 | v2HS_15950  | TCTGCAATTGACTTTGTCCGAG   | NM_145168 | HSPC105  | NAD(P) dependent steroid dehydrogenase-like (HSPC105), mRNA                                                              | -0.98         | 0.60        | 0.10         | 0.79       | -1.09           | 0.14    |
| Hs_12plexchip_5_7702  | v2HS_264750 | TAATTCTTCTCATCCAGGGCCA   | NM_016391 | HSPC111  | hypothetical protein HSPC111 (HSPC111), mRNA                                                                             | -3.06         | 1.12        | -1.94        | 0.73       | -1.12           | 0.23    |
| Hs_12plexchip_2_12383 | v2HS_199019 | TATTCTGGGTATAATGGCTCGG   | NM_014181 | HSPC159  | galectin-related protein (HSPC159), mRNA                                                                                 | -0.79         | 0.46        | 0.02         | 0.30       | -0.81           | 0.07    |
| Hs_12plexchip_4_1198  | v2HS_198948 | ATAGAGGTGGTTAAATCAGCC    | NM_014181 | HSPC159  | galectin-related protein (HSPC159), mRNA                                                                                 | -1.56         | 0.59        | -0.68        | 0.37       | -0.88           | 0.11    |
| Hs_12plexchip_3_11065 | v2HS_193423 | TTTAAGTTCAGCAATTACAGCA   | NM_199440 | HSPD1    | heat shock 60kDa protein 1 (chaperonin) (HSPD1), nuclear gene encoding mitochondrial protein, transcript variant 2, mRNA | -1.42         | 0.27        | -0.02        | 0.51       | -1.40           | 0.02    |
| Hs_12plexchip_2_8738  | v2HS_22070  | ATAATCAATCGCGTTGGACCT    | X53943    | HSSUCCDH | SUCCINATE DEHYDROGENASE FLAVOPROTEIN SUBUNIT                                                                             | -0.76         | 0.22        | 0.04         | 0.13       | -0.80           | 0.01    |
| Hs_12plexchip_3_5015  | v2HS_110972 | ATAGCCAACAGTAGCATGTGGC   | NM_031407 | HUWE1    | HECT, UBA and WWE domain containing 1 (HUWE1), mRNA                                                                      | -1.48         | 0.39        | -0.37        | 0.31       | -1.11           | 0.02    |
| Hs_12plexchip_5_6173  | v2HS_262858 | TTTAGGATCAGATTTATCTGCT   | NM_031407 | HUWE1    | HECT, UBA and WWE domain containing 1 (HUWE1), mRNA                                                                      | -1.29         | 0.70        | 0.24         | 0.61       | -1.53           | 0.05    |
| Hs_12plexchip_5_11771 | v2HS_133238 | TTAATCAGATATAATCTGAGGG   | NM_013417 | IARS     | isoleucyl-tRNA synthetase (IARS), transcript variant long, mRNA                                                          | -2.72         | 0.34        | -0.75        | 0.24       | -1.96           | 0.00    |
| Hs_12plexchip_6_9815  | v2HS_155481 | ATAGTCTCAAATGTTGTTCCA    | NM_018060 | IARS2    | isoleucyl-tRNA synthetase 2, mitochondrial (IARS2), mRNA                                                                 | -2.36         | 0.67        | -0.66        | 1.13       | -1.69           | 0.10    |
| Hs_12plexchip_5_3710  | v2HS_96821  | TTAAACACTCAGAAACAAACCA   | NM_015525 | IBTK     | inhibitor of Bruton agammaglobulinemia tyrosine kinase (IBTK), mRNA                                                      | -1.03         | 0.38        | 0.19         | 0.17       | -1.23           | 0.02    |
| Hs_12plexchip_3_7629  | v2HS_232253 | TATTGTGCAATTTCACTGGCT    | NM_016513 | ICK      | intestinal cell (MAK-like) kinase (ICK), transcript variant 2, mRNA                                                      | -0.92         | 0.48        | 0.21         | 0.39       | -1.14           | 0.04    |
| Hs_12plexchip_3_8593  | v2HS_96065  | ATATTGTGCAATTTCACTGGC    | NM_016513 | ICK      | intestinal cell (MAK-like) kinase (ICK), transcript variant 2, mRNA                                                      | -0.86         | 0.44        | -0.14        | 0.30       | -0.72           | 0.09    |
| Hs_12plexchip_4_5070  | v2HS_96066  | TATTGGGTACACTGTGGCCA     | NM_016513 | ICK      | intestinal cell (MAK-like) kinase (ICK), transcript variant 2, mRNA                                                      | -1.23         | 0.68        | -0.30        | 0.67       | -0.93           | 0.17    |



| Probe ID              | v2HS        | Sequence                | Accession    | Symbol   | Gene Name                                                                                                       | Mut log2 mean | Mut log2 SD | WT log2 Mean | WT log2 SD | log2 difference | P-value |
|-----------------------|-------------|-------------------------|--------------|----------|-----------------------------------------------------------------------------------------------------------------|---------------|-------------|--------------|------------|-----------------|---------|
| Hs_12plexchip_3_12688 | v2HS_244502 | ATCTTAGTGGGACTATTTGCA   | NM_012405    | ICMT     | isoprenylcysteine carboxyl methyltransferase (ICMT), mRNA                                                       | -0.93         | 0.18        | -0.14        | 0.41       | -0.79           | 0.06    |
| Hs0P00010589          | v2HS_28548  | GTTAAGTCAGACTCTCCGTGGT  | NM_012092    | ICOS     | inducible T-cell co-stimulator (ICOS), mRNA                                                                     | -1.73         | 0.21        | -0.89        | 0.42       | -0.84           | 0.06    |
| Hs_12plexchip_6_9268  | v2HS_22567  | TAAGAGACTGATACTGGATCCT  | M96843       | ID2B     | INHIBITOR OF DNA BINDING 2B, DOMINANT NEGATIVE HELIX-LOOP-HELIX PROTEIN                                         | -1.12         | 0.87        | 0.16         | 1.50       | -1.28           | 0.29    |
| Hs_12plexchip_5_8334  | v2HS_264362 | ATCGAGATACTTGTTGGTGGCG  | NM_022873    | IFI6     | interferon, alpha-inducible protein 6 (IFI6), transcript variant 3, mRNA                                        | -1.21         | 1.21        | 0.01         | 0.31       | -1.22           | 0.22    |
| Hs_12plexchip_3_8920  | v2HS_132251 | TTTACGTAAGCATTCCAGGGCT  | NM_001547    | IFIT2    | interferon-induced protein with tetratricopeptide repeats 2 (IFIT2), mRNA                                       | -0.99         | 0.23        | 0.24         | 0.30       | -1.22           | 0.01    |
| Hs_12plexchip_4_10272 | v2HS_194395 | TATAGAGTTTGCTAGAAGCCT   | NM_021002    | IFNA6    | interferon, alpha 6 (IFNA6), mRNA                                                                               | -1.15         | 0.82        | -0.42        | 0.45       | -0.73           | 0.26    |
| Hs_12plexchip_6_6547  | v2HS_161087 | ATATTTCATGGAGAATAGCAGGA | NM_020800    | IFT80    | intraflagellar transport 80 homolog (Chlamydomonas) (IFT80), mRNA                                               | -0.78         | 1.78        | 2.15         | 1.02       | -2.93           | 0.08    |
| Hs_12plexchip_4_7426  | v2HS_63065  | CTGTGGGTATAAGCATACTCC   | X93614       | IGHD3-16 | IMMUNOGLOBULIN HEAVY DIVERSITY 3-16                                                                             | -0.97         | 0.72        | 0.24         | 1.12       | -1.21           | 0.20    |
| Hs_12plexchip_3_2183  | v2HS_54618  | TAGTTACAACCCGAAATGTCAC  | M12025       | IGLV@    | IMMUNOGLOBULIN LAMBDA VARIABLE GROUP                                                                            | -0.70         | 0.27        | 0.08         | 0.37       | -0.79           | 0.05    |
| Hs_12plexchip_4_6153  | v2HS_27524  | ATAATTATGCTCTCAAACAGCC  | NM_003640    | IKBKAP   | inhibitor of kappa light polypeptide gene enhancer in B-cells, kinase complex-associated protein (IKBKAP), mRNA | -1.30         | 0.95        | 0.49         | 0.89       | -1.79           | 0.08    |
| Hs_12plexchip_5_6182  | v2HS_255250 | TTCATGAAGGTATCTAAGCGCA  | NM_001556    | IKBKB    | inhibitor of kappa light polypeptide gene enhancer in B-cells, kinase beta (IKBKB), mRNA                        | -0.96         | 0.77        | 0.15         | 0.46       | -1.10           | 0.11    |
| Hs_12plexchip_5_8872  | v2HS_263816 | ATAAAGAAACAATATCCCGCC   | NM_001079526 | IKZF2    | IKAROS family zinc finger 2 (Helios) (IKZF2), transcript variant 2, mRNA                                        | -0.98         | 0.34        | -0.26        | 0.19       | -0.71           | 0.05    |
| Hs0P00006032          | v2HS_132313 | TTTGACAGTGGGTGCCAGAGGT  | NM_001558    | IL10RA   | INTERLEUKIN 10 RECEPTOR, ALPHA                                                                                  | -0.75         | 0.61        | 0.25         | 0.30       | -1.01           | 0.09    |
| Hs_12plexchip_5_7783  | v2HS_266151 | TTCTTCAGTTGCTTAGAGGGCC  | AK095107     | IL1RAP   | INTERLEUKIN 1 RECEPTOR ACCESSORY PROTEIN                                                                        | -1.22         | 0.48        | -0.02        | 0.41       | -1.20           | 0.03    |
| Hs_12plexchip_6_8558  | v2HS_16605  | GAAAGGAAGGCCAATATCTTCC  | NM_003854    | IL1RL2   | interleukin 1 receptor-like 2 (IL1RL2), mRNA                                                                    | -0.96         | 1.00        | 0.61         | 0.53       | -1.57           | 0.09    |
| Hs_12plexchip_5_7608  | v2HS_227105 | TATTGTTATCAACTTTGGAGCA  | NM_181309    | IL22RA2  | interleukin 22 receptor, alpha 2 (IL22RA2), transcript variant 2, mRNA                                          | -0.70         | 0.28        | 0.37         | 0.15       | -1.07           | 0.01    |
| Hs_12plexchip_5_4294  | v2HS_257379 | TTTAAACAATCCAAGACAGGCC  | NM_006850    | IL24     | interleukin 24 (IL24), transcript variant 1, mRNA                                                               | -0.73         | 0.52        | 0.31         | 0.85       | -1.04           | 0.16    |
| Hs_12plexchip_6_1664  | v2HS_175429 | ATACAGTGGCTCAATTTCTGCC  | NM_018402    | IL26     | interleukin 26 (IL26), mRNA                                                                                     | -0.77         | 0.38        | 0.74         | 0.05       | -1.51           | 0.02    |
| Hs_12plexchip_3_11093 | v2HS_131086 | TTGTAGAAGCATGTGAAGCTGGG | NM_000878    | IL2RB    | interleukin 2 receptor, beta (IL2RB), mRNA                                                                      | -1.17         | 0.59        | -0.29        | 0.93       | -0.89           | 0.25    |
| Hs_12plexchip_6_10224 | v2HS_77306  | TATGTCTATAATCCACTGATTG  | NM_000206    | IL2RG    | interleukin 2 receptor, gamma (severe combined immunodeficiency) (IL2RG), mRNA                                  | -0.72         | 0.52        | 0.25         | 0.28       | -0.97           | 0.06    |
| Hs_12plexchip_5_10372 | v2HS_93693  | TTATTGAGATGAATGCATTGGT  | NM_000564    | IL5RA    | interleukin 5 receptor, alpha (IL5RA), transcript variant 1, mRNA                                               | -1.18         | 0.23        | -0.33        | 0.19       | -0.85           | 0.01    |
| Hs0P00010325          | v2HS_226020 | TTGCTATTGTATATTTCTCCCG  | NM_000584    | IL8      | INTERLEUKIN 8                                                                                                   | -1.13         | 1.00        | -0.32        | 0.53       | -0.82           | 0.30    |
| Hs_12plexchip_3_12824 | v2HS_48793  | ATTTCAACAACATTTCAACAGCA | NM_004515    | ILF2     | interleukin enhancer binding factor 2, 45kDa (ILF2), mRNA                                                       | -2.64         | 0.60        | -1.62        | 0.80       | -1.02           | 0.16    |
| Hs_12plexchip_5_7150  | v2HS_246159 | AATACGGTTGAGATTCTGGCCC  | NM_001014795 | ILK      | integrin-linked kinase (ILK), transcript variant 3, mRNA                                                        | -1.50         | 1.77        | 0.78         | 1.53       | -2.28           | 0.17    |
| Hs_12plexchip_3_2704  | v2HS_63421  | TACTACTAGAGGAACAACTGG   | NM_198218    | ING1     | inhibitor of growth family, member 1 (ING1), transcript variant 2, mRNA                                         | -0.70         | 0.23        | 0.01         | 0.74       | -0.71           | 0.23    |
| Hs_12plexchip_3_10131 | v2HS_139496 | AATAGTGGCGACAGTATACGGC  | NM_015693    | INTU     | inturned planar cell polarity effector homolog (Drosophila) (INTU), mRNA                                        | -1.08         | 0.31        | -0.38        | 0.51       | -0.70           | 0.13    |
| Hs0P00002117          | v2HS_65842  | TAAGCTGTACGGGCTCTTCTAT  | AF049893     | IPF1     | INSULIN PROMOTER FACTOR 1, HOMEODOMAIN TRANSCRIPTION FACTOR                                                     | -2.46         | 0.57        | -1.12        | 0.61       | -1.35           | 0.05    |
| Hs_12plexchip_2_6922  | v2HS_155619 | TTTCACTAGGGCTGTCACTGCC  | NM_018085    | IPO9     | importin 9 (IPO9), mRNA                                                                                         | -0.87         | 0.39        | -0.09        | 0.63       | -0.78           | 0.16    |
| Hs_12plexchip_5_11292 | v2HS_139323 | TTACCCATAAGGTCCAATGGA   | U12897       | IPW      | IMPRINTED IN PRADER-WILLI SYNDROME                                                                              | -0.77         | 0.55        | -0.04        | 0.14       | -0.72           | 0.14    |
| Hs0P00001242          | v2HS_1945   | ATTCTATTAATATACCGATTTC  | NM_007199    | IRAK3    | INTERLEUKIN-1 RECEPTOR-ASSOCIATED KINASE 3                                                                      | -0.77         | 0.72        | -0.03        | 0.22       | -0.74           | 0.21    |
| Hs_12plexchip_4_7333  | v2HS_72166  | TTGAAGAAGAACACGGGCGAGGG | NM_004136    | IREB2    | iron-responsive element binding protein 2 (IREB2), mRNA                                                         | -1.97         | 0.43        | -0.50        | 0.63       | -1.47           | 0.03    |
| Hs_12plexchip_3_11195 | v2HS_233988 | TTATATAGTCCATGGTGGCCT   | NM_030980    | ISG20L2  | interferon stimulated exonuclease gene 20kDa like 2 (ISG20L2), mRNA                                             | -1.48         | 0.22        | -0.67        | 0.38       | -0.80           | 0.05    |
| Hs_12plexchip_3_4753  | v2HS_116860 | ATTTGATTAGTCTGTCACTGCT  | NM_030790    | ITFG1    | integrin alpha FG-GAP repeat containing 1 (ITFG1), mRNA                                                         | -1.31         | 0.29        | -0.50        | 0.53       | -0.81           | 0.10    |
| Hs_12plexchip_4_9088  | v2HS_133433 | TAAGATTCTGCAATCTGCTCCT  | NM_002205    | ITGA5    | integrin, alpha 5 (fibronectin receptor, alpha polypeptide) (ITGA5), mRNA                                       | -1.97         | 1.44        | -0.57        | 0.93       | -1.40           | 0.24    |

| Probe ID              | v2HS        | Sequence                | Accession    | Symbol   | Gene Name                                                                                                               | Mut log2 mean | Mut log2 SD | WT log2 Mean | WT log2 SD | log2 difference | P-value |
|-----------------------|-------------|-------------------------|--------------|----------|-------------------------------------------------------------------------------------------------------------------------|---------------|-------------|--------------|------------|-----------------|---------|
| Hs0P00000643          | v2HS_67751  | ATTACCAAGGACACTCTATCTG  | NM_004867    | ITM2A    | integral membrane protein 2A (ITM2A), mRNA                                                                              | -1.05         | 0.62        | 0.00         | 0.16       | -1.05           | 0.09    |
| Hs_12plexchip_6_12091 | v2HS_162162 | AATTCCTGAGACCTCTTAACCA  | NM_203395    | IYD      | iodotyrosine deiodinase (IYD), mRNA                                                                                     | -0.72         | 0.24        | 0.22         | 0.82       | -0.94           | 0.18    |
| Hs_12plexchip_4_993   | v2HS_133559 | TTTACCACAAATCATACTGTCCC | NM_002227    | JAK1     | Janus kinase 1 (a protein tyrosine kinase) (JAK1), mRNA                                                                 | -1.98         | 0.31        | -0.56        | 0.50       | -1.42           | 0.02    |
| Hs_12plexchip_5_3991  | v2HS_91498  | ATAATGCTCCACACACTGTCCG  | NM_006618    | JARID1B  | jumonji, AT rich interactive domain 1B (JARID1B), mRNA                                                                  | -1.53         | 1.04        | -0.10        | 0.58       | -1.43           | 0.12    |
| Hs_12plexchip_3_11418 | v2HS_135205 | TTTGCATATGATCTCGAAACCA  | NM_016604    | JMJD1B   | jumonji domain containing 1B (JMJD1B), mRNA                                                                             | -1.70         | 0.36        | -0.66        | 0.61       | -1.04           | 0.08    |
| Hs_12plexchip_5_2459  | v2HS_250225 | TTTAAACAGAGACTTTGTGGCC  | NM_007064    | KALRN    | kalirin, RhoGEF kinase (KALRN), transcript variant 3, mRNA                                                              | -1.06         | 0.32        | -0.31        | 0.49       | -0.74           | 0.10    |
| Hs_12plexchip_5_933   | v2HS_247394 | TTATAATTTCTGGAATTGGCCA  | NM_005548    | KARS     | lysyl-tRNA synthetase (KARS), mRNA                                                                                      | -1.44         | 0.27        | -0.40        | 0.41       | -1.04           | 0.03    |
| Hs_12plexchip_5_3444  | v2HS_241931 | TTATGTTTAGTCCAACCTAAGGA | NM_152433    | KBTBD3   | kelch repeat and BTB (POZ) domain containing 3 (KBTBD3), transcript variant 1, mRNA                                     | -0.71         | 0.66        | 0.23         | 0.13       | -0.94           | 0.13    |
| Hs_12plexchip_3_456   | v2HS_52418  | ATATTATAAATACACACAGCA   | NM_020122    | KCMF1    | potassium channel modulatory factor 1 (KCMF1), mRNA                                                                     | -1.09         | 0.38        | 0.07         | 0.76       | -1.16           | 0.10    |
| Hs_12plexchip_5_6348  | v2HS_261861 | TATTAAGAGAGTCTGTGCTGCC  | NM_005549    | KCNA10   | potassium voltage-gated channel, shaker-related subfamily, member 10 (KCNA10), mRNA                                     | -1.01         | 0.41        | -0.05        | 0.06       | -0.96           | 0.05    |
| Hs_12plexchip_3_10869 | v2HS_133596 | TAACCAAGACCGAGACGATGGC  | NM_002234    | KCNA5    | potassium voltage-gated channel, shaker-related subfamily, member 5 (KCNA5), mRNA                                       | -2.06         | 0.92        | -0.74        | 1.25       | -1.32           | 0.22    |
| Hs_12plexchip_5_3965  | v2HS_203246 | ATGTAATACGGCGTGATTGCCA  | NM_172344    | KCNG3    | potassium voltage-gated channel, subfamily G, member 3 (KCNG3), transcript variant 2, mRNA                              | -1.92         | 1.09        | -0.81        | 0.48       | -1.11           | 0.21    |
| Hs_12plexchip_6_6202  | v2HS_224052 | TAAAGGCCCTTGATGGACGGCG  | NM_172347    | KCNG4    | potassium voltage-gated channel, subfamily G, member 4 (KCNG4), transcript variant 1, mRNA                              | -2.08         | 0.70        | -1.03        | 0.59       | -1.05           | 0.12    |
| Hs_12plexchip_5_6399  | v2HS_18665  | ATAGCGTCAGAGTAACCACGC   | NM_012285    | KCNH4    | potassium voltage-gated channel, subfamily H (eag-related), member 4 (KCNH4), mRNA                                      | -0.90         | 0.25        | 0.74         | 0.45       | -1.64           | 0.01    |
| Hs_12plexchip_4_207   | v2HS_160244 | AATATTCTCAAGACGTTGCCT   | NM_173162    | KCNH7    | potassium voltage-gated channel, subfamily H (eag-related), member 7 (KCNH7), transcript variant 2, mRNA                | -1.00         | 0.39        | 0.40         | 0.55       | -1.40           | 0.03    |
| Hs_12plexchip_4_4613  | v2HS_160241 | ATATCGATCCAGTTTCTGGCC   | NM_173162    | KCNH7    | potassium voltage-gated channel, subfamily H (eag-related), member 7 (KCNH7), transcript variant 2, mRNA                | -1.12         | 0.83        | 0.51         | 0.26       | -1.63           | 0.07    |
| Hs_12plexchip_3_9507  | v2HS_133627 | TATTCGTTGAAGTTTCATGGGC  | NM_002239    | KCNJ3    | potassium inwardly-rectifying channel, subfamily J, member 3 (KCNJ3), mRNA                                              | -0.84         | 0.27        | 0.24         | 0.21       | -1.07           | 0.01    |
| Hs_12plexchip_4_7194  | v2HS_65811  | ATCTCTTCTCACAATGCCTGTT  | NM_001014797 | KCNMA1   | potassium large conductance calcium-activated channel, subfamily M, alpha member 1 (KCNMA1), transcript variant 1, mRNA | -0.91         | 0.47        | 0.25         | 1.32       | -1.16           | 0.26    |
| Hs_12plexchip_3_3404  | v2HS_34562  | TTTCTCAAAGTGTCTCTGGCGG  | NM_019842    | KCNQ5    | potassium voltage-gated channel, KQT-like subfamily, member 5 (KCNQ5), mRNA                                             | -0.99         | 0.58        | -0.25        | 0.39       | -0.74           | 0.15    |
| Hs_12plexchip_4_135   | v2HS_218648 | ATGTACCTCCACAAGAGCAGGT  | NM_173605    | KCNRG    | potassium channel regulator (KCNRG), transcript variant 1, mRNA                                                         | -0.98         | 0.43        | 1.58         | 0.47       | -2.56           | 0.00    |
| Hs_12plexchip_6_12263 | v2HS_104098 | TAAGTTTCTGAGACTCAGTCCT  | NM_198503    | KCNT2    | potassium channel, subfamily T, member 2 (KCNT2), mRNA                                                                  | -1.43         | 0.98        | -0.23        | 1.34       | -1.20           | 0.28    |
| Hs_12plexchip_6_742   | v2HS_198117 | GATAATATACACATGAAGGCCA  | NM_014379    | KCNV1    | potassium channel, subfamily V, member 1 (KCNV1), mRNA                                                                  | -0.98         | 0.14        | -0.15        | 0.61       | -0.83           | 0.14    |
| Hs_12plexchip_5_3542  | v2HS_14575  | ATTCCATGTAAGAGTAAAGGCA  | NM_138444    | KCTD12   | potassium channel tetramerisation domain containing 12 (KCTD12), mRNA                                                   | -2.25         | 0.34        | -0.49        | 0.58       | -1.76           | 0.02    |
| Hs_12plexchip_3_10328 | v2HS_97671  | TTTGTCTTTGTCTCCATGTGGC  | NM_016121    | KCTD3    | potassium channel tetramerisation domain containing 3 (KCTD3), mRNA                                                     | -1.20         | 0.83        | -0.32        | 0.39       | -0.88           | 0.20    |
| Hs_12plexchip_5_9238  | v2HS_98989  | TTAAGGTGATGACATAGGCT    | NM_024089    | KDEL1    | KDEL (Lys-Asp-Glu-Leu) containing 1 (KDEL1), mRNA                                                                       | -1.04         | 0.47        | 0.25         | 0.19       | -1.29           | 0.03    |
| Hs_12plexchip_4_9985  | v2HS_198147 | TTTGCACCTGTAATTTGGCTTCC | NM_006558    | KHDRBS3  | KH domain containing, RNA binding, signal transduction associated 3 (KHDRBS3), mRNA                                     | -1.15         | 0.65        | -0.40        | 0.63       | -0.75           | 0.23    |
| Hs_12plexchip_5_1686  | v2HS_216731 | ATTGAGTTTAATATTCACTGCG  | NM_015050    | KIAA0082 | KIAA0082 (KIAA0082), mRNA                                                                                               | -0.90         | 0.05        | 0.61         | 0.44       | -1.51           | 0.03    |
| Hs_12plexchip_5_4566  | v2HS_73018  | AGAACTAGACACTTAATTTGGT  | NM_001029989 | KIAA0101 | KIAA0101 (KIAA0101), transcript variant 2, mRNA                                                                         | -1.30         | 0.27        | 0.01         | 0.05       | -1.31           | 0.01    |
| Hs_12plexchip_6_9040  | v2HS_285028 | ATTTGGTGTTACAAGGGCACGT  | NM_014792    | KIAA0125 | KIAA0125                                                                                                                | -0.97         | 0.74        | -0.04        | 0.12       | -0.94           | 0.16    |

| Probe ID              | v2HS        | Sequence                | Accession    | Symbol    | Gene Name                                                                                       | Mut log2 mean | Mut log2 SD | WT log2 Mean | WT log2 SD | log2 difference | P-value |
|-----------------------|-------------|-------------------------|--------------|-----------|-------------------------------------------------------------------------------------------------|---------------|-------------|--------------|------------|-----------------|---------|
| Hs_12plexchip_4_10174 | v2HS_95371  | TATTGTATAGATGGAGGCTGCG  | XM_941746    | KIAA0258  | PREDICTED:KIAA0258, transcript variant 3 (KIAA0258), mRNA                                       | -2.37         | 0.85        | 0.07         | 0.15       | -2.45           | 0.03    |
| Hs_12plexchip_5_9831  | v2HS_230811 | TAAATGCCAAGAGACTATCCC   | D87447       | KIAA0258  | KIAA0258                                                                                        | -1.14         | 0.30        | -0.09        | 0.22       | -1.05           | 0.01    |
| Hs_12plexchip_6_10424 | v2HS_225405 | TTATTCTAGGTCCTCGGGCT    | NM_014686    | KIAA0355  | KIAA0355 (KIAA0355), mRNA                                                                       | -0.97         | 0.30        | 0.93         | 1.61       | -1.90           | 0.17    |
| Hs_12plexchip_4_9094  | v2HS_74142  | TTTGCAATGCAGACTCTGTGC   | NM_014702    | KIAA0408  | KIAA0408 (KIAA0408), mRNA                                                                       | -0.87         | 0.64        | 0.07         | 0.84       | -0.93           | 0.21    |
| Hs_12plexchip_3_5502  | v2HS_120193 | TTTCTCCATGATTTTACCCCGT  | NM_015091    | KIAA0423  | KIAA0423 (KIAA0423), mRNA                                                                       | -0.77         | 0.38        | 0.01         | 0.74       | -0.78           | 0.20    |
| Hs_12plexchip_5_975   | v2HS_248634 | AAGTGTATGTTCCAATGACCCG  | NM_207306    | KIAA0495  | KIAA0495 (KIAA0495), mRNA                                                                       | -1.47         | 0.63        | -0.47        | 0.67       | -1.01           | 0.13    |
| Hs_12plexchip_5_4402  | v2HS_259524 | ATCTTCAACTATAGAATGTCT   | AB007978     | KIAA0509  | KIAA0509 PROTEIN                                                                                | -1.67         | 0.98        | 1.27         | 1.81       | -2.94           | 0.09    |
| Hs_12plexchip_5_5051  | v2HS_256709 | ATGGTTAAGGTCAAAGTTTGGC  | AB007978     | KIAA0509  | KIAA0509 PROTEIN                                                                                | -0.73         | 0.95        | 0.15         | 0.38       | -0.88           | 0.25    |
| Hs_12plexchip_4_422   | v2HS_202565 | TAGATACAAGAAAGAGGTGGCC  | AI278633     | KIAA0676  | KIAA0676 PROTEIN                                                                                | -1.68         | 0.66        | -0.90        | 0.31       | -0.78           | 0.17    |
| Hs0P00011684          | v2HS_53708  | TTCCAAAGGCCAATAACACCA   | NM_020701    | KIAA1160  | KIAA1160 PROTEIN                                                                                | -1.92         | 0.53        | -0.89        | 0.31       | -1.04           | 0.06    |
| Hs_12plexchip_3_3039  | v2HS_62688  | TAATGCCAATAGTTAGTGAGTC  | NM_015443    | KIAA1267  | KIAA1267 (KIAA1267), mRNA                                                                       | -0.89         | 0.32        | 0.18         | 0.56       | -1.06           | 0.06    |
| Hs_12plexchip_4_3337  | v2HS_222689 | ATCATTATTGGGAGAACATGGA  | NM_018330    | KIAA1598  | KIAA1598 (KIAA1598), mRNA                                                                       | -1.09         | 0.06        | -0.26        | 0.33       | -0.83           | 0.05    |
| Hs_12plexchip_5_2841  | v2HS_209056 | ATTTAACACGGCCACCAATGCTG | NM_020961    | KIAA1627  | KIAA1627 protein (KIAA1627), mRNA                                                               | -0.75         | 0.63        | 0.12         | 0.74       | -0.87           | 0.20    |
| Hs_12plexchip_5_6933  | v2HS_231987 | TTACTGATCCAGATGTTGTCCA  | NM_030636    | KIAA1706  | KIAA1706 protein (KIAA1706), mRNA                                                               | -1.01         | 0.36        | 0.39         | 1.64       | -1.40           | 0.27    |
| Hs_12plexchip_3_3109  | v2HS_60041  | TTTCTGAATGAGCTCTGTCC    | AB058746     | KIAA1843  | KIAA1843 PROTEIN                                                                                | -1.43         | 1.12        | -0.35        | 0.51       | -1.08           | 0.24    |
| Hs_12plexchip_2_5631  | v2HS_184080 | AACGGTTTCGGTGCAGGGAGCC  | BC036932     | KIAA1856  | KIAA1856 PROTEIN                                                                                | -1.69         | 0.53        | -0.60        | 0.62       | -1.09           | 0.08    |
| Hs0P0003088           | v2HS_40650  | ATTGTCAAAGCCTTCTGGCGC   | AB058778     | KIAA1875  | KIAA1875 PROTEIN                                                                                | -1.38         | 0.14        | -0.55        | 0.73       | -0.84           | 0.18    |
| Hs_12plexchip_5_1023  | v2HS_247406 | TTGTTCTCTAGGTAGAGCCGGC  | NM_199205    | KIAA1967  | KIAA1967 (KIAA1967), transcript variant 2, mRNA                                                 | -1.39         | 0.31        | -0.42        | 0.13       | -0.97           | 0.02    |
| Hs_12plexchip_3_1275  | v2HS_48561  | TTATGTACTTCTAGCATGGCT   | NM_004523    | KIF11     | kinesin family member 11 (KIF11), mRNA                                                          | -1.69         | 0.90        | -0.27        | 0.82       | -1.41           | 0.12    |
| Hs_12plexchip_3_7235  | v2HS_95809  | TATGTCTCTGACTTTACCTGCA  | NM_014875    | KIF14     | kinesin family member 14 (KIF14), mRNA                                                          | -1.27         | 0.47        | -0.43        | 0.50       | -0.84           | 0.10    |
| Hs_12plexchip_4_9195  | v2HS_78033  | ATTCCTGCTTATTCAGTGGCGC  | NM_006845    | KIF2C     | kinesin family member 2C (KIF2C), mRNA                                                          | -1.22         | 0.33        | -0.02        | 0.30       | -1.21           | 0.01    |
| Hs_12plexchip_6_752   | v2HS_202062 | ATTTATTGAGCTTCTCAGCA    | NM_012310    | KIF4A     | kinesin family member 4A (KIF4A), mRNA                                                          | -0.86         | 0.06        | 0.13         | 0.43       | -0.99           | 0.05    |
| Hs_12plexchip_5_6756  | v2HS_262283 | TTAATGTAGTCTTGACATGCT   | NM_004522    | KIF5C     | kinesin family member 5C (KIF5C), mRNA                                                          | -1.12         | 0.94        | 0.14         | 0.31       | -1.26           | 0.14    |
| Hs_12plexchip_4_697   | v2HS_76969  | TATGTCATACATTTACAGCAGGT | NM_000222    | KIT       | v-kit Hardy-Zuckerman 4 feline sarcoma viral oncogene homolog (KIT), transcript variant 1, mRNA | -0.87         | 0.42        | -0.14        | 0.44       | -0.73           | 0.10    |
| Hs_12plexchip_6_476   | v2HS_69732  | TAATACAGGGTGACCATCGCGG  | NM_175737    | KLB       | klotho beta (KLB), mRNA                                                                         | -2.55         | 1.12        | -0.55        | 1.80       | -2.00           | 0.19    |
| Hs_12plexchip_6_1429  | v2HS_235477 | ATGTGTAGATAATGGGAGGCA   | NM_016531    | KLF3      | Kruppel-like factor 3 (basic) (KLF3), mRNA                                                      | -0.88         | 0.71        | 0.14         | 0.38       | -1.01           | 0.12    |
| Hs_12plexchip_4_12291 | v2HS_80810  | AATGTCAGCAGTTCTCTCGGG   | NM_022480    | KLHL25    | kelch-like 25 (Drosophila) (KLHL25), mRNA                                                       | -1.20         | 0.69        | -0.01        | 0.36       | -1.19           | 0.08    |
| Hs_12plexchip_5_2310  | v2HS_252721 | TATGACTAAATGTTGGTGGCC   | NM_020803    | KLHL8     | kelch-like 8 (Drosophila) (KLHL8), mRNA                                                         | -0.77         | 2.01        | 1.50         | 1.20       | -2.27           | 0.18    |
| Hs_12plexchip_2_12443 | v2HS_216034 | ATTAAGGGAGATCTAGTGCTTA  | NM_144507    | KLK8      | kallikrein-related peptidase 8 (KLK8), transcript variant 4, mRNA                               | -0.86         | 0.35        | -0.14        | 0.61       | -0.72           | 0.17    |
| Hs_12plexchip_3_10158 | v2HS_238589 | ATTCCATTGGATTATACGCT    | NM_007334    | KLRD1     | killer cell lectin-like receptor subfamily D, member 1 (KLRD1), transcript variant 2, mRNA      | -1.19         | 0.94        | -0.05        | 1.26       | -1.14           | 0.28    |
| Hs_12plexchip_2_4006  | v2HS_85137  | TTTGAGATTGGGATGCGACCTG  | NM_001025231 | KPRP      | keratinocyte proline-rich protein (KPRP), mRNA                                                  | -1.52         | 0.42        | -0.36        | 0.77       | -1.16           | 0.10    |
| Hs_12plexchip_4_11729 | v2HS_169384 | TTTCTACTAGGACCATAGGCA   | NM_033360    | KRAS      | V-HA-RAS HARVEY RAT SARCOMA VIRAL ONCOGENE HOMOLOG                                              | -2.04         | 0.53        | -0.86        | 0.70       | -1.18           | 0.09    |
| Hs_12plexchip_5_1316  | v2HS_65213  | TGAATGACTCAAAGTAGGGCTC  | NM_006121    | KRT1      | keratin 1 (epidermolytic hyperkeratosis) (KRT1), mRNA                                           | -1.42         | 0.88        | -0.22        | 0.43       | -1.20           | 0.13    |
| Hs_12plexchip_4_11915 | v2HS_133836 | ATGGTCTGAAATGAGACTGGT   | NM_002278    | KRT32     | keratin 32 (KRT32), mRNA                                                                        | -2.35         | 1.31        | -0.30        | 0.44       | -2.05           | 0.10    |
| Hs_12plexchip_6_631   | v2HS_64836  | TTTGCATTTACGGCAATGACCC  | NM_080747    | KRT72     | keratin 72 (KRT72), mRNA                                                                        | -0.87         | 1.10        | 0.42         | 0.92       | -1.29           | 0.20    |
| Hs_12plexchip_3_1569  | v2HS_63207  | ATACATGGTGAGACAAGCTCTG  | NM_175858    | KRTAP11-1 | keratin associated protein 11-1 (KRTAP11-1), mRNA                                               | -1.33         | 0.05        | -0.55        | 0.65       | -0.78           | 0.17    |
| Hs_12plexchip_4_9050  | v2HS_22431  | TTTGCATTTGACTGACATGGCA  | NG_000940    | KRTHBP2   | KERATIN, HAIR, BASIC PSEUDOGENE 2                                                               | -1.84         | 0.29        | -0.67        | 0.80       | -1.17           | 0.12    |
| Hs_12plexchip_4_6009  | v2HS_22392  | TTACTCACAGATATTCACAGCA  | NG_000943    | KRTHBP3   | KERATIN, HAIR, BASIC PSEUDOGENE 3                                                               | -1.10         | 0.18        | -0.39        | 0.34       | -0.71           | 0.05    |
| Hs_12plexchip_4_9156  | v2HS_84597  | TTATACAGCCACTCAGAGGTCC  | NM_006762    | LAPTM5    | lysosomal associated multispinning membrane protein 5 (LAPTM5), mRNA                            | -1.23         | 0.98        | 0.05         | 0.43       | -1.28           | 0.14    |
| Hs_12plexchip_6_6205  | v2HS_233109 | ATGATACCAGCAGTTCTCGGG   | NM_031206    | LAS1L     | LAS1-like (S. cerevisiae) (LAS1L), mRNA                                                         | -2.35         | 0.67        | -1.14        | 1.20       | -1.22           | 0.22    |
| Hs0P00007022          | v2HS_99204  | TTTCCCTTAAACGCACITTCGG  | NM_031206    | LAS1L     | LAS1-like (S. cerevisiae) (LAS1L), mRNA                                                         | -1.87         | 0.47        | -1.01        | 0.33       | -0.86           | 0.07    |
| Hs_12plexchip_5_4850  | v2HS_74382  | TTAGGAGTACACTTGGGAGGGC  | NM_178438    | LCE5A     | late cornified envelope 5A (LCE5A), mRNA                                                        | -1.19         | 0.90        | 0.44         | 0.69       | -1.62           | 0.07    |
| Hs_12plexchip_4_1983  | v2HS_221457 | TTGAGAAATAAGCTCCCATGCT  | NG_001155    | LDHBP     | LACTATE DEHYDROGENASE B PSEUDOGENE                                                              | -1.44         | 0.24        | -0.51        | 0.60       | -0.94           | 0.10    |
| Hs_12plexchip_3_9093  | v2HS_138318 | ATTGCTCATCACATACTTACCT  | NM_032287    | LDOC1L    | leucine zipper, down-regulated in cancer 1-like (LDOC1L), mRNA                                  | -1.49         | 0.80        | -0.55        | 0.41       | -0.94           | 0.17    |
| Hs_12plexchip_5_9042  | v2HS_118360 | AATTTAAAGCGTACATCTGCCT  | NM_052971    | LEAP2     | liver expressed antimicrobial peptide 2 (LEAP2), mRNA                                           | -0.90         | 0.34        | 0.37         | 0.79       | -1.27           | 0.09    |

| Probe ID              | v2HS        | Sequence                 | Accession    | Symbol       | Gene Name                                                                                                                                                               | Mut log2 mean | Mut log2 SD | WT log2 Mean | WT log2 SD | log2 difference | P-value |
|-----------------------|-------------|--------------------------|--------------|--------------|-------------------------------------------------------------------------------------------------------------------------------------------------------------------------|---------------|-------------|--------------|------------|-----------------|---------|
| Hs_12plexchip_3_10487 | v2HS_237144 | TATATTAGCCCATGGCCCTGCC   | NM_002302    | LECT2        | leukocyte cell-derived chemotaxin 2 (LECT2), mRNA                                                                                                                       | -1.12         | 0.14        | -0.42        | 0.35       | -0.71           | 0.06    |
| Hs0P00007707          | v2HS_135851 | TTCTCTTGCTCTCTTTCTCTCT   | NM_024316    | LENG1        | leukocyte receptor cluster (LRC) member 1 (LENG1), mRNA                                                                                                                 | -1.92         | 0.70        | -0.96        | 0.85       | -0.95           | 0.21    |
| Hs_12plexchip_4_509   | v2HS_202898 | ATTCTTATGCACCTGGACTCGC   | NM_013975    | LIG3         | ligase III, DNA, ATP-dependent (LIG3), nuclear gene encoding mitochondrial protein, transcript variant alpha, mRNA                                                      | -1.11         | 0.49        | -0.21        | 0.40       | -0.89           | 0.07    |
| Hs_12plexchip_6_9628  | v2HS_245111 | TTGATACACCTCTCGAATAGCT   | NM_004664    | LIN7A        | lin-7 homolog A (C. elegans) (LIN7A), mRNA                                                                                                                              | -2.32         | 1.95        | -0.53        | 0.27       | -1.79           | 0.25    |
| Hs_12plexchip_2_5212  | v2HS_175213 | TATTCGGGATATATAGATTGGA   | NM_018362    | LIN7C        | lin-7 homolog C (C. elegans) (LIN7C), mRNA                                                                                                                              | -0.71         | 0.74        | 0.55         | 0.48       | -1.26           | 0.08    |
| Hs_12plexchip_5_1080  | v2HS_247651 | TAAACAGAAGAGATTGTCTCCA   | NM_006033    | LIPG         | lipase, endothelial (LIPG), mRNA                                                                                                                                        | -0.71         | 0.25        | 0.34         | 0.21       | -1.06           | 0.01    |
| Hs_12plexchip_6_5849  | v2HS_81001  | TTATTGAGTGACATGGAGAGGT   | NM_021819    | LMAN1L       | lectin, mannose-binding, 1 like (LMAN1L), mRNA                                                                                                                          | -1.84         | 0.04        | -1.06        | 0.81       | -0.79           | 0.24    |
| Hs_12plexchip_2_10956 | v2HS_30926  | TAAAGTTATGAAACCTCAGCT    | NM_001001395 | LMO3         | LIM domain only 3 (rhombotin-like 2) (LMO3), transcript variant 2, mRNA                                                                                                 | -0.91         | 0.25        | -0.19        | 0.46       | -0.71           | 0.10    |
| Hs_12plexchip_5_575   | v2HS_51161  | TTATGTGATGGAATTATACCCG   | NR_003590    | LOC100101117 | testis-specific transcript, Y-linked 2-like (LOC100101117) on chromosome Y                                                                                              | -1.78         | 1.13        | 0.59         | 1.44       | -2.37           | 0.09    |
| Hs0P00012482          | v2HS_51166  | ATATAGACAGAGATGGCATGCT   | NR_003590    | LOC100101117 | testis-specific transcript, Y-linked 2-like (LOC100101117) on chromosome Y                                                                                              | -0.80         | 0.35        | 0.04         | 0.32       | -0.83           | 0.04    |
| Hs_12plexchip_4_10838 | v2HS_217710 | TTTCTGTTTCATCTGCTCTGGG   | NM_001101321 | LOC120126    | hypothetical protein (LOC120126), mRNA                                                                                                                                  | -2.28         | 0.57        | -1.28        | 0.79       | -0.99           | 0.16    |
| Hs_12plexchip_5_2301  | v2HS_209586 | TTAGCATATTCTGCAGCTACTT   | XR_016217    | LOC120318    | PREDICTED:similar to 40S ribosomal protein S6 (LOC120318), mRNA                                                                                                         | -1.15         | 0.37        | 0.25         | 0.28       | -1.40           | 0.01    |
| Hs_12plexchip_5_3126  | v2HS_214370 | CTTCTTACAACACACTGGTGG    | XR_016217    | LOC120318    | PREDICTED:similar to 40S ribosomal protein S6 (LOC120318), mRNA                                                                                                         | -1.02         | 1.64        | 0.78         | 1.34       | -1.80           | 0.22    |
| Hs_12plexchip_6_6390  | v2HS_159427 | AATTGTGATCAAAGCTGTACCA   | XR_016411    | LOC121456    | PREDICTED:similar to solute carrier family 9, member 7 (LOC121456), mRNA                                                                                                | -1.35         | 1.00        | -0.02        | 0.41       | -1.32           | 0.14    |
| Hs_12plexchip_5_4991  | v2HS_259415 | TTGTATTTGCAATTAGCTGCCT   | XR_016263    | LOC121906    | PREDICTED:similar to Proteasome subunit alpha type 6 (Proteasome iota chain) (Macropain iota chain) (Multicatalytic endopeptidase complex iota chain) (LOC121906), mRNA | -1.29         | 0.45        | 0.01         | 0.46       | -1.30           | 0.02    |
| Hs_12plexchip_6_5637  | v2HS_191039 | TTGCCATGGATAAGTAATTGGT   | XR_017783    | LOC121981    | PREDICTED:similar to peptidyl-Pro cis trans isomerase (LOC121981), misc RNA                                                                                             | -0.74         | 0.39        | 0.00         | 0.43       | -0.74           | 0.09    |
| Hs_12plexchip_5_8984  | v2HS_263490 | TTTCATCTGTAGGGTGTAAACGGG | XM_928661    | LOC125242    | PREDICTED:similar to Keratin, type I cytoskeletal 18 (Cytokeratin-18) (CK-18) (Keratin-18) (K18) (LOC125242), mRNA                                                      | -0.96         | 0.38        | -0.07        | 0.30       | -0.89           | 0.04    |
| Hs_12plexchip_6_6734  | v2HS_161686 | TTATCAAGGGTCTATATTCCA    | BC015457     | LOC127841    | HYPOTHETICAL PROTEIN LOC127841                                                                                                                                          | -1.06         | 0.82        | -0.29        | 0.58       | -0.77           | 0.26    |
| Hs0P00001573          | v2HS_59672  | TTCTTTAATAGGAACATCTGGT   | XM_060943    | LOC128322    | PREDICTED:similar to Nuclear transport factor 2 (NTF-2) (LOC128322), mRNA                                                                                               | -1.41         | 0.11        | -0.71        | 0.40       | -0.70           | 0.08    |
| Hs_12plexchip_3_11184 | v2HS_237854 | ATTCAGTGGCCGGAGCAGTGGG   | XR_019305    | LOC129841    | PREDICTED:similar to laminin receptor 1 (ribosomal protein SA) (LOC129841), mRNA                                                                                        | -1.26         | 0.45        | -0.39        | 0.57       | -0.87           | 0.11    |
| Hs_12plexchip_6_7185  | v2HS_191934 | ATTGTAATTAGGAGCCAGTCGA   | XM_941747    | LOC130773    | PREDICTED:similar to 60S ribosomal protein L23a (LOC130773), mRNA                                                                                                       | -1.81         | 0.29        | -0.68        | 0.40       | -1.13           | 0.02    |
| Hs_12plexchip_5_202   | v2HS_41539  | ATCTGTATCACCTTAACAATC    | NR_003550    | LOC132430    | similar to poly(A) binding protein, cytoplasmic 4 (inducible form) (LOC132430) on chromosome 4                                                                          | -1.30         | 0.48        | -0.26        | 0.92       | -1.04           | 0.18    |
| Hs_12plexchip_4_6853  | v2HS_54846  | TTCTCCACTAAGATGGTTGGG    | AK023718     | LOC145474    | HYPOTHETICAL PROTEIN LOC145474                                                                                                                                          | -1.03         | 0.19        | -0.21        | 0.91       | -0.82           | 0.25    |
| Hs_12plexchip_5_3793  | v2HS_226918 | ATGCAGCATGACAAATCCAGGC   | XM_936571    | LOC146517    | PREDICTED:hypothetical protein LOC146517 (LOC146517), mRNA                                                                                                              | -0.73         | 0.37        | 0.24         | 1.23       | -0.97           | 0.30    |
| Hs_12plexchip_6_3784  | v2HS_181312 | ATAGATGGTTTCTGAGCATCGA   | AK125037     | LOC147791    | HYPOTHETICAL PROTEIN LOC147791                                                                                                                                          | -1.28         | 0.80        | -0.46        | 0.51       | -0.83           | 0.22    |
| Hs_12plexchip_4_3309  | v2HS_181356 | TTGAACCTCAAATAAAGCAGGGC  | BX647231     | LOC148145    | HYPOTHETICAL PROTEIN LOC148145                                                                                                                                          | -1.29         | 0.16        | -0.18        | 0.53       | -1.10           | 0.06    |
| Hs_12plexchip_5_9366  | v2HS_101498 | TTTAAGGCATGGTTTTCAGAGGA  | AK055155     | LOC149157    | HYPOTHETICAL PROTEIN LOC149157                                                                                                                                          | -1.12         | 0.78        | -0.42        | 0.11       | -0.71           | 0.25    |
| Hs_12plexchip_4_5768  | v2HS_26291  | GAACATAGTGACAGTCAGTGCA   | BC040263     | LOC150297    | HYPOTHETICAL PROTEIN LOC150297                                                                                                                                          | -1.63         | 0.49        | -0.15        | 0.60       | -1.48           | 0.03    |
| Hs_12plexchip_5_1522  | v2HS_68105  | TTAGGAGACGAGTTGTGGGTC    | BC064972     | LOC158435    | HYPOTHETICAL PROTEIN BC008050                                                                                                                                           | -0.79         | 0.32        | 0.50         | 0.06       | -1.29           | 0.02    |
| Hs_12plexchip_5_9047  | v2HS_120186 | ATTCTGTATAGATCTGGTCTCT   | NM_001014830 | LOC196913    | hypothetical protein LOC196913 (LOC196913), mRNA                                                                                                                        | -1.34         | 0.61        | 0.38         | 0.91       | -1.72           | 0.06    |
| Hs_12plexchip_6_3034  | v2HS_277821 | ATGCATCACTATCGTCAAGGGC   | AK023628     | LOC199725    | HYPOTHETICAL PROTEIN LOC199725                                                                                                                                          | -1.12         | 0.79        | 0.15         | 0.93       | -1.27           | 0.15    |
| Hs_12plexchip_5_8944  | v2HS_120340 | ATAATGGTCTACCTAGTTTGTCT  | NM_001008393 | LOC201725    | hypothetical protein LOC201725 (LOC201725), mRNA                                                                                                                        | -0.91         | 0.58        | 0.45         | 1.32       | -1.36           | 0.21    |
| Hs_12plexchip_3_11259 | v2HS_141037 | TAAGACTGCTCATGTGTGAGGC   | AK055023     | LOC219690    | HYPOTHETICAL PROTEIN LOC219690                                                                                                                                          | -1.46         | 1.20        | -0.40        | 0.07       | -1.06           | 0.27    |

| Probe ID              | v2HS        | Sequence                | Accession    | Symbol    | Gene Name                                                                                                                                                                        | Mut log2 mean | Mut log2 SD | WT log2 Mean | WT log2 SD | log2 difference | P-value |
|-----------------------|-------------|-------------------------|--------------|-----------|----------------------------------------------------------------------------------------------------------------------------------------------------------------------------------|---------------|-------------|--------------|------------|-----------------|---------|
| Hs_12plexchip_3_10147 | v2HS_141322 | TACGCAAAACGACATAAATGCC  | XM_001130636 | LOC221091 | PREDICTED:similar to hypothetical protein (LOC221091), mRNA                                                                                                                      | -1.60         | 0.41        | -0.75        | 0.76       | -0.85           | 0.18    |
| Hs_12plexchip_5_11871 | v2HS_141208 | ATGCCATCTAGGAATATCCGA   | BC033371     | LOC221946 | HYPOTHETICAL PROTEIN LOC221946                                                                                                                                                   | -2.10         | 0.22        | -1.07        | 0.85       | -1.03           | 0.16    |
| Hs_12plexchip_5_4716  | v2HS_258133 | CTGATCTCTGATAATATGGCGT  | XM_172860    | LOC255649 | PREDICTED:similar to oocyte secreted protein 1 (LOC255649), mRNA                                                                                                                 | -1.71         | 0.82        | 0.67         | 2.21       | -2.38           | 0.20    |
| Hs_12plexchip_4_1689  | v2HS_213536 | ATTCTGATGAATGGCTGGCT    | BC039539     | LOC255654 | HYPOTHETICAL PROTEIN LOC255654                                                                                                                                                   | -1.25         | 0.75        | 0.89         | 0.17       | -2.14           | 0.03    |
| Hs_12plexchip_2_4978  | v2HS_168749 | TATCTAGATGCCTCTGCCTGCT  | NR_001286    | LOC260339 | processed pseudogene mtTFA 3 (LOC260339) on chromosome 6                                                                                                                         | -1.29         | 0.49        | -0.34        | 1.08       | -0.95           | 0.26    |
| Hs_12plexchip_5_3914  | v2HS_254656 | TTCTAGCAAGAGAACCATCTT   | XM_208043    | LOC283116 | PREDICTED:similar to Tripartite motif protein 49 (RING finger protein 18) (Testis-specific ring-finger protein) (LOC283116), mRNA                                                | -0.75         | 0.67        | 0.81         | 1.07       | -1.56           | 0.11    |
| Hs_12plexchip_5_778   | v2HS_245259 | TTATGGCACATTTCGTTACGCT  | XM_208043    | LOC283116 | PREDICTED:similar to Tripartite motif protein 49 (RING finger protein 18) (Testis-specific ring-finger protein) (LOC283116), mRNA                                                | -3.63         | 0.44        | 0.06         | 3.54       | -3.69           | 0.21    |
| Hs_12plexchip_4_2518  | v2HS_182453 | TTTCTCTTTCAGATTGGTTCT   | XM_378312    | LOC283143 | PREDICTED:hypothetical protein LOC283143 (LOC283143), mRNA                                                                                                                       | -0.85         | 0.61        | 0.65         | 0.20       | -1.50           | 0.04    |
| Hs_12plexchip_6_11076 | v2HS_182508 | TTTCTCTTCTCTTCACATCCA   | AK091446     | LOC283194 | HYPOTHETICAL PROTEIN LOC283194                                                                                                                                                   | -1.27         | 0.22        | -0.25        | 0.24       | -1.02           | 0.01    |
| Hs_12plexchip_3_8982  | v2HS_131660 | TACAAATAGCACAGGAGGACCC  | XM_497352    | LOC283412 | PREDICTED:similar to 60S ribosomal protein L29 (Cell surface heparin-binding protein HIP) (LOC283412), mRNA                                                                      | -1.66         | 0.17        | -0.28        | 0.77       | -1.39           | 0.08    |
| Hs_12plexchip_5_9355  | v2HS_100281 | AACGAAAGTCCATGAATGTCCA  | NM_178514    | LOC283487 | HYPOTHETICAL PROTEIN LOC283487                                                                                                                                                   | -2.17         | 0.79        | -1.26        | 0.42       | -0.91           | 0.18    |
| Hs0P00007920          | v2HS_142836 | TTACCCTGTCAATCTGTCTCCC  | AK092322     | LOC283575 | HYPOTHETICAL PROTEIN LOC283575                                                                                                                                                   | -1.80         | 0.69        | -0.55        | 0.65       | -1.25           | 0.08    |
| Hs_12plexchip_6_11763 | v2HS_163979 | ATGCTGTAATAGTGTCTGAGCT  | AK097486     | LOC283738 | HYPOTHETICAL PROTEIN LOC283738                                                                                                                                                   | -1.20         | 0.53        | 0.59         | 0.40       | -1.79           | 0.01    |
| Hs0P00008258          | v2HS_142129 | ATGATCTCTCCATGCAGACCA   | XR_017053    | LOC284226 | PREDICTED:similar to kinesin family member 1C (LOC284226), mRNA                                                                                                                  | -2.37         | 0.50        | -1.32        | 0.47       | -1.05           | 0.06    |
| Hs_12plexchip_5_10591 | v2HS_103411 | ATAAGTTGTGGGTTTCATCTGGG | AK097672     | LOC284344 | HYPOTHETICAL PROTEIN LOC284344                                                                                                                                                   | -1.53         | 0.49        | -0.10        | 0.44       | -1.43           | 0.02    |
| Hs_12plexchip_5_9148  | v2HS_103423 | ATCAGCTCTCCAGAGAACAGGC  | NR_002938    | LOC284379 | solute carrier family 7 (cationic amino acid transporter, y+ system), member 3 pseudogene (LOC284379) on chromosome 19                                                           | -1.13         | 0.23        | 0.00         | 0.22       | -1.14           | 0.00    |
| Hs_12plexchip_6_2724  | v2HS_182880 | TTAATCGCGAGACAATACGGG   | AK094324     | LOC284408 | HYPOTHETICAL PROTEIN LOC284408                                                                                                                                                   | -1.27         | 0.83        | 0.25         | 0.44       | -1.52           | 0.07    |
| Hs_12plexchip_6_3557  | v2HS_223527 | TTATGCAATCTTCGTGTACCT   | BC036876     | LOC284898 | HYPOTHETICAL PROTEIN LOC284898                                                                                                                                                   | -0.79         | 0.66        | 0.24         | 0.79       | -1.03           | 0.16    |
| Hs_12plexchip_2_9250  | v2HS_21776  | TTAAGGCAACAAATAGTGTCTGT | XM_373030    | LOC285556 | PREDICTED:hypothetical protein LOC285556 (LOC285556), mRNA                                                                                                                       | -1.08         | 0.60        | 0.21         | 0.60       | -1.30           | 0.06    |
| Hs_12plexchip_6_12232 | v2HS_194538 | ATTTGAGACAATGTCTATGCCCT | AK091672     | LOC286161 | HYPOTHETICAL PROTEIN LOC286161                                                                                                                                                   | -1.08         | 0.47        | -0.35        | 0.81       | -0.73           | 0.26    |
| Hs_12plexchip_6_11682 | v2HS_190151 | AAGAGATTGAGCAATCAAAGCG  | XR_018534    | LOC286348 | PREDICTED:hypothetical protein LOC286348 (LOC286348), mRNA                                                                                                                       | -4.20         | 1.18        | -0.93        | 2.40       | -3.27           | 0.13    |
| Hs_12plexchip_5_3258  | v2HS_254721 | TTCAGGTCTATATCAATGGCT   | XR_017027    | LOC286495 | PREDICTED:similar to Tetra-tryptophan repeat protein 3 (TPR repeat protein 3) (TPR repeat protein D) (LOC286495), mRNA                                                           | -0.96         | 0.55        | 0.18         | 0.69       | -1.14           | 0.09    |
| Hs_12plexchip_2_336   | v2HS_102466 | CTGCAGTGGTAGGTTCTCTGGG  | XM_497238    | LOC338586 | PREDICTED:similar to hydroxysteroid dehydrogenase like 2 (LOC338586), mRNA                                                                                                       | -1.77         | 0.51        | -1.00        | 0.82       | -0.76           | 0.26    |
| Hs_12plexchip_4_5868  | v2HS_25313  | AATGGGAAGGAGGAAACAGCGT  | BC043002     | LOC339298 | HYPOTHETICAL PROTEIN LOC339298                                                                                                                                                   | -1.23         | 0.50        | -0.40        | 0.34       | -0.83           | 0.08    |
| Hs_12plexchip_4_1442  | v2HS_213268 | ATGGTGAATGATCTTAGCGGTG  | XM_291007    | LOC339766 | PREDICTED:hypothetical protein LOC339766 (LOC339766), mRNA                                                                                                                       | -1.10         | 0.51        | -0.02        | 0.10       | -1.08           | 0.06    |
| Hs0P00004455          | v2HS_240580 | TAGGCTTTGATGCTCATGCGGC  | XM_290345    | LOC339799 | SIMILAR TO EUKARYOTIC TRANSLATION INITIATION FACTOR 3, SUBUNIT 5 EPSILON, 47KDA                                                                                                  | -2.45         | 0.86        | -1.30        | 0.19       | -1.15           | 0.14    |
| Hs_12plexchip_6_3131  | v2HS_222390 | TATTACTCTCATATCCTCAGCA  | BC042977     | LOC340094 | HYPOTHETICAL PROTEIN LOC340094                                                                                                                                                   | -0.71         | 0.22        | 0.03         | 0.82       | -0.74           | 0.26    |
| Hs_12plexchip_2_5841  | v2HS_185922 | TTAGAACAGGTCAACAGTCCCA  | BC042751     | LOC340239 | HYPOTHETICAL PROTEIN LOC340239                                                                                                                                                   | -0.91         | 0.16        | 0.04         | 0.77       | -0.95           | 0.16    |
| Hs_12plexchip_4_3340  | v2HS_219782 | TTAGTATGAGCCTGGTGTCCCT  | AK074459     | LOC340335 | HYPOTHETICAL PROTEIN LOC340335                                                                                                                                                   | -1.16         | 0.53        | 0.41         | 1.13       | -1.57           | 0.12    |
| Hs_12plexchip_3_5583  | v2HS_227339 | TACTCTCTGGTATCAGGCCCA   | XR_017303    | LOC341056 | PREDICTED:similar to Ubiquitin-like 1-activating enzyme E1A (SUMO-1-activating enzyme subunit 1) (LOC341056), mRNA                                                               | -1.38         | 0.65        | -0.44        | 0.69       | -0.94           | 0.16    |
| Hs_12plexchip_2_3848  | v2HS_73359  | ATTGCAAAATGGAAGCACGTGGT | XR_017487    | LOC341689 | PREDICTED:similar to Cutaneous T-cell lymphoma-associated antigen 5 (cTAGE-5 protein) (cTAGE family member 5) (Meningioma-expressed antigen 6/11) (MEA6/MEA11) (LOC341689), mRNA | -1.11         | 0.43        | -0.38        | 0.41       | -0.72           | 0.10    |
| Hs_12plexchip_5_8133  | v2HS_263836 | ATAGCAGTACTCAGCCTACGTT  | XM_936951    | LOC342293 | PREDICTED:similar to ATP-binding cassette transporter sub-family A member 15 (LOC342293), mRNA                                                                                   | -0.70         | 0.64        | 0.21         | 0.74       | -0.91           | 0.18    |

| Probe ID              | v2HS        | Sequence                | Accession    | Symbol    | Gene Name                                                                                                                                                                                                  | Mut log2 mean | Mut log2 SD | WT log2 Mean | WT log2 SD | log2 difference | P-value |
|-----------------------|-------------|-------------------------|--------------|-----------|------------------------------------------------------------------------------------------------------------------------------------------------------------------------------------------------------------|---------------|-------------|--------------|------------|-----------------|---------|
| Hs_12plexchip_6_11223 | v2HS_194223 | TTCTTGATAAAATTTGAGGGCCT | XM_294581    | LOC347292 | PREDICTED:similar to ribosomal protein L36 (LOC347292), mRNA                                                                                                                                               | -1.84         | 1.47        | -0.55        | 0.64       | -1.29           | 0.27    |
| Hs_12plexchip_6_11679 | v2HS_162290 | TTTGGCAAGTCTTTGCATGGCC  | NM_001010895 | LOC375748 | RAD26L hypothetical protein (LOC375748), mRNA                                                                                                                                                              | -1.89         | 1.48        | -0.45        | 0.35       | -1.43           | 0.23    |
| Hs0P00007277          | v2HS_103048 | TTTGCAGGGCACCTACTCAGGA  | BC040665     | LOC387790 | HYPOTHETICAL LOC387790                                                                                                                                                                                     | -0.85         | 0.41        | -0.13        | 0.36       | -0.72           | 0.09    |
| Hs_12plexchip_5_11429 | v2HS_271522 | ATGCTGCTTAAGAGCCTATGCA  | XM_370697    | LOC387867 | PREDICTED:similar to 40S ribosomal protein SA (p40) (34/67 kDa laminin receptor) (Colon carcinoma laminin-binding protein) (NEM/1CHD4) (Multidrug resistance-associated protein MGr1-Ag) (LOC387867), mRNA | -2.64         | 0.59        | -1.73        | 0.24       | -0.91           | 0.10    |
| Hs_12plexchip_6_6813  | v2HS_285588 | TTACCACAACAATATGTACCCA  | NM_207376    | LOC387882 | HYPOTHETICAL PROTEIN                                                                                                                                                                                       | -1.58         | 0.56        | 0.38         | 0.73       | -1.97           | 0.02    |
| Hs0P00004001          | v2HS_41456  | TTTCTTGGGCTCCTTAGAAGCT  | XR_018003    | LOC388242 | PREDICTED:LOC112869 pseudogene (LOC388242), misc RNA                                                                                                                                                       | -0.86         | 0.59        | 0.50         | 0.31       | -1.36           | 0.04    |
| Hs_12plexchip_3_10622 | v2HS_145157 | ATCAAGGTATCTGTCTCAGCC   | XM_371825    | LOC389396 | PREDICTED:similar to BXMAS2-10 protein (LOC389396), mRNA                                                                                                                                                   | -1.99         | 0.82        | -0.93        | 0.66       | -1.06           | 0.16    |
| Hs_12plexchip_3_11361 | v2HS_237760 | TAAGTGGTAATGCTTCATACCA  | NM_001089587 | LOC389435 | hCG21078 (LOC389435), mRNA                                                                                                                                                                                 | -1.44         | 0.08        | -0.34        | 0.25       | -1.10           | 0.01    |
| Hs_12plexchip_4_6577  | v2HS_53836  | TTTCCTGAGGATGCTGTGGGCC  | XM_372343    | LOC390031 | PREDICTED:similar to Ssu72 RNA polymerase II CTD phosphatase homolog (LOC390031), mRNA                                                                                                                     | -0.77         | 1.00        | 0.59         | 0.94       | -1.35           | 0.16    |
| Hs_12plexchip_5_1502  | v2HS_66351  | TTTGACAATGTCACCTCTGTTG  | XR_019377    | LOC391081 | PREDICTED:similar to 3 beta-hydroxysteroid dehydrogenase/delta 5--4-isomerase type I (3Beta-HSD I) (Trophoblast antigen FDO161G) (LOC391081), mRNA                                                         | -1.78         | 0.35        | -0.38        | 0.95       | -1.40           | 0.11    |
| Hs_12plexchip_6_7316  | v2HS_244097 | TTCTGGTAAGTGGAGGTGCCAA  | XR_017118    | LOC391106 | PREDICTED:similar to Voltage-dependent anion-selective channel protein 1 (VDAC-1) (hVDAC1) (Outer mitochondrial membrane protein porin 1) (Plasmalemmal porin) (Porin 31HL) (Porin 31HM) (LOC391106), mRNA | -1.12         | 0.72        | -0.35        | 0.35       | -0.77           | 0.20    |
| Hs_12plexchip_5_10900 | v2HS_274679 | TACATTAAGCAGAGTAATCCA   | XR_018908    | LOC391135 | PREDICTED:similar to ribosomal protein L4 (LOC391135), mRNA                                                                                                                                                | -3.85         | 0.94        | -1.92        | 1.60       | -1.93           | 0.16    |
| Hs0P00001342          | v2HS_70326  | TTGCTTCAAGTGTGGATGGCT   | XR_017648    | LOC391592 | PREDICTED:similar to basic leucine zipper and W2 domains 1 (LOC391592), mRNA                                                                                                                               | -0.98         | 0.25        | 0.39         | 0.09       | -1.37           | 0.01    |
| Hs_12plexchip_4_6431  | v2HS_64664  | ATCAGCAAACACAGGTGCAGTG  | XR_019056    | LOC391640 | PREDICTED:similar to Heterogeneous nuclear ribonucleoprotein A1 (Helix-stabilizing protein) (Single-strand RNA-binding protein) (hnRNP core protein A1) (HDP) (LOC391640), mRNA                            | -1.04         | 1.40        | 0.51         | 1.72       | -1.55           | 0.30    |
| Hs_12plexchip_6_10802 | v2HS_52910  | GTAATCTTCTGAATGGTGCCT   | XM_373042    | LOC391722 | PREDICTED:similar to myosin regulatory light chain-like (LOC391722), mRNA                                                                                                                                  | -1.54         | 1.32        | -0.23        | 0.88       | -1.31           | 0.24    |
| Hs_12plexchip_4_8574  | v2HS_21735  | ATACGATGTACAGCAAAGCGAC  | XR_016978    | LOC391777 | PREDICTED:similar to 40S ribosomal protein S4, X isoform (LOC391777), mRNA                                                                                                                                 | -2.95         | 0.75        | -1.48        | 1.11       | -1.47           | 0.14    |
| Hs0P00000848          | v2HS_61787  | TTTCCTCTCAGACCGTTTCTC   | XR_016640    | LOC391798 | PREDICTED:similar to Importin alpha-2 subunit (Karyopherin alpha-2 subunit) (SRP1-alpha) (RAG cohort protein 1) (LOC391798), mRNA                                                                          | -0.92         | 0.55        | -0.06        | 0.30       | -0.86           | 0.10    |
| Hs_12plexchip_3_12388 | v2HS_23953  | AACTTCTTGCAGTTGTTGCGGC  | XR_019520    | LOC392424 | PREDICTED:similar to ribosomal protein S5 (LOC392424), mRNA                                                                                                                                                | -2.30         | 0.10        | -1.38        | 0.10       | -0.92           | 0.00    |
| Hs_12plexchip_6_12330 | v2HS_124337 | TTGTATCTATGTTGAAGTGCC   | XR_016360    | LOC392452 | PREDICTED:hypothetical LOC392452 (LOC392452), mRNA                                                                                                                                                         | -0.82         | 0.43        | 0.01         | 0.25       | -0.83           | 0.06    |
| Hs_12plexchip_2_4525  | v2HS_182180 | TTATCTGGTGAGAATCTATGGT  | AK097673     | LOC399706 | HYPOTHETICAL LOC399706                                                                                                                                                                                     | -1.04         | 0.57        | -0.17        | 0.32       | -0.86           | 0.10    |
| Hs_12plexchip_6_1327  | v2HS_95865  | ATTGGAAGTACTTTAGCTCGA   | XR_019557    | LOC400061 | PREDICTED:similar to CDK105 protein (LOC400061), mRNA                                                                                                                                                      | -3.56         | 0.95        | -0.92        | 2.71       | -2.64           | 0.23    |
| Hs_12plexchip_6_1934  | v2HS_95868  | TTCATTGCAGACATGTATGGCT  | XR_019557    | LOC400061 | PREDICTED:similar to CDK105 protein (LOC400061), mRNA                                                                                                                                                      | -1.79         | 0.95        | -0.92        | 0.70       | -0.87           | 0.27    |
| Hs_12plexchip_6_11984 | v2HS_192962 | TTTATCTGGCAATCCAAGGCT   | XR_018253    | LOC401197 | PREDICTED:similar to ribosomal protein L7-like 1 (LOC401197), mRNA                                                                                                                                         | -2.15         | 0.28        | -0.45        | 0.16       | -1.71           | 0.00    |
| Hs0P00004694          | v2HS_121075 | TTATCATCAAGGTGCGCGCC    | XR_017915    | LOC401242 | PREDICTED:hypothetical gene supported by AK055503 (LOC401242), misc RNA                                                                                                                                    | -1.40         | 0.69        | -0.46        | 1.07       | -0.94           | 0.28    |

| Probe ID              | v2HS        | Sequence                | Accession    | Symbol    | Gene Name                                                                                                                                                                                                  | Mut log2 mean | Mut log2 SD | WT log2 Mean | WT log2 SD | log2 difference | P-value |
|-----------------------|-------------|-------------------------|--------------|-----------|------------------------------------------------------------------------------------------------------------------------------------------------------------------------------------------------------------|---------------|-------------|--------------|------------|-----------------|---------|
| Hs_12plexchip_6_582   | v2HS_63127  | TTTACACAGGATATGGGCTGTT  | XR_017359    | LOC401825 | PREDICTED:similar to MKI67 FHA domain-interacting nucleolar phosphoprotein (Nucleolar protein interacting with the FHA domain of pKI-67) (hNIFK) (Nucleolar phosphoprotein Nopp34) (LOC401825), mRNA       | -2.14         | 0.32        | -0.83        | 1.62       | -1.32           | 0.29    |
| Hs_12plexchip_6_11164 | v2HS_122980 | TACTTCTCACAGTCCACCTGGA  | XR_019598    | LOC401864 | PREDICTED:similar to Chloride intracellular channel protein 1 (Nuclear chloride ion channel 27) (NCC27) (Chloride channel ABP) (Regulatory nuclear chloride ion channel protein) (hRNCC) (LOC401864), mRNA | -0.97         | 0.69        | 0.16         | 1.35       | -1.13           | 0.29    |
| Hs_12plexchip_3_11638 | v2HS_222868 | TTGGCATAAGACTTAATGACCT  | XR_019345    | LOC402142 | PREDICTED:similar to proteasome (prosome, macropain) 26S subunit, ATPase 2 (LOC402142), mRNA                                                                                                               | -1.63         | 1.30        | -0.53        | 0.46       | -1.11           | 0.28    |
| Hs_12plexchip_3_1643  | v2HS_66260  | TTCTGCAAGGTTCTTGACCTCT  | XR_017047    | LOC402229 | PREDICTED:similar to splicing factor 4 (LOC402229), mRNA                                                                                                                                                   | -0.87         | 0.29        | 0.74         | 1.29       | -1.61           | 0.16    |
| Hs_12plexchip_6_390   | v2HS_72079  | TAAGGAAATATTCTGATGCCCA  | NM_001089591 | LOC440567 | hCG25371 (LOC440567), mRNA                                                                                                                                                                                 | -1.22         | 1.53        | 0.43         | 1.87       | -1.65           | 0.30    |
| Hs_12plexchip_6_8626  | v2HS_93802  | TAGGACATGTCCAGCAGCTGGT  | XM_496442    | LOC440733 | PREDICTED:similar to 40S ribosomal protein S15 (RIG protein) (LOC440733), mRNA                                                                                                                             | -1.91         | 1.37        | -0.61        | 0.15       | -1.30           | 0.24    |
| Hs_12plexchip_2_4388  | v2HS_185686 | TAGCAGATCACCTCGAAGCGGC  | XM_498961    | LOC441005 | PREDICTED:hypothetical LOC441005 (LOC441005), mRNA                                                                                                                                                         | -1.21         | 1.30        | -0.11        | 0.46       | -1.10           | 0.28    |
| Hs_12plexchip_6_12168 | v2HS_165316 | ATCAACTTTCGTGGAATCTGGG  | XM_496697    | LOC441018 | PREDICTED:similar to UDP-glucuronosyltransferase 2B7 precursor (UDPGT) (3,4-catechol estrogen specific) (UDPGTh-2) (LOC441018), mRNA                                                                       | -1.23         | 0.34        | 0.26         | 0.22       | -1.49           | 0.01    |
| Hs_12plexchip_2_9741  | v2HS_17568  | TACACTCCAACCTTGAAGCTGGT | XR_016245    | LOC441066 | PREDICTED:hypothetical LOC441066 (LOC441066), mRNA                                                                                                                                                         | -1.22         | 0.89        | -0.20        | 0.77       | -1.02           | 0.21    |
| Hs_12plexchip_2_10710 | v2HS_20689  | TTTAATACCAGGCCATTGCCCT  | BC039003     | LOC441086 | HYPOTHETICAL GENE SUPPORTED BY BC039003                                                                                                                                                                    | -1.17         | 0.19        | -0.18        | 0.84       | -1.00           | 0.17    |
| Hs0P00007564          | v2HS_105466 | ATCTGGAGGTGGAATGATGGCC  | XM_499019    | LOC441119 | PREDICTED:hypothetical LOC441119 (LOC441119), mRNA                                                                                                                                                         | -1.31         | 0.45        | -0.39        | 0.31       | -0.92           | 0.05    |
| Hs0P00011576          | v2HS_188312 | TAAATAACTGTGAGAACATGGG  | NR_003536    | LOC441246 | hCG1983332 (LOC441246) on chromosome 7                                                                                                                                                                     | -1.95         | 0.10        | -0.75        | 0.66       | -1.20           | 0.08    |
| Hs_12plexchip_6_11150 | v2HS_192295 | TTCAGAAATGCCTCTGATTGCT  | XM_496991    | LOC441377 | PREDICTED:similar to 40S ribosomal protein S26 (LOC441377), mRNA                                                                                                                                           | -0.81         | 0.56        | 0.35         | 1.02       | -1.17           | 0.18    |
| Hs_12plexchip_5_422   | v2HS_35267  | ATTGTAGTGCTCTTCTGGCCC   | XR_016738    | LOC442114 | PREDICTED:similar to keratin 19 (LOC442114), mRNA                                                                                                                                                          | -2.78         | 0.90        | -1.43        | 1.31       | -1.34           | 0.22    |
| Hs_12plexchip_3_11451 | v2HS_131616 | TATATGCATACCTTGATGGCC   | XR_016559    | LOC442232 | PREDICTED:similar to 60S ribosomal protein L17 (L23) (LOC442232), mRNA                                                                                                                                     | -1.13         | 1.12        | -0.17        | 0.53       | -0.96           | 0.28    |
| Hs_12plexchip_5_1110  | v2HS_57651  | TAAGGTGAATACAAAGATTGGA  | XR_016559    | LOC442232 | PREDICTED:similar to 60S ribosomal protein L17 (L23) (LOC442232), mRNA                                                                                                                                     | -0.76         | 0.21        | 0.00         | 0.15       | -0.76           | 0.01    |
| Hs_12plexchip_5_10471 | v2HS_267422 | TTTGTACTAGCTTCATGTTGGT  | XR_016496    | LOC442240 | PREDICTED:similar to zinc finger protein 259 (LOC442240), mRNA                                                                                                                                             | -1.32         | 0.13        | 0.10         | 1.09       | -1.42           | 0.15    |
| Hs_12plexchip_3_12450 | v2HS_242842 | ATAGTAGTACACGGAGATGCGG  | NR_003598    | LOC442308 | similar to tubulin, beta 5 (LOC442308) on chromosome 7                                                                                                                                                     | -0.79         | 0.33        | 0.00         | 0.80       | -0.79           | 0.22    |
| Hs_12plexchip_4_2527  | v2HS_182104 | TTTGATAAAGTGCTGTGTCCT   | XR_018022    | LOC442332 | PREDICTED:hypothetical LOC442332 (LOC442332), mRNA                                                                                                                                                         | -2.42         | 0.48        | -1.44        | 0.70       | -0.98           | 0.13    |
| Hs_12plexchip_6_9650  | v2HS_263491 | TATTGCCTGAGAGATGATGGCC  | NM_016490    | LOC51252  | hypothetical protein LOC51252 (LOC51252), mRNA                                                                                                                                                             | -0.78         | 1.01        | 0.09         | 0.25       | -0.87           | 0.27    |
| Hs_12plexchip_2_7890  | v2HS_166302 | TTAGGGAACCATATGGGAGCCC  | XR_016138    | LOC642319 | PREDICTED:similar to transgelin 2 (LOC642319), mRNA                                                                                                                                                        | -0.94         | 0.56        | 0.05         | 0.61       | -0.99           | 0.11    |
| Hs_12plexchip_6_6839  | v2HS_219398 | TAATGCTACCATGGTGTGGCT   | XR_016431    | LOC642397 | PREDICTED:similar to WAS protein homology region 2 domain containing 1 (LOC642397), mRNA                                                                                                                   | -0.70         | 0.30        | 0.12         | 0.42       | -0.82           | 0.06    |
| Hs_12plexchip_4_130   | v2HS_182227 | TTATTAGTGGGAGTCTGAGTC   | XM_942991    | LOC642934 | PREDICTED:hypothetical LOC642934 (LOC642934), mRNA                                                                                                                                                         | -0.72         | 0.16        | 0.03         | 0.33       | -0.75           | 0.04    |
| Hs_12plexchip_6_7221  | v2HS_251202 | ATAGAATCTCTCAAGAGGGC    | XR_016235    | LOC642979 | PREDICTED:similar to sorting nexin associated golgi protein 1 (LOC642979), mRNA                                                                                                                            | -0.87         | 0.88        | 0.19         | 0.44       | -1.06           | 0.16    |
| Hs_12plexchip_4_6761  | v2HS_61543  | TAGCAAGTAGATGGACAGGCT   | XR_016378    | LOC643579 | PREDICTED:hypothetical LOC643579 (LOC643579), mRNA                                                                                                                                                         | -0.80         | 1.06        | 0.41         | 0.84       | -1.21           | 0.20    |

| Probe ID              | v2HS        | Sequence               | Accession    | Symbol    | Gene Name                                                                                                                                                                                                                           | Mut log2 mean | Mut log2 SD | WT log2 Mean | WT log2 SD | log2 difference | P-value |
|-----------------------|-------------|------------------------|--------------|-----------|-------------------------------------------------------------------------------------------------------------------------------------------------------------------------------------------------------------------------------------|---------------|-------------|--------------|------------|-----------------|---------|
| Hs_12plexchip_4_10604 | v2HS_12094  | ATATCCCACACTACTTCTGGT  | XM_938941    | LOC643790 | PREDICTED:similar to Nonhistone chromosomal protein HMG-14 (High-mobility group nucleosome-binding domain-containing protein 1) (LOC643790), mRNA                                                                                   | -1.98         | 0.75        | -0.68        | 1.13       | -1.30           | 0.18    |
| Hs_12plexchip_5_11559 | v2HS_144280 | TAGTTGCTACAAGGACCATGGT | XM_927548    | LOC644402 | PREDICTED:hypothetical LOC644402 (LOC644402), mRNA                                                                                                                                                                                  | -1.05         | 0.19        | 0.44         | 0.28       | -1.49           | 0.00    |
| Hs_12plexchip_6_4787  | v2HS_180581 | ATTCTGTAAGTCTTTGCTACCA | XR_018194    | LOC644415 | PREDICTED:similar to prohibitin (LOC644415), mRNA                                                                                                                                                                                   | -1.47         | 1.46        | 0.16         | 0.27       | -1.63           | 0.19    |
| Hs_12plexchip_4_5837  | v2HS_25353  | CTTCACCTTGGCTTTATCTCT  | XM_927624    | LOC644498 | PREDICTED:similar to Nonhistone chromosomal protein HMG-17 (High-mobility group nucleosome-binding domain-containing protein 2) (LOC644498), mRNA                                                                                   | -2.66         | 0.34        | -1.77        | 0.76       | -0.89           | 0.17    |
| Hs_12plexchip_3_6812  | v2HS_229870 | CTCATATGCAACATTAGGGCC  | XR_019446    | LOC644616 | PREDICTED:similar to interleukin enhancer binding factor 2 (LOC644616), mRNA                                                                                                                                                        | -0.82         | 0.79        | 1.90         | 1.41       | -2.71           | 0.06    |
| Hs_12plexchip_2_10359 | v2HS_32694  | ATTAATAAGTGCTGTGACACCA | XM_927812    | LOC644717 | PREDICTED:similar to sarcoma antigen 1 (LOC644717), mRNA                                                                                                                                                                            | -1.41         | 0.45        | -0.34        | 0.13       | -1.07           | 0.05    |
| Hs_12plexchip_6_6067  | v2HS_190051 | ATGCATACAGTGAGCCGACGCC | XM_928136    | LOC645100 | PREDICTED:similar to CG11699-PA (LOC645100), mRNA                                                                                                                                                                                   | -1.28         | 0.57        | 0.54         | 1.07       | -1.82           | 0.08    |
| Hs_12plexchip_5_11696 | v2HS_134507 | TATATCCCACTGGAAAGTGCA  | XR_017268    | LOC645175 | PREDICTED:similar to Protein C2orf4 (C21orf19-like protein) (LOC645175), mRNA                                                                                                                                                       | -0.94         | 0.20        | -0.18        | 0.20       | -0.76           | 0.01    |
| Hs_12plexchip_6_2617  | v2HS_180920 | TTGAGGTACTGAGCAGGTGCT  | XR_016939    | LOC645382 | PREDICTED:similar to PRAME family member 10 (LOC645382), mRNA                                                                                                                                                                       | -1.09         | 1.14        | 0.24         | 0.21       | -1.33           | 0.18    |
| Hs_12plexchip_3_5357  | v2HS_119370 | TTGATCATCTCCAGGAGCCGCC | XR_016930    | LOC645412 | PREDICTED:similar to 40S ribosomal protein S16 (LOC645412), mRNA                                                                                                                                                                    | -2.69         | 0.55        | -1.24        | 0.49       | -1.45           | 0.03    |
| Hs_12plexchip_4_3476  | v2HS_180644 | TTAATCCTCGAAAGAGTTCCT  | XR_016872    | LOC645430 | PREDICTED:hypothetical LOC645430 (LOC645430), mRNA                                                                                                                                                                                  | -1.19         | 0.16        | -0.33        | 0.61       | -0.86           | 0.13    |
| Hs_12plexchip_6_12616 | v2HS_163195 | TTGTGTATGTGGACGATGTCCA | XR_017007    | LOC645614 | PREDICTED:similar to sorting nexin associated golgi protein 1 (LOC645614), mRNA                                                                                                                                                     | -1.33         | 0.31        | -0.52        | 0.57       | -0.81           | 0.12    |
| Hs_12plexchip_6_7300  | v2HS_188155 | ATCTCCTCATATCTCTTGGC   | XR_017484    | LOC645715 | PREDICTED:similar to eukaryotic translation elongation factor 1 alpha 2 (LOC645715), mRNA                                                                                                                                           | -0.89         | 0.53        | 0.19         | 0.71       | -1.08           | 0.11    |
| Hs_12plexchip_3_2510  | v2HS_69667  | GTAGTGGAGGAGATTACTTTGC | XR_016928    | LOC645773 | PREDICTED:similar to tubulin, alpha 1 (LOC645773), mRNA                                                                                                                                                                             | -0.80         | 0.33        | 0.05         | 0.26       | -0.85           | 0.03    |
| Hs_12plexchip_3_2564  | v2HS_69670  | CATCAGCTTGAACCTGTGGTCC | XR_016928    | LOC645773 | PREDICTED:similar to tubulin, alpha 1 (LOC645773), mRNA                                                                                                                                                                             | -1.58         | 0.65        | -0.68        | 0.34       | -0.90           | 0.12    |
| Hs_12plexchip_6_12808 | v2HS_193874 | ATCTTGGACAAGTTAGCTCCA  | XR_016831    | LOC645808 | PREDICTED:similar to 60 kDa heat shock protein, mitochondrial precursor (Hsp60) (60 kDa chaperonin) (CPN60) (Heat shock protein 60) (HSP-60) (Mitochondrial matrix protein P1) (P60 lymphocyte protein) (HuCHA60) (LOC645808), mRNA | -2.30         | 0.91        | -0.22        | 1.24       | -2.08           | 0.08    |
| Hs_12plexchip_5_11513 | v2HS_274830 | TAGGGTGGACAATACTGAGGCC | XR_019608    | LOC646048 | PREDICTED:similar to cytoplasmic beta-actin (LOC646048), mRNA                                                                                                                                                                       | -0.92         | 0.96        | -0.13        | 0.31       | -0.79           | 0.29    |
| Hs_12plexchip_6_2510  | v2HS_161718 | TTTCGGGAGCTGCTTCAGTGCC | NM_001101401 | LOC646643 | similar to protein kinase Bsk146 (LOC646643), mRNA                                                                                                                                                                                  | -0.88         | 0.66        | 0.14         | 0.40       | -1.03           | 0.09    |
| Hs0P00011059          | v2HS_192822 | AACTCAGCTCCTTACAAGGGCT | XM_929703    | LOC646753 | PREDICTED:similar to 40S ribosomal protein S26 (LOC646753), mRNA                                                                                                                                                                    | -1.28         | 0.03        | -0.50        | 0.25       | -0.78           | 0.03    |
| Hs_12plexchip_6_2822  | v2HS_184074 | TTTCTTCACTCCTCTGTACGCC | XM_935722    | LOC646762 | PREDICTED:hypothetical protein LOC646762 (LOC646762), mRNA                                                                                                                                                                          | -1.56         | 0.62        | -0.12        | 0.31       | -1.44           | 0.04    |
| Hs_12plexchip_3_11479 | v2HS_233964 | AATTCTTGGACATGGTTTCT   | XR_017618    | LOC647039 | PREDICTED:similar to Death domain-containing protein CRADD (Caspase and RIP adapter with death domain) (RIP-associated protein with a death domain) (LOC647039), mRNA                                                               | -1.08         | 0.46        | 0.41         | 0.48       | -1.49           | 0.02    |
| Hs_12plexchip_3_7313  | v2HS_94974  | TATCAATATCTTCTCATGGCT  | XR_017416    | LOC647073 | PREDICTED:similar to Signal recognition particle 72 kDa protein (SRP72) (LOC647073), mRNA                                                                                                                                           | -0.96         | 0.66        | -0.24        | 0.37       | -0.73           | 0.19    |
| Hs_12plexchip_4_2826  | v2HS_181661 | ATAGGAGAACCCCTTCTAGCC  | XM_001129735 | LOC647123 | PREDICTED:similar to Rieske iron-sulfur protein (LOC647123), mRNA                                                                                                                                                                   | -2.14         | 0.42        | -0.99        | 1.06       | -1.14           | 0.19    |



| Probe ID              | v2HS        | Sequence                | Accession    | Symbol    | Gene Name                                                                                                                                                      | Mut log2 mean | Mut log2 SD | WT log2 Mean | WT log2 SD | log2 difference | P-value |
|-----------------------|-------------|-------------------------|--------------|-----------|----------------------------------------------------------------------------------------------------------------------------------------------------------------|---------------|-------------|--------------|------------|-----------------|---------|
| Hs0P00012092          | v2HS_189672 | TTCCACGCGGATTTGGCTGGCG  | XM_934407    | LOC647131 | PREDICTED:hypothetical LOC647131 (LOC647131), mRNA                                                                                                             | -0.73         | 0.57        | 0.52         | 0.47       | -1.26           | 0.04    |
| Hs_12plexchip_2_6794  | v2HS_165807 | ATCGACTGTAGGGGAGATGGGCC | XM_930163    | LOC647145 | PREDICTED:similar to Splicing factor, arginine/serine-rich, 46kD (LOC647145), mRNA                                                                             | -0.71         | 0.45        | 0.40         | 0.58       | -1.11           | 0.06    |
| Hs_12plexchip_5_10137 | v2HS_107164 | AATTAACAGGTTGATCGGCA    | XM_930163    | LOC647145 | PREDICTED:similar to Splicing factor, arginine/serine-rich, 46kD (LOC647145), mRNA                                                                             | -0.92         | 0.26        | 0.36         | 0.32       | -1.28           | 0.01    |
| Hs_12plexchip_3_8689  | v2HS_101886 | AATTCTACCAATCTCTAGCCA   | XR_018477    | LOC648987 | PREDICTED:hypothetical LOC648987 (LOC648987), mRNA                                                                                                             | -1.52         | 0.32        | 0.11         | 0.27       | -1.64           | 0.00    |
| Hs_12plexchip_3_5574  | v2HS_224813 | GTAGAGCTGTAATGAGTTTGGC  | XR_018674    | LOC649925 | PREDICTED:hypothetical LOC649925 (LOC649925), mRNA                                                                                                             | -0.77         | 0.26        | 0.87         | 0.68       | -1.64           | 0.04    |
| Hs_12plexchip_5_9695  | v2HS_268515 | AATTATTGTGGAAGTGTGAGTG  | XM_939249    | LOC650167 | PREDICTED:similar to zinc finger protein 617 (LOC650167), mRNA                                                                                                 | -0.76         | 0.08        | 0.31         | 0.19       | -1.07           | 0.00    |
| Hs_12plexchip_5_7718  | v2HS_121873 | TTCATGGTGGACATTCTAAGGT  | XM_940582    | LOC651430 | PREDICTED:hypothetical LOC651430 (LOC651430), mRNA                                                                                                             | -1.44         | 0.34        | -0.44        | 0.34       | -1.00           | 0.02    |
| Hs_12plexchip_2_425   | v2HS_93650  | ATAACAATGCTCTTTGGTGCCC  | XM_942001    | LOC652522 | PREDICTED:similar to Werner syndrome protein (LOC652522), mRNA                                                                                                 | -0.79         | 0.73        | -0.03        | 0.37       | -0.75           | 0.21    |
| Hs_12plexchip_3_12580 | v2HS_242292 | TTAATCTTGAACCTTGGAGGCT  | XR_019381    | LOC652549 | PREDICTED:similar to SNW domain-containing protein 1 (Nuclear protein SKIP) (Ski-interacting protein) (Nuclear receptor coactivator NCoA-62) (LOC652549), mRNA | -1.51         | 0.44        | -0.11        | 0.35       | -1.39           | 0.01    |
| Hs_12plexchip_4_1504  | v2HS_205865 | TTATTGAAGAAACCAATCTGG   | XM_942509    | LOC652826 | PREDICTED:similar to 26S protease regulatory subunit 6B (MIP224) (MB67-interacting protein) (TAT-binding protein 7) (TBP-7) (LOC652826), mRNA                  | -1.94         | 0.18        | -0.93        | 0.52       | -1.01           | 0.06    |
| Hs0P00000274          | v2HS_67557  | TTCTGGATTCATGTCAGGCCCG  | AK096379     | LOC653466 | HYPOTHETICAL PROTEIN LOC401589                                                                                                                                 | -1.30         | 0.61        | -0.22        | 0.79       | -1.09           | 0.14    |
| Hs_12plexchip_6_5621  | v2HS_69578  | TTGAGTTCAGTCATTGCTGCCT  | NM_001097610 | LOC653486 | similar to secretoglobin, family 1C, member 1 (LOC653486), mRNA                                                                                                | -0.90         | 0.33        | 0.18         | 0.69       | -1.08           | 0.09    |
| Hs_12plexchip_4_7297  | v2HS_61213  | GTTCTCTGAGATTGAGTGAGGG  | NR_003528    | LOC653501 | zinc finger protein 658 pseudogene (LOC653501) on chromosome 9                                                                                                 | -0.79         | 0.56        | 0.36         | 1.09       | -1.15           | 0.20    |
| Hs_12plexchip_5_5042  | v2HS_258204 | TTTACAGCATTTCGAATCGGCC  | XM_927769    | LOC653506 | PREDICTED:similar to meteorin, glial cell differentiation regulator-like (LOC653506), mRNA                                                                     | -0.92         | 0.30        | -0.08        | 0.46       | -0.84           | 0.07    |
| Hs_12plexchip_5_11384 | v2HS_142082 | AATATGATGCTCATGATGCCCA  | XM_001126126 | LOC727910 | PREDICTED:hypothetical protein LOC727910 (LOC727910), mRNA                                                                                                     | -1.85         | 0.80        | -0.61        | 1.07       | -1.24           | 0.19    |
| Hs0P00000340          | v2HS_66915  | TTCTGATCTCAGTTGAGCACTC  | XM_001126453 | LOC727915 | PREDICTED:hypothetical protein LOC727915 (LOC727915), mRNA                                                                                                     | -0.85         | 0.24        | -0.07        | 0.76       | -0.78           | 0.21    |
| Hs_12plexchip_6_12462 | v2HS_191564 | AATTCACAAAGCGAGTGAGGT   | XR_015346    | LOC728128 | PREDICTED:similar to 60S ribosomal protein L7a (LOC728128), mRNA                                                                                               | -4.04         | 0.59        | -1.40        | 2.49       | -2.65           | 0.20    |
| Hs0P00008004          | v2HS_144610 | TTCCTCAGAACTTCGATTCGC   | XM_001126653 | LOC728135 | PREDICTED:similar to Protein C21orf63 precursor (SUE21) (LOC728135), mRNA                                                                                      | -1.15         | 0.33        | -0.40        | 0.36       | -0.75           | 0.06    |
| Hs_12plexchip_5_5284  | v2HS_72858  | ATCTTCCACATGCTCTCTGTC   | XM_001131465 | LOC728434 | PREDICTED:hypothetical protein LOC728434 (LOC728434), mRNA                                                                                                     | -1.59         | 0.36        | -0.65        | 0.91       | -0.95           | 0.20    |
| Hs_12plexchip_2_8266  | v2HS_153489 | ATAATCCAGGAGTATATAACCA  | XR_015916    | LOC729466 | PREDICTED:hypothetical protein LOC729466 (LOC729466), mRNA                                                                                                     | -1.27         | 1.17        | -0.28        | 0.67       | -0.99           | 0.29    |
| Hs_12plexchip_5_1807  | v2HS_253397 | AACGACATAGAAGTTGCTCTCT  | XM_001130823 | LOC729623 | PREDICTED:similar to cAMP-dependent protein kinase type I-beta regulatory subunit (LOC729623), mRNA                                                            | -1.06         | 0.79        | 0.30         | 1.13       | -1.36           | 0.17    |
| Hs_12plexchip_6_8207  | v2HS_218098 | TTGTGGTCTCAGAGCCTGCGGT  | XM_001131329 | LOC729792 | PREDICTED:hypothetical protein LOC729792 (LOC729792), mRNA                                                                                                     | -1.48         | 0.27        | -0.44        | 1.07       | -1.04           | 0.23    |
| Hs_12plexchip_5_634   | v2HS_41661  | TAAGGACTCCGAAGAACTGGT   | XM_001131663 | LOC729890 | PREDICTED:hypothetical protein LOC729890 (LOC729890), mRNA                                                                                                     | -1.64         | 0.48        | 0.06         | 0.65       | -1.70           | 0.03    |
| Hs0P00007175          | v2HS_108059 | TAGATTTGAGGTTAGATGGGCT  | XM_001131998 | LOC729995 | PREDICTED:hypothetical protein LOC729995 (LOC729995), mRNA                                                                                                     | -1.20         | 0.60        | -0.40        | 0.68       | -0.80           | 0.20    |
| Hs_12plexchip_5_5556  | v2HS_117690 | TTTATTGCAGGTTCCAACCGGG  | XM_001132025 | LOC730000 | PREDICTED:similar to testis-specific serine kinase 6 (LOC730000), mRNA                                                                                         | -1.35         | 0.42        | -0.24        | 0.57       | -1.10           | 0.06    |
| Hs0P00002514          | v2HS_61516  | TTTGCTCCTGCCCTGAGGCTT   | XM_001132293 | LOC730072 | PREDICTED:hypothetical protein LOC730072 (LOC730072), mRNA                                                                                                     | -1.44         | 0.31        | -0.71        | 0.32       | -0.73           | 0.05    |

| Probe ID              | v2HS        | Sequence                | Accession    | Symbol    | Gene Name                                                                                                           | Mut log2 mean | Mut log2 SD | WT log2 Mean | WT log2 SD | log2 difference | P-value |
|-----------------------|-------------|-------------------------|--------------|-----------|---------------------------------------------------------------------------------------------------------------------|---------------|-------------|--------------|------------|-----------------|---------|
| Hs_12plexchip_6_5734  | v2HS_191108 | TATTAACAATCCTCCGTGGA    | NR_003370    | LOC730092 | RRN3 RNA polymerase I transcription factor homolog ( <i>S. cerevisiae</i> ) pseudogene (LOC730092) on chromosome 16 | -0.99         | 0.70        | 0.12         | 1.24       | -1.11           | 0.27    |
| Hs_12plexchip_2_1732  | v2HS_81993  | ATTGTTTAGCACGCAGACTGCC  | XM_001133022 | LOC730222 | PREDICTED:similar to Tubulin alpha-2 chain (Alpha-tubulin 2) (LOC730222), mRNA                                      | -1.17         | 0.68        | -0.34        | 0.23       | -0.83           | 0.16    |
| Hs_12plexchip_5_3665  | v2HS_254576 | ATAATGAGTAACCTCAGAAGGC  | XM_001124597 | LOC730411 | PREDICTED:similar to zinc finger and BTB domain containing 8 (LOC730411), mRNA                                      | -1.10         | 0.24        | 1.08         | 0.08       | -2.18           | 0.00    |
| Hs_12plexchip_6_5649  | v2HS_100710 | TTGCATAAATTCAGGAGCCT    | XM_001128811 | LOC731210 | PREDICTED:similar to Protein MICAL-3 (LOC731210), mRNA                                                              | -1.21         | 0.11        | 0.16         | 1.02       | -1.37           | 0.14    |
| Hs_12plexchip_4_5390  | v2HS_22009  | ATGTATAGTCACATGAATGCCT  | AK023635     | LOC90246  | HYPOTHETICAL PROTEIN LOC90246                                                                                       | -0.93         | 0.26        | 0.52         | 0.61       | -1.44           | 0.04    |
| Hs_12plexchip_4_3293  | v2HS_179882 | ATTAGGGTGTAGAATTGATGGT  | AL080202     | LOC92249  | HYPOTHETICAL PROTEIN LOC92249                                                                                       | -0.76         | 0.21        | 0.61         | 0.35       | -1.38           | 0.01    |
| Hs_12plexchip_5_3279  | v2HS_14425  | TAACACTACAAAACAGCAGAGGT | NM_024778    | LONRF3    | LON peptidase N-terminal domain and ring finger 3 (LONRF3), transcript variant 2, mRNA                              | -0.76         | 0.54        | 0.03         | 0.69       | -0.80           | 0.19    |
| Hs_12plexchip_6_8694  | v2HS_238170 | TTGCCTGTGCATGGATCTCGT   | NM_002318    | LOXL2     | lysyl oxidase-like 2 (LOXL2), mRNA                                                                                  | -1.49         | 0.23        | -0.75        | 0.29       | -0.74           | 0.03    |
| Hs_12plexchip_5_9470  | v2HS_267470 | TAGTTGTTCCAGCAGCTACAGCT | NM_001008701 | LPHN1     | latrophilin 1 (LPHN1), transcript variant 1, mRNA                                                                   | -0.88         | 0.63        | 0.11         | 0.75       | -0.99           | 0.16    |
| Hs_12plexchip_6_12384 | v2HS_142522 | TTATTGAGGAGCTCATGAGCT   | NM_201550    | LRRC10    | LEUCINE RICH REPEAT CONTAINING 10                                                                                   | -1.80         | 1.01        | -0.15        | 0.49       | -1.65           | 0.09    |
| Hs_12plexchip_5_1241  | v2HS_247143 | TTATACAAAGAGTTGGTCCCGA  | NM_005512    | LRRC32    | leucine rich repeat containing 32 (LRRC32), mRNA                                                                    | -1.54         | 0.08        | 0.47         | 0.94       | -2.01           | 0.06    |
| Hs_12plexchip_4_10281 | v2HS_18850  | TGATACTTCAATTCAGTGGG    | NM_144620    | LRRC39    | leucine rich repeat containing 39 (LRRC39), mRNA                                                                    | -0.77         | 0.38        | 0.09         | 0.50       | -0.86           | 0.08    |
| Hs_12plexchip_4_1632  | v2HS_214960 | ATAACAAGCTCATCTAGCCA    | NM_020873    | LRRN1     | leucine rich repeat neuronal 1 (LRRN1), mRNA                                                                        | -1.61         | 0.95        | -0.18        | 1.17       | -1.43           | 0.18    |
| Hs0P00007114          | v2HS_96960  | ATTCTTCTAAAGTGGGAGGGC   | NM_015564    | LRRTM2    | leucine rich repeat transmembrane neuronal 2 (LRRTM2), mRNA                                                         | -1.42         | 0.71        | -0.38        | 0.18       | -1.05           | 0.12    |
| Hs_12plexchip_6_8446  | v2HS_214377 | CATAAATTCGCTCATCTAGGCT  | NM_014463    | LSM3      | LSM3 homolog, U6 small nuclear RNA associated ( <i>S. cerevisiae</i> ) (LSM3), mRNA                                 | -0.89         | 0.70        | -0.15        | 0.49       | -0.74           | 0.22    |
| Hs_12plexchip_3_420   | v2HS_50487  | TTTCCTTACTCTTTCATCAC    | NM_012322    | LSM5      | LSM5 homolog, U6 small nuclear RNA associated ( <i>S. cerevisiae</i> ) (LSM5), mRNA                                 | -1.92         | 0.85        | -0.01        | 0.35       | -1.92           | 0.04    |
| Hs_12plexchip_4_8205  | v2HS_134081 | TTCATACAGCTTCTGCACGGCC  | NM_001001438 | LSS       | lanosterol synthase (2,3-oxidosqualene-lanosterol cyclase) (LSS), transcript variant 2, mRNA                        | -1.23         | 0.77        | -0.44        | 0.49       | -0.79           | 0.22    |
| Hs_12plexchip_3_7032  | v2HS_229857 | TTAGACGTATAAAGCCTTGGCT  | NM_000428    | LTBP2     | latent transforming growth factor beta binding protein 2 (LTBP2), mRNA                                              | -1.28         | 0.37        | -0.26        | 1.04       | -1.01           | 0.23    |
| Hs_12plexchip_3_11090 | v2HS_134105 | ATCAGTCCAGCAGAATGAGGC   | NM_002344    | LTK       | leukocyte tyrosine kinase (LTK), transcript variant 1, mRNA                                                         | -0.97         | 0.48        | -0.04        | 0.27       | -0.93           | 0.06    |
| Hs_12plexchip_6_6188  | v2HS_158471 | AATGGGAGCTAGGGAGAGACGA  | NM_025261    | LY6G6C    | lymphocyte antigen 6 complex, locus G6C (LY6G6C), mRNA                                                              | -1.44         | 0.26        | -0.62        | 0.41       | -0.82           | 0.05    |
| Hs_12plexchip_5_4694  | v2HS_258799 | TAATTGAAATGGGTATTGCAT   | NM_015364    | LY96      | lymphocyte antigen 96 (LY96), mRNA                                                                                  | -0.79         | 0.62        | 0.01         | 0.08       | -0.80           | 0.15    |
| Hs_12plexchip_6_1730  | v2HS_202025 | TTAATCCTCCGTACAGTCACGT  | NM_001003787 | LYK5      | protein kinase LYK5 (LYK5), transcript variant 1, mRNA                                                              | -1.02         | 0.48        | 0.08         | 0.87       | -1.10           | 0.15    |
| Hs_12plexchip_5_4662  | v2HS_260496 | TTTCTATTCTGATGGCGTGCT   | NM_000081    | LYST      | lysosomal trafficking regulator (LYST), mRNA                                                                        | -1.34         | 0.63        | -0.51        | 0.38       | -0.83           | 0.14    |
| Hs_12plexchip_6_11442 | v2HS_229912 | TTAGTCCATTTCTTTGTTCT    | NM_080676    | MACROD2   | MACRO domain containing 2 (MACROD2), transcript variant 1, mRNA                                                     | -0.82         | 0.12        | 0.07         | 0.90       | -0.89           | 0.23    |
| Hs_12plexchip_4_11539 | v2HS_234422 | ATATTTGAGATAACTACAACCA  | NM_002358    | MAD2L1    | MAD2 mitotic arrest deficient-like 1 (yeast) (MAD2L1), mRNA                                                         | -3.18         | 0.42        | -1.48        | 0.45       | -1.69           | 0.01    |
| Hs_12plexchip_2_4749  | v2HS_177234 | TTTCAATTCGATTATGGCCCA   | NM_032717    | MAG1      | lung cancer metastasis-associated protein (MAG1), mRNA                                                              | -0.75         | 0.21        | 0.11         | 0.24       | -0.86           | 0.01    |
| Hs_12plexchip_4_11140 | v2HS_201106 | AAGAAATAGGAGTGGTTGTCGG  | NM_138702    | MAGEC3    | melanoma antigen family C, 3 (MAGEC3), transcript variant 1, mRNA                                                   | -1.94         | 0.40        | -1.02        | 0.88       | -0.93           | 0.20    |
| Hs_12plexchip_6_6416  | v2HS_227605 | ATCACCAAGAGGAGACTCAGCC  | NM_001098800 | MAGED4    | melanoma antigen family D, 4 (MAGED4), mRNA                                                                         | -1.53         | 0.30        | -0.79        | 0.41       | -0.73           | 0.07    |
| Hs0P00002357          | v2HS_59106  | TTATTCTTTCAGTTCCTCCAT   | NM_002370    | MAGOH     | mago-nashi homolog, proliferation-associated ( <i>Drosophila</i> ) (MAGOH), mRNA                                    | -2.52         | 0.45        | -1.45        | 0.18       | -1.07           | 0.04    |
| Hs_12plexchip_5_6928  | v2HS_170531 | ATTAGCTTCTGGCCATGACCA   | NM_002755    | MAP2K1    | mitogen-activated protein kinase kinase 1 (MAP2K1), mRNA                                                            | -0.96         | 0.51        | 0.42         | 0.50       | -1.38           | 0.03    |
| Hs_12plexchip_3_7278  | v2HS_98043  | TTCTAGGCTGACAATTAGTCCCT | NM_021970    | MAP2K1IP1 | mitogen-activated protein kinase kinase 1 interacting protein 1 (MAP2K1IP1), mRNA                                   | -1.03         | 0.42        | -0.08        | 0.12       | -0.95           | 0.05    |
| Hs_12plexchip_4_4739  | v2HS_201713 | ATCCCTGAAGAGTAACTGCGGC  | NM_002757    | MAP2K5    | mitogen-activated protein kinase kinase 5 (MAP2K5), transcript variant B, mRNA                                      | -1.11         | 0.82        | -0.32        | 0.27       | -0.79           | 0.23    |

| Probe ID              | v2HS        | Sequence                | Accession    | Symbol   | Gene Name                                                                                         | Mut log2 mean | Mut log2 SD | WT log2 Mean | WT log2 SD | log2 difference | P-value |
|-----------------------|-------------|-------------------------|--------------|----------|---------------------------------------------------------------------------------------------------|---------------|-------------|--------------|------------|-----------------|---------|
| Hs_12plexchip_5_3581  | v2HS_100863 | TTTCATGGAGATACGAAAGGCC  | NM_005921    | MAP3K1   | mitogen-activated protein kinase kinase kinase 1 (MAP3K1), mRNA                                   | -1.23         | 1.32        | 0.08         | 0.15       | -1.31           | 0.23    |
| Hs_12plexchip_2_92    | v2HS_151563 | TATCTCCTCCCTCAATGTCTGGA | NM_030885    | MAP4     | microtubule-associated protein 4 (MAP4), transcript variant 3, mRNA                               | -1.28         | 0.57        | -0.15        | 0.97       | -1.12           | 0.18    |
| Hs0P00000072          | v2HS_71361  | TGAAGTACTGATGTTCCAGCGGG | NM_139033    | MAPK7    | MITOGEN-ACTIVATED PROTEIN KINASE 7                                                                | -0.78         | 0.23        | 0.63         | 0.71       | -1.40           | 0.06    |
| Hs_12plexchip_3_11702 | v2HS_217930 | TTCTTCTAGGGATTCTGTGGT   | NM_139049    | MAPK8    | mitogen-activated protein kinase 8 (MAPK8), transcript variant JNK1-a2, mRNA                      | -1.23         | 0.10        | -0.25        | 0.45       | -0.98           | 0.06    |
| Hs0P00011475          | v2HS_27291  | TTTACTAATCAGAAAGGTCGGT  | NM_003668    | MAPKAP5  | mitogen-activated protein kinase-activated protein kinase 5 (MAPKAP5), transcript variant 1, mRNA | -1.48         | 0.46        | -0.50        | 0.64       | -0.98           | 0.11    |
| Hs_12plexchip_3_11703 | v2HS_173986 | ATAATGGTTCATATGACTGCCA  | NM_017824    | MARCH5   | membrane-associated ring finger (C3HC4) 5 (MARCH5), mRNA                                          | -1.39         | 0.85        | -0.13        | 0.75       | -1.26           | 0.13    |
| Hs_12plexchip_6_2004  | v2HS_99593  | AATTCAAACATTCTGCTGGCT   | NM_052858    | MARVELD3 | MARVEL domain containing 3 (MARVELD3), transcript variant 2, mRNA                                 | -0.84         | 0.38        | 0.46         | 0.84       | -1.29           | 0.10    |
| Hs_12plexchip_5_6111  | v2HS_177829 | TTTGTGCTACAGACTAAATCCA  | NM_032844    | MASTL    | microtubule associated serine/threonine kinase-like (MASTL), mRNA                                 | -2.97         | 0.75        | -0.17        | 2.18       | -2.80           | 0.15    |
| Hs_12plexchip_4_12292 | v2HS_151587 | TATAACCTTCAAAGCACTGGCA  | NM_030583    | MATN2    | matrilin 2 (MATN2), transcript variant 2, mRNA                                                    | -1.50         | 0.68        | -0.40        | 0.27       | -1.10           | 0.09    |
| Hs_12plexchip_5_1859  | v2HS_253434 | TTTAACCTCGTGTGGCAGGCT   | NR_002724    | MBL1P1   | mannose-binding lectin (protein A) 1, pseudogene 1 (MBL1P1) on chromosome 10                      | -0.97         | 0.37        | -0.09        | 0.60       | -0.87           | 0.11    |
| Hs_12plexchip_2_3066  | v2HS_84920  | CAGAGTGATGACATGCTGGCC   | NM_006739    | MCM5     | minichromosome maintenance complex component 5 (MCM5), mRNA                                       | -1.03         | 0.91        | -0.06        | 0.68       | -0.97           | 0.22    |
| Hs_12plexchip_5_12577 | v2HS_252067 | ATTGATTTATTCAGTAACCGGA  | NM_005915    | MCM6     | minichromosome maintenance complex component 6 (MCM6), mRNA                                       | -1.87         | 0.72        | -0.94        | 0.22       | -0.92           | 0.15    |
| Hs_12plexchip_3_2395  | v2HS_69010  | ATGAACTACCAGATGCAGGTTG  | NM_024596    | MCPH1    | microcephalin 1 (MCPH1), mRNA                                                                     | -1.43         | 0.56        | -0.42        | 0.16       | -1.01           | 0.08    |
| Hs_12plexchip_4_1313  | v2HS_211486 | GCAATTTGAGCTTTAGCTCGGT  | NM_005917    | MDH1     | malate dehydrogenase 1, NAD (soluble) (MDH1), mRNA                                                | -1.38         | 0.62        | 0.28         | 1.45       | -1.66           | 0.17    |
| Hs_12plexchip_6_9531  | v2HS_251349 | TTAACCGGATTGGCAATGACGC  | NM_005918    | MDH2     | malate dehydrogenase 2, NAD (mitochondrial) (MDH2), mRNA                                          | -1.08         | 0.98        | 0.04         | 1.16       | -1.12           | 0.27    |
| Hs_12plexchip_6_2145  | v2HS_100737 | ATAAGGTGCTAGGTGATGGCGG  | NM_015335    | MED13L   | mediator complex subunit 13-like (MED13L), mRNA                                                   | -1.90         | 0.88        | -0.48        | 1.59       | -1.42           | 0.27    |
| Hs_12plexchip_3_2125  | v2HS_68244  | TTTAAATGGGTGCTACACTGGT  | NM_004830    | MED23    | mediator complex subunit 23 (MED23), transcript variant 1, mRNA                                   | -0.98         | 0.39        | -0.13        | 0.50       | -0.86           | 0.08    |
| Hs_12plexchip_2_3191  | v2HS_74476  | AATTCAGTGGCGTTAAAGTCCT  | NM_022566    | MESDC1   | mesoderm development candidate 1 (MESDC1), mRNA                                                   | -1.26         | 0.44        | -0.42        | 0.36       | -0.84           | 0.06    |
| Hs_12plexchip_6_903   | v2HS_197525 | ATTCCAAATCTCTCACTTGCC   | NM_006838    | METAP2   | methionyl aminopeptidase 2 (METAP2), mRNA                                                         | -2.36         | 0.32        | -0.37        | 0.75       | -1.98           | 0.03    |
| Hs_12plexchip_4_6122  | v2HS_20520  | AACACATTTATGGCCACAGTG   | BC019880     | MGC21881 | HYPOTHETICAL PROTEIN LOC286286                                                                    | -0.71         | 0.41        | 0.26         | 0.71       | -0.97           | 0.13    |
| Hs_12plexchip_3_4352  | v2HS_36090  | ATATCATAGAGTTGTATCGCT   | NM_144973    | MGC24039 | hypothetical protein MGC24039 (MGC24039), mRNA                                                    | -0.99         | 0.59        | -0.20        | 0.56       | -0.79           | 0.17    |
| Hs_12plexchip_6_4740  | v2HS_179347 | ATTTAGTGAATAGCCATTCT    | NM_173802    | MGC50559 | hypothetical protein MGC50559 (MGC50559), mRNA                                                    | -1.24         | 0.24        | -0.46        | 0.80       | -0.77           | 0.23    |
| Hs_12plexchip_6_8840  | v2HS_212220 | TAGTAATCTCCCTGAACGCTGC  | NM_006533    | MIA      | melanoma inhibitory activity (MIA), mRNA                                                          | -1.18         | 0.51        | -0.40        | 0.87       | -0.79           | 0.26    |
| Hs_12plexchip_4_11095 | v2HS_98414  | AATGTTCTCCAGATCAATGCCT  | NM_022765    | MICAL1   | microtubule associated monoxxygenase, calponin and LIM domain containing 1 (MICAL1), mRNA         | -1.51         | 0.93        | -0.75        | 0.04       | -0.76           | 0.29    |
| Hs_12plexchip_5_3248  | v2HS_49368  | TTCCTGTCAATTGATTATATGCT | NM_001098624 | MID1     | midline 1 (Opitz/BBB syndrome) (MID1), transcript variant 4, mRNA                                 | -2.07         | 0.41        | -0.74        | 0.51       | -1.33           | 0.03    |
| Hs_12plexchip_2_7674  | v2HS_151786 | TTTCCCTTAGGAGTTCTCAGCT  | NM_002417    | MKI67    | antigen identified by monoclonal antibody Ki-67 (MKI67), mRNA                                     | -0.73         | 0.29        | 0.20         | 0.58       | -0.94           | 0.09    |
| Hs_12plexchip_6_726   | v2HS_151785 | TTTCCCTTAGGAGTTTGTAGCCG | NM_002417    | MKI67    | antigen identified by monoclonal antibody Ki-67 (MKI67), mRNA                                     | -0.98         | 0.13        | 0.64         | 0.59       | -1.62           | 0.04    |
| Hs_12plexchip_4_10628 | v2HS_100809 | AATGAAATTCATGGTCTCTGCA  | NM_182493    | MLCK     | MLCK protein (MLCK), mRNA                                                                         | -1.62         | 0.20        | -0.68        | 0.54       | -0.94           | 0.08    |
| Hs_12plexchip_5_1542  | v2HS_249839 | ATAGCAAAGGGATCCATCAGGA  | NM_005439    | MLF2     | myeloid leukemia factor 2 (MLF2), mRNA                                                            | -1.44         | 0.51        | -0.02        | 0.30       | -1.42           | 0.02    |
| Hs0P00005246          | v2HS_120224 | TTGTAACAGAGAAGCGTGCCCA  | AL833362     | MLKL     | MIXED LINEAGE KINASE DOMAIN-LIKE                                                                  | -1.10         | 1.54        | 1.14         | 0.81       | -2.24           | 0.11    |
| Hs_12plexchip_2_12570 | v2HS_198375 | TATTGGTTTGCGAATAAGACCT  | NM_005933    | MLL      | myeloid/lymphoid or mixed-lineage leukemia (trithorax homolog, Drosophila) (MLL), mRNA            | -1.30         | 0.53        | -0.24        | 0.44       | -1.06           | 0.06    |
| Hs_12plexchip_6_736   | v2HS_196843 | TTTCTTCTGATCTTATCTCCA   | NM_005933    | MLL      | myeloid/lymphoid or mixed-lineage leukemia (trithorax homolog, Drosophila) (MLL), mRNA            | -0.74         | 0.67        | 0.61         | 0.54       | -1.35           | 0.06    |
| Hs_12plexchip_6_1814  | v2HS_117180 | ATACTGTAGAACATGACATCCT  | NM_031415    | MLZE     | melanoma-derived leucine zipper, extra-nuclear factor (MLZE), mRNA                                | -1.52         | 1.05        | 1.12         | 1.25       | -2.64           | 0.05    |

| Probe ID              | v2HS        | Sequence                | Accession    | Symbol    | Gene Name                                                                                                             | Mut log2 mean | Mut log2 SD | WT log2 Mean | WT log2 SD | log2 difference | P-value |
|-----------------------|-------------|-------------------------|--------------|-----------|-----------------------------------------------------------------------------------------------------------------------|---------------|-------------|--------------|------------|-----------------|---------|
| Hs_12plexchip_6_4136  | v2HS_178440 | TAGATCATGCACCTCTGACTGCT | NM_033467    | MMEL1     | membrane metallo-endopeptidase-like 1 (MMEL1), mRNA                                                                   | -1.39         | 0.39        | -0.31        | 0.93       | -1.09           | 0.17    |
| Hs_12plexchip_4_8554  | v2HS_151858 | TAAATTAACCCCTTCCGGTCCA  | NM_002430    | MN1       | meningioma (disrupted in balanced translocation) 1 (MN1), mRNA                                                        | -1.31         | 0.86        | -0.07        | 1.03       | -1.24           | 0.19    |
| Hs_12plexchip_4_7836  | v2HS_151873 | TTAACATTTCATGGCTCTTCT   | NM_002432    | MNDA      | myeloid cell nuclear differentiation antigen (MNDA), mRNA                                                             | -1.04         | 0.47        | 0.04         | 0.63       | -1.08           | 0.08    |
| Hs_12plexchip_5_1540  | v2HS_54255  | TTTCGGAAGAACGGAAGAAGCA  | NM_130807    | MOBK2A    | MOB1, Mps One Binder kinase activator-like 2A (yeast) (MOBK2A), mRNA                                                  | -1.55         | 0.13        | -0.32        | 0.52       | -1.23           | 0.05    |
| Hs_12plexchip_5_11551 | v2HS_272336 | TTGTATTCCTGGTCTTATGGC   | NM_032332    | MORG1     | mitogen-activated protein kinase organizer 1 (MORG1), transcript variant 2, mRNA                                      | -1.52         | 0.40        | -0.18        | 0.49       | -1.33           | 0.02    |
| Hs_12plexchip_5_7127  | v2HS_36817  | AACITTAAGTCTCCAGTGCG    | NM_005372    | MOS       | v-mos Moloney murine sarcoma viral oncogene homolog (MOS), mRNA                                                       | -1.01         | 0.55        | -0.06        | 0.82       | -0.95           | 0.18    |
| Hs_12plexchip_5_12339 | v2HS_242606 | ATTTCATCACAAGCAGGTTTCCC | NM_003829    | MPDZ      | multiple PDZ domain protein (MPDZ), mRNA                                                                              | -0.99         | 1.05        | -0.11        | 0.06       | -0.88           | 0.28    |
| HsOP00010208          | v2HS_16945  | TTCTCCATCATGCTCAACGGC   | NM_003829    | MPDZ      | multiple PDZ domain protein (MPDZ), mRNA                                                                              | -2.39         | 0.93        | -0.95        | 0.49       | -1.44           | 0.10    |
| Hs_12plexchip_6_7023  | v2HS_59513  | TTTACGTACTACATCATCCAA   | NM_005791    | MPHOSPH10 | M-phase phosphoprotein 10 (U3 small nucleolar ribonucleoprotein) (MPHOSPH10), mRNA                                    | -2.12         | 0.98        | -1.02        | 0.73       | -1.10           | 0.20    |
| Hs_12plexchip_5_2567  | v2HS_204825 | ATTAATAACTATAGAGACACCA  | NM_005792    | MPHOSPH6  | M-phase phosphoprotein 6 (MPHOSPH6), mRNA                                                                             | -4.05         | 0.27        | -1.21        | 0.89       | -2.84           | 0.02    |
| Hs_12plexchip_6_10381 | v2HS_36836  | AATGTTCCGGGAGAACTTCA    | NM_005373    | MPL       | myeloproliferative leukemia virus oncogene (MPL), mRNA                                                                | -1.53         | 0.82        | -0.29        | 0.76       | -1.24           | 0.13    |
| Hs_12plexchip_2_2373  | v2HS_76384  | TTGTAGGAACGGTACGTGGGCA  | NM_000250    | MPO       | myeloperoxidase (MPO), nuclear gene encoding mitochondrial protein, mRNA                                              | -1.52         | 0.82        | -0.70        | 0.62       | -0.82           | 0.24    |
| Hs_12plexchip_6_5149  | v2HS_66661  | TTTCTCGGGAACAGATCTGGG   | NM_021134    | MRPL23    | mitochondrial ribosomal protein L23 (MRPL23), nuclear gene encoding mitochondrial protein, mRNA                       | -0.83         | 0.25        | 0.31         | 0.70       | -1.14           | 0.09    |
| Hs_12plexchip_5_12676 | v2HS_253656 | TATTCTCCACACTTTCAGTCCA  | NM_007208    | MRPL3     | mitochondrial ribosomal protein L3 (MRPL3), nuclear gene encoding mitochondrial protein, mRNA                         | -3.03         | 1.07        | -1.22        | 1.30       | -1.81           | 0.14    |
| Hs_12plexchip_6_9149  | v2HS_237290 | GTGATTGCTCTCTTAGAGGCG   | NM_145213    | MRPL30    | mitochondrial ribosomal protein L30 (MRPL30), nuclear gene encoding mitochondrial protein, transcript variant 3, mRNA | -2.60         | 0.11        | -0.29        | 0.30       | -2.31           | 0.00    |
| Hs_12plexchip_6_9486  | v2HS_154405 | TTTATTAAGAGATCATTCCGC   | NM_080794    | MRPL39    | mitochondrial ribosomal protein L39 (MRPL39), nuclear gene encoding mitochondrial protein, transcript variant 2, mRNA | -1.70         | 0.64        | -0.53        | 1.10       | -1.18           | 0.20    |
| HsOP00002853          | v2HS_62393  | CTAGAATTGAATTGCTGAGCC   | BG327319     | MRPL49    | MITOCHONDRIAL RIBOSOMAL PROTEIN L49                                                                                   | -1.40         | 0.45        | 0.28         | 0.37       | -1.68           | 0.01    |
| Hs_12plexchip_3_2049  | v2HS_61946  | AATTGCAGAATCGTAGATGGT   | AY135343     | MRPS36P4  | MITOCHONDRIAL RIBOSOMAL PROTEIN S36 PSEUDOGENE 4                                                                      | -1.87         | 0.65        | -0.62        | 0.45       | -1.25           | 0.06    |
| Hs_12plexchip_2_7140  | v2HS_155898 | AATGGTAGAAATGGAAGTGGC   | NM_018133    | MSL2L1    | male-specific lethal 2-like 1 (Drosophila) (MSL2L1), mRNA                                                             | -0.91         | 0.81        | 0.15         | 0.43       | -1.06           | 0.14    |
| Hs_12plexchip_6_8569  | v2HS_59450  | ATGCTTTAGGACGTCACAGCTGC | NM_013404    | MSLN      | mesothelin (MSLN), transcript variant 2, mRNA                                                                         | -0.90         | 0.25        | 0.04         | 0.14       | -0.94           | 0.01    |
| Hs_12plexchip_4_9734  | v2HS_20397  | TTAAGAGAAGCAATGACTCGCT  | NM_012228    | MSRB2     | methionine sulfoxide reductase B2 (MSRB2), mRNA                                                                       | -0.75         | 0.83        | 0.14         | 0.37       | -0.89           | 0.19    |
| Hs_12plexchip_5_6885  | v2HS_36306  | TTTGCAACCAACTCTAATCTCG  | NM_004739    | MTA2      | metastasis associated 1 family, member 2 (MTA2), mRNA                                                                 | -1.29         | 0.38        | -0.42        | 0.10       | -0.87           | 0.05    |
| Hs_12plexchip_6_9835  | v2HS_191887 | TATTTCTCTGGTTTGAAAGGT   | AK022122     | MTBP      | MDM2, TRANSFORMED 3T3 CELL DOUBLE MINUTE 2, P53 BINDING PROTEIN (MOUSE) BINDING PROTEIN, 104KDA                       | -1.68         | 0.14        | -0.66        | 0.74       | -1.03           | 0.13    |
| Hs_12plexchip_5_5479  | v2HS_257732 | AATTTCCCTGATATGATCTGGT  | NM_000254    | MTR       | 5-methyltetrahydrofolate-homocysteine methyltransferase (MTR), mRNA                                                   | -0.84         | 0.70        | 0.34         | 0.25       | -1.18           | 0.09    |
| Hs_12plexchip_4_1019  | v2HS_196467 | TTAACAAATGGACTATTGGAC   | NM_001006635 | MTX2      | metaxin 2 (MTX2), transcript variant 2, mRNA                                                                          | -2.45         | 0.72        | -0.35        | 0.30       | -2.09           | 0.02    |
| Hs_12plexchip_6_12695 | v2HS_163117 | ATATGTTAATGGAGTACTTCT   | NM_001040105 | MUC17     | mucin 17, cell surface associated (MUC17), mRNA                                                                       | -0.81         | 0.47        | 0.15         | 0.40       | -0.96           | 0.06    |
| Hs_12plexchip_5_4771  | v2HS_257856 | ATAGAAATTCATCCAATTCCC   | NM_000255    | MUT       | methylmalonyl Coenzyme A mutase (MUT), nuclear gene encoding mitochondrial protein, mRNA                              | -0.76         | 0.35        | 0.25         | 0.28       | -1.01           | 0.02    |
| Hs_12plexchip_3_769   | v2HS_50240  | ATGAGGGTTGATTCAGGCCCA   | NM_005115    | MVP       | major vault protein (MVP), transcript variant 2, mRNA                                                                 | -1.22         | 0.17        | -0.22        | 0.58       | -1.00           | 0.09    |

| Probe ID              | v2HS        | Sequence                | Accession | Symbol  | Gene Name                                                                                        | Mut log2 mean | Mut log2 SD | WT log2 Mean | WT log2 SD | log2 difference | P-value |
|-----------------------|-------------|-------------------------|-----------|---------|--------------------------------------------------------------------------------------------------|---------------|-------------|--------------|------------|-----------------|---------|
| Hs_12plexchip_6_9369  | v2HS_152028 | TAATTCACAAGCCTGGCAGCT   | NM_002462 | MX1     | myxovirus (influenza virus) resistance 1, interferon-inducible protein p78 (mouse) (MX1), mRNA   | -1.85         | 0.25        | -1.14        | 0.68       | -0.71           | 0.21    |
| Hs_12plexchip_6_9438  | v2HS_263085 | TTGTTGTTAGCACCAGGAGCCG  | NM_002466 | MYBL2   | v-myb myeloblastosis viral oncogene homolog (avian)-like 2 (MYBL2), mRNA                         | -1.67         | 0.51        | -0.89        | 0.77       | -0.78           | 0.23    |
| Hs_12plexchip_5_4462  | v2HS_255399 | ATGTGGGACACCTTTATCGCGC  | NM_000256 | MYBPC3  | myosin binding protein C, cardiac (MYBPC3), mRNA                                                 | -1.75         | 1.03        | -0.29        | 0.29       | -1.46           | 0.12    |
| Hs_12plexchip_4_5398  | v2HS_16475  | AATGGTTGTCAAAGAGTTTGGT  | NM_014981 | MYH15   | myosin, heavy chain 15 (MYH15), mRNA                                                             | -0.82         | 0.52        | 0.19         | 0.74       | -1.01           | 0.13    |
| Hs_12plexchip_5_3585  | v2HS_71122  | TAAGCTATCCTATTAATTGGGC  | NM_013262 | MYLIP   | myosin regulatory light chain interacting protein (MYLIP), mRNA                                  | -2.03         | 1.07        | 0.98         | 1.43       | -3.01           | 0.05    |
| Hs_12plexchip_3_3191  | v2HS_70160  | TAATACCATCACGGTTCCTGGTC | NM_013292 | MYLPF   | fast skeletal myosin light chain 2 (MYLPF), mRNA                                                 | -0.98         | 0.18        | 0.04         | 0.54       | -1.02           | 0.07    |
| Hs_12plexchip_3_1572  | v2HS_61202  | TAAAGTACTCAATGGGTGTCCA  | NM_004998 | MYO1E   | myosin IE (MYO1E), mRNA                                                                          | -2.05         | 0.32        | -1.25        | 0.13       | -0.79           | 0.04    |
| Hs_12plexchip_5_520   | v2HS_50269  | TATTGGGAATGGGATCAGCACGG | NM_012330 | MYST4   | MYST histone acetyltransferase (monocytic leukemia) 4 (MYST4), mRNA                              | -0.96         | 0.42        | -0.17        | 0.34       | -0.79           | 0.07    |
| Hs_12plexchip_4_5674  | v2HS_16444  | TTAAATTGTCAAAGTACATCGT  | AF006822  | MYT2    | MYELIN TRANSCRIPTION FACTOR 2                                                                    | -0.89         | 0.26        | -0.18        | 0.35       | -0.72           | 0.05    |
| Hs_12plexchip_6_6546  | v2HS_139425 | GTGGAGTAAAGATGGCAAGGC   | X74613    | NA      | NA                                                                                               | -2.17         | 1.06        | -0.50        | 1.16       | -1.68           | 0.14    |
| Hs_12plexchip_2_2845  | v2HS_83390  | ATTTC AACCGACTGATTTGCGG | NM_023018 | NADK    | NAD kinase (NADK), mRNA                                                                          | -1.27         | 0.43        | -0.08        | 0.39       | -1.20           | 0.02    |
| Hs_12plexchip_4_6500  | v2HS_66759  | GTAGAATATCACGCAGGCAGGG  | NM_153006 | NAGS    | N-acetylglutamate synthase (NAGS), mRNA                                                          | -1.70         | 0.44        | -0.64        | 0.22       | -1.05           | 0.03    |
| Hs_12plexchip_2_11833 | v2HS_43386  | TTATCACAGATGATTTAGCCT   | NM_152667 | NANP    | N-acetylneuraminic acid phosphatase (NANP), mRNA                                                 | -1.13         | 0.19        | -0.38        | 0.46       | -0.75           | 0.09    |
| Hs_12plexchip_6_11820 | v2HS_121992 | TTATACATCATAGCTCTCAACCT | XR_017910 | NAP1L6  | PREDICTED:nucleosome assembly protein 1-like 6 (NAP1L6), misc RNA                                | -1.63         | 0.07        | -0.11        | 0.55       | -1.51           | 0.04    |
| Hs_12plexchip_5_11516 | v2HS_272934 | TTTATTATTGCTTTATAAGCC   | NM_057175 | NARG1   | NMDA receptor regulated 1 (NARG1), mRNA                                                          | -1.63         | 0.19        | 0.32         | 0.02       | -1.95           | 0.00    |
| Hs0P00007747          | v2HS_136909 | TTTCATTCAAATCTCTACCGC   | NM_057175 | NARG1   | NMDA receptor regulated 1 (NARG1), mRNA                                                          | -2.05         | 0.33        | -1.28        | 0.30       | -0.77           | 0.04    |
| Hs_12plexchip_2_11058 | v2HS_48258  | TTTAAATGGTAATCTTCTTGCT  | NM_004539 | NARS    | asparaginyl-tRNA synthetase (NARS), mRNA                                                         | -1.36         | 0.47        | -0.54        | 0.66       | -0.82           | 0.16    |
| Hs_12plexchip_2_4327  | v2HS_90025  | TTGTAATATACTGCTCTCTCT   | NM_000015 | NAT2    | N-acetyltransferase 2 (arylamine N-acetyltransferase) (NAT2), mRNA                               | -1.30         | 0.57        | -0.33        | 0.65       | -0.97           | 0.12    |
| Hs_12plexchip_6_8842  | v2HS_46816  | TAAGAGTATGAGGTTTCGAGGC  | NM_003960 | NAT8    | N-acetyltransferase 8 (NAT8), mRNA                                                               | -0.71         | 0.59        | 0.34         | 0.49       | -1.04           | 0.08    |
| Hs_12plexchip_5_9142  | v2HS_267506 | TTTAAATTAGAGGCTCCCTGGA  | NM_014903 | NAV3    | neuron navigator 3 (NAV3), mRNA                                                                  | -1.65         | 0.67        | -0.36        | 0.61       | -1.29           | 0.07    |
| Hs_12plexchip_6_9437  | v2HS_250396 | AATAGGTAGCGATTCTGACCTT  | NR_003108 | NBR2    | neighbor of BRCA1 gene 2 (NBR2) on chromosome 17                                                 | -1.20         | 0.50        | -0.01        | 0.40       | -1.19           | 0.04    |
| Hs0P00004781          | v2HS_111710 | ATTCCACACCACTGAGATCCGC  | NM_000615 | NCAM1   | neural cell adhesion molecule 1 (NCAM1), transcript variant 1, mRNA                              | -1.83         | 0.54        | -1.01        | 0.78       | -0.82           | 0.21    |
| Hs_12plexchip_6_1620  | v2HS_95758  | ATTGCTCCCAAAATTTCTGGC   | NM_014865 | NCAPD2  | non-SMC condensin I complex, subunit D2 (NCAPD2), mRNA                                           | -1.08         | 0.56        | 1.18         | 0.64       | -2.27           | 0.01    |
| Hs_12plexchip_2_3320  | v2HS_87782  | AATTAGAATCAATTTGTGACCT  | NM_022346 | NCAPG   | non-SMC condensin I complex, subunit G (NCAPG), mRNA                                             | -1.08         | 0.46        | -0.17        | 0.44       | -0.91           | 0.07    |
| Hs_12plexchip_3_2325  | v2HS_58556  | TTTGTCGATAAGATAGGATGGT  | NM_013436 | NCKAP1  | NCK-associated protein 1 (NCKAP1), transcript variant 1, mRNA                                    | -1.95         | 0.36        | -0.29        | 1.21       | -1.67           | 0.13    |
| Hs0P00005864          | v2HS_115886 | TTTGGTAATAGGCCACCAAGGC  | NM_184231 | NCKIPSD | NCK interacting protein with SH3 domain (NCKIPSD), transcript variant 2, mRNA                    | -0.82         | 0.16        | 0.09         | 0.32       | -0.91           | 0.02    |
| Hs_12plexchip_6_8471  | v2HS_36645  | TTTCCTAGTCATACCAATTCTG  | NM_005381 | NCL     | nucleolin (NCL), mRNA                                                                            | -2.38         | 0.99        | -0.74        | 0.66       | -1.64           | 0.08    |
| Hs0P00001416          | v2HS_59235  | TTATCAGGTGATGGTGGCACGG  | NM_014071 | NCOA6   | nuclear receptor coactivator 6 (NCOA6), mRNA                                                     | -0.73         | 0.20        | 0.15         | 0.74       | -0.88           | 0.17    |
| Hs_12plexchip_4_8307  | v2HS_152160 | TTTAAAGTTGACTCACGGTGGG  | NM_002487 | NDN     | needin homolog (mouse) (NDN), mRNA                                                               | -0.99         | 0.67        | 0.14         | 0.17       | -1.13           | 0.09    |
| Hs_12plexchip_3_668   | v2HS_35485  | AATAATGAGAATGTATTGCCT   | NM_004784 | NDST3   | N-deacetylase/N-sulfotransferase (heparan glucosaminyl) 3 (NDST3), mRNA                          | -0.77         | 0.42        | 0.38         | 0.11       | -1.15           | 0.03    |
| Hs_12plexchip_2_9274  | v2HS_22185  | TTGCTTTACTTGTAAAGTGTT   | NM_018838 | NDUFA12 | NADH dehydrogenase (ubiquinone) 1 alpha subcomplex, 12 (NDUFA12), mRNA                           | -0.85         | 0.80        | 0.08         | 0.29       | -0.93           | 0.17    |
| Hs_12plexchip_4_6295  | v2HS_20571  | CTAAATGTTGACGGTCTTGCC   | NM_005002 | NDUFA9  | NADH dehydrogenase (ubiquinone) 1 alpha subcomplex, 9, 39kDa (NDUFA9), mRNA                      | -1.56         | 0.82        | 0.09         | 0.73       | -1.65           | 0.06    |
| Hs_12plexchip_4_7809  | v2HS_152197 | TACATGGACTATAAATACTGCA  | NM_002495 | NDUFS4  | NADH dehydrogenase (ubiquinone) Fe-S protein 4, 18kDa (NADH-coenzyme Q reductase) (NDUFS4), mRNA | -1.60         | 0.10        | -0.79        | 0.28       | -0.80           | 0.03    |
| Hs_12plexchip_4_2918  | v2HS_169409 | AATTTCTCAATATCCTTAGCT   | NM_021074 | NDUFV2  | NADH dehydrogenase (ubiquinone) flavoprotein 2, 24kDa (NDUFV2), mRNA                             | -1.04         | 0.73        | -0.09        | 0.19       | -0.95           | 0.14    |
| Hs_12plexchip_6_1813  | v2HS_96761  | ATAGACTATCACTTGGAAAGCA  | NM_015509 | NECAP1  | NECAP endocytosis associated 1 (NECAP1), mRNA                                                    | -0.78         | 0.62        | 0.06         | 0.66       | -0.83           | 0.19    |

| Probe ID              | v2HS        | Sequence                | Accession | Symbol  | Gene Name                                                                                                               | Mut log2 mean | Mut log2 SD | WT log2 Mean | WT log2 SD | log2 difference | P-value |
|-----------------------|-------------|-------------------------|-----------|---------|-------------------------------------------------------------------------------------------------------------------------|---------------|-------------|--------------|------------|-----------------|---------|
| Hs_12plexchip_5_3280  | v2HS_80461  | AATGATCCTCATTACAGAGGCC  | NM_015277 | NEDD4L  | neural precursor cell expressed, developmentally down-regulated 4-like (NEDD4L), mRNA                                   | -2.12         | 0.43        | -0.92        | 0.89       | -1.20           | 0.13    |
| Hs0P00001564          | v2HS_64585  | ATATGATGCCTCATTATGAGCG  | NM_006156 | NEDD8   | neural precursor cell expressed, developmentally down-regulated 8 (NEDD8), mRNA                                         | -0.73         | 0.86        | 1.04         | 0.21       | -1.77           | 0.06    |
| Hs_12plexchip_4_6314  | v2HS_64532  | ATCAGATAGGAGCTGGTCTGTA  | NM_006158 | NEFL    | neurofilament, light polypeptide 68kDa (NEFL), mRNA                                                                     | -2.22         | 0.96        | -1.29        | 0.50       | -0.93           | 0.24    |
| Hs_12plexchip_3_12082 | v2HS_240615 | AATTTCTTTCCATGGACCTGGG  | NM_145043 | NEIL2   | nei like 2 (E. coli) (NEIL2), mRNA                                                                                      | -0.80         | 0.98        | 0.17         | 0.64       | -0.96           | 0.24    |
| Hs_12plexchip_5_6456  | v2HS_262163 | TTTATTCTTTCCAACCTTTCCT  | NM_012224 | NEK1    | NIMA (never in mitosis gene a)-related kinase 1 (NEK1), mRNA                                                            | -1.33         | 0.55        | -0.14        | 0.24       | -1.19           | 0.05    |
| Hs_12plexchip_6_843   | v2HS_202951 | TTTAGCTTCATTATCTTCTGCT  | NM_012224 | NEK1    | NIMA (never in mitosis gene a)-related kinase 1 (NEK1), mRNA                                                            | -0.88         | 1.00        | 1.27         | 1.07       | -2.15           | 0.06    |
| Hs_12plexchip_5_12256 | v2HS_207578 | TTAATAGGTAGGAGACCTCCAG  | NM_005863 | NET1    | neuroepithelial cell transforming gene 1 (NET1), transcript variant 2, mRNA                                             | -0.72         | 0.44        | 0.36         | 0.39       | -1.09           | 0.03    |
| Hs_12plexchip_5_10282 | v2HS_230876 | ATTGATAGTCAGTCATGGTGGT  | NM_000434 | NEU1    | sialidase 1 (lysosomal sialidase) (NEU1), mRNA                                                                          | -0.88         | 0.98        | -0.04        | 0.66       | -0.84           | 0.29    |
| Hs_12plexchip_4_8799  | v2HS_76032  | TTTCATCTTCAACTTCACTGCA  | NM_000267 | NF1     | neurofibromin 1 (neurofibromatosis, von Recklinghausen disease, Watson disease) (NF1), transcript variant 2, mRNA       | -0.84         | 0.22        | 0.37         | 0.50       | -1.21           | 0.04    |
| Hs_12plexchip_5_5040  | v2HS_76027  | ATTACGTTTGAAACTGCCAGCG  | NM_000267 | NF1     | neurofibromin 1 (neurofibromatosis, von Recklinghausen disease, Watson disease) (NF1), transcript variant 2, mRNA       | -0.89         | 0.34        | 1.48         | 0.32       | -2.37           | 0.00    |
| Hs_12plexchip_5_5442  | v2HS_260806 | TTAAGTAATGCGATATTGAGCA  | NM_000267 | NF1     | neurofibromin 1 (neurofibromatosis, von Recklinghausen disease, Watson disease) (NF1), transcript variant 2, mRNA       | -1.23         | 0.12        | 2.30         | 0.39       | -3.53           | 0.00    |
| Hs_12plexchip_5_7033  | v2HS_259783 | TTATAAACCCACATATGCTCCC  | NM_181833 | NF2     | neurofibromin 2 (bilateral acoustic neuroma) (NF2), transcript variant 9, mRNA                                          | -0.84         | 0.10        | 0.19         | 0.43       | -1.02           | 0.05    |
| Hs_12plexchip_6_2489  | v2HS_200375 | TAATGGTATTGTGCTGTGCTGCT | NM_181832 | NF2     | neurofibromin 2 (bilateral acoustic neuroma) (NF2), transcript variant 8, mRNA                                          | -1.12         | 1.72        | 0.73         | 0.88       | -1.85           | 0.20    |
| Hs0P00002730          | v2HS_50017  | CTATCTTCTCATAGCTGGTGGT  | NM_012340 | NFATC2  | nuclear factor of activated T-cells, cytoplasmic, calcineurin-dependent 2 (NFATC2), transcript variant 1, mRNA          | -2.04         | 0.30        | -0.80        | 1.07       | -1.24           | 0.17    |
| Hs_12plexchip_4_11015 | v2HS_136998 | TTATGTTACATAGTAGAATCCA  | AK022471  | NGLY1   | N-GLYCANASE 1                                                                                                           | -1.29         | 0.83        | -0.10        | 0.17       | -1.19           | 0.12    |
| Hs_12plexchip_3_10040 | v2HS_136186 | TAAATCTGATGGTCTTCAGCC   | NM_024528 | NKAP    | NFKB activating protein (NKAP), mRNA                                                                                    | -1.69         | 0.38        | -0.84        | 0.53       | -0.85           | 0.10    |
| Hs_12plexchip_3_2186  | v2HS_60796  | TTTGTTACAGATGTGATGTGCC  | NM_021209 | NLRC4   | NLR family, CARD domain containing 4 (NLRC4), mRNA                                                                      | -0.76         | 0.65        | 0.40         | 0.81       | -1.16           | 0.13    |
| Hs_12plexchip_5_459   | v2HS_41115  | TTTCTCATCCATTGAAATGCC   | NM_004688 | NMI     | N-myc (and STAT) interactor (NMI), mRNA                                                                                 | -0.75         | 0.08        | 0.48         | 0.41       | -1.23           | 0.03    |
| Hs_12plexchip_3_8465  | v2HS_98549  | TTAGCGATCCATTCATCCACCA  | NM_022787 | NMNAT1  | nicotinamide nucleotide adenyltransferase 1 (NMNAT1), mRNA                                                              | -1.38         | 0.24        | -0.32        | 0.46       | -1.06           | 0.04    |
| Hs_12plexchip_2_11578 | v2HS_49926  | ATTAACAGTGTATTAGTCCA    | NM_182977 | NNT     | nicotinamide nucleotide transhydrogenase (NNT), nuclear gene encoding mitochondrial protein, transcript variant 2, mRNA | -0.91         | 0.25        | -0.20        | 0.45       | -0.71           | 0.09    |
| Hs_12plexchip_6_7107  | v2HS_158377 | TAACITTTAAATCGATCATCGGT | NM_024894 | NOL10   | nucleolar protein 10 (NOL10), mRNA                                                                                      | -2.44         | 3.15        | 0.94         | 3.10       | -3.38           | 0.26    |
| Hs_12plexchip_6_5511  | v2HS_161165 | TAATAAGCTCAGGTATAAACCT  | NM_003703 | NOL14   | nucleolar protein 14 (NOL14), mRNA                                                                                      | -1.33         | 0.47        | -0.39        | 0.62       | -0.94           | 0.11    |
| Hs0P00010705          | v2HS_47052  | TTCACTCCAGCGGTAAGTGGG   | NM_003946 | NOL3    | nucleolar protein 3 (apoptosis repressor with CARD domain) (NOL3), mRNA                                                 | -1.44         | 0.40        | 0.18         | 0.54       | -1.62           | 0.02    |
| Hs_12plexchip_2_10055 | v2HS_23380  | TTGAATTAAGAATAGATAGCCT  | NM_003787 | NOL4    | nucleolar protein 4 (NOL4), mRNA                                                                                        | -0.78         | 0.13        | 0.57         | 0.30       | -1.35           | 0.01    |
| Hs_12plexchip_4_10140 | v2HS_197422 | TTAAACTTAACCTTGGCACGGG  | NM_006392 | NOL5A   | nucleolar protein 5A (56kDa with KKE/D repeat) (NOL5A), mRNA                                                            | -2.24         | 1.76        | 0.35         | 1.14       | -2.59           | 0.11    |
| Hs_12plexchip_5_3215  | v2HS_253869 | ATTAACCTTAACCTTGGCACGG  | NM_006392 | NOL5A   | nucleolar protein 5A (56kDa with KKE/D repeat) (NOL5A), mRNA                                                            | -2.61         | 0.66        | -0.98        | 0.15       | -1.63           | 0.04    |
| Hs_12plexchip_6_5083  | v2HS_116373 | AACTGCAAGACACTTCTCAGGA  | NM_139235 | NOL6    | nucleolar protein family 6 (RNA-associated) (NOL6), transcript variant gamma, mRNA                                      | -3.00         | 0.62        | -0.23        | 1.93       | -2.77           | 0.12    |
| Hs_12plexchip_3_11626 | v2HS_174662 | TTTCAGATTCATTTATTGAGGG  | NM_017948 | NOL8    | nucleolar protein 8 (NOL8), mRNA                                                                                        | -1.09         | 0.42        | 0.38         | 0.10       | -1.47           | 0.02    |
| Hs_12plexchip_4_6028  | v2HS_30849  | TTTCTCAGCGTATAGACTCGA   | NM_018648 | NOLA3   | nucleolar protein family A, member 3 (H/ACA small nucleolar RNPs) (NOLA3), mRNA                                         | -1.04         | 0.27        | 0.24         | 0.81       | -1.27           | 0.10    |
| Hs_12plexchip_3_12100 | v2HS_25502  | ATACTTAAGAGCTTTGCATCCT  | NG_000886 | NPM1P13 | NUCLEOPHOSMIN 1 (NUCLEOLAR PHOSPHOPROTEIN B23, NUMATRIN) PSEUDOGENE 13                                                  | -1.10         | 0.21        | -0.40        | 0.14       | -0.70           | 0.01    |

| Probe ID              | v2HS        | Sequence                | Accession    | Symbol  | Gene Name                                                                                | Mut log2 mean | Mut log2 SD | WT log2 Mean | WT log2 SD | log2 difference | P-value |
|-----------------------|-------------|-------------------------|--------------|---------|------------------------------------------------------------------------------------------|---------------|-------------|--------------|------------|-----------------|---------|
| Hs_12plexchip_4_5492  | v2HS_25500  | ATCTTCTATGGGTTTGTGGCAC  | NG_000886    | NPM1P13 | NUCLEOPHOSMIN 1 (NUCLEOLAR PHOSPHOPROTEIN B23, NUMATRIN) PSEUDOGENE 13                   | -1.76         | 0.41        | -0.69        | 0.37       | -1.07           | 0.03    |
| Hs_12plexchip_2_6256  | v2HS_169580 | AATGTGATCATCTTTGTGCGGCC | NG_001233    | NPM1P17 | NUCLEOPHOSMIN 1 (NUCLEOLAR PHOSPHOPROTEIN B23, NUMATRIN) PSEUDOGENE 17                   | -1.13         | 0.67        | 0.23         | 1.23       | -1.36           | 0.19    |
| Hs_12plexchip_4_2788  | v2HS_179585 | TAAAGTGATCACTTCGTGCGGCC | X54171       | NPM1P2  | NUCLEOPHOSMIN 1 (NUCLEOLAR PHOSPHOPROTEIN B23, NUMATRIN) PSEUDOGENE 2                    | -1.89         | 0.31        | -0.75        | 1.31       | -1.14           | 0.27    |
| Hs_12plexchip_2_9842  | v2HS_23482  | TTAGTCTGAGGTTGTAGCGT    | NM_001033047 | NPNT    | nephronectin (NPNT), mRNA                                                                | -0.98         | 0.28        | -0.26        | 0.46       | -0.72           | 0.09    |
| HsOP00001619          | v2HS_131236 | ATACACAATGCGCCCGTTGGCC  | NM_000907    | NPR2    | NATRIURETIC PEPTIDE RECEPTOR B/GUANYLATE CYCLASE B (ATRIONATRIURETIC PEPTIDE RECEPTOR B) | -2.36         | 0.42        | -1.03        | 0.98       | -1.33           | 0.13    |
| Hs_12plexchip_6_9954  | v2HS_131222 | ATGCAATTTCCAGGAGCAAAGCT | NM_000904    | NQO2    | NAD(P)H dehydrogenase, quinone 2 (NQO2), mRNA                                            | -1.40         | 0.95        | 0.34         | 0.58       | -1.74           | 0.07    |
| Hs_12plexchip_4_1897  | v2HS_12592  | TTATCCCAAGGGATGAGAGCCG  | NM_007121    | NR1H2   | nuclear receptor subfamily 1, group H, member 2 (NR1H2), mRNA                            | -1.31         | 0.82        | -0.34        | 0.84       | -0.97           | 0.22    |
| Hs_12plexchip_4_12610 | v2HS_239394 | TTTGTAGTTCAGACACTGCCA   | NM_022002    | NR1I2   | nuclear receptor subfamily 1, group I, member 2 (NR1I2), transcript variant 2, mRNA      | -2.26         | 1.28        | -1.21        | 0.51       | -1.05           | 0.29    |
| Hs_12plexchip_4_12431 | v2HS_239566 | ATTTAGCAAACCTCGTTATCCT  | NM_004959    | NR5A1   | nuclear receptor subfamily 5, group A, member 1 (NR5A1), mRNA                            | -1.00         | 0.85        | -0.25        | 0.53       | -0.76           | 0.27    |
| Hs_12plexchip_5_7176  | v2HS_61886  | ACTTAGTAGGCGAGTGTCGGG   | NM_004959    | NR5A1   | nuclear receptor subfamily 5, group A, member 1 (NR5A1), mRNA                            | -1.10         | 0.61        | 0.71         | 0.15       | -1.81           | 0.03    |
| Hs_12plexchip_4_8910  | v2HS_152364 | TTACTATTCCACAGTTCAGCCC  | NM_001101662 | NRD1    | nardilysin (N-arginine dibasic convertase) (NRD1), transcript variant 2, mRNA            | -0.72         | 0.52        | 0.90         | 0.33       | -1.62           | 0.02    |
| Hs_12plexchip_3_12053 | v2HS_31428  | GTAGTATACCTGTTGAGGCC    | NM_007243    | NRM     | nurim (nuclear envelope membrane protein) (NRM), mRNA                                    | -0.94         | 0.65        | 0.00         | 0.46       | -0.94           | 0.12    |
| Hs_12plexchip_5_12770 | v2HS_246996 | ATACATTCATACATATCTCCT   | NM_004801    | NRXN1   | neurexin 1 (NRXN1), transcript variant alpha, mRNA                                       | -0.75         | 1.24        | 1.49         | 0.29       | -2.24           | 0.08    |
| Hs_12plexchip_6_4951  | v2HS_157200 | TAAAGTGGTAAAGTGGAGGCC   | NM_024677    | NSUN7   | NOL1/NOP2/Sun domain family, member 7 (NSUN7), mRNA                                      | -1.93         | 0.78        | -0.40        | 1.27       | -1.53           | 0.16    |
| Hs_12plexchip_4_9973  | v2HS_23979  | TTAAAGGGTGACATCTTCTGGC  | NM_001005744 | NUMB    | numb homolog (Drosophila) (NUMB), transcript variant 2, mRNA                             | -0.73         | 0.27        | 0.02         | 0.87       | -0.76           | 0.27    |
| Hs_12plexchip_5_9201  | v2HS_268280 | AATATGATCGAGACTATAGCGA  | NM_015231    | NUP160  | nucleoporin 160kDa (NUP160), mRNA                                                        | -3.50         | 1.54        | -1.23        | 0.95       | -2.27           | 0.11    |
| Hs_12plexchip_5_11467 | v2HS_139799 | TATTCCAATGACTGCCAGAGGG  | NM_015135    | NUP205  | nucleoporin 205kDa (NUP205), mRNA                                                        | -2.67         | 1.05        | -0.52        | 0.26       | -2.15           | 0.06    |
| Hs_12plexchip_2_10682 | v2HS_18093  | ATTTTCATAGGAACTAGCAAGCC | NM_005085    | NUP214  | nucleoporin 214kDa (NUP214), mRNA                                                        | -1.49         | 1.05        | -0.12        | 0.24       | -1.37           | 0.15    |
| Hs_12plexchip_3_12543 | v2HS_18094  | ATAGGTTAGAGGTATTTGAGGT  | NM_005085    | NUP214  | nucleoporin 214kDa (NUP214), mRNA                                                        | -3.00         | 1.47        | -1.81        | 0.16       | -1.20           | 0.29    |
| HsOP00011283          | v2HS_18091  | ATTTGGTGTGAGATTCTATGGT  | NM_005085    | NUP214  | nucleoporin 214kDa (NUP214), mRNA                                                        | -2.08         | 0.60        | -1.27        | 0.26       | -0.81           | 0.13    |
| Hs_12plexchip_6_1324  | v2HS_157038 | ATTTACAGTAAGAATCTCAGGA  | NM_198887    | NUP43   | nucleoporin 43kDa (NUP43), transcript variant 1, mRNA                                    | -0.84         | 0.59        | 0.38         | 0.64       | -1.22           | 0.07    |
| Hs_12plexchip_5_4195  | v2HS_259822 | TATAGATATAAATTTGCCGCGC  | NM_014669    | NUP93   | NUCLEOPORIN 93KDA                                                                        | -3.13         | 1.47        | -1.23        | 0.21       | -1.90           | 0.15    |
| Hs_12plexchip_5_4320  | v2HS_79283  | TTCTTGAGTAAAGTCAAGGGCG  | NM_014669    | NUP93   | NUCLEOPORIN 93KDA                                                                        | -1.91         | 0.67        | -0.22        | 0.67       | -1.69           | 0.04    |
| Hs_12plexchip_6_776   | v2HS_152410 | AATAGTCTCTCAGCTTCTGCT   | NM_206840    | NVL     | nuclear VCP-like (NVL), transcript variant 2, mRNA                                       | -1.50         | 0.72        | 0.23         | 1.64       | -1.73           | 0.20    |
| Hs_12plexchip_5_12479 | v2HS_197439 | ATCATTTACAATACATAGCCCT  | NM_006362    | NXF1    | nuclear RNA export factor 1 (NXF1), transcript variant 1, mRNA                           | -3.73         | 1.47        | -1.06        | 1.22       | -2.68           | 0.07    |
| Hs_12plexchip_5_12758 | v2HS_197810 | TTTCTTTGAGGGAAATTAACGC  | NM_006362    | NXF1    | nuclear RNA export factor 1 (NXF1), transcript variant 1, mRNA                           | -1.64         | 0.36        | -0.33        | 0.46       | -1.30           | 0.02    |
| HsOP00004247          | v2HS_233222 | TTCCAGTATCTCAITGACGGCC  | NM_016118    | NYREN18 | NEDD8 ULTIMATE BUSTER-1                                                                  | -0.96         | 0.34        | -0.08        | 0.79       | -0.88           | 0.19    |
| Hs_12plexchip_5_9496  | v2HS_100250 | TTAGGGTCTAAACGTTCAAGGA  | NM_178507    | OAF     | OAF homolog (Drosophila) (OAF), mRNA                                                     | -1.68         | 1.10        | -0.22        | 0.20       | -1.46           | 0.14    |
| Hs_12plexchip_4_8550  | v2HS_152429 | ATTAAATGATCCATAGACGCCA  | NM_002539    | ODC1    | ornithine decarboxylase 1 (ODC1), mRNA                                                   | -2.58         | 1.46        | -0.42        | 1.42       | -2.16           | 0.14    |
| Hs_12plexchip_3_3067  | v2HS_62571  | TTGTAGAACCAGTCTTGTCCC   | NM_175881    | ODF3L1  | outer dense fiber of sperm tails 3-like 1 (ODF3L1), mRNA                                 | -1.44         | 1.02        | -0.23        | 0.65       | -1.21           | 0.17    |
| Hs_12plexchip_4_6899  | v2HS_62574  | ATGCTGTAAGTAGGGCTGCGGT  | NM_175881    | ODF3L1  | outer dense fiber of sperm tails 3-like 1 (ODF3L1), mRNA                                 | -2.24         | 1.09        | -1.09        | 0.79       | -1.15           | 0.22    |
| Hs_12plexchip_4_5845  | v2HS_22853  | TTCTATCGTCATCTTCTCTGCT  | NM_153003    | OFCC1   | orofacial cleft 1 candidate 1 (OFCC1), mRNA                                              | -0.85         | 0.16        | -0.09        | 0.14       | -0.75           | 0.00    |
| Hs_12plexchip_6_8498  | v2HS_91268  | ATTAGTATTCATAACAAGTCT   | NM_007280    | OIP5    | Opa interacting protein 5 (OIP5), mRNA                                                   | -1.46         | 0.59        | -0.10        | 0.74       | -1.36           | 0.07    |
| Hs_12plexchip_4_9119  | v2HS_197303 | TTGAGATTGGATATGACCATCA  | NM_005806    | OLIG2   | oligodendrocyte lineage transcription factor 2 (OLIG2), mRNA                             | -1.01         | 0.40        | -0.30        | 0.21       | -0.72           | 0.07    |

| Probe ID              | v2HS        | Sequence                | Accession    | Symbol   | Gene Name                                                                                    | Mut log2 mean | Mut log2 SD | WT log2 Mean | WT log2 SD | log2 difference | P-value |
|-----------------------|-------------|-------------------------|--------------|----------|----------------------------------------------------------------------------------------------|---------------|-------------|--------------|------------|-----------------|---------|
| Hs_12plexchip_5_1849  | v2HS_252101 | AAGAGGGAAACTTCATCTCGG   | NM_001005280 | OR10A7   | olfactory receptor, family 10, subfamily A, member 7 (OR10A7), mRNA                          | -1.76         | 0.50        | -0.95        | 0.58       | -0.81           | 0.14    |
| Hs_12plexchip_5_7540  | v2HS_265914 | ATTATCAGCTGAATGCAGACTT  | NM_001005491 | OR10AG1  | olfactory receptor, family 10, subfamily AG, member 1 (OR10AG1), mRNA                        | -0.97         | 0.65        | 0.09         | 0.31       | -1.06           | 0.09    |
| Hs_12plexchip_5_8245  | v2HS_263857 | CTATTAGGTGAGATGAGCAGGT  | NM_001005491 | OR10AG1  | olfactory receptor, family 10, subfamily AG, member 1 (OR10AG1), mRNA                        | -0.97         | 0.58        | 0.02         | 0.07       | -0.99           | 0.10    |
| Hs_12plexchip_3_4630  | v2HS_120544 | TAAGAACACCCGGTATTCTGGG  | NM_001004297 | OR13A1   | olfactory receptor, family 13, subfamily A, member 1 (OR13A1), mRNA                          | -1.28         | 0.11        | -0.40        | 0.91       | -0.88           | 0.24    |
| Hs_12plexchip_6_9462  | v2HS_245063 | ATAATCCAGCAACCAGCAGGGC  | NM_012360    | OR1F1    | olfactory receptor, family 1, subfamily F, member 1 (OR1F1), mRNA                            | -0.86         | 1.17        | 0.21         | 0.63       | -1.07           | 0.26    |
| Hs_12plexchip_5_717   | v2HS_246187 | AAGAGAGAAATAAATTGCCCT   | NM_001004492 | OR2B11   | olfactory receptor, family 2, subfamily B, member 11 (OR2B11), mRNA                          | -0.77         | 0.05        | 0.37         | 0.31       | -1.14           | 0.02    |
| Hs_12plexchip_5_12900 | v2HS_198794 | TTTGCAGAGTTAATCCTCAGCA  | NM_007160    | OR2H2    | olfactory receptor, family 2, subfamily H, member 2 (OR2H2), mRNA                            | -2.22         | 0.77        | -0.92        | 0.70       | -1.30           | 0.10    |
| Hs_12plexchip_6_6274  | v2HS_241031 | TTAGAAACCATGTCTGCCAGGA  | NM_001001964 | OR2T11   | olfactory receptor, family 2, subfamily T, member 11 (OR2T11), mRNA                          | -0.77         | 1.53        | 1.00         | 1.02       | -1.77           | 0.18    |
| Hs_12plexchip_6_12088 | v2HS_272380 | ATAAGTACAGGATACTGCAGGG  | NM_001004699 | OR2Z1    | olfactory receptor, family 2, subfamily Z, member 1 (OR2Z1), mRNA                            | -0.84         | 0.18        | 0.46         | 0.98       | -1.30           | 0.15    |
| Hs_12plexchip_3_6064  | v2HS_120864 | TAAAGAATGCACACAGATCCC   | NM_001004701 | OR4C16   | olfactory receptor, family 4, subfamily C, member 16 (OR4C16), mRNA                          | -0.75         | 0.55        | 0.67         | 0.90       | -1.42           | 0.09    |
| Hs_12plexchip_5_8955  | v2HS_264386 | ATTGGGTTCTTAAGTGCCTGGC  | NM_001004701 | OR4C16   | olfactory receptor, family 4, subfamily C, member 16 (OR4C16), mRNA                          | -2.16         | 0.47        | -1.04        | 0.32       | -1.12           | 0.03    |
| Hs_12plexchip_4_6976  | v2HS_68313  | TTTGAAGAGAAACCAGGATGA   | NM_001001912 | OR4E2    | olfactory receptor, family 4, subfamily E, member 2 (OR4E2), mRNA                            | -0.87         | 0.15        | 0.40         | 0.66       | -1.27           | 0.07    |
| Hs_12plexchip_5_11676 | v2HS_273833 | TTCGTTAGGGTCATAATTTCCA  | NM_001004063 | OR4K1    | olfactory receptor, family 4, subfamily K, member 1 (OR4K1), mRNA                            | -1.37         | 0.23        | -0.30        | 0.16       | -1.07           | 0.00    |
| Hs_12plexchip_5_1583  | v2HS_67552  | ATACATGGGCATGAAGGTTA    | NM_001004052 | OR52B2   | olfactory receptor, family 52, subfamily B, member 2 (OR52B2), mRNA                          | -0.79         | 0.54        | -0.01        | 0.25       | -0.78           | 0.11    |
| Hs_12plexchip_6_11958 | v2HS_226927 | ATTGGCGATAGATTGGGAGCC   | NM_001001966 | OR5AT1   | olfactory receptor, family 5, subfamily AT, member 1 (OR5AT1), mRNA                          | -1.42         | 0.79        | -0.04        | 1.20       | -1.38           | 0.18    |
| Hs_12plexchip_5_9051  | v2HS_120781 | TATTAGGCTGACAGAGAATCCA  | NM_001004743 | OR5M9    | olfactory receptor, family 5, subfamily M, member 9 (OR5M9), mRNA                            | -0.70         | 0.28        | 0.42         | 1.08       | -1.12           | 0.21    |
| Hs_12plexchip_5_10581 | v2HS_154440 | AATAAGGAGACAACTGAGAGGT  | NM_001005190 | OR7A10   | olfactory receptor, family 7, subfamily A, member 10 (OR7A10), mRNA                          | -1.01         | 0.14        | -0.30        | 0.53       | -0.71           | 0.14    |
| Hs_12plexchip_4_1458  | v2HS_204974 | GAAATGTGGCATAGATGGGCCA  | NM_001001658 | OR9A2    | olfactory receptor, family 9, subfamily A, member 2 (OR9A2), mRNA                            | -0.88         | 0.69        | 1.10         | 1.00       | -1.98           | 0.05    |
| Hs_12plexchip_4_9157  | v2HS_152494 | AACAGTCACATTCTGTGAGCC   | NM_181747    | ORC5L    | origin recognition complex, subunit 5-like (yeast) (ORC5L), transcript variant 2, mRNA       | -3.64         | 0.46        | -0.77        | 2.84       | -2.87           | 0.22    |
| Hs_12plexchip_5_10876 | v2HS_274419 | TTAGACTATTTCCCGAGCTGCT  | NM_024586    | OSBPL9   | oxysterol binding protein-like 9 (OSBPL9), transcript variant 6, mRNA                        | -1.01         | 0.10        | 0.06         | 0.51       | -1.07           | 0.06    |
| HsOP00002400          | v2HS_68955  | TTAAGCTCATCAATCTGGGTT   | NM_194248    | OTOF     | otoferlin (OTOF), transcript variant 1, mRNA                                                 | -0.72         | 0.41        | 0.31         | 0.28       | -1.03           | 0.03    |
| HsOP00010880          | v2HS_20220  | GTAATACTCAATATGGTCTCCT  | NM_005015    | OXA1L    | oxidase (cytochrome c) assembly 1-like (OXA1L), mRNA                                         | -2.15         | 0.83        | -0.78        | 0.86       | -1.37           | 0.12    |
| HsOP00006557          | v2HS_92987  | TTTGATTCTAATCCATAACCT   | NM_000430    | PAFAH1B1 | platelet-activating factor acetylhydrolase, isoform 1b, alpha subunit 45kDa (PAFAH1B1), mRNA | -2.29         | 0.63        | -1.13        | 0.16       | -1.16           | 0.08    |
| Hs_12plexchip_3_11738 | v2HS_218448 | TAAGTAAAGGAGATGAATGTGCG | NM_017734    | PALMD    | palmdelphin (PALMD), mRNA                                                                    | -0.98         | 0.43        | 0.27         | 0.33       | -1.25           | 0.02    |
| Hs_12plexchip_5_8998  | v2HS_98327  | TTAGTTGTGCCATAGACCAGGT  | NM_022750    | PARP12   | poly (ADP-ribose) polymerase family, member 12 (PARP12), mRNA                                | -1.10         | 0.43        | -0.07        | 0.38       | -1.03           | 0.04    |
| Hs_12plexchip_4_10171 | v2HS_12702  | TTGTATAAGTAGGTGGAGACCC  | NM_032052    | PATZ1    | POZ (BTB) and AT hook containing zinc finger 1 (PATZ1), transcript variant 3, mRNA           | -0.76         | 0.71        | 0.15         | 0.47       | -0.90           | 0.15    |
| Hs_12plexchip_5_12791 | v2HS_13712  | ATACTGCAAGAAGTGTGGGCC   | NM_032052    | PATZ1    | POZ (BTB) and AT hook containing zinc finger 1 (PATZ1), transcript variant 3, mRNA           | -1.77         | 0.91        | -0.46        | 1.16       | -1.31           | 0.20    |
| Hs_12plexchip_4_7731  | v2HS_22921  | CAATGGCTAATCAATGTCGGCC  | NG_000916    | PCBP2P1  | POLY(RC) BINDING PROTEIN 2, PSEUDOGENE 1                                                     | -1.48         | 0.54        | -0.67        | 0.58       | -0.81           | 0.15    |
| Hs_12plexchip_2_4271  | v2HS_78386  | TTTACAAATGCAGTTTATCCCT  | NM_007144    | PCGF2    | polycomb group ring finger 2 (PCGF2), mRNA                                                   | -0.73         | 0.69        | 0.23         | 0.79       | -0.96           | 0.19    |
| Hs_12plexchip_5_11295 | v2HS_138812 | ATCTAACTTCAGTTCAGAGGT   | NM_032373    | PCGF5    | polycomb group ring finger 5 (PCGF5), mRNA                                                   | -0.91         | 1.14        | 0.20         | 0.38       | -1.10           | 0.23    |
| Hs_12plexchip_2_5176  | v2HS_175340 | TATTGGACTATCACGGTCTGGC  | NM_018386    | PCID2    | PCI domain containing 2 (PCID2), mRNA                                                        | -2.38         | 0.91        | -1.25        | 0.42       | -1.13           | 0.15    |
| Hs_12plexchip_2_7761  | v2HS_152725 | ATTACAGAGGTGATGAATGGG   | NM_002594    | PCSK2    | proprotein convertase subtilisin/kexin type 2 (PCSK2), mRNA                                  | -0.99         | 0.38        | 0.23         | 0.68       | -1.23           | 0.07    |



| Probe ID              | v2HS        | Sequence                | Accession    | Symbol  | Gene Name                                                                                     | Mut log2 mean | Mut log2 SD | WT log2 Mean | WT log2 SD | log2 difference | P-value |
|-----------------------|-------------|-------------------------|--------------|---------|-----------------------------------------------------------------------------------------------|---------------|-------------|--------------|------------|-----------------|---------|
| Hs_12plexchip_3_7037  | v2HS_92131  | AATGCAGTTCAGGACTGACCC   | NM_014976    | PDCD11  | programmed cell death 11 (PDCD11), mRNA                                                       | -1.80         | 1.04        | -0.31        | 0.71       | -1.48           | 0.12    |
| Hs_12plexchip_3_3652  | v2HS_37058  | ATAAGGTAATTCTCTACTGCTT  | NM_004708    | PDCD5   | programmed cell death 5 (PDCD5), mRNA                                                         | -0.77         | 0.35        | 0.18         | 0.43       | -0.95           | 0.04    |
| Hs_12plexchip_4_7810  | v2HS_131308 | TTTAGCCTTTACATGTTAGCT   | NM_000921    | PDE3A   | phosphodiesterase 3A, cGMP-inhibited (PDE3A), mRNA                                            | -1.16         | 1.45        | 0.83         | 0.46       | -1.99           | 0.13    |
| Hs_12plexchip_6_3677  | v2HS_183211 | ATGCAATAACCGAAGAAATGCT  | AB042555     | PDE4DIP | PHOSPHODIESTERASE 4D INTERACTING PROTEIN (MYOMEGALIN)                                         | -1.13         | 1.17        | 0.38         | 0.82       | -1.51           | 0.15    |
| Hs_12plexchip_5_11185 | v2HS_271860 | ATAAATTCACAAATGGGCCGCA  | NM_000925    | PDHB    | pyruvate dehydrogenase (lipoamide) beta (PDHB), mRNA                                          | -1.58         | 0.10        | -0.79        | 0.72       | -0.79           | 0.20    |
| Hs_12plexchip_3_3413  | v2HS_38683  | TTTGATTAGACAATCCTCCCTG  | NM_020381    | PDSS2   | prenyl (decaprenyl) diphosphate synthase, subunit 2 (PDSS2), mRNA                             | -0.74         | 0.38        | 0.01         | 0.50       | -0.75           | 0.11    |
| Hs_12plexchip_4_8763  | v2HS_77249  | GTTGAATAGGAACCTCTCTCC   | NM_000209    | PDX1    | pancreatic and duodenal homeobox 1 (PDX1), mRNA                                               | -1.00         | 0.53        | -0.10        | 0.61       | -0.90           | 0.13    |
| Hs_12plexchip_6_2901  | v2HS_179289 | TTTATTGACTGACTTGCTAGCT  | NM_173791    | PDZD8   | PDZ domain containing 8 (PDZD8), mRNA                                                         | -0.77         | 0.87        | 0.09         | 0.49       | -0.86           | 0.23    |
| Hs_12plexchip_4_12002 | v2HS_169829 | TTTGACCTTTCTGTTCTGAGCC  | NM_002614    | PDZK1   | PDZ domain containing 1 (PDZK1), mRNA                                                         | -1.40         | 0.81        | 0.03         | 1.36       | -1.42           | 0.21    |
| Hs_12plexchip_4_31    | v2HS_169828 | ATATTATCACTCAAACCTTGCT  | NM_002614    | PDZK1   | PDZ domain containing 1 (PDZK1), mRNA                                                         | -0.81         | 0.20        | 0.08         | 0.18       | -0.89           | 0.01    |
| Hs_12plexchip_4_3593  | v2HS_169874 | TTCTGTTCACTGAGATTGAGCT  | NM_002622    | PFDN1   | prefoldin subunit 1 (PFDN1), mRNA                                                             | -1.46         | 0.15        | -0.25        | 0.79       | -1.20           | 0.11    |
| Hs_12plexchip_5_9908  | v2HS_100037 | TATGAGGATCTGATCGAGTCCA  | NM_170725    | PGBD2   | piggyBac transposable element derived 2 (PGBD2), transcript variant 1, mRNA                   | -2.10         | 0.70        | -1.29        | 0.59       | -0.81           | 0.20    |
| Hs_12plexchip_4_7213  | v2HS_65544  | ATAACCTCTCCATGATGGCCC   | NM_016134    | PGCP    | plasma glutamate carboxypeptidase (PGCP), mRNA                                                | -2.03         | 1.52        | -0.05        | 1.16       | -1.98           | 0.15    |
| HsOP00005147          | v2HS_117230 | ATTAGCTTCCAGACGTGGGCA   | NM_017712    | PGPEP1  | pyroglutamyl-peptidase I (PGPEP1), mRNA                                                       | -0.85         | 0.20        | 0.10         | 0.22       | -0.95           | 0.01    |
| Hs_12plexchip_6_4360  | v2HS_176972 | TATAGTAGGAGACTGACTTGGT  | NM_024947    | PHC3    | polyhomeotic homolog 3 (Drosophila) (PHC3), mRNA                                              | -0.82         | 0.29        | 0.13         | 0.61       | -0.95           | 0.10    |
| Hs_12plexchip_5_5650  | v2HS_261411 | ATATAGTCCGCATTCCAGGCC   | NM_015288    | PHF15   | PHD finger protein 15 (PHF15), mRNA                                                           | -0.90         | 0.37        | -0.11        | 0.96       | -0.79           | 0.29    |
| Hs_12plexchip_4_9518  | v2HS_73006  | ATAGAGCACTGAATACAAGCCC  | NM_014735    | PHF16   | PHD finger protein 16 (PHF16), transcript variant 1, mRNA                                     | -2.47         | 0.86        | -0.96        | 1.49       | -1.51           | 0.22    |
| HsOP00003901          | v2HS_115816 | ATAACAGGTGATTTCTCGGGC   | NM_016436    | PHF20   | PHD FINGER PROTEIN 20                                                                         | -0.89         | 0.71        | 0.51         | 0.17       | -1.40           | 0.07    |
| HsOP00005894          | v2HS_262439 | TAACAGGTGATTTCTCGGGCA   | NM_016436    | PHF20   | PHD FINGER PROTEIN 20                                                                         | -0.98         | 0.48        | 0.19         | 0.25       | -1.17           | 0.03    |
| Hs_12plexchip_3_2997  | v2HS_70208  | GTCTGGAATCAGAGCTTTGGC   | NM_138415    | PHF21B  | PHD finger protein 21B (PHF21B), mRNA                                                         | -0.92         | 0.87        | 0.52         | 0.78       | -1.44           | 0.10    |
| Hs_12plexchip_6_3812  | v2HS_276861 | AATAATATGAGACTAGTGGCT   | NM_032758    | PHF5A   | PHD finger protein 5A (PHF5A), mRNA                                                           | -3.13         | 0.62        | -1.11        | 2.12       | -2.02           | 0.24    |
| Hs_12plexchip_5_3785  | v2HS_75540  | TTCTTCTACTATTGTGAGGA    | NM_016483    | PHF7    | PHD finger protein 7 (PHF7), transcript variant 1, mRNA                                       | -1.02         | 0.75        | 1.05         | 1.23       | -2.07           | 0.08    |
| Hs_12plexchip_4_2383  | v2HS_169417 | TTTATGTGAAAGTTAAAGCCCA  | NG_001173    | PHKBP2  | PHOSPHORYLASE KINASE, BETA PSEUDOGENE 2                                                       | -1.10         | 0.84        | 1.53         | 0.68       | -2.63           | 0.01    |
| Hs_12plexchip_5_2198  | v2HS_209334 | ATTCCAACACAGACATATCCA   | NM_006608    | PHTF1   | putative homeodomain transcription factor 1 (PHTF1), mRNA                                     | -1.61         | 0.50        | -0.41        | 0.86       | -1.19           | 0.12    |
| Hs_12plexchip_5_6227  | v2HS_221355 | TTTATTGGAAGTGGATGAGAG   | NM_002638    | PI3     | peptidase inhibitor 3, skin-derived (SKALP) (PI3), mRNA                                       | -0.84         | 0.07        | 0.15         | 0.12       | -0.98           | 0.00    |
| Hs_12plexchip_6_1766  | v2HS_97840  | TAAAGCTCTAGAATGATCCGGA  | NM_016166    | PIAS1   | protein inhibitor of activated STAT, 1 (PIAS1), mRNA                                          | -1.41         | 1.97        | 0.67         | 1.54       | -2.08           | 0.23    |
| Hs_12plexchip_4_2502  | v2HS_174061 | ATTGAGAATGCATGAGGAAGCC  | NM_017837    | PIGV    | phosphatidylinositol glycan anchor biosynthesis, class V (PIGV), mRNA                         | -1.51         | 0.69        | -0.71        | 0.11       | -0.80           | 0.18    |
| HsOP00000883          | v2HS_77585  | ATACTGGACTTTAATGACTGGT  | NM_006875    | PIM2    | PIM-2 ONCOGENE                                                                                | -1.05         | 0.75        | 0.08         | 0.63       | -1.12           | 0.12    |
| Hs_12plexchip_4_9658  | v2HS_58415  | ATAAATACTGTGTGACGGTGGC  | NM_006221    | PIN1    | protein (peptidylprolyl cis/trans isomerase) NIMA-interacting 1 (PIN1), mRNA                  | -1.13         | 0.51        | 1.00         | 1.00       | -2.13           | 0.05    |
| Hs_12plexchip_5_6616  | v2HS_234804 | ATTCAGTTCAAGGCACATACGT  | NM_032409    | PINK1   | PTEN induced putative kinase 1 (PINK1), nuclear gene encoding mitochondrial protein, mRNA     | -1.13         | 0.43        | -0.01        | 0.67       | -1.11           | 0.08    |
| HsOP00011923          | v2HS_19861  | TTAAACTTGAAATGGCTCGGCA  | NM_005028    | PIP4K2A | phosphatidylinositol-5-phosphate 4-kinase, type II, alpha (PIP4K2A), mRNA                     | -1.04         | 0.65        | 0.23         | 0.19       | -1.26           | 0.07    |
| Hs_12plexchip_5_9845  | v2HS_229814 | ATAAACATACGGAGGAGTCCGC  | NM_153427    | PITX2   | paired-like homeodomain 2 (PITX2), transcript variant 1, mRNA                                 | -0.91         | 0.60        | 0.49         | 0.41       | -1.40           | 0.03    |
| Hs_12plexchip_2_9910  | v2HS_20770  | TAACAGACTAACAGCATGGGC   | NM_152431    | PIWIL4  | piwi-like 4 (Drosophila) (PIWIL4), mRNA                                                       | -0.75         | 0.64        | 0.74         | 0.27       | -1.49           | 0.04    |
| Hs_12plexchip_6_11224 | v2HS_224114 | ATAAGAGGTGAAGGTATTCCGGA | XM_001133467 | PKD1L3  | PREDICTED:polycystic kidney disease 1-like 3 (PKD1L3), mRNA                                   | -1.23         | 0.49        | -0.32        | 0.40       | -0.91           | 0.07    |
| Hs_12plexchip_4_10173 | v2HS_97624  | TATGTGTCATTGATGATGGCCA  | NM_016112    | PKD2L1  | polycystic kidney disease 2-like 1 (PKD2L1), mRNA                                             | -1.62         | 0.34        | -0.62        | 1.08       | -1.00           | 0.25    |
| Hs_12plexchip_5_4399  | v2HS_259559 | TTACTGGGTGAACACTTGAGCC  | NM_181839    | PKIA    | protein kinase (cAMP-dependent, catalytic) inhibitor alpha (PKIA), transcript variant 7, mRNA | -2.60         | 0.63        | -1.47        | 0.96       | -1.13           | 0.18    |

| Probe ID              | v2HS        | Sequence                | Accession   | Symbol  | Gene Name                                                                                                                    | Mut log2 mean | Mut log2 SD | WT log2 Mean | WT log2 SD | log2 difference | P-value |
|-----------------------|-------------|-------------------------|-------------|---------|------------------------------------------------------------------------------------------------------------------------------|---------------|-------------|--------------|------------|-----------------|---------|
| Hs_12plexchip_5_10351 | v2HS_92232  | ATTCACCAAATCCCATGGGCC   | NM_000300   | PLA2G2A | phospholipase A2, group IIA (platelets, synovial fluid) (PLA2G2A), mRNA                                                      | -1.42         | 0.32        | 0.38         | 0.17       | -1.79           | 0.00    |
| Hs_12plexchip_4_5655  | v2HS_28160  | ATATACTTCAAGACACTCGCCA  | NM_01031689 | PLAA    | phospholipase A2-activating protein (PLAA), transcript variant 1, mRNA                                                       | -1.48         | 1.19        | -0.15        | 1.13       | -1.34           | 0.23    |
| Hs0P00010471          | v2HS_170081 | TTCAAGCTCCAGGATGGGCC    | NM_002659   | PLAUR   | plasminogen activator, urokinase receptor (PLAUR), transcript variant 1, mRNA                                                | -0.74         | 0.53        | 0.29         | 0.30       | -1.03           | 0.06    |
| Hs_12plexchip_3_12018 | v2HS_22403  | ATAGTGGACCAGATCATTGCAG  | NM_153021   | PLB1    | phospholipase B1 (PLB1), mRNA                                                                                                | -0.77         | 1.01        | 0.31         | 0.69       | -1.08           | 0.21    |
| Hs_12plexchip_5_3221  | v2HS_201045 | TAGTATGAAGCCACGTGGACGC  | NM_138790   | PLD4    | phospholipase D family, member 4 (PLD4), mRNA                                                                                | -1.45         | 0.11        | 0.17         | 1.00       | -1.62           | 0.11    |
| Hs0P00002268          | v2HS_60835  | ATGAACTCCCATTAATTCCTT   | NM_021200   | PLEKHB1 | pleckstrin homology domain containing, family B (evectins) member 1 (PLEKHB1), mRNA                                          | -0.98         | 0.57        | 0.44         | 0.29       | -1.42           | 0.03    |
| Hs_12plexchip_5_4091  | v2HS_78311  | TTTAGTGCACATATTAAGTGGT  | NM_006832   | PLEKHC1 | pleckstrin homology domain containing, family C (with FERM domain) member 1 (PLEKHC1), mRNA                                  | -0.90         | 0.26        | 0.13         | 0.45       | -1.03           | 0.04    |
| Hs_12plexchip_5_6733  | v2HS_255275 | ATCAGAACAATCTCCTTGGGC   | NM_022835   | PLEKHG2 | pleckstrin homology domain containing, family G (with RhoGef domain) member 2 (PLEKHG2), mRNA                                | -2.85         | 2.06        | -0.10        | 0.38       | -2.75           | 0.14    |
| Hs_12plexchip_4_4980  | v2HS_203563 | TTATTCTTGCTGTAGAGCGCGT  | NM_015432   | PLEKHG4 | pleckstrin homology domain containing, family G (with RhoGef domain) member 4 (PLEKHG4), mRNA                                | -1.15         | 0.80        | -0.38        | 0.34       | -0.77           | 0.23    |
| Hs0P00000426          | v2HS_19708  | TGTAATTAGGAGTCCCACACAG  | NM_005030   | PLK1    | POLO-LIKE KINASE 1 (DROSOPHILA)                                                                                              | -1.75         | 0.22        | -0.35        | 0.10       | -1.41           | 0.00    |
| Hs0P00011638          | v2HS_19709  | TATTCTGTACAATTCATATGGT  | NM_005030   | PLK1    | polo-like kinase 1 (Drosophila) (PLK1), mRNA                                                                                 | -1.19         | 1.25        | -0.19        | 0.10       | -1.00           | 0.30    |
| Hs_12plexchip_4_9426  | v2HS_91307  | TTTGTCAAATCTGTCTATCTCGT | NM_006622   | PLK2    | polo-like kinase 2 (Drosophila) (PLK2), mRNA                                                                                 | -1.07         | 0.59        | -0.36        | 0.54       | -0.71           | 0.20    |
| Hs_12plexchip_4_7863  | v2HS_93532  | AAGAAACAACATCCAGTGGCCA  | NM_199478   | PLP1    | proteolipid protein 1 (Pelizaeus-Merzbacher disease, spastic paraplegia 2, uncomplicated) (PLP1), transcript variant 2, mRNA | -1.46         | 0.71        | -0.70        | 0.51       | -0.76           | 0.21    |
| Hs_12plexchip_5_3199  | v2HS_198817 | ATAAACTTGTCTATGATTCGCT  | NM_007221   | PMF1    | POLYAMINE-MODULATED FACTOR 1                                                                                                 | -1.84         | 0.50        | -1.01        | 0.34       | -0.84           | 0.08    |
| Hs_12plexchip_6_6873  | v2HS_160694 | TATTTCTCACACCTGCTCGCGT  | NM_173516   | PNLDC1  | poly(A)-specific ribonuclease (PARN)-like domain containing 1 (PNLDC1), mRNA                                                 | -1.95         | 0.83        | -0.32        | 1.41       | -1.63           | 0.18    |
| Hs_12plexchip_5_9437  | v2HS_267706 | AACATACAGATCTAGCTGCCCT  | NM_004650   | PNPLA4  | patatin-like phospholipase domain containing 4 (PNPLA4), mRNA                                                                | -1.23         | 0.21        | 0.08         | 0.37       | -1.31           | 0.01    |
| Hs_12plexchip_5_6895  | v2HS_261985 | ATGAATGCCACATAGGGCCGG   | NM_015352   | POFUT1  | protein O-fucosyltransferase 1 (POFUT1), transcript variant 1, mRNA                                                          | -0.81         | 0.72        | -0.07        | 0.55       | -0.74           | 0.23    |
| Hs_12plexchip_6_1230  | v2HS_154166 | TAATGATGAACTCTAAATGGG   | NM_016937   | POLA1   | polymerase (DNA directed), alpha 1 (POLA1), mRNA                                                                             | -2.90         | 0.61        | -0.06        | 0.35       | -2.84           | 0.00    |
| Hs_12plexchip_6_2203  | v2HS_154165 | ATATCTAATCCTTTGAGCTCCT  | NM_016937   | POLA1   | polymerase (DNA directed), alpha 1 (POLA1), mRNA                                                                             | -2.88         | 1.03        | -1.44        | 1.34       | -1.45           | 0.22    |
| Hs_12plexchip_2_6022  | v2HS_170204 | TTGATTCTGAAGTGAAGCTGGG  | NM_002690   | POLB    | polymerase (DNA directed), beta (POLB), mRNA                                                                                 | -0.84         | 0.46        | -0.03        | 0.25       | -0.81           | 0.07    |
| Hs_12plexchip_4_4716  | v2HS_202193 | TTCCAGATAAAGCTGGTCCGC   | NM_006591   | POLD3   | polymerase (DNA-directed), delta 3, accessory subunit (POLD3), mRNA                                                          | -1.21         | 0.97        | -0.37        | 0.47       | -0.84           | 0.28    |
| Hs_12plexchip_4_5532  | v2HS_138460 | ATTCACAGTCATCTTGGTGCCT  | NM_178136   | POLDIP3 | polymerase (DNA-directed), delta interacting protein 3 (POLDIP3), transcript variant 2, mRNA                                 | -1.50         | 0.53        | -0.52        | 1.12       | -0.98           | 0.27    |
| Hs_12plexchip_2_4638  | v2HS_181050 | GAAGCAGGTAGGGAGAAGAGGT  | AF128541    | POLE    | POLYMERASE (DNA DIRECTED), EPSILON                                                                                           | -0.94         | 0.48        | -0.24        | 0.14       | -0.70           | 0.12    |
| Hs_12plexchip_2_4787  | v2HS_170220 | TTTGTGATTCCAGAGCACGG    | NM_002693   | POLG    | polymerase (DNA directed), gamma (POLG), mRNA                                                                                | -0.92         | 0.21        | 0.13         | 0.12       | -1.05           | 0.00    |
| Hs_12plexchip_4_3123  | v2HS_170221 | TTAAACTGCATTAGTAAGCGCT  | NM_002693   | POLG    | polymerase (DNA directed), gamma (POLG), mRNA                                                                                | -1.13         | 0.18        | 0.64         | 1.64       | -1.77           | 0.20    |
| Hs_12plexchip_6_754   | v2HS_98038  | TAAATGTATCTTGGTGACTCCA  | NM_016218   | POLK    | polymerase (DNA directed) kappa (POLK), mRNA                                                                                 | -0.80         | 0.35        | 0.48         | 0.70       | -1.27           | 0.07    |
| Hs_12plexchip_4_486   | v2HS_70473  | AATGAGACACTGCACATCAGGG  | NM_013284   | POLM    | polymerase (DNA directed), mu (POLM), mRNA                                                                                   | -1.98         | 0.77        | -0.04        | 0.28       | -1.94           | 0.04    |
| Hs_12plexchip_5_1259  | v2HS_67630  | TATAATGATCTCGAACCCTGGG  | NM_004875   | POLR1C  | polymerase (RNA) I polypeptide C, 30kDa (POLR1C), transcript variant 2, mRNA                                                 | -2.02         | 0.43        | 0.56         | 2.32       | -2.58           | 0.19    |
| Hs0P00000733          | v2HS_58143  | TTTACATCTAAGATTAGATCCA  | NM_006232   | POLR2H  | polymerase (RNA) II (DNA directed) polypeptide H (POLR2H), mRNA                                                              | -2.34         | 0.15        | -1.21        | 0.27       | -1.13           | 0.01    |
| Hs_12plexchip_5_6194  | v2HS_262739 | TTGTGATTAATGATGTTTCCC   | NM_006234   | POLR2J  | polymerase (RNA) II (DNA directed) polypeptide J, 13.3kDa (POLR2J), mRNA                                                     | -1.84         | 0.44        | -0.85        | 0.21       | -0.99           | 0.04    |

| Probe ID              | v2HS        | Sequence                | Accession    | Symbol   | Gene Name                                                                                                                                      | Mut log2 mean | Mut log2 SD | WT log2 Mean | WT log2 SD | log2 difference | P-value |
|-----------------------|-------------|-------------------------|--------------|----------|------------------------------------------------------------------------------------------------------------------------------------------------|---------------|-------------|--------------|------------|-----------------|---------|
| Hs_12plexchip_6_27    | v2HS_155605 | TTTATATACAAGGCCAACGCCCA | NM_018082    | POLR3B   | polymerase (RNA) III (DNA directed) polypeptide B (POLR3B), mRNA                                                                               | -2.67         | 0.28        | -0.95        | 0.96       | -1.72           | 0.08    |
| Hs_12plexchip_4_475   | v2HS_201722 | AATACATTGAGTAAAGAGTG    | NM_006466    | POLR3F   | polymerase (RNA) III (DNA directed) polypeptide F, 39 kDa (POLR3F), mRNA                                                                       | -2.61         | 0.59        | 0.64         | 0.29       | -3.25           | 0.00    |
| Hs_12plexchip_5_10139 | v2HS_229159 | TAATCACTCTATTTTCAGTGGGA | NM_001018161 | PON2     | paraoxonase 2 (PON2), transcript variant 2, mRNA                                                                                               | -2.19         | 0.72        | -0.67        | 0.66       | -1.52           | 0.06    |
| Hs_12plexchip_6_4178  | v2HS_170242 | TTTCTTTTCGGTGTCTGTGTGCT | NM_002698    | POU2F2   | POU class 2 homeobox 2 (POU2F2), mRNA                                                                                                          | -2.16         | 0.50        | -0.89        | 1.51       | -1.27           | 0.28    |
| Hs0P00000858          | v2HS_58128  | TTTGAGGTCCAGTTTCTCGGCG  | NM_006237    | POU4F1   | POU class 4 homeobox 1 (POU4F1), mRNA                                                                                                          | -1.00         | 0.80        | -0.12        | 0.74       | -0.88           | 0.23    |
| Hs_12plexchip_4_12043 | v2HS_170252 | TTTAAGGTCCAGTTTCTCAGCG  | NM_002700    | POU4F3   | POU class 4 homeobox 3 (POU4F3), mRNA                                                                                                          | -1.40         | 0.41        | -0.01        | 1.41       | -1.38           | 0.23    |
| Hs_12plexchip_6_1104  | v2HS_27774  | TTCTCTTTCCAAGACAGCACGA  | NM_177423    | PPFIA1   | protein tyrosine phosphatase, receptor type, f polypeptide (PTPRF), interacting protein (liprin), alpha 1 (PPFIA1), transcript variant 1, mRNA | -0.75         | 0.46        | 0.66         | 1.05       | -1.41           | 0.13    |
| Hs_12plexchip_5_10062 | v2HS_97355  | AAGCTTCATGACTTGCAAGGCC  | NM_016059    | PPIL1    | peptidylprolyl isomerase (cyclophilin)-like 1 (PPIL1), mRNA                                                                                    | -0.88         | 0.67        | 0.21         | 0.38       | -1.09           | 0.09    |
| Hs_12plexchip_6_2534  | v2HS_170282 | TTAATGACTTCCTTAGTCACT   | NM_002705    | PPL      | periplakin (PPL), mRNA                                                                                                                         | -2.03         | 1.03        | -0.55        | 1.15       | -1.47           | 0.17    |
| Hs_12plexchip_5_10616 | v2HS_95988  | ATATCATGAGTCTTTCTGAGCT  | NM_014906    | PPM1E    | protein phosphatase 1E (PP2C domain containing) (PPM1E), mRNA                                                                                  | -1.09         | 0.41        | -0.39        | 0.63       | -0.70           | 0.19    |
| Hs_12plexchip_6_3930  | v2HS_202496 | ATCAGCAAGGAAGGTGTGGGCT  | NM_138558    | PPP1R8   | protein phosphatase 1, regulatory (inhibitor) subunit 8 (PPP1R8), transcript variant 2, mRNA                                                   | -1.27         | 1.02        | -0.19        | 0.53       | -1.08           | 0.20    |
| Hs0P00002401          | v2HS_170331 | ATGTTTCTAACTTTGTCTCT    | NM_002713    | PPP1R8   | PROTEIN PHOSPHATASE 1, REGULATORY (INHIBITOR) SUBUNIT 8                                                                                        | -1.45         | 0.70        | 0.02         | 0.59       | -1.47           | 0.05    |
| Hs0P00002406          | v2HS_202452 | TTTAAACCTCAGCTTAACTGCA  | NM_014110    | PPP1R8   | PROTEIN PHOSPHATASE 1, REGULATORY (INHIBITOR) SUBUNIT 8                                                                                        | -0.78         | 0.71        | 0.42         | 0.22       | -1.20           | 0.09    |
| Hs_12plexchip_4_12156 | v2HS_170348 | ATTGGAGATGATATCAAACGA   | NM_002716    | PPP2R1B  | protein phosphatase 2 (formerly 2A), regulatory subunit A, beta isoform (PPP2R1B), transcript variant 1, mRNA                                  | -0.90         | 1.83        | 1.44         | 0.90       | -2.35           | 0.14    |
| Hs_12plexchip_2_2573  | v2HS_74523  | ATGTTTAAACAAATCAATTCCC  | NM_015342    | PPWD1    | peptidylprolyl isomerase domain and WD repeat containing 1 (PPWD1), mRNA                                                                       | -0.78         | 0.76        | 1.14         | 0.30       | -1.92           | 0.03    |
| Hs_12plexchip_6_3210  | v2HS_173692 | AATGAGGTAGGTGGTAGGAGGG  | NM_001040125 | PQLC2    | PQ loop repeat containing 2 (PQLC2), transcript variant 1, mRNA                                                                                | -0.79         | 0.15        | 0.24         | 0.80       | -1.02           | 0.15    |
| Hs_12plexchip_5_12716 | v2HS_44323  | ATTGACTGACGGAGAACAGCT   | NM_012406    | PRDM4    | PR domain containing 4 (PRDM4), mRNA                                                                                                           | -1.97         | 1.05        | -0.48        | 1.14       | -1.49           | 0.17    |
| Hs_12plexchip_6_422   | v2HS_63833  | TTAGCTTAAGCCTGTCTGCTGA  | NM_013397    | PRICKLE4 | prickle homolog 4 (Drosophila) (PRICKLE4), mRNA                                                                                                | -1.53         | 1.14        | -0.39        | 1.04       | -1.14           | 0.27    |
| Hs_12plexchip_4_7603  | v2HS_170430 | TTAGAAAGTGATGTTAAAGCCT  | NM_002736    | PRKAR2B  | protein kinase, cAMP-dependent, regulatory, type II, beta (PRKAR2B), mRNA                                                                      | -1.13         | 0.55        | 0.06         | 1.01       | -1.19           | 0.17    |
| Hs_12plexchip_4_1961  | v2HS_222846 | TTATTGTAATTGAGGTCACAGGT | NM_001001329 | PRKCSH   | protein kinase C substrate 80K-H (PRKCSH), transcript variant 2, mRNA                                                                          | -0.75         | 0.26        | 0.33         | 0.27       | -1.09           | 0.01    |
| Hs_12plexchip_5_11186 | v2HS_131456 | TATTGTTCTCAGGAGTCCCGGG  | NM_000949    | PRLR     | prolactin receptor (PRLR), mRNA                                                                                                                | -0.99         | 1.11        | -0.06        | 0.55       | -0.93           | 0.28    |
| Hs_12plexchip_3_11179 | v2HS_235964 | TAAGGAAACACCCCTAATTGCCT | NM_032414    | PROK1    | prokineticin 1 (PROK1), mRNA                                                                                                                   | -0.95         | 0.28        | -0.23        | 0.42       | -0.71           | 0.08    |
| Hs_12plexchip_5_12847 | v2HS_71819  | TTGTTCTATAGGAAGGACTCGT  | NM_006017    | PROM1    | prominin 1 (PROM1), mRNA                                                                                                                       | -1.26         | 0.24        | -0.11        | 0.49       | -1.15           | 0.04    |
| Hs_12plexchip_4_9414  | v2HS_87229  | ATAAACATGATTAGAGACAGGG  | NM_014502    | PRPF19   | PRP19/PSO4 pre-mRNA processing factor 19 homolog (S. cerevisiae) (PRPF19), mRNA                                                                | -0.94         | 0.56        | 0.89         | 0.19       | -1.83           | 0.02    |
| Hs_12plexchip_4_9165  | v2HS_12663  | ATCTTGTTACCACTATCACCA   | NM_007244    | PRR4     | proline rich 4 (lacrima) (PRR4), transcript variant 2, mRNA                                                                                    | -0.72         | 0.90        | 0.53         | 0.16       | -1.24           | 0.14    |
| Hs0P00004090          | v2HS_45919  | AATCAAGTCATACCTGGCCA    | NM_020200    | PRTFDC1  | phosphoribosyl transferase domain containing 1 (PRTFDC1), mRNA                                                                                 | -2.24         | 0.69        | -0.96        | 1.30       | -1.28           | 0.23    |
| Hs_12plexchip_6_3798  | v2HS_170634 | ATGTCGTTTCAGTTTGTCTCCG  | NM_002777    | PRTN3    | PROTEINASE 3 (SERINE PROTEINASE, NEUTROPHIL, WEGENER GRANULOMATOSIS AUTOANTIGEN)                                                               | -0.78         | 0.39        | -0.03        | 0.24       | -0.75           | 0.06    |
| Hs_12plexchip_5_6793  | v2HS_89936  | TAATAATGTAAGGCACAAACCA  | NM_000021    | PSEN1    | presenilin 1 (Alzheimer disease 3) (PSEN1), mRNA                                                                                               | -2.71         | 0.49        | -0.31        | 0.86       | -2.39           | 0.02    |
| Hs_12plexchip_6_755   | v2HS_159974 | TTTCTTGTCTCCACATATGCC   | NM_033126    | PSKH2    | protein serine kinase H2 (PSKH2), mRNA                                                                                                         | -1.34         | 0.83        | 0.09         | 0.77       | -1.42           | 0.10    |
| Hs_12plexchip_3_11631 | v2HS_170669 | AATAGTTAGCAGATGGACAGGT  | NM_002786    | PSMA1    | proteasome (prosome, macropain) subunit, alpha type, 1 (PSMA1), transcript variant 2, mRNA                                                     | -1.28         | 0.73        | -0.10        | 0.89       | -1.18           | 0.15    |
| Hs_12plexchip_4_8883  | v2HS_170688 | TTATTTCCAATGCATGTGGCCT  | NM_001102667 | PSMA4    | proteasome (prosome, macropain) subunit, alpha type, 4 (PSMA4), transcript variant 2, mRNA                                                     | -1.28         | 0.38        | -0.50        | 0.47       | -0.78           | 0.09    |

| Probe ID              | v2HS        | Sequence               | Accession    | Symbol   | Gene Name                                                                                                                      | Mut log2 mean | Mut log2 SD | WT log2 Mean | WT log2 SD | log2 difference | P-value |
|-----------------------|-------------|------------------------|--------------|----------|--------------------------------------------------------------------------------------------------------------------------------|---------------|-------------|--------------|------------|-----------------|---------|
| Hs_12plexchip_6_4428  | v2HS_170685 | AATACCTTTGAGCAATGAGCCT | NM_001102667 | PSMA4    | proteasome (prosome, macropain) subunit, alpha type, 4 (PSMA4), transcript variant 2, mRNA                                     | -1.16         | 1.04        | 0.09         | 0.96       | -1.24           | 0.20    |
| Hs_12plexchip_4_2478  | v2HS_221829 | TTCTCTTCCACAGCTAGGCA   | NM_002790    | PSMA5    | proteasome (prosome, macropain) subunit, alpha type, 5 (PSMA5), mRNA                                                           | -1.84         | 0.37        | -0.33        | 0.55       | -1.51           | 0.02    |
| Hs_12plexchip_4_7706  | v2HS_170690 | ATTCTCTTCCACAGCTAGGC   | NM_002790    | PSMA5    | proteasome (prosome, macropain) subunit, alpha type, 5 (PSMA5), mRNA                                                           | -1.92         | 0.21        | -0.74        | 0.61       | -1.17           | 0.07    |
| Hs_12plexchip_6_3705  | v2HS_275540 | TTGATTTCCAGTTAGCTGCCT  | NM_002791    | PSMA6    | proteasome (prosome, macropain) subunit, alpha type, 6 (PSMA6), mRNA                                                           | -2.77         | 0.90        | -1.38        | 1.32       | -1.39           | 0.21    |
| Hs_12plexchip_6_890   | v2HS_170707 | AATAAATGGAATGGAAGGCCT  | NM_002792    | PSMA7    | proteasome (prosome, macropain) subunit, alpha type, 7 (PSMA7), mRNA                                                           | -0.73         | 0.55        | 0.01         | 0.83       | -0.73           | 0.28    |
| Hs_12plexchip_4_2902  | v2HS_170731 | TTGAAACCGTTGTAAGAACGG  | NM_002796    | PSMB4    | proteasome (prosome, macropain) subunit, beta type, 4 (PSMB4), mRNA                                                            | -0.71         | 0.48        | 0.78         | 0.23       | -1.49           | 0.02    |
| Hs_12plexchip_4_3837  | v2HS_170736 | TATAAATAGGATGGAGGATGGG | NM_002797    | PSMB5    | proteasome (prosome, macropain) subunit, beta type, 5 (PSMB5), mRNA                                                            | -2.15         | 0.49        | 0.66         | 0.27       | -2.81           | 0.00    |
| Hs_12plexchip_4_4471  | v2HS_170733 | ATTCGAAGCTCATAGATTCGA  | NM_002797    | PSMB5    | proteasome (prosome, macropain) subunit, beta type, 5 (PSMB5), mRNA                                                            | -1.33         | 0.33        | -0.20        | 0.92       | -1.13           | 0.16    |
| Hs_12plexchip_2_6001  | v2HS_170743 | ATTGCATACATAATCCAGGA   | NM_002798    | PSMB6    | proteasome (prosome, macropain) subunit, beta type, 6 (PSMB6), mRNA                                                            | -1.58         | 0.78        | 0.30         | 0.65       | -1.88           | 0.03    |
| Hs_12plexchip_4_8031  | v2HS_170784 | TAATGGGTCTACCTGTGGGC   | NM_002805    | PSMC5    | proteasome (prosome, macropain) 26S subunit, ATPase, 5 (PSMC5), mRNA                                                           | -3.40         | 1.60        | -1.61        | 0.33       | -1.79           | 0.19    |
| Hs_12plexchip_4_8198  | v2HS_170848 | AATAATCGAAGTTGATAGGA   | NM_002816    | PSMD12   | proteasome (prosome, macropain) 26S subunit, non-ATPase, 12 (PSMD12), mRNA                                                     | -2.60         | 0.22        | -0.78        | 0.32       | -1.82           | 0.00    |
| Hs_12plexchip_3_6679  | v2HS_95516  | ATAGAATCAATATCCAATCGG  | NM_014814    | PSMD6    | proteasome (prosome, macropain) 26S subunit, non-ATPase, 6 (PSMD6), mRNA                                                       | -4.35         | 0.13        | -1.97        | 0.73       | -2.38           | 0.03    |
| Hs_12plexchip_5_4340  | v2HS_78720  | TTTCATCTACCTGTTCTCAGGC | NM_006814    | PSMF1    | proteasome (prosome, macropain) inhibitor subunit 1 (PI31) (PSMF1), transcript variant 1, mRNA                                 | -1.10         | 0.84        | -0.34        | 0.31       | -0.75           | 0.25    |
| Hs_12plexchip_4_3920  | v2HS_170902 | TTTGTCTTAGGAAGCTTGCC   | NM_002827    | PTPN1    | protein tyrosine phosphatase, non-receptor type 1 (PTPN1), mRNA                                                                | -1.34         | 0.30        | -0.25        | 0.24       | -1.08           | 0.01    |
| Hs_12plexchip_6_9690  | v2HS_252883 | ATTTCAGTAGAATCATCTGGG  | NM_007062    | PWP1     | PWP1 homolog (S. cerevisiae) (PWP1), mRNA                                                                                      | -0.80         | 0.27        | 0.59         | 0.17       | -1.39           | 0.00    |
| Hs_12plexchip_6_10419 | v2HS_19130  | AATAGTCAGACGATATGTGAC  | NM_005051    | QARS     | glutamyl-tRNA synthetase (QARS), mRNA                                                                                          | -2.33         | 0.50        | 1.14         | 1.42       | -3.47           | 0.04    |
| Hs_12plexchip_5_9311  | v2HS_231422 | ATACTGTGTCTGTTACTCGGC  | NM_014925    | R3HDM2   | R3H domain containing 2 (R3HDM2), mRNA                                                                                         | -1.12         | 0.99        | -0.11        | 0.70       | -1.02           | 0.23    |
| Hs0P00001171          | v2HS_58078  | ATAGACCATCAAATTAACCTG  | NM_020673    | RAB22A   | RAB22A, member RAS oncogene family (RAB22A), mRNA                                                                              | -1.01         | 0.27        | -0.16        | 0.98       | -0.85           | 0.27    |
| Hs_12plexchip_6_2596  | v2HS_99448  | TTAAATTATCCAGGTAGGACCA | NM_031296    | RAB33B   | RAB33B, member RAS oncogene family (RAB33B), mRNA                                                                              | -0.73         | 0.59        | -0.02        | 0.31       | -0.71           | 0.16    |
| Hs_12plexchip_5_4862  | v2HS_81488  | TTATACAAGGATAAGTCAGCCT | NM_175624    | RAB31P   | RAB3A interacting protein (rabin3) (RAB31P), transcript variant beta 1, mRNA                                                   | -1.16         | 0.59        | -0.32        | 0.50       | -0.85           | 0.13    |
| Hs0P00009092          | v2HS_144193 | ATCCAGTTCGATTCAACCGT   | NM_001032726 | RAB41    | RAB41, member RAS oncogene family (RAB41), mRNA                                                                                | -1.14         | 0.75        | -0.39        | 0.44       | -0.76           | 0.22    |
| Hs_12plexchip_6_4010  | v2HS_276051 | ATAGGCCAGAAAGCTAAGGCCA | NM_002868    | RAB5B    | RAB5B, member RAS oncogene family (RAB5B), mRNA                                                                                | -1.10         | 0.23        | -0.11        | 0.34       | -0.99           | 0.02    |
| Hs_12plexchip_5_12710 | v2HS_243193 | ATCCGGATCACAAATTGAGGG  | NM_003929    | RAB7L1   | RAB7, member RAS oncogene family-like 1 (RAB7L1), mRNA                                                                         | -0.83         | 0.23        | -0.02        | 0.55       | -0.80           | 0.11    |
| Hs_12plexchip_6_1618  | v2HS_115619 | ATCAGAACCTGTCTCTTACCC  | NM_016370    | RAB9B    | RAB9B, member RAS oncogene family (RAB9B), mRNA                                                                                | -2.64         | 0.57        | -1.05        | 0.51       | -1.59           | 0.02    |
| Hs_12plexchip_3_8825  | v2HS_228604 | ATTCTCCAGGAAATGCAITGGT | NM_198829    | RAC1     | ras-related C3 botulinum toxin substrate 1 (rho family, small GTP binding protein Rac1) (RAC1), transcript variant Rac1c, mRNA | -0.80         | 0.58        | 0.31         | 0.11       | -1.11           | 0.08    |
| Hs_12plexchip_6_3778  | v2HS_254742 | TTTGACCTGCTACTGGAAAGGC | NM_002874    | RAD23B   | RAD23 homolog B (S. cerevisiae) (RAD23B), mRNA                                                                                 | -1.18         | 1.22        | 0.76         | 2.40       | -1.94           | 0.30    |
| Hs_12plexchip_3_10454 | v2HS_143342 | TAAGTCCATTGGAAACTGAGGG | NM_001099218 | RAD51AP2 | RAD51-associated protein 2 (RAD51AP2), mRNA                                                                                    | -1.24         | 1.02        | -0.27        | 0.38       | -0.97           | 0.24    |
| Hs_12plexchip_2_3053  | v2HS_88184  | ATATGTGACAATGTTGTGCCT  | NM_015106    | RAD54L2  | RAD54-like 2 (S. cerevisiae) (RAD54L2), mRNA                                                                                   | -0.94         | 0.53        | 0.09         | 0.62       | -1.03           | 0.10    |
| Hs_12plexchip_2_10317 | v2HS_20443  | AATGGATATAGGAGCATGTGTA | NM_152442    | RAD9B    | RAD9 homolog B (S. cerevisiae) (RAD9B), mRNA                                                                                   | -0.89         | 0.29        | -0.15        | 0.28       | -0.74           | 0.03    |
| Hs_12plexchip_5_3410  | v2HS_13044  | AAGAGTAGATACATTGTACCCA | NM_000448    | RAG1     | recombination activating gene 1 (RAG1), mRNA                                                                                   | -0.78         | 0.88        | 0.84         | 0.93       | -1.62           | 0.09    |

| Probe ID              | v2HS        | Sequence                | Accession    | Symbol   | Gene Name                                                                                              | Mut log2 mean | Mut log2 SD | WT log2 Mean | WT log2 SD | log2 difference | P-value |
|-----------------------|-------------|-------------------------|--------------|----------|--------------------------------------------------------------------------------------------------------|---------------|-------------|--------------|------------|-----------------|---------|
| Hs_12plexchip_2_449   | v2HS_93554  | TTTAAGGGTAGGACTCTTGGG   | NM_000536    | RAG2     | recombination activating gene 2 (RAG2), mRNA                                                           | -1.16         | 0.21        | -0.37        | 0.31       | -0.79           | 0.03    |
| Hs_12plexchip_4_623   | v2HS_66320  | ATTAGGGAGGTACTACAGCGG   | NM_001100428 | RAP1GDS1 | RAP1, GTP-GDP dissociation stimulator 1 (RAP1GDS1), transcript variant 4, mRNA                         | -1.18         | 0.33        | -0.19        | 0.34       | -0.99           | 0.02    |
| Hs_12plexchip_5_579   | v2HS_38146  | ATTCGTGTGGTCAATGAGGG    | NM_005312    | RAPGEF1  | Rap guanine nucleotide exchange factor (GEF) 1 (RAPGEF1), transcript variant 1, mRNA                   | -2.14         | 1.28        | -0.42        | 0.44       | -1.72           | 0.13    |
| Hs_12plexchip_4_1028  | v2HS_199986 | TTTACCATAACAATCTCTCTCT  | NM_014247    | RAPGEF2  | Rap guanine nucleotide exchange factor (GEF) 2 (RAPGEF2), mRNA                                         | -1.47         | 1.16        | -0.28        | 0.91       | -1.18           | 0.24    |
| Hs_12plexchip_6_4142  | v2HS_276400 | TTTCTCAAAGTTGACGTGTCCA  | NM_175062    | RASGEF1C | RasGEF domain family, member 1C (RASGEF1C), mRNA                                                       | -1.01         | 0.33        | -0.23        | 0.77       | -0.79           | 0.21    |
| Hs_12plexchip_2_6456  | v2HS_179646 | ATAATGTAAGGAGTCTTTCGT   | NM_006909    | RASGRF2  | Ras protein-specific guanine nucleotide-releasing factor 2 (RASGRF2), mRNA                             | -1.12         | 0.32        | -0.27        | 0.40       | -0.85           | 0.05    |
| Hs_12plexchip_2_3771  | v2HS_76793  | TTTGACTTTGGGAGACAGAGCC  | NM_206827    | RASL11A  | RAS-like, family 11, member A (RASL11A), mRNA                                                          | -1.17         | 0.50        | -0.19        | 0.43       | -0.98           | 0.06    |
| Hs0P00005044          | v2HS_94795  | ATATTCTTCTTCGTCTCGCGCA  | NM_006910    | RBBP6    | RETINOBLASTOMA BINDING PROTEIN 6                                                                       | -1.76         | 0.21        | -0.75        | 0.92       | -1.01           | 0.19    |
| Hs_12plexchip_5_1445  | v2HS_247544 | TTGTAATGTTTGGCATTGCT    | NM_184234    | RBM39    | RNA binding motif protein 39 (RBM39), transcript variant 1, mRNA                                       | -1.64         | 0.36        | 0.07         | 1.45       | -1.71           | 0.17    |
| Hs_12plexchip_6_10160 | v2HS_195463 | TATCCTGTTGCGCTGTCGAGGT  | NM_005105    | RBM8A    | RNA binding motif protein 8A (RBM8A), mRNA                                                             | -4.40         | 0.15        | -0.52        | 3.15       | -3.88           | 0.17    |
| Hs_12plexchip_5_3595  | v2HS_255132 | ATGAAACTGAACAGTGGATCGT  | NM_015436    | RCHY1    | ring finger and CHY zinc finger domain containing 1 (RCHY1), transcript variant 1, mRNA                | -1.35         | 1.05        | 1.41         | 1.37       | -2.76           | 0.05    |
| Hs_12plexchip_4_6187  | v2HS_32989  | ATTTAGGGTTCCAAAGACTGGG  | NM_002909    | REG1A    | regenerating islet-derived 1 alpha (pancreatic stone protein, pancreatic thread protein) (REG1A), mRNA | -0.83         | 0.43        | 0.10         | 0.50       | -0.93           | 0.07    |
| Hs_12plexchip_4_5435  | v2HS_19386  | TATAAACATTATCAATTGCCCA  | NM_173054    | RELN     | reelin (RELN), transcript variant 2, mRNA                                                              | -1.31         | 0.47        | 1.81         | 1.94       | -3.13           | 0.10    |
| Hs_12plexchip_6_7075  | v2HS_286133 | TTAGATTTCTTGGTTGGGACCC  | NM_032579    | RETNLB   | resistin like beta (RETNLB), mRNA                                                                      | -1.07         | 0.65        | 0.35         | 1.01       | -1.42           | 0.12    |
| Hs_12plexchip_4_11944 | v2HS_32856  | GTAGAATTGCGACACAAGATCA  | NM_181558    | RFC3     | replication factor C (activator 1) 3, 38kDa (RFC3), transcript variant 2, mRNA                         | -1.07         | 0.74        | 0.01         | 0.57       | -1.08           | 0.12    |
| Hs_12plexchip_5_5089  | v2HS_261707 | ATTAGATACAGACACAATGCCA  | NM_181578    | RFC5     | replication factor C (activator 1) 5, 36.5kDa (RFC5), transcript variant 2, mRNA                       | -0.91         | 0.06        | 0.11         | 0.36       | -1.03           | 0.04    |
| Hs_12plexchip_5_3694  | v2HS_254848 | CAAACCTATTGAGTCCATGTT   | NM_006605    | RFPL2    | ret finger protein-like 2 (RFPL2), transcript variant 1, mRNA                                          | -2.59         | 0.38        | -1.72        | 0.62       | -0.88           | 0.12    |
| Hs_12plexchip_4_7588  | v2HS_191440 | AATTGGGTGATGAGTTCCGGT   | NM_032491    | RFX4     | regulatory factor X, 4 (influences HLA class II expression) (RFX4), transcript variant 1, mRNA         | -2.14         | 0.69        | -0.64        | 0.41       | -1.50           | 0.04    |
| Hs_12plexchip_5_8462  | v2HS_114554 | AATACATATGGTCTAACTCCT   | NM_015668    | RGS22    | regulator of G-protein signaling 22 (RGS22), mRNA                                                      | -1.19         | 1.03        | -0.27        | 0.48       | -0.92           | 0.26    |
| Hs_12plexchip_5_12799 | v2HS_240324 | TAGAATGAAGAGACTATAAGCC  | NM_003617    | RGS5     | regulator of G-protein signaling 5 (RGS5), mRNA                                                        | -1.50         | 1.73        | 0.62         | 0.67       | -2.12           | 0.16    |
| Hs_12plexchip_4_2121  | v2HS_219058 | TAGTAAATAAACACTGCCAGCT  | NM_017821    | RHBDL2   | rhomboid, veinlet-like 2 (Drosophila) (RHBDL2), mRNA                                                   | -1.84         | 1.15        | 1.80         | 1.29       | -3.64           | 0.02    |
| Hs_12plexchip_5_3401  | v2HS_95941  | TTAGATTTGAGAAAGTGTACCA  | NM_014899    | RHOBTB3  | Rho-related BTB domain containing 3 (RHOBTB3), mRNA                                                    | -0.73         | 1.18        | 0.54         | 0.66       | -1.28           | 0.20    |
| Hs_12plexchip_5_10250 | v2HS_96371  | TTTCTCATGAATATGTCGCT    | NM_014989    | RIMS1    | regulating synaptic membrane exocytosis 1 (RIMS1), mRNA                                                | -1.32         | 0.67        | 0.04         | 0.54       | -1.37           | 0.05    |
| Hs0P00000957          | v2HS_117526 | TATGGTTCTCATTCTATTGCC   | NM_031480    | RIOK1    | RIO KINASE 1 (YEAST)                                                                                   | -1.38         | 0.20        | -0.55        | 0.17       | -0.82           | 0.01    |
| Hs_12plexchip_6_1994  | v2HS_226463 | TTTGCTAAAGGGATAGCTTGGC  | NM_199462    | RIPK5    | receptor interacting protein kinase 5 (RIPK5), transcript variant 2, mRNA                              | -1.17         | 0.58        | -0.23        | 0.99       | -0.93           | 0.25    |
| Hs_12plexchip_6_8571  | v2HS_223596 | ATATAGTGAATTCCAAAGCCCA  | NM_199462    | RIPK5    | receptor interacting protein kinase 5 (RIPK5), transcript variant 2, mRNA                              | -0.86         | 0.11        | 0.14         | 0.67       | -1.00           | 0.12    |
| Hs_12plexchip_4_9499  | v2HS_43940  | TATCTGCATCAAATACTGAGCT  | NM_012421    | RLF      | rearranged L-myc fusion (RLF), mRNA                                                                    | -1.25         | 0.77        | 0.03         | 0.71       | -1.28           | 0.10    |
| Hs_12plexchip_4_1882  | v2HS_214378 | CTTGATGCTGAATTTACAGCGG  | X04255       | RN7SLP5  | RNA, 7SL, CYTOPLASMIC, PSEUDOGENE 5                                                                    | -0.98         | 0.40        | -0.01        | 0.49       | -0.97           | 0.06    |
| Hs_12plexchip_5_3903  | v2HS_14672  | ATACAATTCAATGCACACAGCA  | NM_194463    | RNF128   | ring finger protein 128 (RNF128), transcript variant 1, mRNA                                           | -0.87         | 0.66        | -0.07        | 0.56       | -0.80           | 0.19    |
| Hs_12plexchip_5_3691  | v2HS_175587 | TTTACTGATGGCTTCTTGGCT   | NM_018434    | RNF130   | ring finger protein 130 (RNF130), mRNA                                                                 | -1.07         | 0.33        | -0.33        | 0.37       | -0.74           | 0.06    |
| Hs_12plexchip_4_10413 | v2HS_100984 | AAGAATGTTGACGTGTTGCCCG  | NM_178841    | RNF166   | ring finger protein 166 (RNF166), mRNA                                                                 | -1.45         | 0.74        | 0.13         | 1.41       | -1.59           | 0.18    |
| Hs0P00006251          | v2MM_94009  | TTTGTTCTCCTCAAGCTCTGCA  | NM_019592    | RNF20    | HYPOTHETICAL PROTEIN FLJ20382                                                                          | -0.88         | 0.03        | -0.14        | 0.92       | -0.74           | 0.30    |
| Hs_12plexchip_5_10273 | v2HS_95293  | TTGTTCTTGAAGCTGTAGTACCT | NM_014771    | RNF40    | ring finger protein 40 (RNF40), mRNA                                                                   | -0.74         | 0.46        | -0.01        | 0.27       | -0.72           | 0.09    |
| Hs0P00005031          | v2HS_95298  | TATTCATCACAATTAACAGCCT  | NM_014771    | RNF40    | RING FINGER PROTEIN 40                                                                                 | -1.09         | 0.54        | 0.21         | 0.64       | -1.31           | 0.06    |
| Hs_12plexchip_5_3561  | v2HS_51805  | TTTCAAGGAGACCTAAAGGG    | AK020527     | RNF41    | RING FINGER PROTEIN 41                                                                                 | -0.84         | 0.50        | 0.55         | 0.29       | -1.39           | 0.02    |

| Probe ID              | v2HS        | Sequence               | Accession    | Symbol       | Gene Name                                                                       | Mut log2 mean | Mut log2 SD | WT log2 Mean | WT log2 SD | log2 difference | P-value |
|-----------------------|-------------|------------------------|--------------|--------------|---------------------------------------------------------------------------------|---------------|-------------|--------------|------------|-----------------|---------|
| Hs_12plexchip_4_41    | v2HS_221358 | ATAGTTTAAGGGATATCTTGCT | AK096543     | RP11-506K6.3 | HYPOTHETICAL LOC389362                                                          | -1.19         | 0.26        | -0.17        | 0.73       | -1.02           | 0.12    |
| Hs_12plexchip_2_10249 | v2HS_32164  | TTTAAGAAGAGAAACTCTGAG  | NM_002946    | RPA2         | replication protein A2, 32kDa (RPA2), mRNA                                      | -2.15         | 1.08        | -0.24        | 0.96       | -1.92           | 0.08    |
| Hs_12plexchip_4_8497  | v2HS_92393  | ATTATTTCCGGTAACAACAGCA | NM_001034853 | RPGR         | retinitis pigmentosa GTPase regulator (RPGR), transcript variant C, mRNA        | -0.72         | 0.28        | 0.56         | 0.21       | -1.28           | 0.00    |
| Hs_12plexchip_2_10303 | v2HS_15050  | GTAAC TAGTACTATGTGTGCT | NM_144563    | RPIA         | ribose 5-phosphate isomerase A (ribose 5-phosphate epimerase) (RPIA), mRNA      | -1.20         | 0.85        | -0.37        | 0.79       | -0.83           | 0.28    |
| Hs_12plexchip_3_9604  | v2HS_131580 | TTCTTATAGACGTCCGGACGG  | NM_000977    | RPL13        | ribosomal protein L13 (RPL13), transcript variant 1, mRNA                       | -2.08         | 0.96        | -1.12        | 0.92       | -0.95           | 0.28    |
| Hs_12plexchip_4_7518  | v2HS_149891 | TTCTTGACTCTTTGATATCCT  | NG_001000    | RPL24P1      | RIBOSOMAL PROTEIN L24 PSEUDOGENE 1                                              | -3.47         | 0.44        | -1.69        | 2.12       | -1.78           | 0.28    |
| Hs_12plexchip_3_10290 | v2HS_236675 | TTGTCTGATCATCTTCAGAGTC | NM_000989    | RPL30        | ribosomal protein L30 (RPL30), mRNA                                             | -3.57         | 0.28        | -1.68        | 0.86       | -1.89           | 0.05    |
| Hs0P00008958          | v2HS_131668 | TTGTAGGAAAGCCTACGTCGGT | NM_033625    | RPL34        | ribosomal protein L34 (RPL34), transcript variant 2, mRNA                       | -1.25         | 1.58        | 0.88         | 1.72       | -2.13           | 0.19    |
| Hs_12plexchip_4_9155  | v2HS_198101 | TTAATAACTGTGAGAACACGGG | NM_007209    | RPL35        | ribosomal protein L35 (RPL35), mRNA                                             | -2.25         | 0.19        | -1.06        | 0.38       | -1.19           | 0.02    |
| Hs_12plexchip_4_11541 | v2HS_189837 | ATTAACCCATTTATTACAGGCC | NG_000988    | RPL37AP1     | RIBOSOMAL PROTEIN L37A PSEUDOGENE 1                                             | -1.72         | 0.15        | -0.78        | 0.14       | -0.94           | 0.00    |
| Hs0P00011901          | v2HS_195073 | TTTCAGCTTGATATGGTAACAT | NM_001000    | RPL39        | ribosomal protein L39 (RPL39), mRNA                                             | -0.93         | 0.63        | -0.19        | 0.70       | -0.75           | 0.24    |
| Hs_12plexchip_2_10719 | v2HS_21538  | TTACAACAACAATATGATGAG  | NG_000974    | RPL7AL3      | RIBOSOMAL PROTEIN L7A-LIKE 3                                                    | -0.74         | 0.43        | 0.40         | 0.70       | -1.14           | 0.09    |
| Hs_12plexchip_4_1574  | v2HS_209659 | TTACACACCAGAATAACAGCA  | NM_183005    | RPP38        | ribonuclease P/MRP 38kDa subunit (RPP38), transcript variant 1, mRNA            | -1.11         | 0.69        | -0.02        | 0.78       | -1.09           | 0.14    |
| Hs_12plexchip_5_9679  | v2HS_269619 | ATTGAAATACTCTCAATGAC   | NM_001016    | RPS12        | ribosomal protein S12 (RPS12), mRNA                                             | -0.93         | 0.18        | 0.38         | 0.10       | -1.31           | 0.00    |
| Hs_12plexchip_6_8991  | v2HS_56919  | ATGTGTAGGGCGGTGATACCCA | NM_001025071 | RPS14        | ribosomal protein S14 (RPS14), transcript variant 1, mRNA                       | -0.95         | 0.43        | -0.23        | 0.53       | -0.72           | 0.14    |
| Hs_12plexchip_3_7841  | v2HS_232330 | AATTCGCTTCATCAGATGCGTG | NM_001021    | RPS17        | ribosomal protein S17 (RPS17), mRNA                                             | -1.98         | 0.96        | -1.13        | 0.68       | -0.85           | 0.29    |
| Hs_12plexchip_6_8655  | v2HS_267525 | ATCTCTTTGTCCTGAGGTGTC  | NM_001022    | RPS19        | ribosomal protein S19 (RPS19), mRNA                                             | -1.15         | 1.09        | 0.17         | 0.68       | -1.32           | 0.16    |
| Hs_12plexchip_3_6982  | v2HS_93855  | TTGATAAGTCCTTACTAAGGA  | NM_001028    | RPS25        | ribosomal protein S25 (RPS25), mRNA                                             | -0.84         | 0.79        | 0.22         | 1.17       | -1.05           | 0.27    |
| Hs_12plexchip_5_1217  | v2HS_69321  | ATAAGCCAAACAGTGCATCT   | NM_005444    | RQCD1        | RCD1 required for cell differentiation1 homolog (S. pombe) (RQCD1), mRNA        | -1.95         | 0.39        | -0.07        | 0.57       | -1.88           | 0.01    |
| Hs_12plexchip_5_6742  | v2HS_242012 | ATTGGCTATGGGTACCAAGGG  | NM_001003699 | RREB1        | ras responsive element binding protein 1 (RREB1), transcript variant 1, mRNA    | -0.95         | 0.35        | -0.11        | 0.14       | -0.84           | 0.04    |
| Hs_12plexchip_3_7921  | v2HS_93881  | TAATTGTAAGAGAAATCTCGGT | NM_001033    | RRM1         | ribonucleotide reductase M1 polypeptide (RRM1), mRNA                            | -2.17         | 0.14        | -1.26        | 0.39       | -0.91           | 0.04    |
| Hs_12plexchip_6_987   | v2HS_93885  | TAAATAGTTTCAAAGATCTGCT | NM_001033    | RRM1         | ribonucleotide reductase M1 polypeptide (RRM1), mRNA                            | -2.65         | 1.21        | -0.51        | 2.43       | -2.14           | 0.27    |
| Hs_12plexchip_5_6170  | v2HS_267976 | ATTGGAAGATGACAAACCGGC  | NM_015713    | RRM2B        | ribonucleotide reductase M2 B (TP53 inducible) (RRM2B), mRNA                    | -1.27         | 0.35        | -0.31        | 0.93       | -0.96           | 0.21    |
| Hs_12plexchip_5_12841 | v2HS_37141  | AAGGAGGATAAGAGTGTACGGA | NM_004704    | RRP9         | RRP9, small subunit (SSU) processome component, homolog (yeast) (RRP9), mRNA    | -2.38         | 0.32        | -0.45        | 1.07       | -1.93           | 0.08    |
| Hs_12plexchip_2_1533  | v2HS_87171  | TTAAATCCTCAAATAAGTTCTT | NM_015169    | RRS1         | RRS1 ribosome biogenesis regulator homolog (S. cerevisiae) (RRS1), mRNA         | -2.19         | 1.36        | -0.93        | 0.55       | -1.26           | 0.25    |
| Hs_12plexchip_4_10907 | v2HS_87174  | TAAGTCTTAATCTCAAAGTC   | NM_015169    | RRS1         | RRS1 ribosome biogenesis regulator homolog (S. cerevisiae) (RRS1), mRNA         | -2.08         | 0.37        | -0.33        | 0.14       | -1.75           | 0.01    |
| Hs_12plexchip_4_11123 | v2HS_175228 | TTTAAGCCTTATATGCCAGGCT | NM_018364    | RSBN1        | round spermatid basic protein 1 (RSBN1), mRNA                                   | -1.52         | 0.56        | 0.13         | 0.34       | -1.65           | 0.02    |
| Hs_12plexchip_5_2823  | v2HS_212690 | TTTGTGATGATCTCTGGGCC   | NM_014433    | RTDR1        | rhabdoid tumor deletion region gene 1 (RTDR1), mRNA                             | -1.74         | 0.60        | -0.74        | 0.77       | -1.00           | 0.16    |
| Hs_12plexchip_5_6636  | v2HS_262563 | AACACAATCTGGATAATGTCGG | NM_032957    | RTEL1        | regulator of telomere elongation helicase 1 (RTEL1), transcript variant 2, mRNA | -1.08         | 0.40        | -0.21        | 0.37       | -0.86           | 0.05    |
| Hs0P00000698          | v2HS_56938  | TTCGGCTTTGGCTTTGGATCCG | NM_206900    | RTN2         | reticulon 2 (RTN2), transcript variant 2, mRNA                                  | -1.84         | 0.83        | -0.18        | 0.83       | -1.66           | 0.07    |
| Hs_12plexchip_3_8348  | v2HS_100563 | AACAGGTAGAGGATGGTGAGCC | NM_178570    | RTN4RL2      | reticulon 4 receptor-like 2 (RTN4RL2), mRNA                                     | -2.44         | 0.63        | -1.51        | 0.59       | -0.93           | 0.13    |
| Hs_12plexchip_4_12701 | v2HS_30012  | ATCAGGAATTGGATCAGTAGGC | M15971       | RVNP2        | RETROVIRAL SEQUENCES NP2                                                        | -1.38         | 0.74        | -0.63        | 0.41       | -0.75           | 0.22    |
| Hs_12plexchip_4_12621 | v2HS_239475 | TTGGACACCAACTCTGTAAGGA | X66225       | RXRG         | RETINOID X RECEPTOR GAMMA                                                       | -2.10         | 0.50        | -0.85        | 1.10       | -1.25           | 0.18    |
| Hs_12plexchip_4_869   | v2HS_94832  | ATGTGTTAAACCAGAGATCCGG | NM_006917    | RXRG         | retinoid X receptor, gamma (RXRG), transcript variant 1, mRNA                   | -0.70         | 0.66        | 0.17         | 0.70       | -0.87           | 0.19    |
| Hs_12plexchip_5_7107  | v2HS_93897  | ATAATTCAGGACGCTCTCTGCT | NM_001035    | RYR2         | ryanodine receptor 2 (cardiac) (RYR2), mRNA                                     | -0.85         | 1.10        | 0.91         | 0.68       | -1.76           | 0.09    |
| Hs0P00004961          | v2HS_64402  | TTAACTATGACATCCCTGGAG  | NM_005500    | SAE1         | SUMO-1 ACTIVATING ENZYME SUBUNIT 1                                              | -1.68         | 0.14        | -0.44        | 0.22       | -1.25           | 0.00    |
| Hs_12plexchip_6_181   | v2HS_55515  | TTGAATGAAGTGTACTCCGGA  | NM_052837    | SCAMP3       | secretory carrier membrane protein 3 (SCAMP3), transcript variant 2, mRNA       | -2.11         | 0.65        | -1.08        | 1.08       | -1.04           | 0.24    |
| Hs0P00011554          | v2HS_26960  | TTCCCTGTGGAGGCGCAGAGGC | NM_145349    | SCARF1       | scavenger receptor class F, member 1 (SCARF1), transcript variant 2, mRNA       | -1.67         | 0.46        | -0.95        | 0.45       | -0.72           | 0.12    |

| Probe ID              | v2HS        | Sequence               | Accession    | Symbol    | Gene Name                                                                                                                       | Mut log2 mean | Mut log2 SD | WT log2 Mean | WT log2 SD | log2 difference | P-value |
|-----------------------|-------------|------------------------|--------------|-----------|---------------------------------------------------------------------------------------------------------------------------------|---------------|-------------|--------------|------------|-----------------|---------|
| Hs_12plexchip_5_10669 | v2HS_97596  | ATATTCAATGTAGTTGCCTCCT | NM_182835    | SCFD1     | sec1 family domain containing 1 (SCFD1), transcript variant 2, mRNA                                                             | -2.14         | 0.89        | -0.96        | 0.86       | -1.19           | 0.17    |
| Hs_12plexchip_5_497   | v2HS_50441  | ATATATATGAGAAGGATCAGCA | NM_152540    | SCFD2     | sec1 family domain containing 2 (SCFD2), mRNA                                                                                   | -1.08         | 0.21        | 0.42         | 1.10       | -1.50           | 0.14    |
| Hs_12plexchip_5_7041  | v2HS_261909 | TTAAGACATCTTTGTCTGGGCT | NM_000334    | SCN4A     | sodium channel, voltage-gated, type IV, alpha subunit (SCN4A), mRNA                                                             | -0.85         | 1.27        | 0.59         | 0.56       | -1.44           | 0.18    |
| Hs_12plexchip_5_6806  | v2HS_251693 | TATACTCTCCCAATCAAAGCC  | NM_014191    | SCN8A     | sodium channel, voltage gated, type VIII, alpha subunit (SCN8A), mRNA                                                           | -0.78         | 0.14        | 0.14         | 0.27       | -0.92           | 0.01    |
| Hs_12plexchip_5_4162  | v2HS_259547 | TTCCTCCAGTTGATTAATAGCT | NM_006642    | SDCCAG8   | serologically defined colon cancer antigen 8 (SDCCAG8), mRNA                                                                    | -1.21         | 0.40        | 0.09         | 0.74       | -1.30           | 0.07    |
| Hs_12plexchip_5_7265  | v2HS_265275 | TTGTGTAGTCTTTACTTCCC   | NM_183352    | SEC13     | SEC13 homolog (S. cerevisiae) (SEC13), mRNA                                                                                     | -3.50         | 0.06        | -1.20        | 0.39       | -2.30           | 0.01    |
| Hs_12plexchip_3_3370  | v2HS_41405  | ATTCCACTTGGTGTGATGAGCC | NM_174975    | SEC14L3   | SEC14-like 3 (S. cerevisiae) (SEC14L3), mRNA                                                                                    | -1.55         | 0.51        | -0.26        | 0.11       | -1.29           | 0.04    |
| Hs_12plexchip_5_9171  | v2HS_99249  | TTATGATTATCGAACTGAGCCA | NM_001013437 | SEH1L     | SEH1-like (S. cerevisiae) (SEH1L), transcript variant 1, mRNA                                                                   | -0.92         | 0.18        | 1.22         | 0.62       | -2.14           | 0.02    |
| Hs_12plexchip_6_5747  | v2HS_99250  | TTATATCCAACTCACTCGCCA  | NM_001013437 | SEH1L     | SEH1-like (S. cerevisiae) (SEH1L), transcript variant 1, mRNA                                                                   | -2.69         | 0.30        | -1.83        | 0.81       | -0.86           | 0.20    |
| Hs_12plexchip_4_4512  | v2HS_175639 | TTTCCTCTTGCATGCTGTCCC  | NM_203472    | SELS      | selenoprotein S (SELS), transcript variant 1, mRNA                                                                              | -2.03         | 0.90        | -0.99        | 0.49       | -1.04           | 0.18    |
| Hs_12plexchip_6_10273 | v2HS_28047  | GCATCAAATACACATAGAGCT  | NM_004263    | SEMA4F    | sema domain, immunoglobulin domain (Ig), transmembrane domain (TM) and short cytoplasmic domain, (semaphorin) 4F (SEMA4F), mRNA | -1.39         | 0.52        | -0.28        | 1.08       | -1.11           | 0.21    |
| Hs_12plexchip_6_1170  | v2HS_27976  | ATTTAGAGTGGAACAATGGCGT | NM_003612    | SEMA7A    | semaphorin 7A, GPI membrane anchor (John Milton Hagen blood group) (SEMA7A), mRNA                                               | -0.77         | 0.87        | 0.08         | 0.57       | -0.85           | 0.24    |
| Hs_12plexchip_5_3489  | v2HS_254654 | TTTGAGGTAACAATAGTGCCG  | NM_152699    | SENP5     | SUMO1/sentrin specific peptidase 5 (SENP5), mRNA                                                                                | -1.74         | 0.73        | -0.80        | 0.31       | -0.95           | 0.14    |
| Hs_12plexchip_5_10377 | v2HS_99499  | ATGAGGGTGGATTTCCCTAGGC | NM_052838    | SEPT1     | septin 1 (SEPT1), mRNA                                                                                                          | -0.83         | 0.40        | 0.84         | 1.37       | -1.67           | 0.16    |
| Hs_12plexchip_5_10753 | v2HS_145332 | AAGTAAAGACACACGTGGACGC | NM_207366    | SEPT14    | septin 14 (SEPT14), mRNA                                                                                                        | -2.03         | 1.22        | -0.31        | 0.77       | -1.73           | 0.12    |
| HsOP00003291          | v2HS_47661  | TTATTTCTCTGAGTCTCTGGG  | NM_080415    | SEPT4     | septin 4 (SEPT4), transcript variant 2, mRNA                                                                                    | -1.08         | 0.20        | -0.11        | 0.33       | -0.97           | 0.02    |
| Hs_12plexchip_4_10911 | v2HS_200669 | ATTCAGTTGTTCTCCATTCT   | NM_020755    | SERINC1   | serine incorporator 1 (SERINC1), mRNA                                                                                           | -1.48         | 1.21        | -0.31        | 0.71       | -1.17           | 0.24    |
| Hs_12plexchip_2_11081 | v2HS_43826  | GGAAATCAACACTTTCAATCGT | NM_080474    | SERPINB12 | serpin peptidase inhibitor, clade B (ovalbumin), member 12 (SERPINB12), mRNA                                                    | -1.14         | 0.38        | -0.39        | 0.76       | -0.75           | 0.23    |
| Hs_12plexchip_6_3896  | v2HS_169968 | AATTGAGTTGTGATCTGACCT  | NM_002639    | SERPINB5  | serpin peptidase inhibitor, clade B (ovalbumin), member 5 (SERPINB5), mRNA                                                      | -1.48         | 0.60        | -0.13        | 0.59       | -1.35           | 0.05    |
| HsOP00004057          | v2HS_198275 | ATATCTGTACTTGGGTGTCT   | NM_005877    | SF3A1     | SPLICING FACTOR 3A, SUBUNIT 1, 120KDA                                                                                           | -1.78         | 0.50        | -0.80        | 0.41       | -0.98           | 0.06    |
| Hs_12plexchip_3_7330  | v2HS_97294  | TATATCATACATTTCTCAGCT  | NM_016047    | SF3B14    | splicing factor 3B, 14 kDa subunit (SF3B14), mRNA                                                                               | -2.92         | 0.67        | -1.96        | 0.85       | -0.96           | 0.20    |
| Hs_12plexchip_4_10244 | v2HS_97296  | ATATGTATCAAAGTTTCAAGCA | NM_016047    | SF3B14    | splicing factor 3B, 14 kDa subunit (SF3B14), mRNA                                                                               | -3.56         | 1.84        | -1.76        | 0.87       | -1.80           | 0.23    |
| Hs_12plexchip_5_12865 | v2HS_240572 | ATAGGGCTTGAGATTTGTTGGT | NM_005066    | SFPQ      | splicing factor proline/glutamine-rich (polypyrimidine tract binding protein associated) (SFPQ), mRNA                           | -0.99         | 0.83        | -0.12        | 0.84       | -0.87           | 0.27    |
| Hs_12plexchip_4_365   | v2HS_202018 | TTATCTACACCAATACATTGGA | NM_001078166 | SFRS1     | splicing factor, arginine/serine-rich 1 (splicing factor 2, alternate splicing factor) (SFRS1), transcript variant 2, mRNA      | -1.13         | 0.38        | -0.24        | 0.20       | -0.89           | 0.04    |
| Hs_12plexchip_4_9652  | v2HS_23708  | ATCAGATCTTCTGTAGGAGGC  | NM_003769    | SFRS9     | splicing factor, arginine/serine-rich 9 (SFRS9), mRNA                                                                           | -0.87         | 1.25        | 1.18         | 1.24       | -2.05           | 0.11    |
| Hs_12plexchip_5_8825  | v2HS_225440 | TTGGTGTAAACCTAATGGGCT  | NM_178858    | SFXN2     | sideroflexin 2 (SFXN2), mRNA                                                                                                    | -0.90         | 0.21        | 0.53         | 0.24       | -1.43           | 0.00    |
| Hs_12plexchip_4_495   | v2HS_202269 | ATAAGACTCAATGTCCAGTCCT | NM_024776    | SGK269    | NKF3 kinase family member (SGK269), mRNA                                                                                        | -1.72         | 0.12        | -0.54        | 0.74       | -1.18           | 0.11    |
| Hs_12plexchip_4_7273  | v2HS_53458  | ATATACAAAGGAACATGGTGGT | NM_147156    | SGMS1     | sphingomyelin synthase 1 (SGMS1), mRNA                                                                                          | -0.74         | 0.47        | 0.02         | 0.39       | -0.76           | 0.10    |
| Hs_12plexchip_6_8658  | v2HS_68216  | TACCAATGACAGGTGAAGGCGC | NM_005490    | SH2D3A    | SH2 domain containing 3A (SH2D3A), mRNA                                                                                         | -1.30         | 0.52        | 0.02         | 0.85       | -1.32           | 0.10    |
| Hs_12plexchip_3_8888  | v2HS_230983 | ATAATCATAGAGAACCCTGGCC | NM_016009    | SH3GLB1   | SH3-domain GRB2-like endophilin B1 (SH3GLB1), mRNA                                                                              | -1.51         | 0.28        | -0.58        | 0.76       | -0.92           | 0.16    |
| Hs_12plexchip_5_11115 | v2HS_141439 | TTCATCAATTGGTATCAGGCGT | NM_001017995 | SH3PXD2B  | SH3 and PX domains 2B (SH3PXD2B), mRNA                                                                                          | -1.38         | 0.13        | 0.75         | 0.19       | -2.13           | 0.00    |
| Hs_12plexchip_3_11364 | v2HS_136410 | ATAGGAAGAGACATCCCTTGGG | NM_024577    | SH3TC2    | SH3 domain and tetratricopeptide repeats 2 (SH3TC2), mRNA                                                                       | -1.26         | 0.24        | -0.45        | 0.09       | -0.81           | 0.02    |

| Probe ID              | v2HS        | Sequence                | Accession    | Symbol   | Gene Name                                                                                                                                     | Mut log2 mean | Mut log2 SD | WT log2 Mean | WT log2 SD | log2 difference | P-value |
|-----------------------|-------------|-------------------------|--------------|----------|-----------------------------------------------------------------------------------------------------------------------------------------------|---------------|-------------|--------------|------------|-----------------|---------|
| Hs_12plexchip_3_12275 | v2HS_32047  | TACATTCATCACAGTTGCTGGG  | NM_001010846 | SHE      | Src homology 2 domain containing E (SHE), mRNA                                                                                                | -1.93         | 0.46        | -0.97        | 0.79       | -0.96           | 0.16    |
| HsOP00010492          | v2HS_33286  | ATTATCTCCAGACATGTGCA    | NM_006304    | SHFM1    | split hand/foot malformation (ectrodactyly) type 1 (SHFM1), mRNA                                                                              | -1.61         | 0.21        | -0.46        | 0.48       | -1.15           | 0.04    |
| Hs_12plexchip_5_3317  | v2HS_195697 | TTTCTCATCCAGCATTGGCCCC  | NM_138392    | SHKBP1   | SH3KBP1 binding protein 1 (SHKBP1), mRNA                                                                                                      | -2.85         | 0.90        | -1.05        | 1.04       | -1.80           | 0.09    |
| Hs_12plexchip_3_1044  | v2HS_41530  | ATTCTCTGGCATTCTCTCGG    | NM_080792    | SIRPA    | signal-regulatory protein alpha (SIRPA), transcript variant 3, mRNA                                                                           | -0.91         | 0.55        | 0.62         | 0.33       | -1.53           | 0.02    |
| Hs_12plexchip_4_4718  | v2HS_202737 | ATACAATTGACTTGCTGCTGCA  | NM_170679    | SKP1     | S-phase kinase-associated protein 1 (SKP1), transcript variant 2, mRNA                                                                        | -2.85         | 0.46        | -1.38        | 1.33       | -1.47           | 0.19    |
| Hs_12plexchip_3_6246  | v2HS_111725 | TTAGAGATGCTTACCGTATGCC  | NM_000617    | SLC11A2  | solute carrier family 11 (proton-coupled divalent metal ion transporters), member 2 (SLC11A2), mRNA                                           | -1.76         | 0.47        | -0.61        | 0.60       | -1.15           | 0.06    |
| Hs_12plexchip_3_11403 | v2HS_238406 | TTAAGCATAGAGGACACTTGGC  | NM_016582    | SLC15A3  | solute carrier family 15, member 3 (SLC15A3), mRNA                                                                                            | -1.35         | 0.33        | -0.38        | 0.29       | -0.98           | 0.02    |
| Hs_12plexchip_6_1259  | v2HS_243817 | TTTCTGAAAGGAGATGGGAGCT  | NM_020309    | SLC17A7  | solute carrier family 17 (sodium-dependent inorganic phosphate cotransporter), member 7 (SLC17A7), mRNA                                       | -0.90         | 0.37        | 0.06         | 0.57       | -0.97           | 0.08    |
| Hs_12plexchip_3_7924  | v2HS_231081 | TTGGGAATGAAATCTGTCACCG  | NM_021977    | SLC22A3  | solute carrier family 22 (extraneuronal monoamine transporter), member 3 (SLC22A3), mRNA                                                      | -0.83         | 0.32        | 0.26         | 0.15       | -1.09           | 0.01    |
| Hs_12plexchip_5_2605  | v2HS_253085 | TAGATGACAAACTATGGCCA    | NM_005984    | SLC25A1  | solute carrier family 25 (mitochondrial carrier; citrate transporter), member 1 (SLC25A1), mRNA                                               | -1.65         | 0.09        | -0.65        | 0.28       | -0.99           | 0.02    |
| Hs_12plexchip_4_962   | v2HS_201867 | TTAACATCAAATGGACAGGGCC  | NM_031947    | SLC25A2  | solute carrier family 25 (mitochondrial carrier; ornithine transporter) member 2 (SLC25A2), nuclear gene encoding mitochondrial protein, mRNA | -0.97         | 0.47        | 0.01         | 0.37       | -0.98           | 0.05    |
| Hs_12plexchip_5_6278  | v2HS_160463 | TAGAATTATAACCATCTTGCCCT | NM_173471    | SLC25A26 | solute carrier family 25, member 26 (SLC25A26), mRNA                                                                                          | -0.93         | 0.12        | 0.09         | 0.79       | -1.02           | 0.15    |
| Hs_12plexchip_3_8816  | v2HS_99234  | ATAGGTCATGAAGTGAATGGCT  | NM_031212    | SLC25A28 | solute carrier family 25, member 28 (SLC25A28), mRNA                                                                                          | -1.28         | 0.72        | -0.36        | 0.23       | -0.92           | 0.15    |
| Hs_12plexchip_5_8328  | v2HS_266973 | TAAATATCCGTGTCTGGCACCT  | NM_001040454 | SLC26A6  | solute carrier family 26, member 6 (SLC26A6), transcript variant 4, mRNA                                                                      | -1.40         | 0.80        | -0.26        | 0.39       | -1.14           | 0.12    |
| Hs_12plexchip_3_8966  | v2HS_92464  | ATTGAGTATGAGATTGTGGGCA  | NM_000340    | SLC2A2   | solute carrier family 2 (facilitated glucose transporter), member 2 (SLC2A2), mRNA                                                            | -2.49         | 0.45        | -1.54        | 0.57       | -0.95           | 0.09    |
| Hs_12plexchip_6_3900  | v2HS_172347 | ATGGTAAGTGAGCGTAAGGGCC  | NM_003459    | SLC30A3  | solute carrier family 30 (zinc transporter), member 3 (SLC30A3), mRNA                                                                         | -1.01         | 0.93        | 0.29         | 0.28       | -1.30           | 0.13    |
| Hs_12plexchip_6_2538  | v2HS_234764 | ATAGTTGGCACAAGGATGACCA  | NM_018018    | SLC38A4  | solute carrier family 38, member 4 (SLC38A4), mRNA                                                                                            | -0.71         | 1.84        | 0.88         | 0.84       | -1.59           | 0.27    |
| Hs_12plexchip_2_5062  | v2HS_177602 | AATGTAGAGAAATGCCTCAGGC  | NM_032803    | SLC7A3   | solute carrier family 7 (cationic amino acid transporter, y+ system), member 3 (SLC7A3), transcript variant 1, mRNA                           | -1.24         | 0.92        | -0.18        | 0.29       | -1.06           | 0.17    |
| Hs_12plexchip_6_3523  | v2HS_172487 | TTGAGGGATGAGATTGCTACCA  | NM_003486    | SLC7A5   | solute carrier family 7 (cationic amino acid transporter, y+ system), member 5 (SLC7A5), mRNA                                                 | -2.17         | 0.74        | -1.12        | 0.54       | -1.05           | 0.13    |
| Hs_12plexchip_3_11150 | v2HS_238776 | TTCAGGATGAGCACTTTGAGCT  | NM_032539    | SLITRK2  | SLIT and NTRK-like family, member 2 (SLITRK2), mRNA                                                                                           | -1.58         | 0.39        | 0.16         | 0.78       | -1.74           | 0.04    |
| Hs_12plexchip_2_12060 | v2HS_216620 | TTGGAGAATTAGCCTGTTCCAC  | NM_006425    | SLU7     | SLU7 splicing factor homolog (S. cerevisiae) (SLU7), mRNA                                                                                     | -1.22         | 0.64        | -0.31        | 0.25       | -0.91           | 0.12    |
| Hs_12plexchip_5_2833  | v2HS_250915 | ATCTCATTATAATACTACTCT   | NM_006425    | SLU7     | SLU7 splicing factor homolog (S. cerevisiae) (SLU7), mRNA                                                                                     | -1.15         | 0.41        | -0.21        | 0.53       | -0.94           | 0.08    |
| Hs_12plexchip_4_610   | v2HS_68088  | TTTCAACTTAATACTAAGTGCA  | NM_001002800 | SMC4     | structural maintenance of chromosomes 4 (SMC4), transcript variant 2, mRNA                                                                    | -1.54         | 0.38        | -0.74        | 0.07       | -0.81           | 0.06    |
| Hs_12plexchip_4_7961  | v2HS_92490  | ATTAGCTACTTACAGATTGGG   | NM_000344    | SMN1     | survival of motor neuron 1, telomeric (SMN1), transcript variant d, mRNA                                                                      | -1.38         | 1.10        | -0.42        | 0.22       | -0.97           | 0.26    |
| Hs_12plexchip_5_3234  | v2HS_98265  | AATTTCTATGTCGTTGTGACCT  | NM_022739    | SMURF2   | SMAD specific E3 ubiquitin protein ligase 2 (SMURF2), mRNA                                                                                    | -1.01         | 1.06        | 0.26         | 1.45       | -1.27           | 0.29    |
| Hs_12plexchip_4_9947  | v2HS_16985  | TAAATGATAAAGAAGACAGCA   | NM_130798    | SNAP23   | synaptosomal-associated protein, 23kDa (SNAP23), transcript variant 2, mRNA                                                                   | -1.12         | 0.08        | 0.24         | 0.43       | -1.36           | 0.03    |
| Hs_12plexchip_6_8448  | v2HS_153275 | TTCTTGTGAAATGCAGCCGT    | NM_003093    | SNRPC    | small nuclear ribonucleoprotein polypeptide C (SNRPC), mRNA                                                                                   | -2.23         | 1.47        | 0.02         | 2.47       | -2.26           | 0.26    |



| Probe ID              | v2HS        | Sequence               | Accession    | Symbol     | Gene Name                                                                                                                       | Mut log2 mean | Mut log2 SD | WT log2 Mean | WT log2 SD | log2 difference | P-value |
|-----------------------|-------------|------------------------|--------------|------------|---------------------------------------------------------------------------------------------------------------------------------|---------------|-------------|--------------|------------|-----------------|---------|
| Hs_12plexchip_6_1666  | v2HS_228001 | TAGAAACAATGCAAGCTGGGCA | NM_022808    | SNRPN      | small nuclear ribonucleoprotein polypeptide N (SNRPN), transcript variant 5, mRNA                                               | -1.79         | 0.89        | 0.25         | 0.45       | -2.05           | 0.04    |
| Hs_12plexchip_6_10461 | v2HS_84743  | TTTGAGAGGGATGATCTTCCTG | NM_006750    | SNTB2      | syntrophin, beta 2 (dystrophin-associated protein A1, 59kDa, basic component 2) (SNTB2), mRNA                                   | -1.15         | 0.40        | -0.34        | 0.15       | -0.81           | 0.06    |
| Hs_12plexchip_5_12441 | v2HS_252521 | TAGAATCGGAAATCAGTCTGGC | NM_001042588 | SNUPN      | snurportin 1 (SNUPN), transcript variant 3, mRNA                                                                                | -2.21         | 1.65        | -0.43        | 1.18       | -1.78           | 0.21    |
| Hs_12plexchip_4_9555  | v2HS_19895  | TTTACTGGGCTATAAATACTC  | NM_012245    | SNW1       | SNW domain containing 1 (SNW1), mRNA                                                                                            | -1.38         | 0.33        | 0.46         | 0.22       | -1.84           | 0.00    |
| Hs_12plexchip_6_1153  | v2HS_247594 | TAAGGCAAACCTTGTAATTGCT | NM_013322    | SNX10      | sorting nexin 10 (SNX10), mRNA                                                                                                  | -1.15         | 0.47        | -0.15        | 0.87       | -1.00           | 0.18    |
| Hs_12plexchip_4_12266 | v2HS_153307 | TTTCTTCAAACCATGCATCCGA | NM_003100    | SNX2       | sorting nexin 2 (SNX2), mRNA                                                                                                    | -1.22         | 0.18        | -0.02        | 0.52       | -1.20           | 0.05    |
| Hs_12plexchip_4_9656  | v2HS_53158  | GTATAGCATGATATTCTTGCT  | NM_003877    | SOCS2      | suppressor of cytokine signaling 2 (SOCS2), mRNA                                                                                | -0.83         | 0.71        | 0.38         | 0.95       | -1.21           | 0.16    |
| Hs_12plexchip_6_10325 | v2HS_153362 | ATAGGTTGGCCTACAATTGCA  | NM_003112    | SP4        | Sp4 transcription factor (SP4), mRNA                                                                                            | -1.52         | 1.52        | 0.13         | 0.44       | -1.65           | 0.20    |
| Hs_12plexchip_4_157   | v2HS_96222  | TTTAGTTCCTCGGATAGGCCCA | NM_199436    | SPAST      | spastin (SPAST), transcript variant 2, mRNA                                                                                     | -1.87         | 0.20        | 0.32         | 1.06       | -2.20           | 0.07    |
| Hs_12plexchip_5_3220  | v2HS_210161 | TAAATGCCTGATATATGCCGA  | NM_138796    | SPATA17    | spermatogenesis associated 17 (SPATA17), mRNA                                                                                   | -1.82         | 0.50        | -0.23        | 0.67       | -1.59           | 0.03    |
| Hs_12plexchip_5_10248 | v2HS_101426 | TTTGAAATGGATCTGACCACGG | AK075287     | SPBC24     | SPINDLE POLE BODY COMPONENT 24 HOMOLOG (S. CEREVISIAE)                                                                          | -4.22         | 1.52        | -1.85        | 1.56       | -2.36           | 0.13    |
| Hs_12plexchip_5_967   | v2HS_65137  | TTATTGTGTAACCTGACAGCCC | NM_001033554 | SPECC1     | sperm antigen with calponin homology and coiled-coil domains 1 (SPECC1), transcript variant NSP5alpha3alpha, mRNA               | -0.94         | 0.21        | -0.22        | 0.81       | -0.72           | 0.26    |
| Hs_12plexchip_4_653   | v2HS_200998 | TAATGGTTCAAGGAAGCTGCCA | NM_021972    | SPHK1      | sphingosine kinase 1 (SPHK1), transcript variant 1, mRNA                                                                        | -1.00         | 0.48        | -0.17        | 0.30       | -0.83           | 0.07    |
| Hs_12plexchip_3_2439  | v2HS_66993  | TACTGAGAGCAGTTGGCGTTC  | NM_021114    | SPINK2     | serine peptidase inhibitor, Kazal type 2 (acrosin-trypsin inhibitor) (SPINK2), mRNA                                             | -0.87         | 0.81        | 0.92         | 2.24       | -1.80           | 0.30    |
| Hs_12plexchip_3_3362  | v2HS_51341  | TTCTCATAGAAGGTGCACTTCC | NM_001077238 | SPPL2B     | signal peptide peptidase-like 2B (SPPL2B), transcript variant 3, mRNA                                                           | -1.10         | 0.36        | -0.27        | 0.72       | -0.82           | 0.18    |
| Hs_12plexchip_4_9926  | v2HS_197602 | ATAGTCAATCACGTTCTGGGCC | NM_005842    | SPRY2      | sprouty homolog 2 (Drosophila) (SPRY2), mRNA                                                                                    | -1.29         | 1.18        | -0.32        | 0.38       | -0.97           | 0.29    |
| Hs_12plexchip_3_10829 | v2HS_234466 | TAAGGAAACTCTCCCGAGGGC  | NM_016642    | SPTBN5     | spectrin, beta, non-erythrocytic 5 (SPTBN5), mRNA                                                                               | -1.04         | 0.42        | 0.14         | 0.37       | -1.17           | 0.02    |
| Hs_12plexchip_5_1865  | v2HS_213472 | TTTGCTTTCAACTTTGGGAGGT | NM_194285    | SPTY2D1    | SPT2, Suppressor of Ty, domain containing 1 (S. cerevisiae) (SPTY2D1), mRNA                                                     | -1.05         | 0.46        | 0.03         | 0.31       | -1.08           | 0.03    |
| Hs_12plexchip_3_2641  | v2HS_65728  | TATCGGTAGGAGATCTTCTCGT | NM_021199    | SQRDL      | sulfide quinone reductase-like (yeast) (SQRDL), mRNA                                                                            | -0.72         | 0.63        | 0.00         | 0.13       | -0.72           | 0.18    |
| Hs_12plexchip_3_447   | v2HS_47985  | TTGTTCTTCAAATGGAGGGCA  | NM_003900    | SQSTM1     | sequestosome 1 (SQSTM1), mRNA                                                                                                   | -1.25         | 0.60        | -0.54        | 0.66       | -0.71           | 0.24    |
| Hs_12plexchip_6_9192  | v2HS_269798 | ATATTGATAACAGGTACAGGCT | NM_001047    | SRD5A1     | steroid-5-alpha-reductase, alpha polypeptide 1 (3-oxo-5 alpha-steroid delta 4-dehydrogenase alpha 1) (SRD5A1), mRNA             | -0.77         | 0.66        | 0.53         | 0.56       | -1.30           | 0.06    |
| Hs_12plexchip_3_10491 | v2HS_136503 | ATATCTTCAGATACTTTCTGCT | NM_024592    | SRD5A3     | steroid 5 alpha-reductase 3 (SRD5A3), mRNA                                                                                      | -1.38         | 0.19        | -0.49        | 0.51       | -0.89           | 0.08    |
| Hs_12plexchip_3_3437  | v2HS_47125  | TTCAACAAGGACTCTATAGTCT | NM_004599    | SREBF2     | sterol regulatory element binding transcription factor 2 (SREBF2), mRNA                                                         | -1.02         | 0.30        | -0.09        | 0.62       | -0.92           | 0.11    |
| Hs_12plexchip_3_3045  | v2HS_58606  | ATGTTGGCTGACTTGATGACCT | NM_080823    | SRMS       | src-related kinase lacking C-terminal regulatory tyrosine and N-terminal myristylation sites (SRMS), mRNA                       | -1.63         | 0.94        | -0.87        | 0.27       | -0.76           | 0.29    |
| Hs_12plexchip_2_7909  | v2HS_153496 | TTTAGCATAGCATTCAATACCT | NM_003136    | SRP54      | signal recognition particle 54kDa (SRP54), mRNA                                                                                 | -0.77         | 0.63        | 0.08         | 0.51       | -0.85           | 0.15    |
| Hs_12plexchip_4_519   | v2HS_197188 | ATCAATGAGCTGGACAATGGTC | NM_014370    | SRPK3      | SFRS protein kinase 3 (SRPK3), mRNA                                                                                             | -0.89         | 0.43        | -0.14        | 0.75       | -0.75           | 0.22    |
| Hs_12plexchip_2_3607  | v2HS_73263  | ATGACAAACCAAGGCTCTTCAT | NM_021947    | SRR        | serine racemase (SRR), mRNA                                                                                                     | -1.99         | 0.85        | -0.79        | 0.83       | -1.20           | 0.15    |
| Hs_12plexchip_5_840   | v2HS_65291  | ATTGAACTGGAGAACTGAGGC  | NM_080725    | SRXN1      | sulfiredoxin 1 homolog (S. cerevisiae) (SRXN1), mRNA                                                                            | -0.84         | 0.65        | 0.39         | 0.50       | -1.23           | 0.06    |
| Hs_12plexchip_5_12632 | v2HS_214513 | TTTGATACAAAATCCATGCC   | NM_007107    | SSR3       | signal sequence receptor, gamma (translocon-associated protein gamma) (SSR3), mRNA                                              | -1.12         | 0.25        | -0.23        | 0.53       | -0.88           | 0.09    |
| Hs_12plexchip_4_835   | v2HS_137870 | AATCATGTCCATAGTTTCAGCC | NM_030965    | ST6GALNAC5 | ST6 (alpha-N-acetylneuraminyl-2,3-beta-galactosyl-1,3)-N-acetylgalactosaminide alpha-2,6-sialyltransferase 5 (ST6GALNAC5), mRNA | -0.85         | 0.66        | 0.43         | 0.34       | -1.28           | 0.06    |
| Hs_12plexchip_4_10510 | v2HS_175479 | ATAGTAAGTAAGAGGCTCTCGT | NM_021908    | ST7        | suppression of tumorigenicity 7 (ST7), transcript variant b, mRNA                                                               | -0.78         | 0.24        | 0.23         | 0.69       | -1.01           | 0.11    |
| Hs_12plexchip_3_3929  | v2HS_40842  | ATCTGGAAAGGCACTGAGGTTC | NM_015879    | ST8SIA3    | ST8 alpha-N-acetylneuraminide alpha-2,8-sialyltransferase 3 (ST8SIA3), mRNA                                                     | -0.98         | 0.48        | 0.00         | 0.18       | -0.98           | 0.06    |

| Probe ID              | v2HS        | Sequence                | Accession    | Symbol   | Gene Name                                                                                                              | Mut log2 mean | Mut log2 SD | WT log2 Mean | WT log2 SD | log2 difference | P-value |
|-----------------------|-------------|-------------------------|--------------|----------|------------------------------------------------------------------------------------------------------------------------|---------------|-------------|--------------|------------|-----------------|---------|
| Hs_12plexchip_5_9855  | v2HS_92520  | TTTCCGATCTTCTGACGACCT   | NM_000349    | STAR     | steroidogenic acute regulatory protein (STAR), nuclear gene encoding mitochondrial protein, transcript variant 1, mRNA | -0.70         | 0.28        | 0.04         | 0.05       | -0.73           | 0.04    |
| Hs_12plexchip_2_5453  | v2HS_182540 | ATTTATTACGGTTATCTTCGCT  | NM_006645    | STARD10  | StAR-related lipid transfer (START) domain containing 10 (STARD10), mRNA                                               | -0.76         | 0.57        | 0.30         | 0.82       | -1.06           | 0.15    |
| Hs0P00001673          | v2HS_63989  | TTCATATTTCTCTCGTAGCGCT  | NM_139171    | STARD6   | StAR-related lipid transfer (START) domain containing 6 (STARD6), mRNA                                                 | -0.70         | 0.29        | 0.09         | 0.50       | -0.78           | 0.09    |
| Hs_12plexchip_4_1657  | v2HS_51744  | TTAATCTCCATATTCTTGCT    | NM_020151    | STARD7   | StAR-related lipid transfer (START) domain containing 7 (STARD7), mRNA                                                 | -2.05         | 0.34        | -0.67        | 1.17       | -1.38           | 0.17    |
| Hs_12plexchip_5_12291 | v2HS_86641  | CATCTTCTGAGTAACAGCTGT   | NM_007315    | STAT1    | signal transducer and activator of transcription 1, 91kDa (STAT1), transcript variant alpha, mRNA                      | -0.83         | 0.11        | 0.09         | 0.35       | -0.93           | 0.03    |
| Hs_12plexchip_5_6109  | v2HS_257485 | TTTGGATACAGATACTTCAGGG  | NM_007315    | STAT1    | signal transducer and activator of transcription 1, 91kDa (STAT1), transcript variant alpha, mRNA                      | -0.86         | 0.78        | 1.14         | 0.67       | -2.00           | 0.03    |
| Hs_12plexchip_5_2673  | v2HS_207632 | TTAAGAGTCCAATTAGAAACAC  | NM_014393    | STAU2    | staufen, RNA binding protein, homolog 2 (Drosophila) (STAU2), mRNA                                                     | -1.10         | 0.06        | -0.17        | 0.08       | -0.93           | 0.00    |
| Hs_12plexchip_4_10862 | v2HS_200978 | TGAATGATCCACCTTGTCTCAT  | NM_030906    | STK33    | serine/threonine kinase 33 (STK33), mRNA                                                                               | -0.79         | 0.88        | 0.38         | 0.84       | -1.17           | 0.17    |
| Hs_12plexchip_3_12227 | v2HS_242448 | TTATTTGGAAGCTTCTGTGGT   | NM_145286    | STOML3   | stomatin (EPB72)-like 3 (STOML3), mRNA                                                                                 | -0.77         | 0.67        | -0.07        | 0.67       | -0.70           | 0.27    |
| Hs_12plexchip_5_11897 | v2HS_133518 | TTAGCATAAGAGGGATCCAGCA  | NM_152713    | STT3A    | STT3, subunit of the oligosaccharyltransferase complex, homolog A (S. cerevisiae) (STT3A), mRNA                        | -1.10         | 0.11        | 0.00         | 0.17       | -1.10           | 0.00    |
| Hs_12plexchip_5_9442  | v2HS_94011  | TTCTGGAGCCTCTTGGTCAGGC  | NM_001054    | SULT1A2  | sulfotransferase family, cytosolic, 1A, phenol-preferring, member 2 (SULT1A2), transcript variant 1, mRNA              | -0.80         | 0.19        | 0.19         | 1.10       | -0.99           | 0.26    |
| Hs_12plexchip_5_2336  | v2HS_207077 | TTTAGGAAGAAGATCAGTCGGT  | NM_014465    | SULT1B1  | sulfotransferase family, cytosolic, 1B, member 1 (SULT1B1), mRNA                                                       | -0.85         | 0.12        | -0.13        | 0.26       | -0.71           | 0.03    |
| Hs_12plexchip_6_8736  | v2HS_217410 | ATCATTATAAACCTCCGGCAG   | NM_014351    | SULT4A1  | sulfotransferase family 4A, member 1 (SULT4A1), mRNA                                                                   | -0.81         | 0.31        | 0.85         | 0.44       | -1.66           | 0.01    |
| Hs_12plexchip_5_2353  | v2HS_209161 | TTAGGGTTTCGAAATATCACCA  | NM_001032377 | SULT6B1  | sulfotransferase family, cytosolic, 6B, member 1 (SULT6B1), mRNA                                                       | -1.13         | 0.93        | -0.04        | 0.90       | -1.09           | 0.22    |
| Hs_12plexchip_5_7120  | v2HS_262274 | TTAAGTACACATATACTAAGCT  | NM_024670    | SUV39H2  | suppressor of variegation 3-9 homolog 2 (Drosophila) (SUV39H2), mRNA                                                   | -1.95         | 0.14        | 0.14         | 0.36       | -2.08           | 0.00    |
| Hs_12plexchip_3_8127  | v2HS_97193  | TATTGATAACAGGAGCAGGCGC  | NM_016028    | SUV420H1 | suppressor of variegation 4-20 homolog 1 (Drosophila) (SUV420H1), transcript variant 2, mRNA                           | -1.44         | 0.67        | -0.48        | 0.29       | -0.96           | 0.12    |
| Hs_12plexchip_5_4015  | v2HS_74301  | TAAGATAAAGTCATGCATGCT   | NM_015355    | SUZ12    | suppressor of zeste 12 homolog (Drosophila) (SUZ12), mRNA                                                              | -0.84         | 0.80        | 1.06         | 1.19       | -1.91           | 0.09    |
| Hs_12plexchip_3_11332 | v2HS_237459 | TTTAAGCATGGGTTTGACTGGC  | NM_153366    | SVEP1    | sushi, von Willebrand factor type A, EGF and pentraxin domain containing 1 (SVEP1), mRNA                               | -1.52         | 0.48        | -0.69        | 0.84       | -0.83           | 0.23    |
| Hs_12plexchip_2_4682  | v2HS_183183 | ATGGGACAGCAAGGGGAAGAGGG | NM_001040709 | SYPL2    | synaptophysin-like 2 (SYPL2), mRNA                                                                                     | -1.00         | 0.21        | 0.05         | 0.23       | -1.05           | 0.00    |
| Hs_12plexchip_5_715   | v2HS_244554 | ATACAGTCTAAACCGAACTGCA  | NM_153262    | SYT14    | synaptotagmin XIV (SYT14), mRNA                                                                                        | -2.85         | 1.34        | -0.85        | 0.89       | -2.01           | 0.11    |
| Hs_12plexchip_6_6223  | v2HS_274283 | ATGTATCCCAGTCCAAATGGA   | NM_206930    | SYTL2    | synaptotagmin-like 2 (SYTL2), transcript variant f, mRNA                                                               | -1.04         | 0.18        | 0.16         | 0.73       | -1.20           | 0.10    |
| Hs_12plexchip_3_3711  | v2HS_42673  | ATAAATCTTGAGACAGCGTCCA  | NM_004606    | TAF1     | TAF1 RNA polymerase II, TATA box binding protein (TBP)-associated factor, 250kDa (TAF1), transcript variant 1, mRNA    | -0.72         | 0.43        | 0.13         | 0.75       | -0.85           | 0.18    |
| Hs_12plexchip_6_353   | v2HS_56338  | AACCCTTACAAATCTGCTAA    | NM_005644    | TAF12    | TAF12 RNA polymerase II, TATA box binding protein (TBP)-associated factor, 20kDa (TAF12), mRNA                         | -0.76         | 0.32        | 0.44         | 1.00       | -1.20           | 0.17    |
| Hs_12plexchip_4_8915  | v2HS_172494 | AACAGTCATCAGTATGGTCGGT  | NM_003487    | TAF15    | TAF15 RNA polymerase II, TATA box binding protein (TBP)-associated factor, 68kDa (TAF15), transcript variant 2, mRNA   | -2.29         | 0.93        | -1.12        | 1.20       | -1.17           | 0.26    |
| Hs_12plexchip_4_9828  | v2HS_94996  | TATCCCAAGAAGCACTCTGCC   | NM_006951    | TAF5     | TAF5 RNA polymerase II, TATA box binding protein (TBP)-associated factor, 100kDa (TAF5), mRNA                          | -2.33         | 0.55        | -1.37        | 0.51       | -0.96           | 0.09    |
| Hs_12plexchip_4_9448  | v2HS_56318  | ATAGAAGTAAAGTCCCGGCC    | NM_139315    | TAF6     | TAF6 RNA polymerase II, TATA box binding protein (TBP)-associated factor, 80kDa (TAF6), transcript variant 2, mRNA     | -0.79         | 0.21        | 0.02         | 0.58       | -0.81           | 0.12    |
| Hs_12plexchip_5_6208  | v2HS_261946 | ATATTTGTGAAGTGACACTCGT  | NM_020791    | TAOK1    | TAO kinase 1 (TAOK1), mRNA                                                                                             | -0.76         | 0.21        | 0.05         | 0.42       | -0.81           | 0.06    |

| Probe ID              | v2HS        | Sequence                | Accession    | Symbol   | Gene Name                                                                                                                            | Mut log2 mean | Mut log2 SD | WT log2 Mean | WT log2 SD | log2 difference | P-value |
|-----------------------|-------------|-------------------------|--------------|----------|--------------------------------------------------------------------------------------------------------------------------------------|---------------|-------------|--------------|------------|-----------------|---------|
| Hs_12plexchip_5_6455  | v2HS_202996 | TTTAGACTCAAACCTCTAGGC   | NM_020791    | TAOK1    | TAO kinase 1 (TAOK1), mRNA                                                                                                           | -1.03         | 0.72        | 0.74         | 1.39       | -1.77           | 0.15    |
| Hs_12plexchip_6_10176 | v2HS_93598  | TTATAGCGACAGACTTCATGCT  | NM_018833    | TAP2     | transporter 2, ATP-binding cassette, sub-family B (MDR/TAP) (TAP2), transcript variant 2, mRNA                                       | -0.72         | 0.99        | 0.82         | 1.09       | -1.55           | 0.14    |
| Hs_12plexchip_5_1955  | v2HS_206836 | ATAGATTAGCACTTACCAGGCC  | AY114096     | TAS2R62P | TASTE RECEPTOR, TYPE 2, MEMBER 62 PSEUDOGENE                                                                                         | -1.57         | 0.19        | -0.52        | 0.16       | -1.04           | 0.00    |
| Hs_12plexchip_5_3709  | v2HS_255072 | TTTAAAGGTGGAATTGCTCAGCT | NM_015173    | TBC1D1   | TBC1 (tre-2/USP6, BUB2, cdc16) domain family, member 1 (TBC1D1), mRNA                                                                | -0.90         | 0.58        | 0.21         | 1.01       | -1.11           | 0.19    |
| Hs_12plexchip_6_9376  | v2HS_211591 | TAAACCTGTGAGAACCTGCTGG  | NM_005993    | TBCD     | tubulin folding cofactor D (TBCD), mRNA                                                                                              | -2.24         | 0.50        | 0.50         | 0.60       | -2.74           | 0.00    |
| Hs_12plexchip_6_6539  | v2HS_286944 | ATTTGTCCCAAAGCTCCTGGT   | NM_020417    | TBX20    | T-box 20 (TBX20), transcript variant 2, mRNA                                                                                         | -1.06         | 0.82        | 0.15         | 1.28       | -1.21           | 0.25    |
| Hs_12plexchip_6_8852  | v2HS_153809 | TTAAGTACTCGGATGCATTGCT  | NM_003198    | TCEB3    | transcription elongation factor B (SIII), polypeptide 3 (110kDa, elongin A) (TCEB3), mRNA                                            | -2.18         | 0.27        | -0.42        | 1.24       | -1.76           | 0.13    |
| Hs_12plexchip_2_2587  | v2HS_85843  | TTGCTGAATAACCTTAACTCCA  | NM_006706    | TCERG1   | transcription elongation regulator 1 (TCERG1), transcript variant 1, mRNA                                                            | -1.50         | 0.12        | -0.60        | 1.00       | -0.90           | 0.26    |
| Hs_12plexchip_2_8818  | v2HS_32488  | TTTGATAATCCTTGGAGTTCTCT | NM_001008536 | TCHHL1   | trichohyalin-like 1 (TCHHL1), mRNA                                                                                                   | -1.48         | 0.91        | -0.75        | 0.17       | -0.73           | 0.30    |
| Hs_12plexchip_5_7121  | v2HS_262360 | TAGTTCACACCCATGGTGGGCA  | NM_001008656 | TCOF1    | Treacher Collins-Franceschetti syndrome 1 (TCOF1), transcript variant 1, mRNA                                                        | -3.18         | 0.81        | -1.01        | 1.16       | -2.17           | 0.06    |
| Hs_12plexchip_5_7990  | v2HS_120432 | ATCCACTCGAAATTCATGCCG   | NM_182539    | TCTE1    | t-complex-associated-testis-expressed 1 (TCTE1), mRNA                                                                                | -1.27         | 0.63        | -0.43        | 0.17       | -0.84           | 0.14    |
| Hs0P00004203          | v2HS_42514  | TTGTGAATTGACTCTCTCAGTC  | NM_174910    | TCTE3    | t-complex-associated-testis-expressed 3 (TCTE3), mRNA                                                                                | -0.73         | 0.14        | 0.22         | 0.49       | -0.95           | 0.07    |
| Hs_12plexchip_4_2910  | v2HS_174999 | TTTGTTCAGAGAGATCGTGCT   | NM_001008744 | TDP1     | tyrosyl-DNA phosphodiesterase 1 (TDP1), transcript variant 2, mRNA                                                                   | -1.77         | 0.80        | -0.51        | 1.57       | -1.26           | 0.30    |
| Hs_12plexchip_6_3289  | v2HS_175002 | ATATGGCACAGGAAAGGTGGCC  | NM_001008744 | TDP1     | tyrosyl-DNA phosphodiesterase 1 (TDP1), transcript variant 2, mRNA                                                                   | -1.27         | 0.68        | -0.44        | 0.21       | -0.83           | 0.16    |
| Hs_12plexchip_5_4712  | v2HS_72674  | TATAGCCCTAGTTATAGCAGGT  | NM_021961    | TEAD1    | TEA domain family member 1 (SV40 transcriptional enhancer factor) (TEAD1), mRNA                                                      | -0.88         | 1.25        | 0.47         | 0.99       | -1.35           | 0.22    |
| Hs_12plexchip_2_9032  | v2HS_32310  | TTCAACTTGGACTGGATTCCCC  | NM_003598    | TEAD2    | TEA domain family member 2 (TEAD2), mRNA                                                                                             | -1.01         | 0.14        | 0.09         | 0.46       | -1.09           | 0.05    |
| Hs_12plexchip_4_8769  | v2HS_153885 | TAAAGAGGAGACACATCGAGCC  | NM_003216    | TEF      | thyrotrophic embryonic factor (TEF), mRNA                                                                                            | -1.27         | 1.01        | -0.26        | 0.89       | -1.01           | 0.27    |
| Hs_12plexchip_5_4898  | v2HS_87448  | GTAATTGGTCTAATAATCCCT   | NM_022366    | TFB2M    | transcription factor B2, mitochondrial (TFB2M), mRNA                                                                                 | -2.38         | 0.87        | -1.27        | 1.28       | -1.11           | 0.29    |
| Hs_12plexchip_2_1857  | v2HS_86331  | TAAGTCCATCCAAGAGGGCCCTG | NM_014553    | TFCP2L1  | transcription factor CP2-like 1 (TFCP2L1), mRNA                                                                                      | -0.80         | 0.18        | 0.11         | 0.20       | -0.91           | 0.00    |
| Hs_12plexchip_5_4816  | v2HS_256721 | TAAACTGATTAGGGTCTTTGCC  | NM_021809    | TGIF2    | TGFB-induced factor homeobox 2 (TGIF2), mRNA                                                                                         | -1.85         | 1.01        | 0.39         | 0.68       | -2.24           | 0.04    |
| Hs_12plexchip_3_1335  | v2HS_51937  | AATTATGCTGATACTCAACTGT  | NM_020147    | THAP10   | THAP domain containing 10 (THAP10), mRNA                                                                                             | -0.76         | 0.15        | 0.05         | 0.51       | -0.82           | 0.10    |
| Hs_12plexchip_4_160   | v2HS_49799  | ATAGCAAGAGAAATAATAGCTA  | NM_005131    | THOC1    | THO complex 1 (THOC1), mRNA                                                                                                          | -1.35         | 0.54        | -0.11        | 0.45       | -1.24           | 0.04    |
| Hs0P00008263          | v2HS_136850 | TAATGTCTCATGCTGTCTGGA   | NM_025075    | THOC7    | THO complex 7 homolog (Drosophila) (THOC7), mRNA                                                                                     | -0.84         | 0.36        | -0.04        | 0.58       | -0.80           | 0.13    |
| Hs_12plexchip_4_12280 | v2HS_239298 | ATCTAGAACCAAGTCCATGGCC  | NM_003250    | THRA     | thyroid hormone receptor, alpha (erythroblastic leukemia viral (v-erb-a) oncogene homolog, avian) (THRA), transcript variant 2, mRNA | -1.82         | 0.51        | -1.02        | 0.72       | -0.80           | 0.20    |
| Hs_12plexchip_6_8515  | v2HS_154053 | TATTTCTTGTCACCTCCTGGG   | NM_003251    | THRSP    | thyroid hormone responsive (SPOT14 homolog, rat) (THRSP), mRNA                                                                       | -0.77         | 0.12        | 0.12         | 0.80       | -0.89           | 0.19    |
| Hs_12plexchip_5_945   | v2HS_248909 | TTGAAGTGAAGGTGTGTGGCG   | NM_013337    | TIMM22   | translocase of inner mitochondrial membrane 22 homolog (yeast) (TIMM22), mRNA                                                        | -1.33         | 0.17        | 0.04         | 0.75       | -1.37           | 0.08    |
| Hs_12plexchip_6_9575  | v2HS_243560 | AACAAGTCTCAGGATTGGTCCG  | NM_004614    | TK2      | thymidine kinase 2, mitochondrial (TK2), mRNA                                                                                        | -1.33         | 0.54        | -0.22        | 0.28       | -1.11           | 0.05    |
| Hs_12plexchip_2_9996  | v2HS_20095  | TTACTGAATAATCTTGCTGTCT  | NM_152453    | TMCO5    | transmembrane and coiled-coil domains 5 (TMCO5), mRNA                                                                                | -0.70         | 0.34        | 0.34         | 0.26       | -1.04           | 0.02    |
| Hs_12plexchip_5_4550  | v2HS_261717 | ATAGACTTTCTCAACATTTGCT  | NM_006827    | TMED10   | transmembrane emp24-like trafficking protein 10 (yeast) (TMED10), mRNA                                                               | -1.32         | 0.51        | 0.74         | 0.61       | -2.06           | 0.01    |
| Hs_12plexchip_3_8402  | v2HS_233295 | TAGTAATAGCCCTCCAAAGGCA  | AK095650     | TMED8    | TRANSMEMBRANE EMP24 PROTEIN TRANSPORT DOMAIN CONTAINING 8                                                                            | -0.84         | 0.32        | 0.18         | 0.48       | -1.02           | 0.04    |
| Hs_12plexchip_2_300   | v2HS_100302 | TAACAGGATCCAGGTCCAGTT   | NM_178518    | TMEM102  | transmembrane protein 102 (TMEM102), mRNA                                                                                            | -1.18         | 1.60        | 0.14         | 0.78       | -1.31           | 0.29    |

| Probe ID              | v2HS        | Sequence                | Accession    | Symbol   | Gene Name                                                                     | Mut log2 mean | Mut log2 SD | WT log2 Mean | WT log2 SD | log2 difference | P-value |
|-----------------------|-------------|-------------------------|--------------|----------|-------------------------------------------------------------------------------|---------------|-------------|--------------|------------|-----------------|---------|
| Hs_12plexchip_3_7645  | v2HS_226022 | TTTATTCTTCACATCATGTGCC  | NM_024092    | TMEM109  | transmembrane protein 109 (TMEM109), mRNA                                     | -0.93         | 0.24        | -0.08        | 0.66       | -0.85           | 0.14    |
| HsOP00009636          | v2HS_138173 | ATAGTCTGTAATGATATATGCT  | NM_032256    | TMEM117  | transmembrane protein 117 (TMEM117), mRNA                                     | -0.97         | 0.66        | 1.68         | 0.40       | -2.65           | 0.01    |
| Hs_12plexchip_5_11148 | v2HS_138271 | TAAGATGTTCCCTTTGTGTGGT  | NM_032273    | TMEM126A | transmembrane protein 126A (TMEM126A), mRNA                                   | -2.07         | 1.20        | -0.66        | 0.52       | -1.41           | 0.17    |
| Hs_12plexchip_2_656   | v2HS_116379 | AATACATGGAAATTGTTGTGCT  | NM_022918    | TMEM135  | transmembrane protein 135 (TMEM135), mRNA                                     | -1.66         | 0.27        | -0.79        | 0.51       | -0.87           | 0.08    |
| Hs_12plexchip_6_6601  | v2HS_39455  | TTTGCCCTAAAGGAAGTGAGGG  | NM_001031738 | TMEM150  | transmembrane protein 150 (TMEM150), transcript variant 1, mRNA               | -0.74         | 0.45        | 0.08         | 0.81       | -0.82           | 0.22    |
| Hs_12plexchip_4_2516  | v2HS_181968 | TTGGAATTCACAGTGAGAGCA   | NM_198276    | TMEM17   | transmembrane protein 17 (TMEM17), mRNA                                       | -0.90         | 0.49        | -0.16        | 0.73       | -0.74           | 0.23    |
| Hs_12plexchip_5_9298  | v2HS_99077  | TAGGGTAAATGTTTGATTCGGA  | NM_001105199 | TMEM177  | transmembrane protein 177 (TMEM177), transcript variant 3, mRNA               | -1.43         | 0.61        | 0.21         | 0.62       | -1.64           | 0.03    |
| Hs_12plexchip_5_11856 | v2HS_245873 | TATCTTATCAGGCAGCCGGGCT  | NM_001097620 | TMEM184A | transmembrane protein 184A (TMEM184A), mRNA                                   | -0.82         | 0.15        | 0.05         | 0.70       | -0.87           | 0.16    |
| Hs_12plexchip_6_2084  | v2HS_156668 | ATGTATACCCAAAGTTAAACCC  | NM_018279    | TMEM19   | transmembrane protein 19 (TMEM19), mRNA                                       | -1.22         | 0.19        | 0.49         | 1.19       | -1.71           | 0.13    |
| Hs_12plexchip_6_5231  | v2HS_158438 | AATGAGACAATAATAATCAGGT  | NM_025246    | TMEM22   | transmembrane protein 22 (TMEM22), transcript variant 1, mRNA                 | -1.61         | 0.41        | -0.64        | 0.41       | -0.97           | 0.04    |
| Hs_12plexchip_3_2291  | v2HS_72413  | TTTAAACAAGCATGTTCTCCCTC | NM_001017970 | TMEM30B  | transmembrane protein 30B (TMEM30B), mRNA                                     | -1.28         | 0.13        | -0.18        | 0.80       | -1.10           | 0.14    |
| Hs_12plexchip_6_9408  | v2HS_155633 | ATAAATGAGTGCATGAGTTGCT  | NM_018087    | TMEM48   | transmembrane protein 48 (TMEM48), mRNA                                       | -2.78         | 0.17        | -0.48        | 0.57       | -2.30           | 0.01    |
| Hs_12plexchip_6_6716  | v2HS_137756 | TTAGGGTTGCACCAAAGAAGGT  | NM_030938    | TMEM49   | transmembrane protein 49 (TMEM49), mRNA                                       | -1.32         | 0.18        | -0.30        | 0.27       | -1.02           | 0.01    |
| Hs_12plexchip_6_11346 | v2HS_222241 | TTCCTCCGTAGGGTATGCAGGT  | NM_182532    | TMEM61   | transmembrane protein 61 (TMEM61), mRNA                                       | -0.90         | 1.32        | 0.38         | 0.70       | -1.28           | 0.23    |
| Hs_12plexchip_4_4033  | v2HS_179359 | TAGTAGGTGGTCATGATCACCA  | NM_173804    | TMEM86B  | transmembrane protein 86B (TMEM86B), mRNA                                     | -0.99         | 0.44        | -0.29        | 0.67       | -0.71           | 0.21    |
| Hs_12plexchip_5_76    | v2HS_117739 | TTCTTGCTGGAGATGCATCCCC  | NM_001077263 | TMPRSS13 | transmembrane protease, serine 13 (TMPRSS13), mRNA                            | -1.01         | 0.97        | 0.43         | 1.19       | -1.44           | 0.18    |
| Hs_12plexchip_6_5694  | v2HS_59743  | AGGAAATACCAGAGTAGCACCC  | NM_153609    | TMPRSS6  | transmembrane protease, serine 6 (TMPRSS6), mRNA                              | -1.70         | 0.74        | -0.34        | 1.35       | -1.36           | 0.22    |
| Hs_12plexchip_5_6576  | v2HS_262250 | ATTGCCCTGAATATGAGATGGT  | NM_015028    | TNIK     | TRAF2 and NCK interacting kinase (TNIK), mRNA                                 | -1.23         | 2.26        | 0.67         | 1.23       | -1.90           | 0.29    |
| Hs_12plexchip_3_9886  | v2HS_134621 | TAAATGAAGTAGAGACAGCCCA  | NM_015978    | TNNI3K   | TNNI3 interacting kinase (TNNI3K), mRNA                                       | -0.97         | 0.25        | -0.25        | 0.58       | -0.72           | 0.15    |
| Hs_12plexchip_6_10415 | v2HS_84672  | TTAGGCTTTGTTCTGACGCTT   | NM_001042781 | TNNT3    | troponin T type 3 (skeletal, fast) (TNNT3), transcript variant 3, mRNA        | -1.15         | 0.34        | -0.44        | 0.44       | -0.71           | 0.10    |
| HsOP00003586          | v2HS_50868  | TTGACCTATGGCACTGACTGGA  | NM_018996    | TNRC6C   | HYPOTHETICAL PROTEIN FLJ20015                                                 | -0.89         | 0.88        | 0.22         | 0.45       | -1.11           | 0.15    |
| Hs_12plexchip_4_10657 | v2HS_158900 | TTTATTGCTCCTGTACGAACCC  | NM_032470    | TNXB     | tenascin XB (TNXB), transcript variant XB-S, mRNA                             | -0.81         | 0.25        | -0.08        | 0.63       | -0.73           | 0.17    |
| Hs_12plexchip_5_9109  | v2HS_270206 | ATACCCAGAACACATTAAGCCT  | NM_014765    | TOMM20   | translocase of outer mitochondrial membrane 20 homolog (yeast) (TOMM20), mRNA | -1.21         | 0.35        | 0.13         | 0.30       | -1.35           | 0.01    |
| HsOP00002247          | v2HS_65386  | ATTTATACCGAGGAGATGGGAA  | NM_006114    | TOMM40   | translocase of outer mitochondrial membrane 40 homolog (yeast) (TOMM40), mRNA | -0.93         | 0.72        | -0.11        | 0.52       | -0.83           | 0.19    |
| Hs_12plexchip_3_7485  | v2HS_94079  | ATACATGTCACATAACTACGA   | NM_001067    | TOP2A    | topoisomerase (DNA) II alpha 170kDa (TOP2A), mRNA                             | -0.73         | 0.25        | 0.64         | 0.41       | -1.37           | 0.01    |
| Hs_12plexchip_5_12911 | v2HS_67513  | ATGGATTAGCACATAGTCTCCA  | NM_147184    | TP53I3   | tumor protein p53 inducible protein 3 (TP53I3), transcript variant 2, mRNA    | -1.58         | 1.51        | 0.44         | 1.80       | -2.02           | 0.21    |
| Hs_12plexchip_2_9531  | v2HS_33878  | TTTGAGATACTCTCTGCAAGCA  | NM_004179    | TPH1     | tryptophan hydroxylase 1 (tryptophan 5-monoxygenase) (TPH1), mRNA             | -1.39         | 1.04        | -0.50        | 0.18       | -0.89           | 0.28    |
| Hs_12plexchip_4_7624  | v2HS_171497 | ATAGTTCACAAGTAGTGGCA    | NM_003291    | TPP2     | tripeptidyl peptidase II (TPP2), mRNA                                         | -1.78         | 0.67        | -0.10        | 0.84       | -1.68           | 0.06    |
| Hs_12plexchip_3_11699 | v2HS_175495 | TATTTCTGCATGGAGATACGC   | NM_033502    | TRERF1   | transcriptional regulating factor 1 (TRERF1), mRNA                            | -0.91         | 0.13        | -0.18        | 0.17       | -0.73           | 0.01    |
| Hs_12plexchip_6_9503  | v2HS_153528 | AAGTATCAGCCACGGATTGGCT  | NM_003141    | TRIM21   | tripartite motif-containing 21 (TRIM21), mRNA                                 | -1.04         | 0.51        | -0.15        | 0.94       | -0.88           | 0.24    |
| HsOP00004139          | v2HS_250531 | TTGGGTTGTCTTTTCGTTTGCC  | NM_033278    | TRIM3    | TRIPARTITE MOTIF-CONTAINING 3                                                 | -2.28         | 0.46        | 0.43         | 0.11       | -2.72           | 0.01    |
| Hs_12plexchip_5_3544  | v2HS_26742  | ATTAGTTACGAAGGTTAACGCT  | NM_018700    | TRIM36   | tripartite motif-containing 36 (TRIM36), transcript variant 1, mRNA           | -1.80         | 0.16        | -0.23        | 0.69       | -1.57           | 0.05    |
| Hs_12plexchip_4_7689  | v2HS_195606 | TTCCTCAACTCTAGCTCAGCA   | NM_172016    | TRIM39   | tripartite motif-containing 39 (TRIM39), transcript variant 2, mRNA           | -1.72         | 0.86        | -0.41        | 0.69       | -1.30           | 0.11    |
| Hs_12plexchip_6_2045  | v2HS_154686 | AATTCAGAACACATGGAATGGG  | NM_017583    | TRIM44   | tripartite motif-containing 44 (TRIM44), mRNA                                 | -3.92         | 0.38        | -1.00        | 1.42       | -2.92           | 0.06    |

| Probe ID              | v2HS        | Sequence                | Accession    | Symbol  | Gene Name                                                                                       | Mut log2 mean | Mut log2 SD | WT log2 Mean | WT log2 SD | log2 difference | P-value |
|-----------------------|-------------|-------------------------|--------------|---------|-------------------------------------------------------------------------------------------------|---------------|-------------|--------------|------------|-----------------|---------|
| Hs_12plexchip_3_9574  | v2HS_195867 | ATGTCTGGAGGGCTTCAGTGCC  | NM_025058    | TRIM46  | tripartite motif-containing 46 (TRIM46), mRNA                                                   | -0.75         | 0.42        | 0.16         | 0.51       | -0.91           | 0.08    |
| Hs_12plexchip_5_3851  | v2HS_12220  | TAAGTACTTCTGGGCATAGCC   | NM_025058    | TRIM46  | tripartite motif-containing 46 (TRIM46), mRNA                                                   | -0.86         | 0.38        | 0.30         | 0.27       | -1.16           | 0.02    |
| Hs_12plexchip_4_10547 | v2HS_177429 | ATTAGTTATACCACTGTCACCG  | NM_032765    | TRIM52  | tripartite motif-containing 52 (TRIM52), mRNA                                                   | -1.20         | 0.77        | -0.05        | 0.90       | -1.15           | 0.17    |
| Hs0P00012741          | v2HS_97055  | TTAACTATAAATAAGCCAAGGT  | NM_182916    | TRNT1   | tRNA nucleotidyl transferase, CCA-adding, 1 (TRNT1), mRNA                                       | -0.77         | 0.72        | 1.15         | 0.35       | -1.93           | 0.03    |
| Hs_12plexchip_6_8684  | v2HS_218375 | TTCTTGCTGTGTCATTGTTGCCG | NM_003307    | TRPM2   | transient receptor potential cation channel, subfamily M, member 2 (TRPM2), mRNA                | -1.98         | 0.74        | 0.17         | 2.21       | -2.15           | 0.23    |
| Hs_12plexchip_3_8698  | v2HS_230250 | ATCCCGTGTATACATAATATCCA | NM_000549    | TSHB    | thyroid stimulating hormone, beta (TSHB), mRNA                                                  | -1.37         | 0.52        | -0.63        | 0.52       | -0.75           | 0.15    |
| Hs0P00003738          | v2HS_50110  | TTTGGTCAGTACTGAGTGTGGG  | NM_012339    | TSPAN15 | tetraspanin 15 (TSPAN15), mRNA                                                                  | -2.49         | 0.52        | -0.32        | 0.47       | -2.18           | 0.01    |
| Hs_12plexchip_5_5706  | v2HS_73609  | TTGCAACCTGTCCTAGAGTGCC  | NR_002781    | TSPYL3  | TSPY-like 3 (pseudogene) (TSPYL3) on chromosome 20                                              | -2.79         | 1.52        | -0.88        | 1.35       | -1.91           | 0.18    |
| Hs_12plexchip_6_1465  | v2HS_178469 | TTACACCACTGGAAATAACCC   | NM_033512    | TSPYL5  | TSPY-like 5 (TSPYL5), mRNA                                                                      | -1.42         | 0.10        | -0.71        | 0.42       | -0.71           | 0.09    |
| Hs_12plexchip_4_900   | v2HS_117659 | TTTATGGATCTTGCCAGAGCT   | NM_032028    | TSSK1B  | testis-specific serine kinase 1B (TSSK1B), mRNA                                                 | -1.51         | 0.43        | -0.48        | 0.13       | -1.03           | 0.04    |
| Hs_12plexchip_6_718   | v2HS_202692 | TAACAGCTATAAATCCATTGCT  | NM_173500    | TTBK2   | tau tubulin kinase 2 (TTBK2), mRNA                                                              | -1.83         | 1.12        | 0.03         | 1.74       | -1.86           | 0.21    |
| Hs_12plexchip_6_5974  | v2HS_157607 | TTTAATAAGAGCTCAGCCAGGT  | NM_024753    | TTC21B  | tetratricopeptide repeat domain 21B (TTC21B), mRNA                                              | -1.58         | 0.90        | 0.06         | 0.81       | -1.64           | 0.08    |
| Hs_12plexchip_4_7003  | v2HS_54477  | TTTGAAATAGAGGACATGGGCT  | NM_001010854 | TTC7B   | tetratricopeptide repeat domain 7B (TTC7B), mRNA                                                | -0.87         | 0.50        | 0.21         | 0.34       | -1.09           | 0.04    |
| Hs_12plexchip_6_2285  | v2HS_225026 | TTATTTGGTGTGGATCCAGGA   | NM_001025930 | TTL3    | tubulin tyrosine ligase-like family, member 3 (TTL3), transcript variant 1, mRNA                | -0.98         | 0.30        | -0.21        | 0.47       | -0.77           | 0.09    |
| Hs_12plexchip_2_6905  | v2HS_158729 | TTTGGGACATAGAGTGTGAGCA  | NR_001537    | TTY13   | testis-specific transcript, Y-linked 13 (TTY13) on chromosome Y                                 | -0.80         | 0.74        | 0.08         | 0.80       | -0.88           | 0.23    |
| Hs_12plexchip_2_8296  | v2HS_159397 | TTATTCCTCAGTGATACATCCA  | NR_001527    | TTY6    | testis-specific transcript, Y-linked 6 (TTY6) on chromosome Y                                   | -0.78         | 0.66        | 0.04         | 0.31       | -0.83           | 0.15    |
| Hs_12plexchip_4_10917 | v2HS_157889 | TTAGGTCTACATCAAGGGCCC   | NM_024803    | TUBAL3  | tubulin, alpha-like 3 (TUBAL3), mRNA                                                            | -3.57         | 0.58        | -1.53        | 1.41       | -2.04           | 0.11    |
| Hs_12plexchip_5_8400  | v2HS_116774 | TTGCTAGATCGAATGCTGTCCA  | NM_030773    | TUBB1   | tubulin, beta 1 (TUBB1), mRNA                                                                   | -1.47         | 0.72        | 0.08         | 1.06       | -1.55           | 0.11    |
| Hs_12plexchip_4_1805  | v2HS_5722   | TTTAGCAAGTCCATTAAGTGCC  | NM_006322    | TUBGCP3 | tubulin, gamma complex associated protein 3 (TUBGCP3), mRNA                                     | -0.92         | 0.74        | 0.06         | 1.18       | -0.98           | 0.30    |
| Hs_12plexchip_4_9302  | v2HS_199028 | TTATTGAGAACATCCAACAGGT  | NM_006322    | TUBGCP3 | tubulin, gamma complex associated protein 3 (TUBGCP3), mRNA                                     | -1.60         | 0.67        | -0.84        | 0.49       | -0.77           | 0.19    |
| Hs_12plexchip_5_12240 | v2HS_200049 | ATAGGATAAAGGATTGAGCCAG  | NM_014444    | TUBGCP4 | tubulin, gamma complex associated protein 4 (TUBGCP4), mRNA                                     | -1.22         | 0.13        | 0.04         | 0.09       | -1.26           | 0.00    |
| Hs_12plexchip_3_4474  | v2HS_118095 | TAATGAAATATTTGTACAGGGC  | NM_001102610 | TUBGCP5 | tubulin, gamma complex associated protein 5 (TUBGCP5), transcript variant 2, mRNA               | -1.47         | 0.33        | -0.50        | 0.55       | -0.97           | 0.07    |
| Hs_12plexchip_5_9682  | v2HS_231097 | ATGAATGCATTTAGACACCGGA  | NM_000474    | TWIST1  | twist homolog 1 (acrocephalosyndactyly 3; Saethre-Chotzen syndrome) (Drosophila) (TWIST1), mRNA | -1.25         | 0.21        | 0.08         | 0.21       | -1.33           | 0.00    |
| Hs_12plexchip_4_9998  | v2HS_85892  | TTATCAATTCATCTCAGAGGT   | NM_006701    | TXNL4A  | thioredoxin-like 4A (TXNL4A), mRNA                                                              | -1.77         | 1.08        | -0.76        | 0.86       | -1.01           | 0.28    |
| Hs_12plexchip_2_3705  | v2HS_84679  | TTACGGTAAATGTTCAAGAGGG  | NM_001025204 | U2AF1   | U2 small nuclear RNA auxiliary factor 1 (U2AF1), transcript variant c, mRNA                     | -1.70         | 0.84        | -0.55        | 0.51       | -1.15           | 0.13    |
| Hs0P00003414          | v2HS_68112  | TTATCTCATGACTGGTTATGCA  | NM_005499    | UBA2    | SUMO-1 ACTIVATING ENZYME SUBUNIT 2                                                              | -1.62         | 0.28        | -0.90        | 0.79       | -0.72           | 0.25    |
| Hs0P00005613          | v2HS_255026 | TTATCTAAAGCATTATAACCA   | NM_005499    | UBA2    | SUMO-1 ACTIVATING ENZYME SUBUNIT 2                                                              | -2.90         | 1.21        | -1.71        | 0.24       | -1.19           | 0.23    |
| Hs_12plexchip_4_11785 | v2HS_171713 | TTTGACCTTCTCTTGGGACGC   | NM_003333    | UBA52   | ubiquitin A-52 residue ribosomal protein fusion product 1 (UBA52), transcript variant 2, mRNA   | -2.06         | 1.10        | -0.05        | 1.98       | -2.01           | 0.22    |
| Hs_12plexchip_5_8132  | v2HS_111298 | AACTGAGAGAATCAGCTGCC    | NM_177967    | UBAC2   | UBA domain containing 2 (UBAC2), mRNA                                                           | -1.07         | 0.61        | -0.08        | 0.32       | -1.00           | 0.09    |
| Hs_12plexchip_5_10756 | v2HS_268066 | ATTGCTCCAAGAACTGGGAGCC  | NM_014847    | UBAP2L  | ubiquitin associated protein 2-like (UBAP2L), mRNA                                              | -1.17         | 0.40        | -0.38        | 0.46       | -0.79           | 0.09    |
| Hs0P00006216          | v2HS_188439 | ATTCTCAATGGTGTCACTCGGC  | NM_021009    | UBC     | UBIQUITIN C                                                                                     | -1.66         | 0.25        | -0.54        | 1.16       | -1.11           | 0.24    |
| Hs_12plexchip_6_773   | v2HS_171717 | TTTAAAGCTAATCTTCTTAGGT  | NM_153280    | UBE1    | ubiquitin-activating enzyme E1 (UBE1), transcript variant 2, mRNA                               | -1.04         | 0.36        | 0.37         | 0.65       | -1.42           | 0.04    |
| Hs0P00004936          | v2HS_171718 | TAAGGCTACCAGTCTGCTGCA   | NM_003334    | UBE1    | UBIQUITIN-ACTIVATING ENZYME E1 (A1S9T AND BN75 TEMPERATURE SENSITIVITY COMPLEMENTING)           | -1.05         | 1.80        | 0.48         | 0.78       | -1.53           | 0.28    |

| Probe ID              | v2HS        | Sequence               | Accession    | Symbol | Gene Name                                                                                  | Mut log2 mean | Mut log2 SD | WT log2 Mean | WT log2 SD | log2 difference | P-value |
|-----------------------|-------------|------------------------|--------------|--------|--------------------------------------------------------------------------------------------|---------------|-------------|--------------|------------|-----------------|---------|
| Hs_12plexchip_5_3302  | v2HS_255120 | TTATATATTAGGACAATCAGGT | NM_018227    | UBE1L2 | ubiquitin-activating enzyme E1-like 2 (UBE1L2), mRNA                                       | -0.79         | 0.31        | 0.47         | 0.85       | -1.26           | 0.11    |
| Hs_12plexchip_5_3289  | v2HS_171745 | TTGAGTGTCAAATTCAGGGCA  | NM_003338    | UBE2D1 | ubiquitin-conjugating enzyme E2D 1 (UBC4/5 homolog, yeast) (UBE2D1), mRNA                  | -0.89         | 0.63        | -0.11        | 0.35       | -0.78           | 0.15    |
| Hs_12plexchip_5_3620  | v2HS_255135 | TACTGCAATAATCAGAAGGGCT | NM_003338    | UBE2D1 | ubiquitin-conjugating enzyme E2D 1 (UBC4/5 homolog, yeast) (UBE2D1), mRNA                  | -1.16         | 0.85        | 0.64         | 0.36       | -1.79           | 0.05    |
| Hs_12plexchip_3_11143 | v2HS_134649 | TACGTTTAAGAGTCTCTCTCCC | NM_015983    | UBE2D4 | ubiquitin-conjugating enzyme E2D 4 (putative) (UBE2D4), mRNA                               | -2.22         | 0.81        | -1.33        | 0.55       | -0.89           | 0.20    |
| Hs0P00005111          | v2HS_171753 | TACAATGATAGATTCTTGCCG  | NM_003341    | UBE2E1 | UBIQUITIN-CONJUGATING ENZYME E2E 1 (UBC4/5 HOMOLOG, YEAST)                                 | -0.82         | 0.54        | 0.56         | 0.36       | -1.38           | 0.03    |
| Hs_12plexchip_4_2276  | v2HS_171781 | TATAAACACAAAGGAAGTGGCG | NM_194261    | UBE2I  | ubiquitin-conjugating enzyme E2I (UBC9 homolog, yeast) (UBE2I), transcript variant 4, mRNA | -2.56         | 0.64        | -1.32        | 0.79       | -1.25           | 0.10    |
| Hs_12plexchip_5_3552  | v2HS_254973 | ATTTAGAAGTTCCTGTATTCT  | NM_194261    | UBE2I  | ubiquitin-conjugating enzyme E2I (UBC9 homolog, yeast) (UBE2I), transcript variant 4, mRNA | -0.80         | 0.52        | -0.01        | 0.45       | -0.79           | 0.12    |
| Hs_12plexchip_6_3261  | v2HS_171776 | TTGGCAGTAAATCGTGTAGGCC | NM_194261    | UBE2I  | ubiquitin-conjugating enzyme E2I (UBC9 homolog, yeast) (UBE2I), transcript variant 4, mRNA | -1.99         | 1.01        | 0.16         | 2.51       | -2.16           | 0.27    |
| Hs_12plexchip_5_3549  | v2HS_46734  | ATTCATTTCCCATCGCTGAGTG | NM_003969    | UBE2M  | ubiquitin-conjugating enzyme E2M (UBC12 homolog, yeast) (UBE2M), mRNA                      | -1.45         | 0.65        | -0.06        | 0.65       | -1.38           | 0.06    |
| Hs_12plexchip_5_6130  | v2HS_263284 | TTTATGTCCTTCTGGATCCGCA | NM_003969    | UBE2M  | ubiquitin-conjugating enzyme E2M (UBC12 homolog, yeast) (UBE2M), mRNA                      | -1.02         | 1.34        | 0.53         | 1.18       | -1.56           | 0.21    |
| Hs_12plexchip_5_6272  | v2HS_263146 | TTAAGTCTTGATGGACAAGGG  | NM_022066    | UBE2O  | ubiquitin-conjugating enzyme E2O (UBE2O), mRNA                                             | -0.81         | 0.18        | 1.00         | 0.22       | -1.81           | 0.00    |
| Hs_12plexchip_5_7050  | v2HS_202876 | TTGAGCCTGCAGTTGTAAAGCG | NM_022066    | UBE2O  | ubiquitin-conjugating enzyme E2O (UBE2O), mRNA                                             | -1.21         | 0.32        | -0.34        | 0.14       | -0.87           | 0.03    |
| Hs_12plexchip_4_239   | v2HS_173914 | TTGATGCAGTATCCGCCAGGG  | NM_017811    | UBE2R2 | ubiquitin-conjugating enzyme E2R 2 (UBE2R2), mRNA                                          | -1.19         | 1.11        | 0.21         | 0.46       | -1.40           | 0.15    |
| Hs_12plexchip_5_3354  | v2HS_254989 | ATATGCGCCTTGAAGTAGCCGC | NM_017811    | UBE2R2 | ubiquitin-conjugating enzyme E2R 2 (UBE2R2), mRNA                                          | -1.76         | 0.51        | -0.33        | 0.36       | -1.43           | 0.02    |
| Hs_12plexchip_5_3886  | v2HS_19154  | GGTAGTAATCACTAAATGAGGT | NM_152489    | UBE2U  | ubiquitin-conjugating enzyme E2U (putative) (UBE2U), mRNA                                  | -1.16         | 0.25        | -0.43        | 0.59       | -0.73           | 0.15    |
| Hs_12plexchip_4_10216 | v2HS_82195  | ATACTCAAGCAGACTTTCCCAT | NM_023079    | UBE2Z  | ubiquitin-conjugating enzyme E2Z (UBE2Z), mRNA                                             | -0.86         | 0.39        | 0.63         | 0.81       | -1.49           | 0.07    |
| Hs_12plexchip_5_6199  | v2HS_262978 | TTAGGATGGGATCCATCTTCCC | NM_130466    | UBE3B  | ubiquitin protein ligase E3B (UBE3B), transcript variant 1, mRNA                           | -1.05         | 0.30        | 0.38         | 0.28       | -1.44           | 0.00    |
| Hs_12plexchip_6_10210 | v2HS_195955 | AATGAACTGCTGGTTGGGTCCA | NM_013444    | UBQLN2 | ubiquilin 2 (UBQLN2), mRNA                                                                 | -1.50         | 2.36        | 1.64         | 1.37       | -3.14           | 0.13    |
| Hs_12plexchip_5_12253 | v2HS_199008 | ATATAGTCTCTCATGATCTCT  | NM_014233    | UBTF   | upstream binding transcription factor, RNA polymerase I (UBTF), transcript variant 1, mRNA | -2.02         | 0.08        | -0.80        | 0.70       | -1.22           | 0.09    |
| Hs_12plexchip_6_2286  | v2HS_212292 | TTTGGAACTAACCTTCTGAGCT | NM_181713    | UBXD4  | UBX domain containing 4 (UBXD4), mRNA                                                      | -0.82         | 0.27        | 1.40         | 1.00       | -2.21           | 0.05    |
| Hs0P00008050          | v2HS_134653 | ATTGCCAAACGTGCACTGAGCC | NM_015984    | UCHL5  | ubiquitin carboxyl-terminal hydrolase L5 (UCHL5), mRNA                                     | -1.74         | 0.16        | -0.85        | 0.58       | -0.89           | 0.11    |
| Hs_12plexchip_5_1406  | v2HS_64096  | TAAACATACTTCAAACACAGCA | NM_001003684 | UCRC   | ubiquinol-cytochrome c reductase complex (7.2 kD) (UCRC), transcript variant 2, mRNA       | -1.67         | 0.20        | -0.56        | 0.46       | -1.11           | 0.04    |
| Hs_12plexchip_6_12649 | v2HS_141734 | TAGTGGTAGTAGAGGTAGTGCC | NM_001015072 | UFSP1  | inactive Ufm1-specific protease 1 (UFSP1), mRNA                                            | -0.77         | 0.15        | 0.02         | 0.90       | -0.79           | 0.27    |
| Hs_12plexchip_4_820   | v2HS_171830 | ATACTTTGCAACTTCATATCT  | NM_003358    | UGCG   | UDP-glucose ceramide glucosyltransferase (UGCG), mRNA                                      | -0.78         | 0.44        | -0.04        | 0.05       | -0.74           | 0.10    |
| Hs_12plexchip_2_9330  | v2HS_21480  | ATATAGAAGGGTATTAAGTCC  | NM_152404    | UGT3A1 | UDP glycosyltransferase 3 family, polypeptide A1 (UGT3A1), mRNA                            | -0.72         | 0.21        | 0.03         | 0.69       | -0.76           | 0.19    |
| Hs0P00000352          | v2HS_203109 | TATCATCCACATGGAACAACCC | NM_175866    | UHMK1  | U2AF HOMOLOG MOTIF (UHM) KINASE 1                                                          | -0.84         | 0.56        | -0.13        | 0.29       | -0.71           | 0.15    |
| Hs_12plexchip_4_7431  | v2HS_149461 | TTTCACCACCTTATAAATGCCA | NM_152896    | UHRF2  | ubiquitin-like, containing PHD and RING finger domains, 2 (UHRF2), mRNA                    | -1.63         | 0.57        | -0.71        | 0.49       | -0.92           | 0.10    |
| Hs_12plexchip_6_6730  | v2HS_137460 | TATGTTAGGTATAACTGCTGGT | NM_025217    | ULBP2  | UL16 binding protein 2 (ULBP2), mRNA                                                       | -0.89         | 0.66        | 0.17         | 0.65       | -1.07           | 0.12    |
| Hs_12plexchip_6_505   | v2HS_63858  | TTTATAGGCCCTTAAAGTGCT  | XM_941380    | UNC13C | PREDICTED:unc-13 homolog C (C. elegans), transcript variant 4 (UNC13C), mRNA               | -0.71         | 0.15        | 0.07         | 0.90       | -0.78           | 0.27    |
| Hs_12plexchip_6_3640  | v2HS_174805 | TAGTCTCCACATTTGAACAGCT | NM_001039675 | UNC45A | unc-45 homolog A (C. elegans) (UNC45A), transcript variant 3, mRNA                         | -1.21         | 0.20        | -0.29        | 0.99       | -0.92           | 0.24    |

| Probe ID              | v2HS        | Sequence                | Accession    | Symbol  | Gene Name                                                                                                  | Mut log2 mean | Mut log2 SD | WT log2 Mean | WT log2 SD | log2 difference | P-value |
|-----------------------|-------------|-------------------------|--------------|---------|------------------------------------------------------------------------------------------------------------|---------------|-------------|--------------|------------|-----------------|---------|
| Hs_12plexchip_5_3471  | v2HS_14546  | ATATTCACATTGCTAAGATGCA  | NM_023076    | UNKL    | unkept homolog (Drosophila)-like (UNKL), transcript variant 1, mRNA                                        | -0.79         | 0.55        | 1.38         | 0.40       | -2.17           | 0.01    |
| Hs_12plexchip_5_11657 | v2HS_140620 | ATAGCTCTGAACAACACATGGG  | NM_198464    | UNQ9391 | tryptophan/serine protease (UNQ9391), mRNA                                                                 | -0.72         | 0.17        | 0.50         | 0.51       | -1.21           | 0.04    |
| Hs_12plexchip_2_9718  | v2HS_32895  | ATATGTTCTGGTACTGGTAGGC  | NM_002911    | UPF1    | UPF1 regulator of nonsense transcripts homolog (yeast) (UPF1), mRNA                                        | -1.47         | 0.25        | -0.48        | 0.51       | -0.98           | 0.06    |
| Hs_12plexchip_5_3509  | v2HS_63901  | TTCAGCTTTCATTGGAAGGCA   | NM_013396    | USP25   | ubiquitin specific peptidase 25 (USP25), mRNA                                                              | -1.78         | 2.09        | 0.16         | 1.01       | -1.94           | 0.25    |
| Hs_12plexchip_5_3292  | v2HS_159709 | TTTAGGGTTGTGTGACTAGGT   | NM_032663    | USP30   | ubiquitin specific peptidase 30 (USP30), mRNA                                                              | -1.24         | 0.79        | 0.18         | 0.55       | -1.42           | 0.07    |
| Hs_12plexchip_6_1523  | v2HS_159253 | TTTCAGAAGGCTTGTGTGAGGC  | NM_032557    | USP38   | ubiquitin specific peptidase 38 (USP38), mRNA                                                              | -0.89         | 3.03        | 1.77         | 1.14       | -2.66           | 0.27    |
| Hs_12plexchip_6_1044  | v2HS_13479  | TTAGATATGGAGGCAACTTGGT  | NM_006590    | USP39   | ubiquitin specific peptidase 39 (USP39), mRNA                                                              | -1.40         | 0.31        | -0.30        | 0.74       | -1.10           | 0.11    |
| Hs0P00003468          | v2HS_196240 | AATTCATACCATTGCTGTCC    | NM_006590    | USP39   | UBIQUITIN SPECIFIC PEPTIDASE 39                                                                            | -1.15         | 0.57        | -0.29        | 0.85       | -0.86           | 0.23    |
| Hs0P00003809          | v2HS_62694  | TTGCTTCTTATATGACCTGCC   | XM_300919    | USP49   | Homo sapiens ubiquitin specific protease 49                                                                | -0.87         | 0.41        | 0.50         | 1.21       | -1.36           | 0.18    |
| Hs_12plexchip_5_281   | v2HS_243816 | AATATTGGTTGGGTAGGTCCC   | NM_004505    | USP6    | ubiquitin specific peptidase 6 (Tre-2 oncogene) (USP6), mRNA                                               | -1.54         | 0.83        | 0.02         | 0.40       | -1.56           | 0.06    |
| Hs_12plexchip_5_3434  | v2HS_41519  | ATAATCATTGAACITGATTGCA  | NM_001039591 | USP9X   | ubiquitin specific peptidase 9, X-linked (USP9X), transcript variant 4, mRNA                               | -0.84         | 0.87        | 0.29         | 0.54       | -1.13           | 0.14    |
| Hs_12plexchip_5_12261 | v2HS_245827 | TTAAGAGGTGGCATATTGAGGT  | NM_004654    | USP9Y   | UBIQUITIN SPECIFIC PEPTIDASE 9, Y-LINKED (FAT FACETS-LIKE, DROSOPHILA)                                     | -1.03         | 0.62        | 0.09         | 0.36       | -1.12           | 0.07    |
| Hs_12plexchip_5_2412  | v2HS_253404 | TTATTAAGTGATTAGAGCCCA   | NM_005800    | USPL1   | ubiquitin specific peptidase like 1 (USPL1), mRNA                                                          | -0.82         | 0.40        | 1.14         | 0.67       | -1.96           | 0.02    |
| Hs_12plexchip_2_2126  | v2HS_90838  | TTTGGCAAATCCGCTAGTCTT   | NM_006649    | UTP14A  | UTP14, U3 small nucleolar ribonucleoprotein, homolog A (yeast) (UTP14A), mRNA                              | -1.22         | 0.57        | -0.34        | 0.25       | -0.88           | 0.10    |
| Hs_12plexchip_3_4502  | v2HS_118064 | TTTAATAAAGGTTCCGATATGCA | NM_032175    | UTP15   | UTP15, U3 small nucleolar ribonucleoprotein, homolog (S. cerevisiae) (UTP15), mRNA                         | -1.62         | 0.42        | -0.67        | 0.63       | -0.96           | 0.10    |
| Hs_12plexchip_3_4961  | v2HS_118066 | TTAAGAACATGACTGATTTCCCT | NM_032175    | UTP15   | UTP15, U3 small nucleolar ribonucleoprotein, homolog (S. cerevisiae) (UTP15), mRNA                         | -1.60         | 0.65        | -0.61        | 1.20       | -0.99           | 0.30    |
| Hs_12plexchip_3_2869  | v2HS_71746  | GGTACATAACATCCAGACAGCT  | NM_182645    | VGLL2   | vestigial like 2 (Drosophila) (VGLL2), transcript variant 1, mRNA                                          | -1.51         | 0.40        | -0.72        | 0.72       | -0.80           | 0.19    |
| Hs_12plexchip_5_6251  | v2HS_263273 | TTTGAGCACAGGAATTGTGCC   | NM_198156    | VHL     | von Hippel-Lindau tumor suppressor (VHL), transcript variant 2, mRNA                                       | -1.05         | 0.62        | -0.25        | 0.77       | -0.80           | 0.24    |
| Hs_12plexchip_2_11994 | v2HS_41380  | CTAGAGGATAATTAACCCGG    | NM_004666    | VNN1    | vanin 1 (VNN1), mRNA                                                                                       | -1.28         | 0.08        | -0.24        | 0.32       | -1.03           | 0.03    |
| Hs_12plexchip_5_5571  | v2HS_255610 | TTTACCAACTGGATATTCGG    | NM_014703    | VPRBP   | Vpr (HIV-1) binding protein (VPRBP), mRNA                                                                  | -2.99         | 0.73        | -0.58        | 0.32       | -2.41           | 0.02    |
| Hs0P00009437          | v2HS_139560 | TAATTTATCAATTTGGCCAGCC  | NM_018080    | VPS13C  | vacuolar protein sorting 13 homolog C (S. cerevisiae) (VPS13C), transcript variant 1B, mRNA                | -0.73         | 0.55        | 0.02         | 0.62       | -0.75           | 0.19    |
| Hs_12plexchip_5_9020  | v2HS_223892 | TTAACATCATCCATCCAGAGGC  | NM_022916    | VPS33A  | vacuolar protein sorting 33 homolog A (S. cerevisiae) (VPS33A), mRNA                                       | -1.23         | 0.07        | -0.44        | 0.29       | -0.79           | 0.04    |
| Hs_12plexchip_6_5803  | v2HS_156712 | ATTTCTTCGCTCTGGTACGCA   | NM_018289    | VPS53   | vacuolar protein sorting 53 homolog (S. cerevisiae) (VPS53), mRNA                                          | -1.47         | 0.62        | 0.30         | 1.78       | -1.77           | 0.22    |
| Hs_12plexchip_6_6773  | v2HS_156711 | TAATCTTGGCAAGTCTGCCCT   | NM_018289    | VPS53   | vacuolar protein sorting 53 homolog (S. cerevisiae) (VPS53), mRNA                                          | -1.46         | 0.59        | 0.94         | 2.66       | -2.40           | 0.26    |
| Hs_12plexchip_2_10445 | v2HS_20965  | TTTGGTATCCAGCCTCTAGTCT  | NM_145206    | VTI1A   | vesicle transport through interaction with t-SNAREs homolog 1A (yeast) (VTI1A), transcript variant 2, mRNA | -1.18         | 0.38        | -0.39        | 0.33       | -0.79           | 0.06    |
| Hs_12plexchip_5_11762 | v2HS_135340 | TTTCTGTGGAGAGTAAGTGGT   | NM_100486    | WAC     | WW domain containing adaptor with coiled-coil (WAC), transcript variant 3, mRNA                            | -1.32         | 0.25        | -0.33        | 0.23       | -0.99           | 0.01    |
| Hs0P00008259          | v2HS_135345 | AATATTACATCTTCCACCA     | NM_100486    | WAC     | WW domain containing adaptor with coiled-coil (WAC), transcript variant 3, mRNA                            | -0.92         | 0.17        | 0.18         | 0.49       | -1.10           | 0.05    |
| Hs_12plexchip_3_5507  | v2HS_123467 | TTTCTCAATCTGATCCGTCGGT  | NR_003558    | WBP11P1 | WW domain binding protein 11 pseudogene 1 (WBP11P1) on chromosome 18                                       | -2.53         | 0.43        | -1.16        | 0.45       | -1.38           | 0.02    |
| Hs_12plexchip_5_8982  | v2HS_123465 | TTTCAGGACTATGTACCATGCC  | NR_003558    | WBP11P1 | WW domain binding protein 11 pseudogene 1 (WBP11P1) on chromosome 18                                       | -1.01         | 0.64        | -0.13        | 0.69       | -0.88           | 0.18    |
| Hs_12plexchip_5_5273  | v2HS_84276  | TATAAGTTCAACATCAGAGCCC  | NM_006784    | WDR3    | WD repeat domain 3 (WDR3), mRNA                                                                            | -2.84         | 0.58        | -1.50        | 0.24       | -1.34           | 0.04    |
| Hs_12plexchip_4_6384  | v2HS_56762  | TTTACATTCACAACTGCAGGC   | NM_139281    | WDR36   | WD repeat domain 36 (WDR36), mRNA                                                                          | -2.84         | 1.42        | 0.21         | 0.95       | -3.04           | 0.04    |
| Hs_12plexchip_4_9846  | v2HS_60148  | ATTCACACAATGTAATGCCCT   | NM_014023    | WDR37   | WD repeat domain 37 (WDR37), mRNA                                                                          | -1.94         | 0.57        | -0.80        | 0.66       | -1.14           | 0.09    |

| Probe ID              | v2HS        | Sequence               | Accession    | Symbol   | Gene Name                                                                                                     | Mut log2 mean | Mut log2 SD | WT log2 Mean | WT log2 SD | log2 difference | P-value |
|-----------------------|-------------|------------------------|--------------|----------|---------------------------------------------------------------------------------------------------------------|---------------|-------------|--------------|------------|-----------------|---------|
| Hs_12plexchip_5_11078 | v2HS_274001 | ATTAATTAACCTGCTACCCGT  | XM_293354    | WDR42C   | PREDICTED:WD repeat domain 42C (WDR42C), mRNA                                                                 | -0.84         | 0.18        | -0.04        | 0.23       | -0.79           | 0.01    |
| Hs_12plexchip_3_7805  | v2HS_229697 | TTATACATCAGGATTGTTAGGA | NM_015420    | WDSOF1   | WD repeats and SOF1 domain containing (WDSOF1), mRNA                                                          | -1.46         | 0.65        | -0.15        | 0.57       | -1.32           | 0.06    |
| Hs_12plexchip_5_1388  | v2HS_57489  | ATATTCCAAGTCTCAGGACCCT | NM_080869    | WFDC12   | WAP four-disulfide core domain 12 (WFDC12), mRNA                                                              | -1.04         | 0.78        | 0.31         | 0.72       | -1.36           | 0.09    |
| Hs_12plexchip_5_10529 | v2HS_100106 | TTTGACAGTTAGATATTGGGCC | NM_172005    | WFDC13   | WAP four-disulfide core domain 13 (WFDC13), mRNA                                                              | -4.35         | 0.73        | -1.80        | 1.14       | -2.55           | 0.04    |
| Hs0P00007741          | v2HS_138653 | TTCTAGCTGCTCTTGTGGGC   | NM_032345    | WIBG     | within bgn homolog (Drosophila) (WIBG), mRNA                                                                  | -1.01         | 0.70        | 0.01         | 0.41       | -1.02           | 0.11    |
| Hs_12plexchip_2_4822  | v2HS_179677 | TATAGTGAGCAATGTGCCCGT  | NM_001002838 | WNK3     | WNK lysine deficient protein kinase 3 (WNK3), transcript variant 2, mRNA                                      | -0.87         | 0.90        | 0.11         | 0.94       | -0.98           | 0.26    |
| Hs_12plexchip_2_4502  | v2HS_172039 | TTCTCACACCATGTGCAATGCC | NM_003395    | WNT9A    | wingless-type MMTV integration site family, member 9A (WNT9A), mRNA                                           | -0.81         | 0.50        | 0.28         | 0.69       | -1.08           | 0.10    |
| Hs_12plexchip_2_4319  | v2HS_81482  | TTCAGCTTTCAGGATCTCAGGG | NM_015238    | WWC1     | WW and C2 domain containing 1 (WWC1), mRNA                                                                    | -1.07         | 0.59        | 0.09         | 0.59       | -1.16           | 0.07    |
| Hs_12plexchip_2_2750  | v2HS_88697  | TTCGATGAGGCTGATATCTGCA | NM_024949    | WWC2     | WW and C2 domain containing 2 (WWC2), mRNA                                                                    | -0.74         | 0.29        | 0.02         | 0.67       | -0.76           | 0.18    |
| Hs_12plexchip_6_2109  | v2HS_59066  | TTCTTCTCTCTCTGACCAGGT  | NM_133179    | XAGE3    | X antigen family, member 3 (XAGE3), transcript variant 1, mRNA                                                | -0.75         | 0.24        | 0.24         | 0.34       | -0.99           | 0.02    |
| Hs_12plexchip_6_2859  | v2HS_179133 | TTGCTTTAGAATATCCTGTCT  | NM_173683    | XKR6     | XK, Kell blood group complex subunit-related family, member 6 (XKR6), transcript variant 2, mRNA              | -0.86         | 1.20        | 0.26         | 0.80       | -1.12           | 0.26    |
| Hs_12plexchip_4_4183  | v2HS_219836 | TTGTAGTCCATAGTATTTCTG  | NM_003400    | XPO1     | exportin 1 (CRM1 homolog, yeast) (XPO1), mRNA                                                                 | -1.01         | 0.47        | -0.22        | 0.32       | -0.79           | 0.08    |
| Hs_12plexchip_6_4455  | v2HS_219111 | TTTATGTTTCTCTTCATCAGCC | NM_003400    | XPO1     | exportin 1 (CRM1 homolog, yeast) (XPO1), mRNA                                                                 | -2.39         | 1.31        | -1.07        | 0.99       | -1.33           | 0.24    |
| Hs0P00010609          | v2HS_172053 | TTTGACAGAGACTTTCGCTGGT | NM_003400    | XPO1     | EXPORTIN 1 (CRM1 HOMOLOG, YEAST)                                                                              | -1.62         | 0.69        | -0.34        | 0.29       | -1.28           | 0.07    |
| Hs_12plexchip_5_12640 | v2HS_56413  | TAAAGAAAGAAGTGCTTGCCT  | NM_006297    | XRCC1    | X-ray repair complementing defective repair in Chinese hamster cells 1 (XRCC1), mRNA                          | -0.94         | 0.18        | 0.87         | 0.49       | -1.81           | 0.02    |
| Hs_12plexchip_6_9636  | v2HS_134639 | AATCCGTAACCATTCGGGACGT | NM_015982    | YBX2     | Y box binding protein 2 (YBX2), mRNA                                                                          | -1.50         | 2.02        | 1.64         | 2.50       | -3.14           | 0.17    |
| Hs_12plexchip_4_11979 | v2HS_69602  | GTAGTGTTTACATTGTACCC   | NM_005433    | YES1     | v-yes-1 Yamaguchi sarcoma viral oncogene homolog 1 (YES1), mRNA                                               | -1.64         | 0.70        | -0.77        | 0.72       | -0.87           | 0.21    |
| Hs_12plexchip_4_5079  | v2HS_203477 | TTTGGTAACCATCCGCTTGGCT | NM_014263    | YME1L1   | YME1-like 1 (S. cerevisiae) (YME1L1), nuclear gene encoding mitochondrial protein, transcript variant 3, mRNA | -1.43         | 1.50        | 0.12         | 1.70       | -1.55           | 0.30    |
| Hs_12plexchip_2_10673 | v2HS_15608  | AATTTGGAACAATGTGAATGAC | NM_001099270 | ZBTB34   | zinc finger and BTB domain containing 34 (ZBTB34), mRNA                                                       | -0.82         | 0.20        | -0.06        | 0.50       | -0.77           | 0.10    |
| Hs_12plexchip_5_3524  | v2HS_95592  | TTAAGGGTGGAACTGTAGTGCC | NM_014830    | ZBTB39   | zinc finger and BTB domain containing 39 (ZBTB39), mRNA                                                       | -2.52         | 0.35        | -1.48        | 0.70       | -1.04           | 0.11    |
| Hs_12plexchip_5_3512  | v2HS_95794  | TACTTCTATGCTATGGGCTGCT | NM_014872    | ZBTB5    | zinc finger and BTB domain containing 5 (ZBTB5), mRNA                                                         | -1.82         | 0.67        | -0.26        | 0.14       | -1.56           | 0.05    |
| Hs_12plexchip_3_7011  | v2HS_233704 | ATGCTAAGTACTTCACTTCCC  | NM_178547    | ZBTB8OS  | zinc finger and BTB domain containing 8 opposite strand (ZBTB8OS), mRNA                                       | -0.80         | 0.62        | 0.29         | 0.70       | -1.09           | 0.12    |
| Hs_12plexchip_3_7825  | v2HS_100450 | TTCATTATAGACCTGCATTGCT | NM_178547    | ZBTB8OS  | zinc finger and BTB domain containing 8 opposite strand (ZBTB8OS), mRNA                                       | -0.73         | 0.02        | 0.04         | 0.06       | -0.77           | 0.00    |
| Hs_12plexchip_2_6697  | v2HS_177528 | TATGACCTTGGCCTGATTGCGG | NM_032786    | ZC3H10   | zinc finger CCCH-type containing 10 (ZC3H10), mRNA                                                            | -1.55         | 0.22        | 0.06         | 0.59       | -1.61           | 0.03    |
| Hs_12plexchip_4_1308  | v2HS_205155 | TTTCTTCTACTTTGCTGGGCT  | NM_015070    | ZC3H13   | zinc finger CCCH-type containing 13 (ZC3H13), mRNA                                                            | -1.90         | 0.51        | -0.81        | 0.58       | -1.09           | 0.07    |
| Hs_12plexchip_6_6092  | v2HS_175791 | AACAGGAACAGCATCAATGGCT | NM_018471    | ZC3H15   | zinc finger CCCH-type containing 15 (ZC3H15), mRNA                                                            | -1.04         | 0.90        | 0.99         | 0.22       | -2.03           | 0.05    |
| Hs0P00010747          | v2HS_19370  | TTTCATAGTCATAATAAGGGTC | NM_144604    | ZC3H18   | zinc finger CCCH-type containing 18 (ZC3H18), mRNA                                                            | -2.32         | 0.58        | -0.62        | 0.23       | -1.71           | 0.02    |
| Hs0P00011471          | v2HS_19371  | TATAGATATATTTCTGATCCGG | NM_144604    | ZC3H18   | zinc finger CCCH-type containing 18 (ZC3H18), mRNA                                                            | -2.59         | 0.79        | -0.46        | 0.09       | -2.14           | 0.04    |
| Hs_12plexchip_4_10479 | v2HS_70944  | TGACAGTATCCTTAGCATCTA  | NM_080660    | ZC3HAV1L | zinc finger CCCH-type, antiviral 1-like (ZC3HAV1L), mRNA                                                      | -1.84         | 0.72        | -0.34        | 0.69       | -1.50           | 0.06    |
| Hs_12plexchip_3_11428 | v2HS_140667 | TAGGATCCTTACAGTCTTTGGC | NM_203303    | ZCCHC13  | zinc finger, CCHC domain containing 13 (ZCCHC13), mRNA                                                        | -0.94         | 0.52        | 0.16         | 0.76       | -1.11           | 0.12    |



| Probe ID              | v2HS        | Sequence                | Accession    | Symbol  | Gene Name                                                                      | Mut log2 mean | Mut log2 SD | WT log2 Mean | WT log2 SD | log2 difference | P-value |
|-----------------------|-------------|-------------------------|--------------|---------|--------------------------------------------------------------------------------|---------------|-------------|--------------|------------|-----------------|---------|
| Hs0P00008945          | v2HS_138554 | ATTTGTGCTCCCTTAAGCAGCA  | NM_198044    | ZDHHC16 | zinc finger, DHHC-type containing 16 (ZDHHC16), transcript variant 3, mRNA     | -0.82         | 0.33        | 0.59         | 0.87       | -1.42           | 0.09    |
| Hs_12plexchip_4_11356 | v2HS_99114  | ATGTACAGTAAGGGAGGATCGT  | NM_030613    | ZFP2    | zinc finger protein 2 homolog (mouse) (ZFP2), mRNA                             | -1.01         | 0.37        | -0.31        | 0.62       | -0.70           | 0.18    |
| Hs_12plexchip_6_3384  | v2HS_172099 | TATGGTAAAGTAAGAGATGAGCT | NM_003408    | ZFP37   | zinc finger protein 37 homolog (mouse) (ZFP37), mRNA                           | -0.72         | 0.37        | -0.02        | 0.12       | -0.70           | 0.07    |
| Hs_12plexchip_4_12302 | v2HS_219992 | ATTCATTGTCATCCATTTGCT   | NM_003410    | ZFX     | zinc finger protein, X-linked (ZFX), mRNA                                      | -0.75         | 0.80        | 0.28         | 0.73       | -1.03           | 0.17    |
| Hs_12plexchip_5_4843  | v2HS_257672 | TTAGAGCATCCTATATATGGT   | NM_001105251 | ZFYVE16 | zinc finger, FYVE domain containing 16 (ZFYVE16), transcript variant 2, mRNA   | -0.86         | 0.79        | 0.94         | 0.29       | -1.80           | 0.04    |
| Hs_12plexchip_6_5942  | v2HS_203541 | TTTCCCTCCAGGAAGACGGGC   | NM_181485    | ZGPAT   | zinc finger, CCCH-type with G patch domain (ZGPAT), transcript variant 3, mRNA | -1.09         | 0.41        | 0.07         | 0.77       | -1.16           | 0.10    |
| Hs_12plexchip_5_4248  | v2HS_260005 | TATGGTCCTGAATAGGTCTGGA  | NM_001011657 | ZMAT1   | zinc finger, matrin type 1 (ZMAT1), transcript variant 1, mRNA                 | -1.16         | 0.16        | 0.27         | 0.21       | -1.43           | 0.00    |
| Hs_12plexchip_5_3151  | v2HS_5924   | TTATACATCCAGAACACGTGCA  | NM_001039650 | ZMYM5   | zinc finger, MYM-type 5 (ZMYM5), transcript variant 1, mRNA                    | -1.49         | 1.76        | 0.57         | 0.32       | -2.06           | 0.18    |
| Hs_12plexchip_4_7916  | v2HS_172208 | AATGCTTTCAAGAATGGCCCA   | NM_003433    | ZNF132  | zinc finger protein 132 (ZNF132), mRNA                                         | -0.91         | 0.76        | -0.19        | 0.11       | -0.72           | 0.24    |
| Hs_12plexchip_5_12877 | v2HS_249122 | TTCCTGGAGTCGAGTAAGAGCC  | NM_006299    | ZNF193  | zinc finger protein 193 (ZNF193), mRNA                                         | -1.06         | 0.82        | -0.17        | 0.60       | -0.89           | 0.21    |
| Hs_12plexchip_6_280   | v2HS_72407  | CTTTAGAGTCATTTCCATGGCC  | NM_001017396 | ZNF2    | zinc finger protein 2 (ZNF2), transcript variant 2, mRNA                       | -1.36         | 1.01        | 0.31         | 1.51       | -1.67           | 0.20    |
| Hs_12plexchip_6_3551  | v2HS_172336 | ATTTCTTGTGCATATATGGCA   | NM_003457    | ZNF207  | zinc finger protein 207 (ZNF207), transcript variant 1, mRNA                   | -1.69         | 0.32        | -0.24        | 1.30       | -1.45           | 0.19    |
| Hs_12plexchip_4_10162 | v2HS_194812 | TTATAACCTTCTTTGTTCCACT  | NM_203282    | ZNF254  | zinc finger protein 254 (ZNF254), mRNA                                         | -0.75         | 0.47        | 0.57         | 1.19       | -1.32           | 0.18    |
| Hs_12plexchip_2_1211  | v2HS_78271  | ATATTGTGATGTTAATGAGGT   | NM_001012756 | ZNF260  | zinc finger protein 260 (ZNF260), mRNA                                         | -1.22         | 0.22        | -0.14        | 0.52       | -1.08           | 0.05    |
| Hs_12plexchip_5_9625  | v2HS_269844 | CACTGATCACATCTATAGGGCT  | NM_006973    | ZNF32   | zinc finger protein 32 (ZNF32), transcript variant 1, mRNA                     | -1.03         | 0.63        | -0.09        | 0.70       | -0.95           | 0.16    |
| Hs_12plexchip_3_8078  | v2HS_95012  | TTATTGATGAATACAACCTCCC  | NM_006954    | ZNF33A  | zinc finger protein 33A (ZNF33A), transcript variant 1, mRNA                   | -0.99         | 0.21        | -0.24        | 0.19       | -0.74           | 0.01    |
| Hs_12plexchip_3_3548  | v2HS_44697  | TTTGTAAGTCCCATTATCTCCC  | NM_152604    | ZNF383  | zinc finger protein 383 (ZNF383), mRNA                                         | -0.93         | 0.24        | -0.23        | 0.32       | -0.71           | 0.04    |
| Hs_12plexchip_5_10078 | v2HS_269427 | ATAAGTACCCAGTCTCCAGCA   | NM_133460    | ZNF418  | zinc finger protein 418 (ZNF418), mRNA                                         | -2.73         | 0.15        | -1.42        | 1.45       | -1.32           | 0.25    |
| Hs0P00002755          | v2HS_50817  | ATAAGTACTCCATACTGACAT   | NM_145312    | ZNF485  | zinc finger protein 485 (ZNF485), mRNA                                         | -1.05         | 0.39        | -0.22        | 0.27       | -0.82           | 0.05    |
| Hs_12plexchip_5_10988 | v2HS_138954 | ATTTATGTAGTACTTCTGGCT   | NM_032434    | ZNF512  | zinc finger protein 512 (ZNF512), mRNA                                         | -0.90         | 0.19        | 0.23         | 0.60       | -1.13           | 0.07    |
| Hs_12plexchip_3_7494  | v2HS_101447 | TAACAAGAGAAGAATGGGGCT   | NR_003127    | ZNF542  | zinc finger protein 542 (ZNF542) on chromosome 19                              | -0.86         | 0.77        | 0.33         | 0.81       | -1.19           | 0.14    |
| Hs_12plexchip_5_756   | v2HS_45336  | ATTAATCACCAATAAAGTACCC  | NM_153231    | ZNF550  | ZINC FINGER PROTEIN 550                                                        | -0.98         | 0.56        | 0.24         | 0.68       | -1.22           | 0.08    |
| Hs_12plexchip_2_5625  | v2HS_177071 | ATGTGAATTAATTTGCACAGGT  | NM_024967    | ZNF556  | zinc finger protein 556 (ZNF556), mRNA                                         | -0.79         | 0.48        | -0.01        | 0.26       | -0.78           | 0.09    |
| Hs_12plexchip_6_1603  | v2HS_17118  | TTATCTCTTCTTGAACACGCG   | NM_144694    | ZNF570  | zinc finger protein 570 (ZNF570), mRNA                                         | -0.86         | 0.66        | 0.25         | 1.32       | -1.12           | 0.28    |
| Hs_12plexchip_6_7051  | v2HS_44731  | TTGAACCTCCGCTGGCAGCGCA  | NM_152600    | ZNF579  | zinc finger protein 579 (ZNF579), mRNA                                         | -1.34         | 1.10        | -0.17        | 1.14       | -1.17           | 0.27    |
| Hs_12plexchip_6_6835  | v2HS_160859 | TTTCCAGTGTGATAGAGGCT    | NM_173548    | ZNF584  | zinc finger protein 584 (ZNF584), mRNA                                         | -1.16         | 0.54        | 0.42         | 0.55       | -1.58           | 0.02    |
| Hs_12plexchip_5_4624  | v2HS_256407 | ATATTGACCCGGGATTAGCGGG  | NM_020747    | ZNF608  | zinc finger protein 608 (ZNF608), mRNA                                         | -1.33         | 0.13        | -0.55        | 0.52       | -0.78           | 0.12    |
| Hs_12plexchip_6_7902  | v2HS_190494 | TTGGAATGAAACTTGCAGGCC   | NM_020394    | ZNF695  | zinc finger protein 695 (ZNF695), mRNA                                         | -1.28         | 0.19        | -0.52        | 0.44       | -0.76           | 0.08    |
| Hs_12plexchip_6_9382  | v2HS_156561 | TTTCTCTTGTGTACTTCCCG    | NM_018260    | ZNF701  | zinc finger protein 701 (ZNF701), mRNA                                         | -0.70         | 1.20        | 0.47         | 1.25       | -1.18           | 0.30    |
| Hs_12plexchip_6_2598  | v2HS_172179 | TTAATGAGACAGTGGTTCTGGC  | NM_003426    | ZNF74   | zinc finger protein 74 (ZNF74), transcript variant 1, mRNA                     | -0.70         | 0.87        | 0.66         | 0.67       | -1.36           | 0.10    |
| Hs_12plexchip_2_4774  | v2HS_172188 | TTAATTGACTGTGGTGTGAGGA  | NM_003427    | ZNF76   | zinc finger protein 76 (expressed in testis) (ZNF76), mRNA                     | -0.71         | 0.98        | 0.25         | 0.15       | -0.95           | 0.23    |
| Hs_12plexchip_2_6568  | v2HS_179114 | TTGGGCTTCTGGCTGAAGCGGC  | NM_173680    | ZNF775  | zinc finger protein 775 (ZNF775), mRNA                                         | -1.63         | 0.53        | -0.70        | 0.64       | -0.93           | 0.13    |
| Hs_12plexchip_5_7160  | v2HS_114647 | ATTGTCAAAGAAATTAACAGCC  | NM_015694    | ZNF777  | zinc finger protein 777 (ZNF777), mRNA                                         | -0.72         | 0.14        | 0.20         | 0.61       | -0.93           | 0.11    |
| Hs_12plexchip_5_12603 | v2HS_245331 | AATAATCCATCTTAAGACTCCT  | NM_004773    | ZNHIT3  | zinc finger, HIT type 3 (ZNHIT3), mRNA                                         | -0.75         | 0.56        | 0.05         | 0.44       | -0.80           | 0.13    |
| Hs_12plexchip_5_3497  | v2HS_14719  | TTTGAAACCACTATGGCAGCC   | BG475343     | ZNRF1   | HYPOTHETICAL PROTEIN DKFPZP434E229                                             | -2.54         | 0.86        | -1.66        | 0.45       | -0.88           | 0.21    |
| Hs_12plexchip_5_3477  | v2HS_14391  | TTAAATCCTCCAACATGTGCC   | NM_147128    | ZNRF2   | zinc and ring finger 2 (ZNRF2), mRNA                                           | -0.74         | 0.16        | -0.04        | 0.15       | -0.70           | 0.01    |
| Hs_12plexchip_4_8079  | v2HS_14651  | ATTTCACTTGGGACCATGACCT  | NM_032173    | ZNRF3   | zinc and ring finger 3 (ZNRF3), mRNA                                           | -1.84         | 0.94        | -0.92        | 0.25       | -0.92           | 0.23    |
| Hs_12plexchip_3_8540  | v2HS_96860  | ATATGGAAGCCCAATATCAGCC  | NM_015534    | ZZZ3    | zinc finger, ZZ-type containing 3 (ZZZ3), mRNA                                 | -1.05         | 0.66        | -0.28        | 0.76       | -0.77           | 0.26    |

**Supplemental Table 2. Candidate RSL shRNAs based on stringent statistical criteria.**

The qualifying criteria for shRNAs are the same as listed in Table 1 legend except with a p value  $\leq 0.1$ .

| Probe ID              | v2HS        | Sequence                | Accession    | Symbol   | Gene Name                                                                               | Mut log2 mean | Mut log2 SD | WT log2 Mean | WT log2 SD | log2 difference | P-value |
|-----------------------|-------------|-------------------------|--------------|----------|-----------------------------------------------------------------------------------------|---------------|-------------|--------------|------------|-----------------|---------|
| Hs_12plexchip_5_4881  | v2HS_255771 | ATAGACTTTCACATATGGCTGGT | NM_000014    | A2M      | alpha-2-macroglobulin (A2M), mRNA                                                       | -1.15         | 0.46        | 0.73         | 0.70       | -1.88           | 0.02    |
| Hs_12plexchip_3_7348  | v2HS_100516 | TATATGCTCGATTCTCAGGA    | NM_178559    | ABCB5    | ATP-binding cassette, sub-family B (MDR/TAP), member 5 (ABCB5), mRNA                    | -1.18         | 0.12        | 0.08         | 0.15       | -1.26           | 0.00    |
| Hs_12plexchip_2_1754  | v2HS_81153  | TTTAGGAAAGCCTGGTCCCA    | NM_001080454 | ACSM4    | acyl-CoA synthetase medium-chain family member 4 (ACSM4), mRNA                          | -1.17         | 0.59        | -0.16        | 0.45       | -1.01           | 0.08    |
| Hs_12plexchip_5_7113  | v2HS_197509 | TAAACCTTGAGCGTACAAGTC   | NM_001005386 | ACTR2    | ARP2 actin-related protein 2 homolog (yeast) (ACTR2), transcript variant 1, mRNA        | -1.31         | 0.55        | -0.19        | 0.41       | -1.12           | 0.05    |
| Hs_12plexchip_5_5343  | v2HS_91340  | TAATGATCTGGGAACCTAGCCC  | NM_001077401 | ACVRL1   | activin A receptor type II-like 1 (ACVRL1), transcript variant 2, mRNA                  | -1.24         | 0.97        | 0.52         | 0.69       | -1.76           | 0.07    |
| HsOP00011130          | v2HS_33582  | TTTAACTTCCACAGTCTTGCCCT | NM_021723    | ADAM22   | ADAM metalloproteinase domain 22 (ADAM22), transcript variant 1, mRNA                   | -1.15         | 0.16        | 0.14         | 0.20       | -1.29           | 0.00    |
| HsOP00011915          | v2HS_25008  | ATAGTGGAGTAGTCGGTGGGCG  | NM_213604    | ADAMTSL5 | ADAMTS-like 5 (ADAMTSL5), mRNA                                                          | -1.35         | 0.20        | -0.23        | 0.36       | -1.12           | 0.02    |
| Hs_12plexchip_4_174   | v2HS_94323  | ATACAGCTCCTCATTGTCTCGG  | NM_001115    | ADCY8    | adenylate cyclase 8 (brain) (ADCY8), mRNA                                               | -1.60         | 0.75        | -0.25        | 0.52       | -1.35           | 0.07    |
| HsOP00001565          | v2HS_63897  | ATTACCAACATGAGTTGCTGGC  | NM_139178    | ALKBH3   | alkB, alkylation repair homolog 3 (E. coli) (ALKBH3), mRNA                              | -1.27         | 0.16        | -0.26        | 0.22       | -1.01           | 0.00    |
| Hs_12plexchip_3_11335 | v2HS_238167 | TATTGGTGTGCTGACTCGC     | NM_032306    | ALKBH7   | alkB, alkylation repair homolog 7 (E. coli) (ALKBH7), mRNA                              | -1.65         | 0.05        | -0.35        | 0.24       | -1.31           | 0.01    |
| Hs_12plexchip_4_11284 | v2HS_98169  | AATAGACATATCCATGGTGCCT  | NM_022662    | ANAPC1   | anaphase promoting complex subunit 1 (ANAPC1), mRNA                                     | -1.74         | 0.26        | 0.35         | 0.66       | -2.08           | 0.02    |
| Hs_12plexchip_5_3713  | v2HS_254660 | ATACAATGGAATACAGATTGCT  | NM_013367    | ANAPC4   | anaphase promoting complex subunit 4 (ANAPC4), mRNA                                     | -1.32         | 0.20        | 0.45         | 0.63       | -1.78           | 0.03    |
| Hs_12plexchip_5_9857  | v2HS_268762 | AAGAGTTCACAATTTCAAGGCT  | NM_001154    | ANXA5    | annexin A5 (ANXA5), mRNA                                                                | -1.67         | 0.54        | -0.35        | 0.31       | -1.31           | 0.03    |
| Hs_12plexchip_5_6098  | v2HS_262529 | TATAATGATCCTCATATAACCA  | NM_001018159 | APPBP1   | amyloid beta precursor protein binding protein 1 (APPBP1), transcript variant 2, mRNA   | -2.57         | 1.47        | 0.62         | 0.08       | -3.19           | 0.06    |
| Hs_12plexchip_4_2811  | v2HS_219865 | ATTATTGTGAAAGCTCGTGGG   | NM_003491    | ARD1A    | ARD1 homolog A, N-acetyltransferase (S. cerevisiae) (ARD1A), mRNA                       | -1.05         | 0.54        | 0.08         | 0.37       | -1.14           | 0.05    |
| Hs_12plexchip_6_1612  | v2HS_201002 | ATCTTTGGAGTAATCTTCGC    | NM_017519    | ARID1B   | AT rich interactive domain 1B (SWI1-like) (ARID1B), transcript variant 1, mRNA          | -1.54         | 0.28        | 0.07         | 1.01       | -1.60           | 0.10    |
| Hs_12plexchip_4_1272  | v2HS_198492 | GACCACCTTAAAGAAGCACTGCA | NM_001037164 | ARL4A    | ADP-ribosylation factor-like 4A (ARL4A), transcript variant 3, mRNA                     | -1.67         | 0.58        | -0.63        | 0.57       | -1.04           | 0.09    |
| Hs_12plexchip_4_1283  | v2HS_5802   | TAGCAAAGAGACATTGTATCCT  | NM_152862    | ARPC2    | actin related protein 2/3 complex, subunit 2, 34kDa (ARPC2), transcript variant 1, mRNA | -1.88         | 0.10        | -0.74        | 0.41       | -1.14           | 0.03    |
| Hs_12plexchip_2_12230 | v2HS_202600 | TTACTTATCTTATTAAGCGCC   | NM_005719    | ARPC3    | actin related protein 2/3 complex, subunit 3, 21kDa (ARPC3), mRNA                       | -1.01         | 0.10        | 0.20         | 0.44       | -1.22           | 0.04    |
| Hs_12plexchip_5_881   | v2HS_249261 | AATCACTGGTTCCTGGCATGGG  | NM_080863    | ASB16    | ankyrin repeat and SOCS box-containing 16 (ASB16), mRNA                                 | -1.24         | 0.62        | 0.37         | 0.10       | -1.61           | 0.04    |
| Hs_12plexchip_5_11693 | v2HS_138999 | TAAAGGGATCTAGGCTTCGGC   | NM_033027    | AXUD1    | AXIN1 up-regulated 1 (AXUD1), mRNA                                                      | -2.29         | 0.36        | -0.99        | 0.80       | -1.30           | 0.09    |
| Hs_12plexchip_5_9112  | v2HS_233010 | ATAGTTCCTCCAAAGCCTTTGCT | NM_001195    | BFSP1    | beaded filament structural protein 1, filensin (BFSP1), mRNA                            | -1.68         | 0.39        | -0.42        | 0.28       | -1.26           | 0.01    |
| Hs_12plexchip_5_4769  | v2HS_257526 | ATTACTAGATTATTGGCCGCT   | NM_032194    | BXDC1    | brix domain containing 1 (BXDC1), mRNA                                                  | -1.44         | 0.33        | 0.43         | 1.01       | -1.87           | 0.07    |
| Hs_12plexchip_6_4225  | v2HS_275380 | TTGAACAAGGAATTTAGCAGAT  | NM_018321    | BXDC2    | brix domain containing 2 (BXDC2), mRNA                                                  | -2.51         | 0.94        | -0.33        | 1.42       | -2.18           | 0.10    |
| Hs_12plexchip_5_11048 | v2HS_235217 | TTTACCAAAGTTCAAGATAGGC  | NM_025065    | BXDC5    | brix domain containing 5 (BXDC5), mRNA                                                  | -1.09         | 0.89        | 0.66         | 0.41       | -1.75           | 0.06    |
| Hs_12plexchip_4_3707  | v2HS_221262 | ATCAAGAACATCTTACTGTCCA  | NM_173590    | C11ORF36 | CHROMOSOME 11 OPEN READING FRAME 36                                                     | -1.48         | 0.75        | -0.33        | 0.46       | -1.15           | 0.10    |
| Hs_12plexchip_6_7155  | v2HS_228510 | AATAGTTTCAGTTGCTCAGCCC  | NM_032127    | C11orf56 | chromosome 11 open reading frame 56 (C11orf56), transcript variant 1, mRNA              | -1.75         | 1.06        | 0.51         | 0.61       | -2.26           | 0.04    |
| Hs_12plexchip_6_4960  | v2HS_285512 | TTGTTGTAGGAGACCTCAGGC   | NM_173578    | C11orf72 | chromosome 11 open reading frame 72 (C11orf72), mRNA                                    | -1.18         | 0.47        | -0.17        | 0.33       | -1.01           | 0.05    |
| Hs_12plexchip_5_8254  | v2HS_264911 | TTATACTCTTATAACATTGCG   | NM_001099676 | C12orf56 | chromosome 12 open reading frame 56 (C12orf56), mRNA                                    | -1.30         | 0.36        | -0.17        | 0.17       | -1.13           | 0.02    |
| Hs_12plexchip_5_12893 | v2HS_59558  | ATTAGCATGGATCGTCTGTTCT  | NM_014059    | C13orf15 | chromosome 13 open reading frame 15 (C13orf15), mRNA                                    | -1.48         | 0.73        | 0.21         | 0.69       | -1.68           | 0.04    |
| HsOP00012174          | v2HS_19844  | AATAATTCAGACATATCCTCTCT | NM_145248    | C13orf28 | chromosome 13 open reading frame 28 (C13orf28), mRNA                                    | -1.60         | 0.54        | -0.47        | 0.68       | -1.12           | 0.09    |
| Hs_12plexchip_5_12662 | v2HS_23231  | TTATAAGACAATTTATCAGGCA  | NM_134447    | C19orf2  | chromosome 19 open reading frame 2 (C19orf2), transcript variant 2, mRNA                | -3.13         | 0.71        | 0.04         | 1.96       | -3.16           | 0.09    |

| Probe ID              | v2HS        | Sequence                | Accession    | Symbol    | Gene Name                                                                                               | Mut log2 mean | Mut log2 SD | WT log2 Mean | WT log2 SD | log2 difference | P-value |
|-----------------------|-------------|-------------------------|--------------|-----------|---------------------------------------------------------------------------------------------------------|---------------|-------------|--------------|------------|-----------------|---------|
| Hs_12plexchip_5_11563 | v2HS_272110 | TTGCTCTGATACTCAATGAGCT  | NM_030933    | C1orf14   | chromosome 1 open reading frame 14 (C1orf14), mRNA                                                      | -1.27         | 0.14        | 0.13         | 0.76       | -1.40           | 0.08    |
| Hs_12plexchip_4_5204  | v2HS_17999  | TGTAGATTTTCATCCAGTCTCTC | NM_024331    | C20orf121 | chromosome 20 open reading frame 121 (C20orf121), transcript variant 1, mRNA                            | -2.93         | 0.22        | 0.05         | 0.60       | -2.98           | 0.01    |
| Hs_12plexchip_3_12552 | v2HS_244109 | TTGTAATCAAGATTCTTGGGCG  | NM_018944    | C21orf45  | chromosome 21 open reading frame 45 (C21orf45), mRNA                                                    | -3.27         | 0.94        | -0.63        | 0.44       | -2.64           | 0.02    |
| Hs_12plexchip_2_11284 | v2HS_47645  | TAAGGGATGGAGAGACACAGCC  | NM_058188    | C21ORF67  | CHROMOSOME 21 OPEN READING FRAME 67                                                                     | -1.70         | 0.20        | -0.60        | 0.63       | -1.09           | 0.08    |
| Hs_12plexchip_6_7110  | v2HS_35694  | GATGTAGTACACCTTGGCGGCA  | NM_207307    | C3orf25   | chromosome 3 open reading frame 25 (C3orf25), mRNA                                                      | -1.61         | 0.38        | -0.21        | 0.45       | -1.40           | 0.02    |
| Hs_12plexchip_6_8467  | v2HS_284705 | TTGGGCTGTACATAATATGGT   | NM_001001343 | C5orf40   | chromosome 5 open reading frame 40 (C5orf40), mRNA                                                      | -1.08         | 0.05        | 0.12         | 0.21       | -1.20           | 0.01    |
| Hs_12plexchip_4_8659  | v2HS_89094  | TTGTGAGAGGCTTGAATGGCT   | NM_000065    | C6        | complement component 6 (C6), mRNA                                                                       | -1.21         | 0.45        | -0.06        | 0.59       | -1.15           | 0.06    |
| Hs_12plexchip_6_1960  | v2HS_154208 | TTGTAAGTCTTAGGATATGCC   | NM_001040437 | C6orf48   | chromosome 6 open reading frame 48 (C6orf48), transcript variant 1, mRNA                                | -1.20         | 0.13        | 0.02         | 0.34       | -1.22           | 0.01    |
| Hs_12plexchip_6_3737  | v2HS_174884 | ATTGAGACTGAGATATTCACCG  | NM_017994    | C7orf42   | chromosome 7 open reading frame 42 (C7orf42), mRNA                                                      | -1.40         | 0.67        | 0.10         | 0.84       | -1.50           | 0.08    |
| Hs_12plexchip_5_4096  | v2HS_87013  | TTTAGCAATGCAGAACTTGGCA  | NM_148179    | C9orf23   | chromosome 9 open reading frame 23 (C9orf23), transcript variant 2, mRNA                                | -2.09         | 0.72        | 0.25         | 0.22       | -2.34           | 0.02    |
| Hs_12plexchip_6_10789 | v2HS_160717 | TTCCAGATTAATCACAAAGGCT  | NM_173521    | C9orf84   | chromosome 9 open reading frame 84 (C9orf84), transcript variant 1, mRNA                                | -1.05         | 0.60        | 0.93         | 1.25       | -1.99           | 0.09    |
| Hs_12plexchip_4_2803  | v2HS_186977 | TTTGTCTTATCCCGTGGGCT    | NM_173550    | C9orf93   | chromosome 9 open reading frame 93 (C9orf93), mRNA                                                      | -2.17         | 0.76        | -0.82        | 0.53       | -1.35           | 0.07    |
| Hs_12plexchip_5_7273  | v2HS_263904 | TTTCTCTACAACCTTGATCCT   | NM_206925    | CA12      | carbonic anhydrase XII (CA12), transcript variant 2, mRNA                                               | -1.59         | 0.07        | -0.27        | 0.15       | -1.32           | 0.00    |
| Hs_12plexchip_5_12635 | v2HS_248549 | TTTAGAAATGGGAGGACCAGCC  | NM_006030    | CACNA2D2  | calcium channel, voltage-dependent, alpha 2/delta subunit 2 (CACNA2D2), transcript variant 2, mRNA      | -1.16         | 0.27        | 0.07         | 0.30       | -1.23           | 0.01    |
| Hs_12plexchip_4_9782  | v2HS_15097  | TTGTATTCTGAGTCTCCGTGCA  | NM_004343    | CALR      | calreticulin (CALR), mRNA                                                                               | -2.33         | 0.73        | -0.50        | 0.86       | -1.82           | 0.05    |
| Hs_12plexchip_5_4216  | v2HS_256535 | ATTTGAATGGGATTCTATCCT   | NM_199141    | CARM1     | coactivator-associated arginine methyltransferase 1 (CARM1), mRNA                                       | -1.52         | 0.55        | -0.23        | 0.22       | -1.29           | 0.04    |
| Hs_12plexchip_4_10865 | v2HS_38737  | ATAGACAAAGGATTGACAGGC   | NM_144508    | CASC5     | cancer susceptibility candidate 5 (CASC5), transcript variant 2, mRNA                                   | -1.59         | 0.44        | -0.46        | 0.16       | -1.13           | 0.03    |
| Hs_12plexchip_5_5327  | v2HS_88343  | ATAGTGGGATAAATCTCACCG   | NM_053054    | CATSPER1  | cation channel, sperm associated 1 (CATSPER1), mRNA                                                     | -1.93         | 0.38        | -0.32        | 0.64       | -1.61           | 0.03    |
| Hs_12plexchip_5_139   | v2HS_245413 | TTAGTCTTCATATATCAACCT   | NM_152549    | CCDC112   | coiled-coil domain containing 112 (CCDC112), transcript variant 2, mRNA                                 | -1.58         | 0.19        | 0.09         | 0.35       | -1.67           | 0.01    |
| Hs_12plexchip_6_2225  | v2HS_33560  | ATAGTCCAAGAGGAAGTCTCCA  | NM_033626    | CCDC120   | coiled-coil domain containing 120 (CCDC120), mRNA                                                       | -1.36         | 0.43        | -0.28        | 0.41       | -1.08           | 0.03    |
| Hs0P00003883          | v2HS_197544 | TAATGCATTTACTTATTTCC    | NM_005893    | CCIN      | CALICIN                                                                                                 | -1.41         | 0.91        | 0.25         | 0.62       | -1.66           | 0.07    |
| Hs_12plexchip_4_500   | v2HS_112771 | TTTGTCTTCCAAGGAGGAACGG  | NM_001237    | CCNA2     | cyclin A2 (CCNA2), mRNA                                                                                 | -1.84         | 0.56        | -0.65        | 0.58       | -1.19           | 0.06    |
| Hs_12plexchip_4_1037  | v2HS_198914 | TATCCATGCTTAAGAATACGT   | NM_006431    | CCT2      | chaperonin containing TCP1, subunit 2 (beta) (CCT2), mRNA                                               | -2.09         | 0.48        | -0.86        | 0.26       | -1.24           | 0.03    |
| Hs_12plexchip_5_3556  | v2HS_254661 | TATTCTAATCCAATATACAGCA  | NM_001078645 | CDC16     | cell division cycle 16 homolog (S. cerevisiae) (CDC16), transcript variant 2, mRNA                      | -1.51         | 0.17        | 0.03         | 0.17       | -1.54           | 0.00    |
| Hs_12plexchip_5_3479  | v2HS_226246 | ATAATGATTCAAAGGGAGACCA  | NM_001256    | CDC27     | cell division cycle 27 homolog (S. cerevisiae) (CDC27), mRNA                                            | -1.11         | 0.36        | 0.03         | 0.29       | -1.14           | 0.01    |
| Hs_12plexchip_5_11993 | v2HS_272144 | TTAAGTAATGCTAATTTAAACCA | NM_024529    | CDC73     | cell division cycle 73, Paf1/RNA polymerase II complex component, homolog (S. cerevisiae) (CDC73), mRNA | -4.70         | 1.03        | -0.63        | 0.30       | -4.08           | 0.01    |
| Hs_12plexchip_4_10431 | v2HS_155714 | AATTTCCACTAACTAGGGAGGT  | NM_018101    | CDCA8     | cell division cycle associated 8 (CDCA8), mRNA                                                          | -2.01         | 0.82        | -0.03        | 0.27       | -1.98           | 0.04    |
| Hs_12plexchip_4_8826  | v2HS_150461 | TTTGTACTCGGAAGAAGTGGC   | NM_001795    | CDH5      | cadherin 5, type 2, VE-cadherin (vascular epithelium) (CDH5), mRNA                                      | -1.57         | 0.99        | 0.65         | 1.16       | -2.22           | 0.07    |
| Hs_12plexchip_4_182   | v2HS_134767 | ATGATCATAAGCCAAAGCCC    | NM_016508    | CDKL3     | cyclin-dependent kinase-like 3 (CDKL3), mRNA                                                            | -1.30         | 1.14        | 0.67         | 0.74       | -1.97           | 0.08    |
| Hs_12plexchip_6_10314 | v2HS_150582 | TTAGATGTGCCATGAGGTACCG  | NM_001025201 | CHN1      | chimerin (chimaerin) 1 (CHN1), transcript variant 2, mRNA                                               | -1.32         | 0.62        | -0.21        | 0.53       | -1.11           | 0.08    |
| Hs_12plexchip_5_5654  | v2HS_256894 | TAATTCGAAGCAAATCACAGCT  | NM_000083    | CLCN1     | chloride channel 1, skeletal muscle (Thomsen disease, autosomal dominant) (CLCN1), mRNA                 | -1.31         | 0.45        | -0.18        | 0.22       | -1.13           | 0.03    |

| Probe ID              | v2HS        | Sequence                | Accession    | Symbol       | Gene Name                                                                                                                                 | Mut log2 mean | Mut log2 SD | WT log2 Mean | WT log2 SD | log2 difference | P-value |
|-----------------------|-------------|-------------------------|--------------|--------------|-------------------------------------------------------------------------------------------------------------------------------------------|---------------|-------------|--------------|------------|-----------------|---------|
| Hs0P00005661          | v2HS_115260 | TATCAATGGCATAGGACAGCGT  | NM_206999    | CNOT1        | CCR4-NOT transcription complex, subunit 1 (CNOT1), transcript variant 2, mRNA                                                             | -2.09         | 0.52        | 0.51         | 0.34       | -2.60           | 0.00    |
| Hs0P00004205          | v2HS_254700 | TTTATCCCGATTTCATAAGCA   | NM_004236    | COPS2        | COP9 CONSTITUTIVE PHOTOMORPHOGENIC HOMOLOG SUBUNIT 2 (ARABIDOPSIS)                                                                        | -1.37         | 0.10        | -0.01        | 0.06       | -1.37           | 0.00    |
| Hs0P00005048          | v2HS_229617 | TTAGCTTAATACACAGAGACCC  | NM_016129    | COPS4        | COP9 CONSTITUTIVE PHOTOMORPHOGENIC HOMOLOG SUBUNIT 4 (ARABIDOPSIS)                                                                        | -3.17         | 0.96        | 1.41         | 0.62       | -4.59           | 0.00    |
| Hs0P00005841          | v2HS_258048 | ATATTTAGGACACTTCAGAGCA  | NM_006837    | COPS5        | COP9 CONSTITUTIVE PHOTOMORPHOGENIC HOMOLOG SUBUNIT 5 (ARABIDOPSIS)                                                                        | -1.56         | 0.22        | -0.29        | 0.31       | -1.27           | 0.01    |
| Hs0P00006089          | v2HS_118859 | ATATAAAGCTAGAAGCTGACCA  | NM_198189    | COPS8        | COP9 CONSTITUTIVE PHOTOMORPHOGENIC HOMOLOG SUBUNIT 8 (ARABIDOPSIS)                                                                        | -1.15         | 0.70        | 0.53         | 0.23       | -1.68           | 0.04    |
| Hs_12plexchip_4_467   | v2HS_159527 | TTCTCCTTCTCCTTCAGGGCCT  | NM_032609    | COX4I2       | cytochrome c oxidase subunit IV isoform 2 (lung) (COX4I2), nuclear gene encoding mitochondrial protein, mRNA                              | -2.40         | 0.26        | -0.54        | 0.49       | -1.86           | 0.01    |
| Hs_12plexchip_2_9846  | v2HS_16655  | ATGGGTAATAAATATTAGTGTCT | NM_003851    | CREG1        | cellular repressor of E1A-stimulated genes 1 (CREG1), mRNA                                                                                | -1.39         | 0.47        | -0.14        | 0.37       | -1.25           | 0.03    |
| Hs_12plexchip_5_10727 | v2HS_135449 | ATACACTTCCGTGCATGGGCA   | NM_016652    | CRNKL1       | crooked neck pre-mRNA splicing factor-like 1 (Drosophila) (CRNKL1), mRNA                                                                  | -1.57         | 0.65        | -0.33        | 0.41       | -1.24           | 0.06    |
| Hs_12plexchip_5_9115  | v2HS_97938  | TTGATGCATTAGGGTAGATGGG  | NM_016190    | CRNN         | cornulin (CRNN), mRNA                                                                                                                     | -1.11         | 0.13        | 0.23         | 0.15       | -1.34           | 0.00    |
| Hs_12plexchip_3_11951 | v2HS_239988 | TTATTTCCAGAGGTTCTGTCCC  | NM_003798    | CTNNA1       | catenin (cadherin-associated protein), alpha-like 1 (CTNNA1), mRNA                                                                        | -1.29         | 0.46        | -0.12        | 0.48       | -1.17           | 0.04    |
| Hs_12plexchip_6_1286  | v2HS_62138  | ATCTGAAAGGAGTTACTATGCT  | NM_004937    | CTNS         | cystinosis, nephropathic (CTNS), transcript variant 2, mRNA                                                                               | -1.34         | 0.42        | 0.46         | 0.62       | -1.80           | 0.02    |
| Hs_12plexchip_6_4024  | v2HS_178400 | ATAAAGTGACATTCCTGGGC    | NM_033427    | CTTNBP2      | cortactin binding protein 2 (CTTNBP2), mRNA                                                                                               | -1.16         | 1.07        | 1.49         | 1.42       | -2.64           | 0.07    |
| Hs_12plexchip_4_11416 | v2HS_200239 | GTATAGACACCGATGGTAAGCT  | NM_001100812 | CXCL16       | chemokine (C-X-C motif) ligand 16 (CXCL16), transcript variant 2, mRNA                                                                    | -1.60         | 0.16        | -0.47        | 0.54       | -1.13           | 0.06    |
| Hs_12plexchip_3_2537  | v2HS_58298  | ATATGGTTTCCCAATCCCTGTG  | AK021694     | CXORF10      | CHROMOSOME X OPEN READING FRAME 10                                                                                                        | -1.38         | 0.26        | 0.17         | 0.84       | -1.55           | 0.07    |
| Hs0P00009553          | v2HS_144182 | TTTCTGGAGAGTTGCTGGGC    | CR605567     | CXORF40A     | CHROMOSOME X OPEN READING FRAME 40A                                                                                                       | -2.08         | 0.54        | -0.28        | 0.22       | -1.80           | 0.02    |
| Hs_12plexchip_4_7656  | v2HS_93339  | TTTATTCTACCCTGCAGGACCC  | NM_001026213 | CYP11B1      | cytochrome P450, family 11, subfamily B, polypeptide 1 (CYP11B1), nuclear gene encoding mitochondrial protein, transcript variant 2, mRNA | -1.49         | 0.79        | 0.04         | 0.62       | -1.53           | 0.06    |
| Hs_12plexchip_6_9470  | v2HS_24094  | TTAAGGTGGGACATAGGGAGGA  | NM_004393    | DAG1         | dystroglycan 1 (dystrophin-associated glycoprotein 1) (DAG1), mRNA                                                                        | -1.16         | 0.45        | -0.11        | 0.26       | -1.05           | 0.04    |
| Hs_12plexchip_5_7128  | v2HS_202258 | TATTGGGATGTTTCACTCGGCG  | NM_001040261 | DCLK2        | doublecortin-like kinase 2 (DCLK2), transcript variant 2, mRNA                                                                            | -1.77         | 0.50        | -0.24        | 0.28       | -1.53           | 0.02    |
| Hs_12plexchip_2_869   | v2HS_114977 | TTTGTAAGAGTCAGGAGGACCT  | NM_016221    | DCTN4        | dynactin 4 (p62) (DCTN4), mRNA                                                                                                            | -1.22         | 0.16        | -0.14        | 0.37       | -1.08           | 0.02    |
| Hs_12plexchip_2_9105  | v2HS_30469  | TAATGGTGGTAAATCTGCCCA   | NM_018665    | DDX43        | DEAD (Asp-Glu-Ala-Asp) box polypeptide 43 (DDX43), mRNA                                                                                   | -1.42         | 0.58        | -0.31        | 0.47       | -1.11           | 0.06    |
| Hs0P00006485          | v2HS_98186  | TTGGATGACCGTCTGGAGGCC   | NM_022719    | DGCR14       | DiGeorge syndrome critical region gene 14 (DGCR14), mRNA                                                                                  | -2.01         | 0.56        | 0.28         | 1.37       | -2.29           | 0.09    |
| Hs_12plexchip_5_7535  | v2HS_227147 | ATCACTAACACGATTTGGCCT   | NM_001105571 | DHRS7C       | dehydrogenase/reductase (SDR family) member 7C (DHRS7C), mRNA                                                                             | -1.19         | 0.67        | 1.13         | 0.91       | -2.31           | 0.03    |
| Hs0P00000365          | v2HS_60544  | TTGTCTCTGATAATAGTGAGCA  | NM_014003    | DHX38        | DEAH (Asp-Glu-Ala-His) box polypeptide 38 (DHX38), mRNA                                                                                   | -2.17         | 0.12        | -0.98        | 0.29       | -1.19           | 0.01    |
| Hs_12plexchip_4_874   | v2HS_202805 | TTAGCTTCTGCTGATCTGCC    | NM_022105    | DIDO1        | death inducer-obliterator 1 (DIDO1), transcript variant 1, mRNA                                                                           | -1.40         | 0.15        | -0.13        | 0.27       | -1.27           | 0.00    |
| Hs_12plexchip_5_5655  | v2HS_258802 | TTCCCACTGTGCTATGTTTGA   | BX537874     | DKFZP313P036 | HYPOTHETICAL PROTEIN DKFZP313P036                                                                                                         | -1.36         | 0.80        | -0.09        | 0.54       | -1.27           | 0.09    |
| Hs_12plexchip_3_6731  | v2HS_96969  | AATGGGTATGAGGAAATGCT    | NM_015569    | DNM3         | dynamin 3 (DNM3), mRNA                                                                                                                    | -1.45         | 0.60        | 0.48         | 0.70       | -1.93           | 0.02    |
| Hs_12plexchip_4_10262 | v2HS_118260 | TTCTCTGCTCCGTAGTGTCTCCA | NM_052951    | DNMTIP1      | deoxynucleotidyltransferase, terminal, interacting protein 1 (DNMTIP1), mRNA                                                              | -1.02         | 1.24        | 0.92         | 0.82       | -1.94           | 0.10    |
| Hs_12plexchip_3_2463  | v2HS_70419  | ATTGGAGAGGACATCCTGATGC  | NM_080677    | DYNLL2       | dynein, light chain, LC8-type 2 (DYNLL2), mRNA                                                                                            | -1.95         | 0.28        | -0.01        | 0.47       | -1.94           | 0.01    |
| Hs_12plexchip_5_5910  | v2HS_257261 | TTATGATCTCAATGTGACAGGG  | NM_021783    | EDA2R        | ectodysplasin A2 receptor (EDA2R), mRNA                                                                                                   | -1.66         | 0.74        | -0.11        | 0.36       | -1.55           | 0.05    |
| Hs_12plexchip_3_4772  | v2HS_113620 | TTTGATAGACATCCTGGAGAGGC | NM_001402    | EEF1A1       | eukaryotic translation elongation factor 1 alpha 1 (EEF1A1), mRNA                                                                         | -2.31         | 0.19        | -0.58        | 0.46       | -1.73           | 0.01    |
| Hs_12plexchip_5_12827 | v2HS_172951 | TTACAAAGGGACTTGTGTGCGA  | NM_004093    | EFNB2        | ephrin-B2 (EFNB2), mRNA                                                                                                                   | -1.29         | 0.16        | 0.28         | 0.53       | -1.58           | 0.03    |
| Hs0P00006261          | v2MM_45585  | TAAAGGAATTTCTTCCAACGC   | NM_010123    | EIF3S10      | EUKARYOTIC TRANSLATION INITIATION FACTOR 3, SUBUNIT 10 (THETA)                                                                            | -1.16         | 0.26        | 0.33         | 0.38       | -1.50           | 0.01    |

| Probe ID              | v2HS        | Sequence                 | Accession    | Symbol   | Gene Name                                                                                 | Mut log2 mean | Mut log2 SD | WT log2 Mean | WT log2 SD | log2 difference | P-value |
|-----------------------|-------------|--------------------------|--------------|----------|-------------------------------------------------------------------------------------------|---------------|-------------|--------------|------------|-----------------|---------|
| Hs0P00005681          | v2HS_23869  | TCTTGACTCTGCTACTGTCTT    | NM_003755    | EIF3S4   | EUKARYOTIC TRANSLATION INITIATION FACTOR 3, SUBUNIT 4 DELTA, 44KDA                        | -1.79         | 0.95        | 0.22         | 0.65       | -2.01           | 0.05    |
| Hs0P00005621          | v2HS_242811 | TTAAGAAATCTTGAGGCCAGCG   | NM_003752    | EIF3S8   | EUKARYOTIC TRANSLATION INITIATION FACTOR 3, SUBUNIT 8, 110KDA                             | -2.18         | 0.63        | -0.09        | 0.60       | -2.09           | 0.01    |
| Hs_12plexchip_5_7166  | v2HS_255274 | ATTCITTTACAAAGTTAATGGCC  | NM_014740    | EIF4A3   | eukaryotic translation initiation factor 4A, isoform 3 (EIF4A3), mRNA                     | -2.37         | 0.67        | 0.30         | 0.18       | -2.66           | 0.01    |
| Hs_12plexchip_5_10681 | v2HS_268779 | TAGAGCCCAATCATTGTTTCCA   | NM_133455    | EMID1    | EMI domain containing 1 (EMID1), mRNA                                                     | -2.41         | 0.52        | -0.64        | 0.69       | -1.77           | 0.03    |
| Hs_12plexchip_4_10304 | v2HS_96160  | ATTATCATAACCATGGTCACCT   | NM_014936    | ENPP4    | ectonucleotide pyrophosphatase/phosphodiesterase 4 (putative function) (ENPP4), mRNA      | -1.31         | 0.75        | -0.04        | 0.24       | -1.27           | 0.09    |
| Hs_12plexchip_5_21    | v2HS_251354 | TTTACCTAATATGGTTTGTGCT   | NM_021572    | ENPP5    | ectonucleotide pyrophosphatase/phosphodiesterase 5 (putative function) (ENPP5), mRNA      | -1.56         | 0.56        | -0.24        | 0.50       | -1.33           | 0.04    |
| Hs_12plexchip_4_5890  | v2HS_17728  | TATAAATGTAACCATCTCACCC   | NM_004446    | EPRS     | glutamyl-prolyl-tRNA synthetase (EPRS), mRNA                                              | -2.04         | 0.31        | -0.51        | 0.55       | -1.53           | 0.02    |
| Hs_12plexchip_5_12713 | v2HS_242534 | ATGTGATAGAGGGACTGTTGGG   | NM_004450    | ERH      | enhancer of rudimentary homolog (Drosophila) (ERH), mRNA                                  | -2.18         | 0.70        | 0.43         | 0.15       | -2.61           | 0.02    |
| Hs_12plexchip_6_4135  | v2HS_275659 | ATTTAGTTCATATTGATAAGGA   | NM_002685    | EXOSC10  | exosome component 10 (EXOSC10), transcript variant 2, mRNA                                | -1.26         | 0.32        | 0.65         | 0.50       | -1.91           | 0.01    |
| Hs_12plexchip_5_6463  | v2HS_262285 | TATATTGACAGTTCCTACTAGGCG | NM_019037    | EXOSC4   | exosome component 4 (EXOSC4), mRNA                                                        | -2.33         | 0.50        | 0.28         | 0.40       | -2.60           | 0.00    |
| Hs_12plexchip_5_12923 | v2HS_46919  | ATACATGTGACCATAGAGTGCG   | NM_003950    | F2RL3    | coagulation factor II (thrombin) receptor-like 3 (F2RL3), mRNA                            | -1.19         | 0.30        | 0.28         | 0.31       | -1.47           | 0.00    |
| Hs_12plexchip_6_10663 | v2HS_179101 | TTCTCGTGGTTCAGTATAGCCT   | NM_173678    | FAM139A  | family with sequence similarity 139, member A (FAM139A), mRNA                             | -1.48         | 0.53        | 0.90         | 0.79       | -2.37           | 0.02    |
| Hs_12plexchip_4_4693  | v2HS_83637  | TTTCTGAGTGGTCATAACTCCT   | NM_000135    | FANCA    | Fanconi anemia, complementation group A (FANCA), transcript variant 1, mRNA               | -1.71         | 0.17        | -0.68        | 0.60       | -1.03           | 0.09    |
| Hs0P00010700          | v2HS_113773 | TTCTCTCCATAAACTGATTCCC   | NM_001436    | FBL      | FIBRILLARIN                                                                               | -2.07         | 0.04        | -0.02        | 0.69       | -2.05           | 0.03    |
| Hs_12plexchip_5_3246  | v2HS_51035  | TACATTACAAAGTTCTCTGCG    | NM_012308    | FBXL11   | F-box and leucine-rich repeat protein 11 (FBXL11), mRNA                                   | -1.20         | 0.34        | 0.11         | 0.13       | -1.31           | 0.01    |
| Hs_12plexchip_6_3356  | v2HS_263207 | TTGTGCAAAAGGTTCTTAATGCA  | NM_032875    | FBXL20   | F-box and leucine-rich repeat protein 20 (FBXL20), mRNA                                   | -1.24         | 0.37        | 0.41         | 0.26       | -1.65           | 0.00    |
| Hs_12plexchip_5_6011  | v2HS_47264  | ATTTGACCTCAGAATGACGGTG   | NM_174899    | FBXO36   | F-box protein 36 (FBXO36), mRNA                                                           | -2.45         | 0.25        | 0.49         | 1.40       | -2.94           | 0.06    |
| Hs_12plexchip_4_7702  | v2HS_89328  | ATATTCTGAGACTTTGCATGGT   | NM_001013415 | FBXW7    | F-box and WD repeat domain containing 7 (FBXW7), transcript variant 3, mRNA               | -1.15         | 0.70        | 0.34         | 0.34       | -1.49           | 0.05    |
| Hs_12plexchip_4_8858  | v2HS_93704  | TTGTAAGTACTATTCTCTTCT    | NM_000566    | FCGR1A   | Fc fragment of IgG, high affinity Ia, receptor (CD64) (FCGR1A), mRNA                      | -1.05         | 0.67        | 0.50         | 0.68       | -1.55           | 0.05    |
| Hs_12plexchip_3_4414  | v2HS_50567  | TTAACTCAGACACTGAGAGCC    | NM_001042548 | FEZ2     | fasciculation and elongation protein zeta 2 (zygin II) (FEZ2), transcript variant 2, mRNA | -1.60         | 0.55        | -0.31        | 0.79       | -1.29           | 0.09    |
| Hs_12plexchip_6_9356  | v2HS_155310 | TTGTAAGATCTGCACAGACCC    | NM_018029    | FLJ10213 | hypothetical protein FLJ10213 (FLJ10213), mRNA                                            | -1.14         | 1.39        | 2.22         | 1.06       | -3.36           | 0.03    |
| Hs0P00012742          | v2HS_103190 | TTATTGCCTTACTTCTGTGGG    | AK092066     | FLJ34747 | HYPOTHETICAL GENE SUPPORTED BY AK092066                                                   | -1.43         | 0.08        | 0.23         | 0.50       | -1.66           | 0.03    |
| Hs_12plexchip_3_5599  | v2HS_129545 | ATTTGCCTTGAGGACATTTGCC   | AK124699     | FLJ42709 | HYPOTHETICAL GENE SUPPORTED BY AK124699                                                   | -1.20         | 0.58        | 0.60         | 0.41       | -1.80           | 0.01    |
| Hs_12plexchip_3_4576  | v2HS_121611 | TTAACCATTTAGGTGATGGCA    | AK075161     | FLJ90680 | FLJ90680 PROTEIN                                                                          | -1.67         | 0.33        | -0.59        | 0.65       | -1.08           | 0.08    |
| Hs_12plexchip_5_12296 | v2HS_247736 | TATTTGAGCCATCTGTGACCC    | NM_013231    | FLRT2    | fibronectin leucine rich transmembrane protein 2 (FLRT2), mRNA                            | -1.39         | 0.17        | -0.18        | 0.40       | -1.21           | 0.02    |
| Hs_12plexchip_5_3203  | v2HS_204193 | AACAATTCGGAGTTTATACCTG   | XM_941378    | FOXR1    | PREDICTED:forkhead box R1 (FOXR1), mRNA                                                   | -1.40         | 0.44        | -0.31        | 0.23       | -1.08           | 0.03    |
| Hs_12plexchip_3_857   | v2HS_36153  | CTAATGATGGATACTTTGGCCT   | NM_144966    | FREM1    | FRAS1 related extracellular matrix 1 (FREM1), mRNA                                        | -1.00         | 0.32        | 0.07         | 0.20       | -1.07           | 0.01    |
| Hs_12plexchip_3_8782  | v2HS_95990  | ATTGATAACCTGGCTAATCCCA   | NM_014907    | FRMPD1   | FERM and PDZ domain containing 1 (FRMPD1), mRNA                                           | -1.10         | 0.15        | 0.01         | 0.54       | -1.11           | 0.06    |
| Hs_12plexchip_5_12561 | v2HS_42851  | TAAAGTTACAATGCAGTCTTGC   | NM_005257    | GATA6    | GATA binding protein 6 (GATA6), mRNA                                                      | -1.40         | 0.09        | -0.12        | 0.07       | -1.28           | 0.00    |
| Hs_12plexchip_6_2560  | v2HS_155064 | AATGCTGTGGATTGTCTGAGCC   | NM_017660    | GATAD2A  | GATA zinc finger domain containing 2A (GATAD2A), mRNA                                     | -1.57         | 0.58        | 0.68         | 0.07       | -2.24           | 0.02    |
| Hs0P00003410          | v2HS_36125  | TTTGGGAAGGAAGGGCAAGGCT   | NM_004752    | GCM2     | glial cells missing homolog 2 (Drosophila) (GCM2), mRNA                                   | -1.61         | 0.36        | -0.44        | 0.58       | -1.17           | 0.05    |
| Hs_12plexchip_5_12786 | v2HS_249954 | TTCTCATCCAGGAAGAGGACCC   | NM_004962    | GDF10    | growth differentiation factor 10 (GDF10), mRNA                                            | -2.00         | 0.44        | -0.78        | 0.67       | -1.22           | 0.07    |

| Probe ID              | v2HS        | Sequence                | Accession | Symbol | Gene Name                                                                                                                | Mut log2 mean | Mut log2 SD | WT log2 Mean | WT log2 SD | log2 difference | P-value |
|-----------------------|-------------|-------------------------|-----------|--------|--------------------------------------------------------------------------------------------------------------------------|---------------|-------------|--------------|------------|-----------------|---------|
| Hs_12plexchip_6_12552 | v2HS_212899 | TTTCAGTGATCTGTTGTGGCAG  | NM_000168 | GLI3   | GLI-Kruppel family member GLI3 (Greig cephalopolysyndactyly syndrome) (GLI3), mRNA                                       | -1.31         | 0.52        | 0.68         | 0.38       | -1.99           | 0.01    |
| Hs_12plexchip_3_1559  | v2HS_65339  | TTATTCCATACAGCCCTGGCCC  | NM_013334 | GMPPB  | GDP-mannose pyrophosphorylase B (GMPPB), transcript variant 1, mRNA                                                      | -1.30         | 0.61        | -0.28        | 0.18       | -1.02           | 0.09    |
| Hs_12plexchip_6_1270  | v2HS_220370 | ATACTGTTGCTCTTAGGGCGGT  | NM_019067 | GNL3L  | guanine nucleotide binding protein-like 3 (nucleolar)-like (GNL3L), mRNA                                                 | -1.13         | 0.27        | 0.01         | 0.70       | -1.14           | 0.09    |
| Hs_12plexchip_5_10795 | v2HS_138347 | TTAACCTTCTCTACTCTCTGCA  | NM_032292 | GON4L  | gon-4-like (C. elegans) (GON4L), transcript variant 2, mRNA                                                              | -1.40         | 0.07        | -0.25        | 0.24       | -1.15           | 0.01    |
| Hs_12plexchip_6_374   | v2HS_55806  | CTGCTTCATCATGGGCAGGT    | NM_005682 | GPR56  | G protein-coupled receptor 56 (GPR56), transcript variant 1, mRNA                                                        | -2.85         | 1.14        | 0.24         | 1.68       | -3.08           | 0.07    |
| Hs_12plexchip_4_10370 | v2HS_159238 | TAAAGCATTGATTGACTGAGCC  | NM_032554 | GPR81  | G protein-coupled receptor 81 (GPR81), mRNA                                                                              | -1.89         | 0.88        | 0.33         | 0.44       | -2.23           | 0.03    |
| Hs_12plexchip_4_7095  | v2HS_68798  | TATAGTCATGGAGTCCAGCCT   | NM_004810 | GRAP2  | GRB2-related adaptor protein 2 (GRAP2), mRNA                                                                             | -2.01         | 0.69        | -0.72        | 0.46       | -1.28           | 0.06    |
| Hs_12plexchip_6_4378  | v2HS_179821 | TATTTCCACCATCAAGGGTCCC  | XM_940982 | GRIP2  | PREDICTED:glutamate receptor interacting protein 2, transcript variant 2 (GRIP2), mRNA                                   | -1.34         | 0.72        | -0.14        | 0.25       | -1.19           | 0.09    |
| Hs_12plexchip_5_8971  | v2HS_265999 | TTATTAATTAGCACAAATTAGGT | NM_002094 | GSPT1  | G1 to S phase transition 1 (GSPT1), mRNA                                                                                 | -1.06         | 0.27        | 0.15         | 0.40       | -1.20           | 0.02    |
| Hs_12plexchip_5_7036  | v2HS_133007 | TTTGAGAATGTATTGCCTCCGA  | NM_002110 | HCK    | hemopoietic cell kinase (HCK), mRNA                                                                                      | -1.01         | 0.27        | 0.05         | 0.54       | -1.06           | 0.06    |
| Hs_12plexchip_5_3240  | v2HS_211804 | TTACACAAAGGGTCACTTCTC   | NM_138820 | HIGD2A | HIG1 domain family, member 2A (HIGD2A), mRNA                                                                             | -1.70         | 0.64        | -0.22        | 0.45       | -1.48           | 0.04    |
| Hs_12plexchip_6_1839  | v2HS_195911 | ATCTAGAAATGGAACCACTGCT  | NM_005517 | HMG2   | high-mobility group nucleosomal binding domain 2 (HMG2), mRNA                                                            | -1.74         | 0.60        | 0.12         | 0.47       | -1.87           | 0.02    |
| Hs_12plexchip_6_78    | v2HS_117147 | ATGGGATAAGATTCTAAACCC   | NM_004500 | HNRNPC | heterogeneous nuclear ribonucleoprotein C (C1/C2) (HNRNPC), transcript variant 2, mRNA                                   | -2.01         | 0.72        | -0.86        | 0.21       | -1.14           | 0.10    |
| Hs_12plexchip_4_8899  | v2HS_133162 | ATATTTACAAGCTTTGGGCCCT  | NM_002147 | HOXB5  | homeobox B5 (HOXB5), mRNA                                                                                                | -1.13         | 0.96        | 1.29         | 0.62       | -2.42           | 0.03    |
| Hs0P00007673          | v2HS_136048 | TTCTTCTGTTTCATCTGCGGT   | NM_024501 | HOXD1  | homeobox D1 (HOXD1), mRNA                                                                                                | -1.18         | 0.40        | 0.24         | 0.46       | -1.42           | 0.02    |
| Hs_12plexchip_2_4291  | v2HS_82370  | TTTGATAATGTGACTGTGTGGC  | NM_000198 | HSD3B2 | hydroxy-delta-5-steroid dehydrogenase, 3 beta- and steroid delta-isomerase 2 (HSD3B2), mRNA                              | -1.22         | 0.30        | 0.13         | 0.50       | -1.35           | 0.02    |
| Hs_12plexchip_6_6626  | v2HS_137326 | TAGAAGTCCCTCATGATCTGGT  | NM_025193 | HSD3B7 | hydroxy-delta-5-steroid dehydrogenase, 3 beta- and steroid delta-isomerase 7 (HSD3B7), mRNA                              | -1.86         | 0.41        | -0.58        | 0.29       | -1.28           | 0.01    |
| Hs_12plexchip_3_11020 | v2HS_138414 | TTTAGATGCAAGGTAGGTGCT   | NM_032303 | HSDL2  | hydroxysteroid dehydrogenase like 2 (HSDL2), mRNA                                                                        | -1.31         | 0.81        | 0.08         | 0.46       | -1.39           | 0.08    |
| Hs_12plexchip_4_521   | v2HS_115310 | ATTAATCCAGCAGCTCTAGCT   | NM_016299 | HSPA14 | heat shock 70kDa protein 14 (HSPA14), transcript variant 1, mRNA                                                         | -1.67         | 0.87        | 0.14         | 0.79       | -1.81           | 0.06    |
| Hs_12plexchip_2_6111  | v2HS_173169 | ATTGTTTGGTGGTGACAGCC    | NM_004134 | HSPA9  | heat shock 70kDa protein 9 (mortalin) (HSPA9), nuclear gene encoding mitochondrial protein, mRNA                         | -2.33         | 0.41        | -0.64        | 0.41       | -1.69           | 0.01    |
| Hs_12plexchip_3_11065 | v2HS_193423 | TTTAAGTTCAGCAATTACAGCA  | NM_199440 | HSPD1  | heat shock 60kDa protein 1 (chaperonin) (HSPD1), nuclear gene encoding mitochondrial protein, transcript variant 2, mRNA | -1.42         | 0.27        | -0.02        | 0.51       | -1.40           | 0.02    |
| Hs_12plexchip_5_6173  | v2HS_262858 | TTTAGGATCAGATTATCTGCT   | NM_031407 | HUWE1  | HECT, UBA and WWE domain containing 1 (HUWE1), mRNA                                                                      | -1.29         | 0.70        | 0.24         | 0.61       | -1.53           | 0.05    |
| Hs_12plexchip_5_11771 | v2HS_133238 | TTAATCAGATATAATCTGAGGG  | NM_013417 | IARS   | isoleucyl-tRNA synthetase (IARS), transcript variant long, mRNA                                                          | -2.72         | 0.34        | -0.75        | 0.24       | -1.96           | 0.00    |
| Hs_12plexchip_6_9815  | v2HS_155481 | ATAGTCTCAAATGTGTTTCCA   | NM_018060 | IARS2  | isoleucyl-tRNA synthetase 2, mitochondrial (IARS2), mRNA                                                                 | -2.36         | 0.67        | -0.66        | 1.13       | -1.69           | 0.10    |
| Hs_12plexchip_5_3710  | v2HS_96821  | TTAAACACTCAGAAACAAACCA  | NM_015525 | IBTK   | inhibitor of Bruton agammaglobulinemia tyrosine kinase (IBTK), mRNA                                                      | -1.03         | 0.38        | 0.19         | 0.17       | -1.23           | 0.02    |
| Hs_12plexchip_4_6153  | v2HS_27524  | ATAATTATGCTCTCAACAGCC   | NM_003640 | IKBKAP | inhibitor of kappa light polypeptide gene enhancer in B-cells, kinase complex-associated protein (IKBKAP), mRNA          | -1.30         | 0.95        | 0.49         | 0.89       | -1.79           | 0.08    |
| Hs_12plexchip_5_7783  | v2HS_266151 | TTCTTCAGTTGCTTAGAGGGCC  | AK095107  | IL1RAP | INTERLEUKIN 1 RECEPTOR ACCESSORY PROTEIN                                                                                 | -1.22         | 0.48        | -0.02        | 0.41       | -1.20           | 0.03    |
| Hs_12plexchip_4_7333  | v2HS_72166  | TTGAAGAAGACACGGGCAGGG   | NM_004136 | IREB2  | iron-responsive element binding protein 2 (IREB2), mRNA                                                                  | -1.97         | 0.43        | -0.50        | 0.63       | -1.47           | 0.03    |
| Hs0P00000643          | v2HS_67751  | ATTACCAAGGACACTCTATCTG  | NM_004867 | ITM2A  | integral membrane protein 2A (ITM2A), mRNA                                                                               | -1.05         | 0.62        | 0.00         | 0.16       | -1.05           | 0.09    |

| Probe ID              | v2HS        | Sequence                | Accession    | Symbol       | Gene Name                                                                                                                                                               | Mut log2 mean | Mut log2 SD | WT log2 Mean | WT log2 SD | log2 difference | P-value |
|-----------------------|-------------|-------------------------|--------------|--------------|-------------------------------------------------------------------------------------------------------------------------------------------------------------------------|---------------|-------------|--------------|------------|-----------------|---------|
| Hs_12plexchip_4_993   | v2HS_133559 | TTTCACCAATCATACTGTCCC   | NM_002227    | JAK1         | Janus kinase 1 (a protein tyrosine kinase) (JAK1), mRNA                                                                                                                 | -1.98         | 0.31        | -0.56        | 0.50       | -1.42           | 0.02    |
| Hs_12plexchip_3_11418 | v2HS_135205 | TTTGCATATGATCTCGAAACCA  | NM_016604    | JMJD1B       | jumonji domain containing 1B (JMJD1B), mRNA                                                                                                                             | -1.70         | 0.36        | -0.66        | 0.61       | -1.04           | 0.08    |
| Hs_12plexchip_5_933   | v2HS_247394 | TTATAATTTCTGGAATTGGCCA  | NM_005548    | KARS         | lysyl-tRNA synthetase (KARS), mRNA                                                                                                                                      | -1.44         | 0.27        | -0.40        | 0.41       | -1.04           | 0.03    |
| Hs_12plexchip_3_456   | v2HS_52418  | ATATTCATAAATACACACAGCA  | NM_020122    | KCMF1        | potassium channel modulatory factor 1 (KCMF1), mRNA                                                                                                                     | -1.09         | 0.38        | 0.07         | 0.76       | -1.16           | 0.10    |
| Hs_12plexchip_4_4613  | v2HS_160241 | ATATCGATCCAGTTTCTGGCC   | NM_173162    | KCNH7        | potassium voltage-gated channel, subfamily H (eag-related), member 7 (KCNH7), transcript variant 2, mRNA                                                                | -1.12         | 0.83        | 0.51         | 0.26       | -1.63           | 0.07    |
| Hs_12plexchip_5_3542  | v2HS_14575  | ATTCCATGTAAGAGTAAAGGCA  | NM_138444    | KCTD12       | potassium channel tetramerisation domain containing 12 (KCTD12), mRNA                                                                                                   | -2.25         | 0.34        | -0.49        | 0.58       | -1.76           | 0.02    |
| Hs_12plexchip_5_9238  | v2HS_98989  | TTAAGGTGTAGTGACATAGGCT  | NM_024089    | KDEL1        | KDEL (Lys-Asp-Glu-Leu) containing 1 (KDEL1), mRNA                                                                                                                       | -1.04         | 0.47        | 0.25         | 0.19       | -1.29           | 0.03    |
| Hs_12plexchip_5_4566  | v2HS_73018  | AGAACTAGACACTTAATTTGGT  | NM_001029989 | KIAA0101     | KIAA0101 (KIAA0101), transcript variant 2, mRNA                                                                                                                         | -1.30         | 0.27        | 0.01         | 0.05       | -1.31           | 0.01    |
| Hs_12plexchip_5_9831  | v2HS_230811 | TAAATGCCAAAGAGACTATCCC  | D87447       | KIAA0258     | KIAA0258                                                                                                                                                                | -1.14         | 0.30        | -0.09        | 0.22       | -1.05           | 0.01    |
| Hs_12plexchip_5_4402  | v2HS_259524 | ATCTTCAACTATAGAATGTCCC  | AB007978     | KIAA0509     | KIAA0509 PROTEIN                                                                                                                                                        | -1.67         | 0.98        | 1.27         | 1.81       | -2.94           | 0.09    |
| Hs0P00011684          | v2HS_53708  | TTCCAAAGGCACAATAACACCA  | NM_020701    | KIAA1160     | KIAA1160 PROTEIN                                                                                                                                                        | -1.92         | 0.53        | -0.89        | 0.31       | -1.04           | 0.06    |
| Hs_12plexchip_2_5631  | v2HS_184080 | AACGGTTTCGGTGCAGGGAGCC  | BC036932     | KIAA1856     | KIAA1856 PROTEIN                                                                                                                                                        | -1.69         | 0.53        | -0.60        | 0.62       | -1.09           | 0.08    |
| Hs_12plexchip_4_9195  | v2HS_78033  | ATCTTGCTTATTCAAGTGGGCG  | NM_006845    | KIF2C        | kinesin family member 2C (KIF2C), mRNA                                                                                                                                  | -1.22         | 0.33        | -0.02        | 0.30       | -1.21           | 0.01    |
| Hs_12plexchip_4_12291 | v2HS_80810  | AATGTTCAAGCAGTTCTCTCGGG | NM_022480    | KLHL25       | kelch-like 25 (Drosophila) (KLHL25), mRNA                                                                                                                               | -1.20         | 0.69        | -0.01        | 0.36       | -1.19           | 0.08    |
| Hs_12plexchip_2_4006  | v2HS_85137  | TTTGAGATTGGGATGCAGCCTG  | NM_001025231 | KPRP         | keratinocyte proline-rich protein (KPRP), mRNA                                                                                                                          | -1.52         | 0.42        | -0.36        | 0.77       | -1.16           | 0.10    |
| Hs_12plexchip_4_11729 | v2HS_169384 | TTTCTACTAGGACCATAGGCA   | NM_033360    | KRAS         | V-HA-RAS HARVEY RAT SARCOMA VIRAL ONCOGENE HOMOLOG                                                                                                                      | -2.04         | 0.53        | -0.86        | 0.70       | -1.18           | 0.09    |
| Hs_12plexchip_4_11915 | v2HS_133836 | ATGGTCCTGAAATGAGACTGGT  | NM_002278    | KRT32        | keratin 32 (KRT32), mRNA                                                                                                                                                | -2.35         | 1.31        | -0.30        | 0.44       | -2.05           | 0.10    |
| Hs_12plexchip_5_4850  | v2HS_74382  | TTAGGAGTACACTTGGGAGGGC  | NM_178438    | LCE5A        | late cornified envelope 5A (LCE5A), mRNA                                                                                                                                | -1.19         | 0.90        | 0.44         | 0.69       | -1.62           | 0.07    |
| Hs_12plexchip_5_575   | v2HS_51161  | TTATGTGATGGAATTATACCCG  | NR_003590    | LOC100101117 | testis-specific transcript, Y-linked 2-like (LOC100101117) on chromosome Y                                                                                              | -1.78         | 1.13        | 0.59         | 1.44       | -2.37           | 0.09    |
| Hs_12plexchip_5_2301  | v2HS_209586 | TTAGCATATTTCTGCAGCTACTT | XR_016217    | LOC120318    | PREDICTED:similar to 40S ribosomal protein S6 (LOC120318), mRNA                                                                                                         | -1.15         | 0.37        | 0.25         | 0.28       | -1.40           | 0.01    |
| Hs_12plexchip_5_4991  | v2HS_259415 | TTGTATTGCAATTAGTGCCT    | XR_016263    | LOC121906    | PREDICTED:similar to Proteasome subunit alpha type 6 (Proteasome iota chain) (Macropain iota chain) (Multicatalytic endopeptidase complex iota chain) (LOC121906), mRNA | -1.29         | 0.45        | 0.01         | 0.46       | -1.30           | 0.02    |
| Hs_12plexchip_6_7185  | v2HS_191934 | ATTGTAATTAGGAGCCAGTCCGA | XM_941747    | LOC130773    | PREDICTED:similar to 60S ribosomal protein L23a (LOC130773), mRNA                                                                                                       | -1.81         | 0.29        | -0.68        | 0.40       | -1.13           | 0.02    |
| Hs_12plexchip_4_3309  | v2HS_181356 | TTGAACTCAAATAAAGCAGGGC  | BX647231     | LOC148145    | HYPOTHETICAL PROTEIN LOC148145                                                                                                                                          | -1.29         | 0.16        | -0.18        | 0.53       | -1.10           | 0.06    |
| Hs_12plexchip_4_5768  | v2HS_26291  | GAACATAGTGACAGTCAAGTCA  | BC040263     | LOC150297    | HYPOTHETICAL PROTEIN LOC150297                                                                                                                                          | -1.63         | 0.49        | -0.15        | 0.60       | -1.48           | 0.03    |
| Hs_12plexchip_5_9047  | v2HS_120186 | ATTCCTGCTATAGATCGGTCCT  | NM_001014830 | LOC196913    | hypothetical protein LOC196913 (LOC196913), mRNA                                                                                                                        | -1.34         | 0.61        | 0.38         | 0.91       | -1.72           | 0.06    |
| Hs_12plexchip_4_1689  | v2HS_213536 | ATTCTGATGAATTGGCTGGGCT  | BC039539     | LOC255654    | HYPOTHETICAL PROTEIN LOC255654                                                                                                                                          | -1.25         | 0.75        | 0.89         | 0.17       | -2.14           | 0.03    |
| Hs_12plexchip_6_11076 | v2HS_182508 | TTTCTTTTCTCTTCACATCCA   | AK091446     | LOC283194    | HYPOTHETICAL PROTEIN LOC283194                                                                                                                                          | -1.27         | 0.22        | -0.25        | 0.24       | -1.02           | 0.01    |
| Hs_12plexchip_3_8982  | v2HS_131660 | TACAAATAGCACAGGAGGACCC  | XM_497352    | LOC283412    | PREDICTED:similar to 60S ribosomal protein L29 (Cell surface heparin-binding protein HIP) (LOC283412), mRNA                                                             | -1.66         | 0.17        | -0.28        | 0.77       | -1.39           | 0.08    |
| Hs0P00007920          | v2HS_142836 | TTACCCTGTCATTCTGTCTCCC  | AK092322     | LOC283575    | HYPOTHETICAL PROTEIN LOC283575                                                                                                                                          | -1.80         | 0.69        | -0.55        | 0.65       | -1.25           | 0.08    |
| Hs_12plexchip_6_11763 | v2HS_163979 | ATGCTGTAATAGTTGCTGAGCT  | AK097486     | LOC283738    | HYPOTHETICAL PROTEIN LOC283738                                                                                                                                          | -1.20         | 0.53        | 0.59         | 0.40       | -1.79           | 0.01    |
| Hs_12plexchip_5_10591 | v2HS_103411 | ATAAGTTGTGGTTCATCTGGG   | AK097672     | LOC284344    | HYPOTHETICAL PROTEIN LOC284344                                                                                                                                          | -1.53         | 0.49        | -0.10        | 0.44       | -1.43           | 0.02    |
| Hs_12plexchip_5_9148  | v2HS_103423 | ATCAGCTCTCCAGAGAACAGGC  | NR_002938    | LOC284379    | solute carrier family 7 (cationic amino acid transporter, y+ system), member 3 pseudogene (LOC284379) on chromosome 19                                                  | -1.13         | 0.23        | 0.00         | 0.22       | -1.14           | 0.00    |
| Hs_12plexchip_6_2724  | v2HS_182880 | TTTAATCGCGAGACAATACGGG  | AK094324     | LOC284408    | HYPOTHETICAL PROTEIN LOC284408                                                                                                                                          | -1.27         | 0.83        | 0.25         | 0.44       | -1.52           | 0.07    |
| Hs_12plexchip_2_9250  | v2HS_21776  | TTAAGGCAACAATAGTGTCTGT  | XM_373030    | LOC285556    | PREDICTED:hypothetical protein LOC285556 (LOC285556), mRNA                                                                                                              | -1.08         | 0.60        | 0.21         | 0.60       | -1.30           | 0.06    |
| Hs_12plexchip_4_1442  | v2HS_213268 | ATGGTGAATGATCTTAGCGGTG  | XM_291007    | LOC339766    | PREDICTED:hypothetical protein LOC339766 (LOC339766), mRNA                                                                                                              | -1.10         | 0.51        | -0.02        | 0.10       | -1.08           | 0.06    |
| Hs_12plexchip_6_6813  | v2HS_285588 | TTACCACAACAATATGTACCCA  | NM_207376    | LOC387882    | HYPOTHETICAL PROTEIN                                                                                                                                                    | -1.58         | 0.56        | 0.38         | 0.73       | -1.97           | 0.02    |

| Probe ID              | v2HS        | Sequence               | Accession    | Symbol    | Gene Name                                                                                                                                                                                                                           | Mut log2 mean | Mut log2 SD | WT log2 Mean | WT log2 SD | log2 difference | P-value |
|-----------------------|-------------|------------------------|--------------|-----------|-------------------------------------------------------------------------------------------------------------------------------------------------------------------------------------------------------------------------------------|---------------|-------------|--------------|------------|-----------------|---------|
| Hs_12plexchip_3_11361 | v2HS_237760 | TAAGTGGTAATGCTTCATACCA | NM_001089587 | LOC389435 | hCG21078 (LOC389435), mRNA                                                                                                                                                                                                          | -1.44         | 0.08        | -0.34        | 0.25       | -1.10           | 0.01    |
| Hs_12plexchip_6_11984 | v2HS_192962 | TTTATCTGGAATTCCAAGGCT  | XR_018253    | LOC401197 | PREDICTED:similar to ribosomal protein L7-like 1 (LOC401197), mRNA                                                                                                                                                                  | -2.15         | 0.28        | -0.45        | 0.16       | -1.71           | 0.00    |
| Hs_12plexchip_6_12168 | v2HS_165316 | ATCAACTTTCTGGAATCTGGG  | XM_496697    | LOC441018 | PREDICTED:similar to UDP-glucuronosyltransferase 2B7 precursor (UDPGT) (3,4-catechol estrogen specific) (UDPGT-2) (LOC441018), mRNA                                                                                                 | -1.23         | 0.34        | 0.26         | 0.22       | -1.49           | 0.01    |
| Hs0P00011576          | v2HS_188312 | TTAATAACTGTGAGAACATGGG | NR_003536    | LOC441246 | hCG1983332 (LOC441246) on chromosome 7                                                                                                                                                                                              | -1.95         | 0.10        | -0.75        | 0.66       | -1.20           | 0.08    |
| Hs_12plexchip_5_11559 | v2HS_144280 | TAGTTGCTACAAGGACCATGGT | XM_927548    | LOC644402 | PREDICTED:hypothetical LOC644402 (LOC644402), mRNA                                                                                                                                                                                  | -1.05         | 0.19        | 0.44         | 0.28       | -1.49           | 0.00    |
| Hs_12plexchip_2_10359 | v2HS_32694  | ATTAATAAGTGCTGTCAGACCA | XM_927812    | LOC644717 | PREDICTED:similar to sarcoma antigen 1 (LOC644717), mRNA                                                                                                                                                                            | -1.41         | 0.45        | -0.34        | 0.13       | -1.07           | 0.05    |
| Hs_12plexchip_6_6067  | v2HS_190051 | ATGCATACAGTGAGCCGCAGCC | XM_928136    | LOC645100 | PREDICTED:similar to CG11699-PA (LOC645100), mRNA                                                                                                                                                                                   | -1.28         | 0.57        | 0.54         | 1.07       | -1.82           | 0.08    |
| Hs_12plexchip_6_12808 | v2HS_193874 | ATCTTGGACAAGTTTAGTCCA  | XR_016831    | LOC645808 | PREDICTED:similar to 60 kDa heat shock protein, mitochondrial precursor (Hsp60) (60 kDa chaperonin) (CPN60) (Heat shock protein 60) (HSP-60) (Mitochondrial matrix protein P1) (P60 lymphocyte protein) (HuCHA60) (LOC645808), mRNA | -2.30         | 0.91        | -0.22        | 1.24       | -2.08           | 0.08    |
| Hs_12plexchip_6_2822  | v2HS_184074 | TTTCTTCACTCTCTGTACGCC  | XM_935722    | LOC646762 | PREDICTED:hypothetical protein LOC646762 (LOC646762), mRNA                                                                                                                                                                          | -1.56         | 0.62        | -0.12        | 0.31       | -1.44           | 0.04    |
| Hs_12plexchip_3_11479 | v2HS_233964 | AATTCTTGACATGGTTTCT    | XR_017618    | LOC647039 | PREDICTED:similar to Death domain-containing protein CRADD (Caspase and RIP adapter with death domain) (RIP-associated protein with a death domain) (LOC647039), mRNA                                                               | -1.08         | 0.46        | 0.41         | 0.48       | -1.49           | 0.02    |
| Hs_12plexchip_3_8689  | v2HS_101886 | AATTCTACCCAATCTCTAGCCA | XR_018477    | LOC648987 | PREDICTED:hypothetical LOC648987 (LOC648987), mRNA                                                                                                                                                                                  | -1.52         | 0.32        | 0.11         | 0.27       | -1.64           | 0.00    |
| Hs_12plexchip_5_7718  | v2HS_121873 | TTCATGGTGGACATTCTAAGGT | XM_940582    | LOC651430 | PREDICTED:hypothetical LOC651430 (LOC651430), mRNA                                                                                                                                                                                  | -1.44         | 0.34        | -0.44        | 0.34       | -1.00           | 0.02    |
| Hs_12plexchip_3_12580 | v2HS_242292 | TTAATCTTGAACCTTGGAGGCT | XR_019381    | LOC652549 | PREDICTED:similar to SNW domain-containing protein 1 (Nuclear protein SkiP) (Ski-interacting protein) (Nuclear receptor coactivator NCoA-62) (LOC652549), mRNA                                                                      | -1.51         | 0.44        | -0.11        | 0.35       | -1.39           | 0.01    |
| Hs_12plexchip_4_1504  | v2HS_205865 | TTATTGAAGAAACCAATCCTGG | XM_942509    | LOC652826 | PREDICTED:similar to 265 protease regulatory subunit 6B (MIP224) (MB67-interacting protein) (TAT-binding protein 7) (TBP-7) (LOC652826), mRNA                                                                                       | -1.94         | 0.18        | -0.93        | 0.52       | -1.01           | 0.06    |
| Hs_12plexchip_5_634   | v2HS_41661  | TAAGGACTCCGAAGAACTGGT  | XM_001131663 | LOC729890 | PREDICTED:hypothetical protein LOC729890 (LOC729890), mRNA                                                                                                                                                                          | -1.64         | 0.48        | 0.06         | 0.65       | -1.70           | 0.03    |
| Hs_12plexchip_5_5556  | v2HS_117690 | TTTATTGCAGGTCCAACCGGG  | XM_001132025 | LOC730000 | PREDICTED:similar to testis-specific serine kinase 6 (LOC730000), mRNA                                                                                                                                                              | -1.35         | 0.42        | -0.24        | 0.57       | -1.10           | 0.06    |
| Hs_12plexchip_5_3665  | v2HS_254576 | ATAATGAGTAACCTCAGAAGGC | XM_001124597 | LOC730411 | PREDICTED:similar to zinc finger and BTB domain containing 8 (LOC730411), mRNA                                                                                                                                                      | -1.10         | 0.24        | 1.08         | 0.08       | -2.18           | 0.00    |
| Hs_12plexchip_6_12384 | v2HS_142522 | TTATTGAGGAGCTCATGAGCT  | NM_201550    | LRRC10    | LEUCINE RICH REPEAT CONTAINING 10                                                                                                                                                                                                   | -1.80         | 1.01        | -0.15        | 0.49       | -1.65           | 0.09    |
| Hs_12plexchip_5_1241  | v2HS_247143 | TTATACAAAGAGTTGGTCCCGA | NM_005512    | LRRC32    | leucine rich repeat containing 32 (LRRC32), mRNA                                                                                                                                                                                    | -1.54         | 0.08        | 0.47         | 0.94       | -2.01           | 0.06    |
| Hs_12plexchip_3_420   | v2HS_50487  | TTTCCTTATCACTTTCATCAC  | NM_012322    | LSM5      | LSM5 homolog, U6 small nuclear RNA associated ( <i>S. cerevisiae</i> ) (LSM5), mRNA                                                                                                                                                 | -1.92         | 0.85        | -0.01        | 0.35       | -1.92           | 0.04    |
| Hs_12plexchip_4_12292 | v2HS_151587 | TATAACCTTCAAGCACTGGCA  | NM_030583    | MATN2     | matrilin 2 (MATN2), transcript variant 2, mRNA                                                                                                                                                                                      | -1.50         | 0.68        | -0.40        | 0.27       | -1.10           | 0.09    |
| Hs_12plexchip_3_2395  | v2HS_69010  | ATGAACTACCAGATGCAGGTTG | NM_024596    | MCPH1     | microcephalin 1 (MCPH1), mRNA                                                                                                                                                                                                       | -1.43         | 0.56        | -0.42        | 0.16       | -1.01           | 0.08    |
| Hs_12plexchip_6_903   | v2HS_197525 | ATCCAAATCTTCACTTGCC    | NM_006838    | METAP2    | methionyl aminopeptidase 2 (METAP2), mRNA                                                                                                                                                                                           | -2.36         | 0.32        | -0.37        | 0.75       | -1.98           | 0.03    |
| Hs_12plexchip_5_3248  | v2HS_49368  | TTCCTGTCATTGATTATATGCT | NM_001098624 | MID1      | midline 1 (Opitz/BBB syndrome) (MID1), transcript variant 4, mRNA                                                                                                                                                                   | -2.07         | 0.41        | -0.74        | 0.51       | -1.33           | 0.03    |
| Hs_12plexchip_5_1542  | v2HS_249839 | ATAGCAAAGGATCCATCAGGA  | NM_005439    | MLF2      | myeloid leukemia factor 2 (MLF2), mRNA                                                                                                                                                                                              | -1.44         | 0.51        | -0.02        | 0.30       | -1.42           | 0.02    |
| Hs_12plexchip_2_12570 | v2HS_198375 | TATTGGTTTGCGAATAAGACCT | NM_005933    | MLL       | myeloid/lymphoid or mixed-lineage leukemia (trithorax homolog, <i>Drosophila</i> ) (MLL), mRNA                                                                                                                                      | -1.30         | 0.53        | -0.24        | 0.44       | -1.06           | 0.06    |



| Probe ID              | v2HS        | Sequence               | Accession    | Symbol   | Gene Name                                                                                                             | Mut log2 mean | Mut log2 SD | WT log2 Mean | WT log2 SD | log2 difference | P-value |
|-----------------------|-------------|------------------------|--------------|----------|-----------------------------------------------------------------------------------------------------------------------|---------------|-------------|--------------|------------|-----------------|---------|
| Hs_12plexchip_6_1814  | v2HS_117180 | ATACTGTAGAACATGACATCCT | NM_031415    | MLZE     | melanoma-derived leucine zipper, extra-nuclear factor (MLZE), mRNA                                                    | -1.52         | 1.05        | 1.12         | 1.25       | -2.64           | 0.05    |
| Hs_12plexchip_4_7836  | v2HS_151873 | TTAACATTCAATGGTCTTCTCT | NM_002432    | MNDA     | myeloid cell nuclear differentiation antigen (MNDA), mRNA                                                             | -1.04         | 0.47        | 0.04         | 0.63       | -1.08           | 0.08    |
| Hs_12plexchip_5_1540  | v2HS_54255  | TTTCGGAAGAACGGAAGAAGCA | NM_130807    | MOBK12A  | MOB1, Mps One Binder kinase activator-like 2A (yeast) (MOBK12A), mRNA                                                 | -1.55         | 0.13        | -0.32        | 0.52       | -1.23           | 0.05    |
| Hs_12plexchip_5_11551 | v2HS_272336 | TTGTATTCCTGGTTCTTATGGC | NM_032332    | MORG1    | mitogen-activated protein kinase organizer 1 (MORG1), transcript variant 2, mRNA                                      | -1.52         | 0.40        | -0.18        | 0.49       | -1.33           | 0.02    |
| Hs0P00010208          | v2HS_16945  | TTCTTCCATCATGCTCAACGGC | NM_003829    | MPDZ     | multiple PDZ domain protein (MPDZ), mRNA                                                                              | -2.39         | 0.93        | -0.95        | 0.49       | -1.44           | 0.10    |
| Hs_12plexchip_6_9149  | v2HS_237290 | GTGATGGCTCTCTTAGAGGCG  | NM_145213    | MRPL30   | mitochondrial ribosomal protein L30 (MRPL30), nuclear gene encoding mitochondrial protein, transcript variant 3, mRNA | -2.60         | 0.11        | -0.29        | 0.30       | -2.31           | 0.00    |
| Hs0P00002853          | v2HS_62393  | CTAGAATTTGAATTGCTGAGCC | BG327319     | MRPL49   | MITOCHONDRIAL RIBOSOMAL PROTEIN L49                                                                                   | -1.40         | 0.45        | 0.28         | 0.37       | -1.68           | 0.01    |
| Hs_12plexchip_3_2049  | v2HS_61946  | AATGCAGAATCGTGAGATGGT  | AY135343     | MRPS36P4 | MITOCHONDRIAL RIBOSOMAL PROTEIN S36 PSEUDOGENE 4                                                                      | -1.87         | 0.65        | -0.62        | 0.45       | -1.25           | 0.06    |
| Hs_12plexchip_4_1019  | v2HS_196467 | TTAACAAATGGACTATTGGAC  | NM_001006635 | MTX2     | metaxin 2 (MTX2), transcript variant 2, mRNA                                                                          | -2.45         | 0.72        | -0.35        | 0.30       | -2.09           | 0.02    |
| Hs_12plexchip_3_769   | v2HS_50240  | ATGAGGGTGTGATTCAGGCCCA | NM_005115    | MVP      | major vault protein (MVP), transcript variant 2, mRNA                                                                 | -1.22         | 0.17        | -0.22        | 0.58       | -1.00           | 0.09    |
| Hs_12plexchip_5_3585  | v2HS_71122  | TAAGCTACTCTTAATTTGGGC  | NM_013262    | MYLIP    | myosin regulatory light chain interacting protein (MYLIP), mRNA                                                       | -2.03         | 1.07        | 0.98         | 1.43       | -3.01           | 0.05    |
| Hs_12plexchip_2_2845  | v2HS_83390  | ATTTCAACCGACTGATTGCGG  | NM_023018    | NADK     | NAD kinase (NADK), mRNA                                                                                               | -1.27         | 0.43        | -0.08        | 0.39       | -1.20           | 0.02    |
| Hs_12plexchip_4_6500  | v2HS_66759  | GTAGAATATCACGCAGCGAGGG | NM_153006    | NAGS     | N-acetylglutamate synthase (NAGS), mRNA                                                                               | -1.70         | 0.44        | -0.64        | 0.22       | -1.05           | 0.03    |
| Hs_12plexchip_6_11820 | v2HS_121992 | TTATACTCATAGTCCTCAACT  | XR_017910    | NAP1L6   | PREDICTED:nucleosome assembly protein 1-like 6 (NAP1L6), misc RNA                                                     | -1.63         | 0.07        | -0.11        | 0.55       | -1.51           | 0.04    |
| Hs_12plexchip_5_11516 | v2HS_272934 | TTTATTGATGCTTTATAAGCC  | NM_057175    | NARG1    | NMDA receptor regulated 1 (NARG1), mRNA                                                                               | -1.63         | 0.19        | 0.32         | 0.02       | -1.95           | 0.00    |
| Hs_12plexchip_5_9142  | v2HS_267506 | TTAAATTTAGAGGCTCCCTGGA | NM_014903    | NAV3     | neuron navigator 3 (NAV3), mRNA                                                                                       | -1.65         | 0.67        | -0.36        | 0.61       | -1.29           | 0.07    |
| Hs_12plexchip_6_9437  | v2HS_250396 | AATAGGTAGCGATTCTGACCTT | NR_003108    | NBR2     | neighbor of BRCA1 gene 2 (NBR2) on chromosome 17                                                                      | -1.20         | 0.50        | -0.01        | 0.40       | -1.19           | 0.04    |
| Hs_12plexchip_6_1620  | v2HS_95758  | ATTGCTCCCAACAATTTCTGGC | NM_014865    | NCAPD2   | non-SMC condensin I complex, subunit D2 (NCAPD2), mRNA                                                                | -1.08         | 0.56        | 1.18         | 0.64       | -2.27           | 0.01    |
| Hs_12plexchip_6_8471  | v2HS_36645  | TTTCTAGTCATACCAATTTCTG | NM_005381    | NCL      | nucleolin (NCL), mRNA                                                                                                 | -2.38         | 0.99        | -0.74        | 0.66       | -1.64           | 0.08    |
| Hs_12plexchip_4_6295  | v2HS_20571  | CTAAATGTTGACGGTCTTGCC  | NM_005002    | NDUFA9   | NADH dehydrogenase (ubiquinone) 1 alpha subcomplex, 9, 39kDa (NDUFA9), mRNA                                           | -1.56         | 0.82        | 0.09         | 0.73       | -1.65           | 0.06    |
| Hs_12plexchip_5_6456  | v2HS_262163 | TTTATTCTTTCAACCTTCTCT  | NM_012224    | NEK1     | NIMA (never in mitosis gene a)-related kinase 1 (NEK1), mRNA                                                          | -1.33         | 0.55        | -0.14        | 0.24       | -1.19           | 0.05    |
| Hs_12plexchip_5_5442  | v2HS_260806 | TTAAGTAATGCGATATTGAGCA | NM_000267    | NF1      | neurofibromin 1 (neurofibromatosis, von Recklinghausen disease, Watson disease) (NF1), transcript variant 2, mRNA     | -1.23         | 0.12        | 2.30         | 0.39       | -3.53           | 0.00    |
| Hs_12plexchip_3_8465  | v2HS_98549  | TTAGCGATCCATTCATTACCA  | NM_022787    | NMNAT1   | nicotinamide nucleotide adenyltransferase 1 (NMNAT1), mRNA                                                            | -1.38         | 0.24        | -0.32        | 0.46       | -1.06           | 0.04    |
| Hs0P00010705          | v2HS_47052  | TTCACTCCAGCGGTACTGGGC  | NM_003946    | NOL3     | nucleolar protein 3 (apoptosis repressor with CARD domain) (NOL3), mRNA                                               | -1.44         | 0.40        | 0.18         | 0.54       | -1.62           | 0.02    |
| Hs_12plexchip_5_3215  | v2HS_253869 | ATTAACTTAACCTTGGCACGG  | NM_006392    | NOL5A    | nucleolar protein 5A (56kDa with KKE/D repeat) (NOL5A), mRNA                                                          | -2.61         | 0.66        | -0.98        | 0.15       | -1.63           | 0.04    |
| Hs_12plexchip_3_11626 | v2HS_174662 | TTTCAGATTCATTTATTGAGGG | NM_017948    | NOL8     | nucleolar protein 8 (NOL8), mRNA                                                                                      | -1.09         | 0.42        | 0.38         | 0.10       | -1.47           | 0.02    |
| Hs_12plexchip_4_6028  | v2HS_30849  | TTTCTCAGCGTATAGACTCGA  | NM_018648    | NOLA3    | nucleolar protein family A, member 3 (H/ACA small nucleolar RNPs) (NOLA3), mRNA                                       | -1.04         | 0.27        | 0.24         | 0.81       | -1.27           | 0.10    |
| Hs_12plexchip_4_5492  | v2HS_25500  | ATCTTCTATGGGTTTGTGGCAC | NG_000886    | NPM1P13  | NUCLEOPHOSMIN 1 (NUCLEOLAR PHOSPHOPROTEIN B23, NUMATRIN) PSEUDOGENE 13                                                | -1.76         | 0.41        | -0.69        | 0.37       | -1.07           | 0.03    |
| Hs_12plexchip_6_9954  | v2HS_131222 | ATGCAATTTAGGAGCAAAAGCT | NM_000904    | NQO2     | NAD(P)H dehydrogenase, quinone 2 (NQO2), mRNA                                                                         | -1.40         | 0.95        | 0.34         | 0.58       | -1.74           | 0.07    |
| Hs_12plexchip_5_7176  | v2HS_61886  | ACTTAGTAGGCGAGTGTCCGGG | NM_004959    | NR5A1    | nuclear receptor subfamily 5, group A, member 1 (NR5A1), mRNA                                                         | -1.10         | 0.61        | 0.71         | 0.15       | -1.81           | 0.03    |
| Hs_12plexchip_5_11467 | v2HS_139799 | TATTCCAATGACTGCCAGAGGG | NM_015135    | NUP205   | nucleoporin 205kDa (NUP205), mRNA                                                                                     | -2.67         | 1.05        | -0.52        | 0.26       | -2.15           | 0.06    |
| Hs_12plexchip_5_4320  | v2HS_79283  | TTCTTGAGTAAAGTCAAGGGCG | NM_014669    | NUP93    | NUCLEOPORIN 93KDA                                                                                                     | -1.91         | 0.67        | -0.22        | 0.67       | -1.69           | 0.04    |
| Hs_12plexchip_5_12758 | v2HS_197810 | TTTCTTTGAGGGAAATTAACGC | NM_006362    | NXF1     | nuclear RNA export factor 1 (NXF1), transcript variant 1, mRNA                                                        | -1.64         | 0.36        | -0.33        | 0.46       | -1.30           | 0.02    |
| Hs_12plexchip_6_8498  | v2HS_91268  | ATTAGTATTCATAACAACTGCT | NM_007280    | OIP5     | Opa interacting protein 5 (OIP5), mRNA                                                                                | -1.46         | 0.59        | -0.10        | 0.74       | -1.36           | 0.07    |

| Probe ID              | v2HS        | Sequence                | Accession    | Symbol  | Gene Name                                                                                      | Mut log2 mean | Mut log2 SD | WT log2 Mean | WT log2 SD | log2 difference | P-value |
|-----------------------|-------------|-------------------------|--------------|---------|------------------------------------------------------------------------------------------------|---------------|-------------|--------------|------------|-----------------|---------|
| Hs_12plexchip_5_12900 | v2HS_198794 | TTTGACAGATTAATCTCTCAGCA | NM_007160    | OR2H2   | olfactory receptor, family 2, subfamily H, member 2 (OR2H2), mRNA                              | -2.22         | 0.77        | -0.92        | 0.70       | -1.30           | 0.10    |
| Hs_12plexchip_5_11676 | v2HS_273833 | TTCGTTAGGGTCATAATTCCA   | NM_001004063 | OR4K1   | olfactory receptor, family 4, subfamily K, member 1 (OR4K1), mRNA                              | -1.37         | 0.23        | -0.30        | 0.16       | -1.07           | 0.00    |
| Hs_12plexchip_5_10876 | v2HS_274419 | TTAGACTATTTCCCGAGCTGCT  | NM_024586    | OSBPL9  | oxysterol binding protein-like 9 (OSBPL9), transcript variant 6, mRNA                          | -1.01         | 0.10        | 0.06         | 0.51       | -1.07           | 0.06    |
| Hs_12plexchip_5_8998  | v2HS_98327  | TTAGTTGTGCCATAGACCAGGT  | NM_022750    | PARP12  | poly (ADP-ribose) polymerase family, member 12 (PARP12), mRNA                                  | -1.10         | 0.43        | -0.07        | 0.38       | -1.03           | 0.04    |
| Hs_12plexchip_5_3785  | v2HS_75540  | TTCTTCTACTATTGTGAGGA    | NM_016483    | PHF7    | PHD finger protein 7 (PHF7), transcript variant 1, mRNA                                        | -1.02         | 0.75        | 1.05         | 1.23       | -2.07           | 0.08    |
| Hs_12plexchip_4_2383  | v2HS_169417 | TTTATGTGAAAGTTAAAGCCCA  | NG_001173    | PHKBP2  | PHOSPHORYLASE KINASE, BETA PSEUDOGENE 2                                                        | -1.10         | 0.84        | 1.53         | 0.68       | -2.63           | 0.01    |
| Hs_12plexchip_4_9658  | v2HS_58415  | ATAAATACTGTGTGACGGTGGC  | NM_006221    | PIN1    | protein (peptidylprolyl cis/trans isomerase) NIMA-interacting 1 (PIN1), mRNA                   | -1.13         | 0.51        | 1.00         | 1.00       | -2.13           | 0.05    |
| Hs_12plexchip_5_6616  | v2HS_234804 | ATTCAGTTCAGGACACATACGT  | NM_032409    | PINK1   | PTEN induced putative kinase 1 (PINK1), nuclear gene encoding mitochondrial protein, mRNA      | -1.13         | 0.43        | -0.01        | 0.67       | -1.11           | 0.08    |
| Hs0P00011923          | v2HS_19861  | TTAAACTTGAATGGCTCGGCA   | NM_005028    | PIP4K2A | phosphatidylinositol-5-phosphate 4-kinase, type II, alpha (PIP4K2A), mRNA                      | -1.04         | 0.65        | 0.23         | 0.19       | -1.26           | 0.07    |
| Hs_12plexchip_5_10351 | v2HS_92232  | ATTCACCAAATCCCATGGGCC   | NM_000300    | PLA2G2A | phospholipase A2, group IIA (platelets, synovial fluid) (PLA2G2A), mRNA                        | -1.42         | 0.32        | 0.38         | 0.17       | -1.79           | 0.00    |
| Hs0P00000426          | v2HS_19708  | TGTAATTAGGAGTCCCACACAG  | NM_005030    | PLK1    | POLO-LIKE KINASE 1 (DROSOPHILA)                                                                | -1.75         | 0.22        | -0.35        | 0.10       | -1.41           | 0.00    |
| Hs_12plexchip_5_9437  | v2HS_267706 | AACATACAGATCTAGTGCCT    | NM_004650    | PNPLA4  | patatin-like phospholipase domain containing 4 (PNPLA4), mRNA                                  | -1.23         | 0.21        | 0.08         | 0.37       | -1.31           | 0.01    |
| Hs_12plexchip_6_1230  | v2HS_154166 | TAATGATGAAGCTAAATGGG    | NM_016937    | POLA1   | polymerase (DNA directed), alpha 1 (POLA1), mRNA                                               | -2.90         | 0.61        | -0.06        | 0.35       | -2.84           | 0.00    |
| Hs_12plexchip_4_486   | v2HS_70473  | AATGAGACACTGCACATCAGGG  | NM_013284    | POLM    | polymerase (DNA directed), mu (POLM), mRNA                                                     | -1.98         | 0.77        | -0.04        | 0.28       | -1.94           | 0.04    |
| Hs_12plexchip_6_27    | v2HS_155605 | TTTATATACAAGGCAACGCCCA  | NM_018082    | POLR3B  | polymerase (RNA III) (DNA directed) polypeptide B (POLR3B), mRNA                               | -2.67         | 0.28        | -0.95        | 0.96       | -1.72           | 0.08    |
| Hs_12plexchip_4_475   | v2HS_201722 | AATACATTTGAGTTAAAGAGTG  | NM_006466    | POLR3F  | polymerase (RNA III) (DNA directed) polypeptide F, 39 kDa (POLR3F), mRNA                       | -2.61         | 0.59        | 0.64         | 0.29       | -3.25           | 0.00    |
| Hs_12plexchip_5_10139 | v2HS_229159 | TAATCACTCTATTTCAAGTGG   | NM_001018161 | PON2    | paraoxonase 2 (PON2), transcript variant 2, mRNA                                               | -2.19         | 0.72        | -0.67        | 0.66       | -1.52           | 0.06    |
| Hs0P00002401          | v2HS_170331 | ATGTTTCTAACTTTGTCTCTCT  | NM_002713    | PPP1R8  | PROTEIN PHOSPHATASE 1, REGULATORY (INHIBITOR) SUBUNIT 8                                        | -1.45         | 0.70        | 0.02         | 0.59       | -1.47           | 0.05    |
| Hs_12plexchip_5_12847 | v2HS_71819  | TTGTTCTATAGGAAGGACTCGT  | NM_006017    | PROM1   | prominin 1 (PROM1), mRNA                                                                       | -1.26         | 0.24        | -0.11        | 0.49       | -1.15           | 0.04    |
| Hs_12plexchip_5_6793  | v2HS_89936  | TAATAATGTAAGGCACAAACCA  | NM_000021    | PSEN1   | presenilin 1 (Alzheimer disease 3) (PSEN1), mRNA                                               | -2.71         | 0.49        | -0.31        | 0.86       | -2.39           | 0.02    |
| Hs_12plexchip_6_755   | v2HS_159974 | TTTCTCTTGCTCCACATATGCC  | NM_033126    | PSKH2   | protein serine kinase H2 (PSKH2), mRNA                                                         | -1.34         | 0.83        | 0.09         | 0.77       | -1.42           | 0.10    |
| Hs_12plexchip_4_2478  | v2HS_221829 | TTCTCTCTCCACAGCTAGGCA   | NM_002790    | PSMA5   | proteasome (prosome, macropain) subunit, alpha type, 5 (PSMA5), mRNA                           | -1.84         | 0.37        | -0.33        | 0.55       | -1.51           | 0.02    |
| Hs_12plexchip_4_3837  | v2HS_170736 | TATAAATAGGATGGAGGATGGG  | NM_002797    | PSMB5   | proteasome (prosome, macropain) subunit, beta type, 5 (PSMB5), mRNA                            | -2.15         | 0.49        | 0.66         | 0.27       | -2.81           | 0.00    |
| Hs_12plexchip_2_6001  | v2HS_170743 | ATTGCATACTAGAATCCCAGGA  | NM_002798    | PSMB6   | proteasome (prosome, macropain) subunit, beta type, 6 (PSMB6), mRNA                            | -1.58         | 0.78        | 0.30         | 0.65       | -1.88           | 0.03    |
| Hs_12plexchip_4_8198  | v2HS_170848 | AATTAATCGAAGTTTGATAGGA  | NM_002816    | PSMD12  | proteasome (prosome, macropain) 26S subunit, non-ATPase, 12 (PSMD12), mRNA                     | -2.60         | 0.22        | -0.78        | 0.32       | -1.82           | 0.00    |
| Hs_12plexchip_4_3920  | v2HS_170902 | TTTGTCTTAGGAAGCTTGCC    | NM_002827    | PTPN1   | protein tyrosine phosphatase, non-receptor type 1 (PTPN1), mRNA                                | -1.34         | 0.30        | -0.25        | 0.24       | -1.08           | 0.01    |
| Hs_12plexchip_6_10419 | v2HS_19130  | AATAGTCAGACGCATATGTGAC  | NM_005051    | QARS    | glutaminyl-tRNA synthetase (QARS), mRNA                                                        | -2.33         | 0.50        | 1.14         | 1.42       | -3.47           | 0.04    |
| Hs_12plexchip_5_3595  | v2HS_255132 | ATGAAACTGAACAGTGGATCGT  | NM_015436    | RCHY1   | ring finger and CHY zinc finger domain containing 1 (RCHY1), transcript variant 1, mRNA        | -1.35         | 1.05        | 1.41         | 1.37       | -2.76           | 0.05    |
| Hs_12plexchip_4_5435  | v2HS_19386  | TATAAACATTATCAATTGCCCA  | NM_173054    | RELN    | reelin (RELN), transcript variant 2, mRNA                                                      | -1.31         | 0.47        | 1.81         | 1.94       | -3.13           | 0.10    |
| Hs_12plexchip_4_7588  | v2HS_191440 | AATTGGGTGATGAGTTCCGGT   | NM_032491    | RFX4    | regulatory factor X, 4 (influences HLA class II expression) (RFX4), transcript variant 1, mRNA | -2.14         | 0.69        | -0.64        | 0.41       | -1.50           | 0.04    |
| Hs_12plexchip_4_2121  | v2HS_219058 | TAGTAAATAAACACTGCCAGCT  | NM_017821    | RHBDL2  | rhomboid, veinlet-like 2 (Drosophila) (RHBDL2), mRNA                                           | -1.84         | 1.15        | 1.80         | 1.29       | -3.64           | 0.02    |

| Probe ID              | v2HS        | Sequence                | Accession    | Symbol   | Gene Name                                                                                           | Mut log2 mean | Mut log2 SD | WT log2 Mean | WT log2 SD | log2 difference | P-value |
|-----------------------|-------------|-------------------------|--------------|----------|-----------------------------------------------------------------------------------------------------|---------------|-------------|--------------|------------|-----------------|---------|
| Hs_12plexchip_5_10250 | v2HS_96371  | TTTCTCCATGAATATGTCGCCT  | NM_014989    | RIMS1    | regulating synaptic membrane exocytosis 1 (RIMS1), mRNA                                             | -1.32         | 0.67        | 0.04         | 0.54       | -1.37           | 0.05    |
| Hs_12plexchip_4_9499  | v2HS_43940  | TATCTGCATCAAATACTGAGCT  | NM_012421    | RLF      | rearranged L-myc fusion (RLF), mRNA                                                                 | -1.25         | 0.77        | 0.03         | 0.71       | -1.28           | 0.10    |
| HsOP00005031          | v2HS_95298  | TATTCATCACAAATTAACAGCCT | NM_014771    | RNF40    | RING FINGER PROTEIN 40                                                                              | -1.09         | 0.54        | 0.21         | 0.64       | -1.31           | 0.06    |
| Hs_12plexchip_2_10249 | v2HS_32164  | TTTAAGAAGAGAAACTCCTGAG  | NM_002946    | RPA2     | replication protein A2, 32kDa (RPA2), mRNA                                                          | -2.15         | 1.08        | -0.24        | 0.96       | -1.92           | 0.08    |
| Hs_12plexchip_5_1217  | v2HS_69321  | ATAAGCCAAACCAGTGTCACT   | NM_005444    | RQCD1    | RCD1 required for cell differentiation1 homolog (S. pombe) (RQCD1), mRNA                            | -1.95         | 0.39        | -0.07        | 0.57       | -1.88           | 0.01    |
| Hs_12plexchip_5_12841 | v2HS_37141  | AAGGAGGATAAGAGTGTGACGGA | NM_004704    | RRP9     | RRP9, small subunit (SSU) processome component, homolog (yeast) (RRP9), mRNA                        | -2.38         | 0.32        | -0.45        | 1.07       | -1.93           | 0.08    |
| Hs_12plexchip_4_10907 | v2HS_87174  | TAAGTCTTAACTCCAAGTC     | NM_015169    | RRS1     | RRS1 ribosome biogenesis regulator homolog (S. cerevisiae) (RRS1), mRNA                             | -2.08         | 0.37        | -0.33        | 0.14       | -1.75           | 0.01    |
| Hs_12plexchip_4_11123 | v2HS_175228 | TTTAAGCCTTATATGCCAGGCT  | NM_018364    | RSBN1    | round spermatid basic protein 1 (RSBN1), mRNA                                                       | -1.52         | 0.56        | 0.13         | 0.34       | -1.65           | 0.02    |
| HsOP00000698          | v2HS_56938  | TTCGGCTTTGGCTTTGGATCCG  | NM_206900    | RTN2     | reticulum 2 (RTN2), transcript variant 2, mRNA                                                      | -1.84         | 0.83        | -0.18        | 0.83       | -1.66           | 0.07    |
| HsOP00004961          | v2HS_64402  | TTAACTATGACATCCCTGGAG   | NM_005500    | SAE1     | SUMO-1 ACTIVATING ENZYME SUBUNIT 1                                                                  | -1.68         | 0.14        | -0.44        | 0.22       | -1.25           | 0.00    |
| Hs_12plexchip_5_4162  | v2HS_259547 | TTCCTCCAGTGTGATTAATAGCT | NM_006642    | SDCCAG8  | serologically defined colon cancer antigen 8 (SDCCAG8), mRNA                                        | -1.21         | 0.40        | 0.09         | 0.74       | -1.30           | 0.07    |
| Hs_12plexchip_3_3370  | v2HS_41405  | ATTCCACTGGTGTGATGAGCC   | NM_174975    | SEC14L3  | SEC14-like 3 (S. cerevisiae) (SEC14L3), mRNA                                                        | -1.55         | 0.51        | -0.26        | 0.11       | -1.29           | 0.04    |
| Hs_12plexchip_6_3896  | v2HS_169968 | AATTGAGTGTGTGATCTGACCT  | NM_002639    | SERPINB5 | serpin peptidase inhibitor, clade B (ovalbumin), member 5 (SERPINB5), mRNA                          | -1.48         | 0.60        | -0.13        | 0.59       | -1.35           | 0.05    |
| Hs_12plexchip_6_8658  | v2HS_68216  | TACCAATAGCAGGTGAAGGGCG  | NM_005490    | SH2D3A   | SH2 domain containing 3A (SH2D3A), mRNA                                                             | -1.30         | 0.52        | 0.02         | 0.85       | -1.32           | 0.10    |
| Hs_12plexchip_5_11115 | v2HS_141439 | TTCATCAATTGGTATCAGGCGT  | NM_001017995 | SH3PXD2B | SH3 and PX domains 2B (SH3PXD2B), mRNA                                                              | -1.38         | 0.13        | 0.75         | 0.19       | -2.13           | 0.00    |
| HsOP00010492          | v2HS_33286  | ATTATCTCCCAGACATGTGCA   | NM_006304    | SHFM1    | split hand/foot malformation (ectrodactyly) type 1 (SHFM1), mRNA                                    | -1.61         | 0.21        | -0.46        | 0.48       | -1.15           | 0.04    |
| Hs_12plexchip_3_6246  | v2HS_111725 | TTAGAGATGCTTACCGTATGCC  | NM_000617    | SLC11A2  | solute carrier family 11 (proton-coupled divalent metal ion transporters), member 2 (SLC11A2), mRNA | -1.76         | 0.47        | -0.61        | 0.60       | -1.15           | 0.06    |
| Hs_12plexchip_3_11150 | v2HS_238776 | TTCAGGATGAGCACTTTGAGCT  | NM_032539    | SLITRK2  | SLIT and NTRK-like family, member 2 (SLITRK2), mRNA                                                 | -1.58         | 0.39        | 0.16         | 0.78       | -1.74           | 0.04    |
| Hs_12plexchip_4_9947  | v2HS_16985  | TAAATGATAAAGAAGAACAGCA  | NM_130798    | SNAP23   | synaptosomal-associated protein, 23kDa (SNAP23), transcript variant 2, mRNA                         | -1.12         | 0.08        | 0.24         | 0.43       | -1.36           | 0.03    |
| Hs_12plexchip_6_1666  | v2HS_228001 | TAGAAACAATGCAAGCTGGGCA  | NM_022808    | SNRPN    | small nuclear ribonucleoprotein polypeptide N (SNRPN), transcript variant 5, mRNA                   | -1.79         | 0.89        | 0.25         | 0.45       | -2.05           | 0.04    |
| Hs_12plexchip_4_9555  | v2HS_19895  | TTTACTGGGCTATAAATACTC   | NM_012245    | SNW1     | SNW domain containing 1 (SNW1), mRNA                                                                | -1.38         | 0.33        | 0.46         | 0.22       | -1.84           | 0.00    |
| Hs_12plexchip_4_12266 | v2HS_153307 | TTTCTTCAAACCATGCATCCGA  | NM_003100    | SNX2     | sorting nexin 2 (SNX2), mRNA                                                                        | -1.22         | 0.18        | -0.02        | 0.52       | -1.20           | 0.05    |
| Hs_12plexchip_4_157   | v2HS_96222  | TTTAGTCTCGGATAGGACCCA   | NM_199436    | SPAST    | spastin (SPAST), transcript variant 2, mRNA                                                         | -1.87         | 0.20        | 0.32         | 1.06       | -2.20           | 0.07    |
| Hs_12plexchip_5_3220  | v2HS_210161 | TAAATGCCTGATATATGCCCGA  | NM_138796    | SPATA17  | spermatogenesis associated 17 (SPATA17), mRNA                                                       | -1.82         | 0.50        | -0.23        | 0.67       | -1.59           | 0.03    |
| Hs_12plexchip_3_10829 | v2HS_234466 | TAAGGAAACTCTCCCGAGGGC   | NM_016642    | SPTBN5   | spectrin, beta, non-erythrocytic 5 (SPTBN5), mRNA                                                   | -1.04         | 0.42        | 0.14         | 0.37       | -1.17           | 0.02    |
| Hs_12plexchip_5_1865  | v2HS_213472 | TTTGCTTCAACTTTGGGAGGT   | NM_194285    | SPTY2D1  | SPT2, Suppressor of Ty, domain containing 1 (S. cerevisiae) (SPTY2D1), mRNA                         | -1.05         | 0.46        | 0.03         | 0.31       | -1.08           | 0.03    |
| Hs_12plexchip_5_11897 | v2HS_133518 | TTAGCATAAGAGGGGATCCAGCA | NM_152713    | STT3A    | STT3, subunit of the oligosaccharyltransferase complex, homolog A (S. cerevisiae) (STT3A), mRNA     | -1.10         | 0.11        | 0.00         | 0.17       | -1.10           | 0.00    |
| Hs_12plexchip_5_7120  | v2HS_262274 | TTAAGTACACATATACTAAGCT  | NM_024670    | SUV39H2  | suppressor of variegation 3-9 homolog 2 (Drosophila) (SUV39H2), mRNA                                | -1.95         | 0.14        | 0.14         | 0.36       | -2.08           | 0.00    |
| Hs_12plexchip_2_4682  | v2HS_183183 | ATGGGACAGCAAGGGAAGAGGG  | NM_001040709 | SYPL2    | synaptophysin-like 2 (SYPL2), mRNA                                                                  | -1.00         | 0.21        | 0.05         | 0.23       | -1.05           | 0.00    |
| Hs_12plexchip_6_6223  | v2HS_274283 | ATGTATCCCGATGCCAATGGA   | NM_206930    | SYTL2    | synaptotagmin-like 2 (SYTL2), transcript variant f, mRNA                                            | -1.04         | 0.18        | 0.16         | 0.73       | -1.20           | 0.10    |
| Hs_12plexchip_5_1955  | v2HS_206836 | ATAGATTAGCACTTACCAGGCC  | AY114096     | TAS2R62P | TASTE RECEPTOR, TYPE 2, MEMBER 62 PSEUDOGENE                                                        | -1.57         | 0.19        | -0.52        | 0.16       | -1.04           | 0.00    |
| Hs_12plexchip_6_9376  | v2HS_211591 | TAAACCTGTGAGAACCCTGCTGG | NM_005993    | TBCD     | tubulin folding cofactor D (TBCD), mRNA                                                             | -2.24         | 0.50        | 0.50         | 0.60       | -2.74           | 0.00    |
| Hs_12plexchip_2_9032  | v2HS_32310  | TTCAACTTGGACTGGATTCC    | NM_003598    | TEAD2    | TEA domain family member 2 (TEAD2), mRNA                                                            | -1.01         | 0.14        | 0.09         | 0.46       | -1.09           | 0.05    |
| Hs_12plexchip_5_4816  | v2HS_256721 | TAAACTGATTAGGGTCTTTGCC  | NM_021809    | TGIF2    | TGFB-induced factor homeobox 2 (TGIF2), mRNA                                                        | -1.85         | 1.01        | 0.39         | 0.68       | -2.24           | 0.04    |
| Hs_12plexchip_4_160   | v2HS_49799  | ATAGCAAGAGAAATAATAGCTA  | NM_005131    | THOC1    | THO complex 1 (THOC1), mRNA                                                                         | -1.35         | 0.54        | -0.11        | 0.45       | -1.24           | 0.04    |

| Probe ID              | v2HS        | Sequence                | Accession    | Symbol  | Gene Name                                                                                       | Mut log2 mean | Mut log2 SD | WT log2 Mean | WT log2 SD | log2 difference | P-value |
|-----------------------|-------------|-------------------------|--------------|---------|-------------------------------------------------------------------------------------------------|---------------|-------------|--------------|------------|-----------------|---------|
| Hs_12plexchip_5_945   | v2HS_248909 | TTGAAGTCTAAGGTGTGTGGCG  | NM_013337    | TIMM22  | translocase of inner mitochondrial membrane 22 homolog (yeast) (TIMM22), mRNA                   | -1.33         | 0.17        | 0.04         | 0.75       | -1.37           | 0.08    |
| Hs_12plexchip_6_9575  | v2HS_243560 | AACAAGTCTCAGGATTGGTCCG  | NM_004614    | TK2     | thymidine kinase 2, mitochondrial (TK2), mRNA                                                   | -1.33         | 0.54        | -0.22        | 0.28       | -1.11           | 0.05    |
| Hs_12plexchip_5_4550  | v2HS_261717 | ATAGACTTTCTCAACATTGCT   | NM_006827    | TMED10  | transmembrane emp24-like trafficking protein 10 (yeast) (TMED10), mRNA                          | -1.32         | 0.51        | 0.74         | 0.61       | -2.06           | 0.01    |
| Hs_12plexchip_5_9298  | v2HS_99077  | TAGGGTAAATGTTTGATTGCGGA | NM_001105199 | TMEM177 | transmembrane protein 177 (TMEM177), transcript variant 3, mRNA                                 | -1.43         | 0.61        | 0.21         | 0.62       | -1.64           | 0.03    |
| Hs_12plexchip_6_9408  | v2HS_155633 | ATAAATGAGTGCATGAGTTGCT  | NM_018087    | TMEM48  | transmembrane protein 48 (TMEM48), mRNA                                                         | -2.78         | 0.17        | -0.48        | 0.57       | -2.30           | 0.01    |
| Hs_12plexchip_6_6716  | v2HS_137756 | TTAGGGTTGCACCAAGAAAGGT  | NM_030938    | TMEM49  | transmembrane protein 49 (TMEM49), mRNA                                                         | -1.32         | 0.18        | -0.30        | 0.27       | -1.02           | 0.01    |
| Hs_12plexchip_5_9109  | v2HS_270206 | ATACCCAGAACACATTAAGCCT  | NM_014765    | TOMM20  | translocase of outer mitochondrial membrane 20 homolog (yeast) (TOMM20), mRNA                   | -1.21         | 0.35        | 0.13         | 0.30       | -1.35           | 0.01    |
| Hs_12plexchip_4_7624  | v2HS_171497 | ATAGTTCACAAAGTAGTGGGCA  | NM_003291    | TPP2    | tripeptidyl peptidase II (TPP2), mRNA                                                           | -1.78         | 0.67        | -0.10        | 0.84       | -1.68           | 0.06    |
| Hs0P00004139          | v2HS_250531 | TTGGGTTGTCCTTCGTTGCC    | NM_033278    | TRIM3   | TRIPARTITE MOTIF-CONTAINING 3                                                                   | -2.28         | 0.46        | 0.43         | 0.11       | -2.72           | 0.01    |
| Hs_12plexchip_5_3544  | v2HS_26742  | ATTAGTACGAAGGTTAACGCT   | NM_018700    | TRIM36  | tripartite motif-containing 36 (TRIM36), transcript variant 1, mRNA                             | -1.80         | 0.16        | -0.23        | 0.69       | -1.57           | 0.05    |
| Hs0P00003959          | v2HS_195606 | TTCTTCAACTCTAGCTCAGCA   | NM_021253    | TRIM39  | TRIPARTITE MOTIF-CONTAINING 39                                                                  | -1.42         | 0.38        | -0.21        | 0.41       | -1.21           | 0.02    |
| Hs_12plexchip_6_2045  | v2HS_154686 | AATTCAGAACACATGGAATGGG  | NM_017583    | TRIM44  | tripartite motif-containing 44 (TRIM44), mRNA                                                   | -3.92         | 0.38        | -1.00        | 1.42       | -2.92           | 0.06    |
| Hs0P00003738          | v2HS_50110  | TTGGTCACTACTGAGTGTGGG   | NM_012339    | TSPAN15 | tetraspanin 15 (TSPAN15), mRNA                                                                  | -2.49         | 0.52        | -0.32        | 0.47       | -2.18           | 0.01    |
| Hs_12plexchip_4_900   | v2HS_117659 | TTTATGGACTTGCCAGAGCT    | NM_032028    | TSSK1B  | testis-specific serine kinase 1B (TSSK1B), mRNA                                                 | -1.51         | 0.43        | -0.48        | 0.13       | -1.03           | 0.04    |
| Hs_12plexchip_6_5974  | v2HS_157607 | TTAATAAGAGCTCAGCCAGGT   | NM_024753    | TTC21B  | tetratricopeptide repeat domain 21B (TTC21B), mRNA                                              | -1.58         | 0.90        | 0.06         | 0.81       | -1.64           | 0.08    |
| Hs_12plexchip_5_12240 | v2HS_200049 | ATAGGATAAAGGATTGAGCCAG  | NM_014444    | TUBGCP4 | tubulin, gamma complex associated protein 4 (TUBGCP4), mRNA                                     | -1.22         | 0.13        | 0.04         | 0.09       | -1.26           | 0.00    |
| Hs_12plexchip_5_9682  | v2HS_231097 | ATGAATGCATTTAGACACCGGA  | NM_000474    | TWIST1  | twist homolog 1 (acrocephalosyndactyly 3; Saethre-Chotzen syndrome) (Drosophila) (TWIST1), mRNA | -1.25         | 0.21        | 0.08         | 0.21       | -1.33           | 0.00    |
| Hs_12plexchip_5_8132  | v2HS_111298 | AACTGAGAGAACATCAGCTGCC  | NM_177967    | UBAC2   | UBA domain containing 2 (UBAC2), mRNA                                                           | -1.07         | 0.61        | -0.08        | 0.32       | -1.00           | 0.09    |
| Hs_12plexchip_6_773   | v2HS_171717 | TTTAAAGCTAATCTCTTAGGT   | NM_153280    | UBE1    | ubiquitin-activating enzyme E1 (UBE1), transcript variant 2, mRNA                               | -1.04         | 0.36        | 0.37         | 0.65       | -1.42           | 0.04    |
| Hs_12plexchip_5_3620  | v2HS_255135 | TACTGCAATAATCAGAAGGGCT  | NM_003338    | UBE2D1  | ubiquitin-conjugating enzyme E2D 1 (UBC4/5 homolog, yeast) (UBE2D1), mRNA                       | -1.16         | 0.85        | 0.64         | 0.36       | -1.79           | 0.05    |
| Hs0P00006197          | v2HS_171781 | TATAAACACAAAGGAAGTGCGC  | NM_194261    | UBE2I   | UBIQUITIN-CONJUGATING ENZYME E2I (UBC9 HOMOLOG, YEAST)                                          | -1.85         | 0.11        | -0.67        | 0.08       | -1.18           | 0.00    |
| Hs_12plexchip_5_3549  | v2HS_46734  | ATTCATTTCCCATCGCTGAGTG  | NM_003969    | UBE2M   | ubiquitin-conjugating enzyme E2M (UBC12 homolog, yeast) (UBE2M), mRNA                           | -1.45         | 0.65        | -0.06        | 0.65       | -1.38           | 0.06    |
| Hs_12plexchip_5_3354  | v2HS_254989 | ATATGCGCCTTGAAGTAGCCGC  | NM_017811    | UBE2R2  | ubiquitin-conjugating enzyme E2R 2 (UBE2R2), mRNA                                               | -1.76         | 0.51        | -0.33        | 0.36       | -1.43           | 0.02    |
| Hs_12plexchip_5_6199  | v2HS_262978 | TTAGGATGGGATCCATCTTCCC  | NM_130466    | UBE3B   | ubiquitin protein ligase E3B (UBE3B), transcript variant 1, mRNA                                | -1.05         | 0.30        | 0.38         | 0.28       | -1.44           | 0.00    |
| Hs_12plexchip_5_12253 | v2HS_199008 | ATATAGTCTCTCATGATCTCT   | NM_014233    | UBTF    | upstream binding transcription factor, RNA polymerase I (UBTF), transcript variant 1, mRNA      | -2.02         | 0.08        | -0.80        | 0.70       | -1.22           | 0.09    |
| Hs_12plexchip_5_1406  | v2HS_64096  | TAAACATACTCAAACACAGCA   | NM_001003684 | UCRC    | ubiquinol-cytochrome c reductase complex (7.2 kD) (UCRC), transcript variant 2, mRNA            | -1.67         | 0.20        | -0.56        | 0.46       | -1.11           | 0.04    |
| Hs0P00005210          | v2HS_149461 | TTTACCACCCTTATAAATGCCA  | AB071698     | UHRF2   | UBIQUITIN-LIKE, CONTAINING PHD AND RING FINGER DOMAINS, 2                                       | -1.95         | 0.16        | -0.20        | 0.38       | -1.75           | 0.01    |
| Hs_12plexchip_5_3292  | v2HS_159709 | TTTAGGGTTGTGTTGACTAGGT  | NM_032663    | USP30   | ubiquitin specific peptidase 30 (USP30), mRNA                                                   | -1.24         | 0.79        | 0.18         | 0.55       | -1.42           | 0.07    |
| Hs_12plexchip_5_281   | v2HS_243816 | AATATTGGTTTGGGTAGTCCC   | NM_004505    | USP6    | ubiquitin specific peptidase 6 (Tre-2 oncogene) (USP6), mRNA                                    | -1.54         | 0.83        | 0.02         | 0.40       | -1.56           | 0.06    |
| Hs_12plexchip_5_12261 | v2HS_245827 | TTAAGAGGTGGCATATTCAGGT  | NM_004654    | USP9Y   | UBIQUITIN SPECIFIC PEPTIDASE 9, Y-LINKED (FAT FACETS-LIKE, DROSOPHILA)                          | -1.03         | 0.62        | 0.09         | 0.36       | -1.12           | 0.07    |
| Hs_12plexchip_2_11994 | v2HS_41380  | CTAGAGGATAATTAACCCGG    | NM_004666    | VNN1    | vanin 1 (VNN1), mRNA                                                                            | -1.28         | 0.08        | -0.24        | 0.32       | -1.03           | 0.03    |
| Hs_12plexchip_5_5571  | v2HS_255610 | TTTACCAATACTGGATATTCGG  | NM_014703    | VPRBP   | Vpr (HIV-1) binding protein (VPRBP), mRNA                                                       | -2.99         | 0.73        | -0.58        | 0.32       | -2.41           | 0.02    |
| Hs_12plexchip_4_6384  | v2HS_56762  | TTTACATTCCACAAGTCCAGGC  | NM_139281    | WDR36   | WD repeat domain 36 (WDR36), mRNA                                                               | -2.84         | 1.42        | 0.21         | 0.95       | -3.04           | 0.04    |
| Hs_12plexchip_4_9846  | v2HS_60148  | ATTCACACAAATGTAATGCCCT  | NM_014023    | WDR37   | WD repeat domain 37 (WDR37), mRNA                                                               | -1.94         | 0.57        | -0.80        | 0.66       | -1.14           | 0.09    |

| Probe ID              | v2HS        | Sequence                   | Accession    | Symbol   | Gene Name                                                                                                | Mut log2 mean | Mut log2 SD | WT log2 Mean | WT log2 SD | log2 difference | P-value |
|-----------------------|-------------|----------------------------|--------------|----------|----------------------------------------------------------------------------------------------------------|---------------|-------------|--------------|------------|-----------------|---------|
| Hs_12plexchip_3_7805  | v2HS_229697 | TTATACATCAGGATTGTTAGGA     | NM_015420    | WDSOF1   | WD repeats and SOF1 domain containing (WDSOF1), mRNA                                                     | -1.46         | 0.65        | -0.15        | 0.57       | -1.32           | 0.06    |
| Hs_12plexchip_5_1388  | v2HS_57489  | ATATCCAAGTCTCAGGACCCT      | NM_080869    | WFDC12   | WAP four-disulfide core domain 12 (WFDC12), mRNA                                                         | -1.04         | 0.78        | 0.31         | 0.72       | -1.36           | 0.09    |
| Hs_12plexchip_2_4319  | v2HS_81482  | TTTTCAGCTTTTTCAGGATCTCAGGG | NM_015238    | WWC1     | WW and C2 domain containing 1 (WWC1), mRNA                                                               | -1.07         | 0.59        | 0.09         | 0.59       | -1.16           | 0.07    |
| Hs0P00010609          | v2HS_172053 | TTTGACAGAGACTTTCGCTGGT     | NM_003400    | XPO1     | EXPORTIN 1 (CRM1 HOMOLOG, YEAST)                                                                         | -1.62         | 0.69        | -0.34        | 0.29       | -1.28           | 0.07    |
| Hs_12plexchip_5_3512  | v2HS_95794  | TACTTCTATGCTATGGGCTGCT     | NM_014872    | ZBTB5    | zinc finger and BTB domain containing 5 (ZBTB5), mRNA                                                    | -1.82         | 0.67        | -0.26        | 0.14       | -1.56           | 0.05    |
| Hs_12plexchip_2_6697  | v2HS_177528 | TATGACCTTGGCCTGATTGCGG     | NM_032786    | ZC3H10   | zinc finger CCCH-type containing 10 (ZC3H10), mRNA                                                       | -1.55         | 0.22        | 0.06         | 0.59       | -1.61           | 0.03    |
| Hs_12plexchip_4_1308  | v2HS_205155 | TTTCTTCTACTTTGCTGGGCT      | NM_015070    | ZC3H13   | zinc finger CCCH-type containing 13 (ZC3H13), mRNA                                                       | -1.90         | 0.51        | -0.81        | 0.58       | -1.09           | 0.07    |
| Hs_12plexchip_6_6092  | v2HS_175791 | AACAGGAACAGCATCAATGGCT     | NM_018471    | ZC3H15   | zinc finger CCCH-type containing 15 (ZC3H15), mRNA                                                       | -1.04         | 0.90        | 0.99         | 0.22       | -2.03           | 0.05    |
| Hs0P00011471          | v2HS_19371  | TATAGATATATTTCTGATCCGG     | NM_144604    | ZC3H18   | zinc finger CCCH-type containing 18 (ZC3H18), mRNA                                                       | -2.59         | 0.79        | -0.46        | 0.09       | -2.14           | 0.04    |
| Hs_12plexchip_4_10479 | v2HS_70944  | TGACAGTATCCTTTAGCATCTA     | NM_080660    | ZC3HAV1L | zinc finger CCCH-type, antiviral 1-like (ZC3HAV1L), mRNA                                                 | -1.84         | 0.72        | -0.34        | 0.69       | -1.50           | 0.06    |
| Hs_12plexchip_6_5942  | v2HS_203541 | TTTCCCTCCAGGAAGAACGGGC     | NM_181485    | ZGPAT    | zinc finger, CCCH-type with G patch domain (ZGPAT), transcript variant 3, mRNA                           | -1.09         | 0.41        | 0.07         | 0.77       | -1.16           | 0.10    |
| Hs_12plexchip_5_4248  | v2HS_260005 | TATGGTCTGAATAGGCTGGA       | NM_001011657 | ZMAT1    | zinc finger, matrin type 1 (ZMAT1), transcript variant 1, mRNA                                           | -1.16         | 0.16        | 0.27         | 0.21       | -1.43           | 0.00    |
| Hs_12plexchip_2_1211  | v2HS_78271  | ATATTGTGATGTTTAATGAGGT     | NM_001012756 | ZNF260   | zinc finger protein 260 (ZNF260), mRNA                                                                   | -1.22         | 0.22        | -0.14        | 0.52       | -1.08           | 0.05    |
| Hs_12plexchip_6_6835  | v2HS_160859 | TTTCCAGTCTGATAGAGGCT       | NM_173548    | ZNF584   | zinc finger protein 584 (ZNF584), mRNA                                                                   | -1.16         | 0.54        | 0.42         | 0.55       | -1.58           | 0.02    |
| Hs0P00010224          | v2HS_112771 | TTTGCTTCCCAAGGAGGAACGG     | NM_001237    | CCNA2    | CYCLIN A2                                                                                                | -1.53         | 0.28        | 0.21         | 0.15       | -1.73           | 0.00    |
| Hs0P00005647          | v2HS_254661 | TATTCTAATCCAATATACAGCA     | NM_003903    | CDC16    | CDC16 CELL DIVISION CYCLE 16 HOMOLOG (S. CEREVISIAE)                                                     | -1.17         | 0.17        | 0.24         | 0.14       | -1.41           | 0.00    |
| Hs_12plexchip_5_10993 | v2HS_235686 | TTTCCATTACAGACTAGAAGGC     | NM_024529    | CDC73    | cell division cycle 73, Paf1/RNA polymerase II complex component, homolog (S. cerevisiae) (CDC73), mRNA  | -2.51         | 0.80        | -0.39        | 0.75       | -2.12           | 0.03    |
| Hs_12plexchip_3_9508  | v2HS_136197 | ATAATTCAGAATCTCAAGTGCG     | NM_024529    | CDC73    | cell division cycle 73, Paf1/RNA polymerase II complex component, homolog (S. cerevisiae) (CDC73), mRNA  | -2.05         | 0.45        | -0.14        | 0.71       | -1.91           | 0.02    |
| Hs_12plexchip_5_6926  | v2HS_262071 | ATAACAAATACCACAGAGAGCC     | NM_018101    | CDCA8    | cell division cycle associated 8 (CDCA8), mRNA                                                           | -1.20         | 0.38        | 0.13         | 0.78       | -1.33           | 0.08    |
| Hs0P00004945          | v2HS_201808 | TTAATACCTGCCTGAGCACCG      | NM_022105    | DIDO1    | DEATH INDUCER-OBLITERATOR 1                                                                              | -1.43         | 0.50        | -0.37        | 0.54       | -1.06           | 0.07    |
| Hs_12plexchip_5_6759  | v2HS_255163 | TTCTTACAAGTTAATGGCCA       | NM_014740    | EIF4A3   | eukaryotic translation initiation factor 4A, isoform 3 (EIF4A3), mRNA                                    | -2.25         | 0.73        | -0.88        | 0.75       | -1.37           | 0.09    |
| Hs_12plexchip_3_5015  | v2HS_110972 | ATAGCCAACAGTAGCATGTGGC     | NM_031407    | HUWE1    | HECT, UBA and WWE domain containing 1 (HUWE1), mRNA                                                      | -1.48         | 0.39        | -0.37        | 0.31       | -1.11           | 0.02    |
| Hs0P00000186          | v2HS_133559 | TTTCCACAAATCATACTGTCCC     | NM_002227    | JAK1     | JANUS KINASE 1 (A PROTEIN TYROSINE KINASE)                                                               | -1.42         | 0.68        | 0.02         | 0.64       | -1.44           | 0.06    |
| Hs_12plexchip_4_207   | v2HS_160244 | AATATTCTCAAGACGTTGCCT      | NM_173162    | KCNH7    | potassium voltage-gated channel, subfamily H (eag-related), member 7 (KCNH7), transcript variant 2, mRNA | -1.00         | 0.39        | 0.40         | 0.55       | -1.40           | 0.03    |
| Hs_12plexchip_4_10174 | v2HS_95371  | TATTGTATAGATGGAGGCTGCG     | XM_941746    | KIAA0258 | PREDICTED:KIAA0258, transcript variant 3 (KIAA0258), mRNA                                                | -2.37         | 0.85        | 0.07         | 0.15       | -2.45           | 0.03    |
| Hs_12plexchip_4_7706  | v2HS_170690 | ATTCTCTTCCACAGCTAGGC       | NM_002790    | PSMA5    | proteasome (prosome, macropain) subunit, alpha type, 5 (PSMA5), mRNA                                     | -1.92         | 0.21        | -0.74        | 0.61       | -1.17           | 0.07    |
| Hs0P00010747          | v2HS_19370  | TTTCATAGTCATAATAAGGGTC     | NM_144604    | ZC3H18   | zinc finger CCCH-type containing 18 (ZC3H18), mRNA                                                       | -2.32         | 0.58        | -0.62        | 0.23       | -1.71           | 0.02    |

**Supplemental Table 3. Validated shRNAs**

Qualifying shRNAs are those that reduce the normalized fitness of DLD-1 Ras Mut cells to below 90% of control FF shRNA in the competition assay. N/A, not analyzed.

| Symbol    | Accession    | v2SH        | Sequence                 | DLD-1 Mut cells fitness (% FF) |      | HCT116 Mut cells fitness (% FF) |      |
|-----------|--------------|-------------|--------------------------|--------------------------------|------|---------------------------------|------|
|           |              |             |                          | Mean                           | SD   | Mean                            | SD   |
| ANAPC1    | NM_022662    | v2HS_98169  | AATAGACATATCCATGGTGCCT   | 82.2                           | 3.2  | 48.3                            | 3.7  |
| ANAPC1    | NM_022662    | v2HS_98171  | TTTATGCAAACAGTTAAATGCT   | 55.1                           | 1.9  | 81.0                            | 6.9  |
| ANAPC1    | NM_022662    | v2HS_98167  | TATTAGTAATCGTTTCTGTCCA   | 75.5                           | 1.7  | 104.9                           | 10.7 |
| ANAPC4    | NM_013367    | v2HS_254660 | ATACAATGGAATACAGATTGCT   | 92.1                           | 5.8  | 51.4                            | 1.7  |
| ANAPC4    | NM_013367    | v2HS_64633  | TATACTAAAGACAAGGCGAGCT   | 84.8                           | 4.4  | 59.2                            | 4.8  |
| BXDC1     | NM_032194    | v2HS_257526 | ATTACTAGATTATTTGGCCGCT   | 84.6                           | 4.6  | 89.3                            | 3.0  |
| BXDC2     | NM_018321    | v2HS_275380 | TTGAACAAGGAATTAGCAGAT    | 79.4                           | 7.9  | 64.7                            | 2.7  |
| BXDC5     | NM_025065    | v2HS_235217 | TTTACCAAAGTTCAGATAGGC    | 71.4                           | 3.9  | 67.1                            | 3.2  |
| C19orf2   | NM_134447    | v2HS_23231  | TTATAAGACAATTTATCAGGCA   | 78.2                           | 2.9  | 67.1                            | 4.5  |
| C20orf121 | NM_024331    | v2HS_17999  | TGTAGATTTATCCAGTCTCTC    | 85.2                           | 2.9  | 83.1                            | 2.0  |
| C21orf45  | NM_018944    | v2HS_244109 | TTGTAATCAAGATTTCTGGGCG   | 80.9                           | 1.3  | 68.5                            | 4.8  |
| CASC5     | NM_144508    | v2HS_38737  | ATAGACAAGGATTTGACAGGC    | 68.2                           | 2.6  | 62.7                            | 6.4  |
| CCNA2     | NM_001237    | v2HS_112771 | TTTGCTTTCCAAGGAGGAACGG   | 61.1                           | 1.3  | N/A                             | N/A  |
| CCT2      | NM_006431    | v2HS_198914 | TATCCATGCTTAAAGAAATCGT   | 82.1                           | 5.8  | 90.7                            | 2.2  |
| CDC16     | NM_003903    | v2HS_254661 | TATTTCTAATCCAATACACAGA   | 51.9                           | 6.8  | N/A                             | N/A  |
| CDC27     | NM_001256    | v2HS_112887 | ATTTGGATCAACTTGATAGCT    | 89.8                           | 18.3 | N/A                             | N/A  |
| CDCA8     | NM_018101    | v2HS_262071 | ATAACAATACCACAGAGAGCC    | 83.3                           | 2.8  | 56.8                            | 1.7  |
| COPS3     | NM_011991    | v2MM_21587  | TATGATTTCAACATGATATGGC   | 81.5                           | 1.4  | N/A                             | N/A  |
| COPS4     | NM_016129    | v2HS_229617 | TTAGCTTAATACACAGAGACCC   | 83.0                           | 2.6  | N/A                             | N/A  |
| COPS8     | NM_198189    | v2HS_118859 | ATATAAGCTAGAAAGCTGACCA   | 86.7                           | 5.0  | N/A                             | N/A  |
| CSE1L     | NM_001316    | v2HS_113224 | AATGAATGTGCTGTACGGAGGA   | 66.2                           | 3.0  | 46.2                            | 3.7  |
| CXORF40A  | CR605567     | v2HS_144182 | TTTCTGGAGAGTGTCTGGGC     | 76.1                           | 6.0  | 95.4                            | 4.1  |
| DATF1     | NM_022105    | v2HS_202805 | TTTAGCTTCTGTGATCTGGCC    | 72.7                           | 10.9 | N/A                             | N/A  |
| DCTN4     | NM_016221    | v2HS_114977 | TTTGTAAAGATCAGGAGGACCT   | 81.5                           | 1.8  | 92.4                            | 1.6  |
| DHX8      | D50487       | v2HS_130548 | TATAAATGTCCACCAATGGTGGG  | 39.0                           | 6.4  | 22.0                            | 1.4  |
| EIF3S4    | NM_003755    | v2HS_23869  | TCTTGTACTGTCACTGTCTT     | 53.4                           | 9.6  | N/A                             | N/A  |
| EIF3S8    | NM_003752    | v2HS_242811 | TTAAGAAATCTTGAGGCGACGG   | 65.7                           | 4.8  | N/A                             | N/A  |
| ERH       | NM_004450    | v2HS_242534 | ATGTGATAGAGGGACTGTTGGG   | 61.0                           | 2.5  | 45.4                            | 1.8  |
| FBL       | NM_001436    | v2HS_113773 | TTCTCTCCATAAATGATTCCC    | 81.2                           | 4.6  | 35.7                            | 6.2  |
| FIP1L1    | NM_030917    | v2HS_137633 | TTTCACAGTAAGCTTTCCAGGT   | 86.7                           | 1.9  | 59.1                            | 1.1  |
| FLJ34747  | AK092066     | v2HS_103190 | TTATTGCCITTACTTCTGTGGG   | 53.2                           | 7.6  | 53.7                            | 4.9  |
| FREM1     | NM_144966    | v2HS_36153  | CTAATGATGGATACTTTGGCCT   | 83.8                           | 11.7 | 96.9                            | 2.1  |
| GDF10     | NM_004962    | v2HS_249954 | TTCTCATCCAGGAAGAGGACCC   | 87.9                           | 7.9  | 103.7                           | 1.8  |
| GSPT1     | NM_002094    | v2HS_265999 | TTATTAATAGCACAAATAGGT    | 85.5                           | 3.5  | 79.9                            | 3.0  |
| HNRNPC    | NM_004500    | v2HS_117147 | ATGGGATAAGATTTTCAAACCC   | 42.1                           | 6.8  | 66.0                            | 6.1  |
| IL10RA    | NM_001558    | v2HS_132313 | TTTGCAGATGGGTGCCAGAGGT   | 49.6                           | 4.3  | 91.8                            | 22.0 |
| IL1RAP    | AK095107     | v2HS_266151 | TTCTTCAGTTGCTTAGAGGGCC   | 54.6                           | 12.7 | 94.3                            | 5.0  |
| IREB2     | NM_004136    | v2HS_72166  | TTGAAGAAGAACAAGGGGAGGG   | 78.7                           | 4.7  | 93.2                            | 2.3  |
| JAK1      | NM_002227    | v2HS_133559 | TTTACCAAATCATACTGTCCC    | 79.8                           | 20.1 | 57.0                            | 24.8 |
| KCNH7     | NM_173162    | v2HS_160241 | ATATCGATCCAGTTTCTGGCC    | 70.3                           | 6.2  | 96.6                            | 2.4  |
| KIAA0258  | XM_941746    | v2HS_95371  | TATTGTATAGATGGAGGCTGCG   | 24.6                           | 5.9  | 49.5                            | 1.9  |
| KIF2C     | NM_006845    | v2HS_78033  | ATTTCTGCTTATTCAGTGGCGG   | 89.0                           | 6.4  | 99.3                            | 1.9  |
| LOC149654 | XM_086625    | v2HS_101621 | TAACCAAGAATATATATCCGA    | 74.0                           | 4.4  | N/A                             | N/A  |
| LOC283194 | AK091446     | v2HS_182508 | TTTCTTTTCTCTTCCATCCA     | 74.1                           | 9.0  | 56.3                            | 2.6  |
| LOC285556 | XM_373030    | v2HS_21776  | TTAAGGCAACAATAGTGTCTGT   | 84.6                           | 4.9  | 87.5                            | 3.1  |
| LOC730000 | XM_001132025 | v2HS_117690 | TTATTGCAGGTTCCAACCGGG    | 89.0                           | 4.5  | 91.2                            | 2.3  |
| MAPK7     | NM_139033    | v2HS_71361  | TGAAGTACTGATGTTCAAGCGGG  | 71.6                           | 5.9  | N/A                             | N/A  |
| METAP2    | NM_006838    | v2HS_197525 | ATTCCAAATCTTCTCACTGGCC   | 83.0                           | 12.7 | 94.2                            | 6.9  |
| MTX2      | NM_001006635 | v2HS_196467 | TTAACAATGGACTATTGGAC     | 74.4                           | 1.4  | 78.6                            | 5.5  |
| NEDD8     | NM_006156    | v2HS_64585  | ATATGATGCCTCATTATGAGCG   | 62.7                           | 4.1  | 60.9                            | 5.8  |
| NF1       | NM_000267    | v2HS_260806 | TTAAGTAATGCGATATTGAGCA   | 83.4                           | 2.0  | 92.5                            | 6.7  |
| NOL5A     | NM_006392    | v2HS_253869 | ATTAACAATTAACATTTGGCACGG | 76.2                           | 4.6  | 89.7                            | 3.7  |
| NUP93     | NM_014669    | v2HS_79283  | TTCTTGAGTAAAGTCAAGGGCG   | 57.6                           | 7.6  | 66.5                            | 7.8  |
| NUP93     | NM_014669    | v2HS_259822 | TATAGATATAAATTTGCCGCG    | 28.3                           | 29.2 | 72.2                            | 15.5 |
| NXF1      | NM_006362    | v2HS_197810 | TTTCTTTGAGGGAATTAACGC    | 74.4                           | 0.4  | 33.1                            | 4.1  |
| PLK1      | NM_005030    | v2HS_19708  | TGTAATTAGGAGTCCACACAG    | 7.5                            | 3.4  | N/A                             | N/A  |
| PPP1R8    | NM_002713    | v2HS_170331 | ATGTTTCTCAACTTGTCTCT     | 86.8                           | 1.2  | N/A                             | N/A  |
| PSEN1     | NM_000021    | v2HS_89936  | TAATAATGTAAGGCACAACCA    | 19.9                           | 8.3  | 39.1                            | 3.4  |
| PSMA5     | NM_002790    | v2HS_221829 | TTCTCTTCCACAGCTAGGCA     | 69.5                           | 7.9  | 80.6                            | 4.5  |
| PSMB5     | NM_002797    | v2HS_170736 | TATAAATAGGATGGAGGATGGG   | 46.3                           | 2.5  | 57.9                            | 8.4  |
| PSMB6     | NM_002798    | v2HS_277575 | AACACATCTCTTAAAGAGGCT    | 62.6                           | 2.8  | 84.7                            | 14.9 |
| QARS      | NM_005051    | v2HS_19130  | AATAGTCAGACGCATATGTGAC   | 78.2                           | 1.8  | 85.9                            | 2.3  |
| RIMS1     | NM_014989    | v2HS_96371  | TTTCTCCATGAATATGTCGCT    | 81.9                           | 2.5  | 88.5                            | 4.7  |
| RIOK1     | NM_031480    | v2HS_117526 | TATGGTTCCTATTTATTTGCC    | 39.5                           | 18.6 | 71.6                            | 12.6 |
| SAE1      | NM_005500    | v2HS_64402  | TTTAACTATGACATCCCTGGAG   | 58.6                           | 3.8  | 84.6                            | 14.4 |
| SFHM1     | NM_006304    | v2HS_33286  | ATTATCTCCACAGCATGTGCA    | 64.9                           | 1.8  | 64.3                            | 4.1  |
| SMC4      | NM_001002800 | v2HS_68088  | TTTCAACTTAATCTAAGTGA     | 81.7                           | 2.1  | 59.8                            | 8.1  |
| SUV39H2   | NM_024670    | v2HS_262274 | TTAAGTACACATATACTAAGCT   | 52.7                           | 5.0  | 54.8                            | 6.8  |
| THOC1     | NM_005131    | v2HS_49799  | ATAGCAAGAGAAATATAGCTA    | 66.1                           | 4.1  | 33.8                            | 5.5  |
| TMED10    | NM_006827    | v2HS_261717 | ATAGACTTTTCTCAACAATTTGCT | 70.7                           | 12.1 | 89.9                            | 3.5  |
| TRIM44    | NM_017583    | v2HS_154686 | AATTGAGAACACATGGAATGGG   | 83.4                           | 4.1  | 107.3                           | 0.7  |
| UBA2      | NM_005499    | v2HS_255026 | TTATCTAAAGCATTCATAACCA   | 43.4                           | 1.1  | 45.0                            | 5.1  |
| UBE1      | NM_153280    | v2HS_171717 | TTTAAAGCTAATCTTCTTAGGT   | 84.7                           | 5.3  | 45.1                            | 13.4 |
| UBE2I     | NM_194261    | v2HS_171776 | TTGGCAGTAAATCGTGTAGGCC   | 25.3                           | 7.6  | 64.2                            | 1.0  |
| UBE2I     | NM_194261    | v2HS_171781 | TATAAACACAAAGAGTGGCG     | 50.9                           | 3.6  | 132.1                           | 21.0 |
| UCRF      | NM_001003684 | v2HS_64096  | TAAACATACITCAAACACAGCA   | 76.9                           | 2.8  | 92.2                            | 4.8  |
| UHRF2     | NM_152896    | v2HS_149461 | TTTCAACACCTTATAATGCCA    | 57.6                           | 12.1 | N/A                             | N/A  |
| USP39     | NM_006590    | v2HS_196240 | AATTCATACACTTTGCCTGTCC   | 58.4                           | 1.0  | 47.7                            | 8.2  |
| WDSOF1    | NM_015420    | v2HS_229697 | TTATACATCAGGATTTGTTAGGA  | 82.1                           | 6.3  | 96.4                            | 2.4  |
| XPO1      | NM_003400    | v2HS_172053 | TTTGACAGAGACTTTCGCTGGT   | 78.6                           | 11.8 | N/A                             | N/A  |
| ZC3H18    | NM_144604    | v2HS_19371  | TATAGATATTTCTGTATCCGG    | 80.7                           | 2.1  | 59.6                            | 9.4  |
| ZC3H18    | NM_144604    | v2HS_19370  | TTTCATAGTCATAATAAGGGTC   | 89.4                           | 0.5  | 64.0                            | 3.0  |
| ZC3HAV1L  | NM_080660    | v2HS_70944  | TGACAGTATCCTTTAGCATCTA   | 76.2                           | 4.6  | 84.8                            | 5.2  |

**Supplemental Table 4. Additional sequence information of shRNAs and siRNAs used in validation experiments**

| Gene symbol             | Accession    | shRNA/<br>siRNA | ID #     | Catalog #              | Sequence                 |
|-------------------------|--------------|-----------------|----------|------------------------|--------------------------|
| Firefly luciferase (FF) | N/A          | shRNA           | FF       | N/A                    | CCCGCTGAAGTCTCTGATTAA    |
| ANAPC1                  | NM_022662    | shRNA           | 1        | v2HS_237650            | ACGCTTAGCATGGACTAGAAAT   |
| ANAPC1                  | NM_022662    | shRNA           | 3        | v2HS_98171             | TTTATGCCAAACAGTTAAATGCT  |
| ANAPC1                  | NM_022662    | shRNA           | 2        | v2HS_98167             | TATTAGTAATCGTTTCTGTCCA   |
| ANAPC4                  | NM_013367    | shRNA           | 1        | v2HS_64632             | AACTCTCTTGATGAATCAGTTA   |
| ANAPC4                  | NM_013367    | shRNA           | 2        | v2HS_64629             | ACCGCTTTAGCTCCAGAGATAG   |
| THOC1                   | NM_005131    | shRNA           | 1        | v2HS_49801             | CTGACTCTGCAAGTTAAGACCT   |
| THOC1                   | NM_005131    | shRNA           | 2        | v2HS_243240            | TATTTCTTCAGAAAGGAGGCGGT  |
| THOC1                   | NM_005131    | shRNA           | 3        | v2HS_245224            | TATTATCAGGGCAAAGATTCCA   |
| THOC1                   | NM_005131    | shRNA           | 4        | v2HS_49802             | TTTGATTTCCAAGTAGCAACAT   |
| DHX8                    | D50487       | shRNA           | 1        | v2HS_130548            | TATAAATGTCAACCAATGGTGGG  |
| DHX8                    | D50487       | shRNA           | 2        | v2HS_203261            | TTTCTGTTTCACGAATCCTGGG   |
| DHX8                    | D50487       | shRNA           | 3        | v2HS_202419            | TTTGGAAAGGACATTGGCAGCA   |
| USP39                   | NM_006590    | shRNA           | 1        | v2HS_196240            | AATTCATACCATTGCGCTGTCC   |
| USP39                   | NM_006590    | shRNA           | 2        | v2HS_13479             | TTAGATATGGAGGCAACTTGGT   |
| USP39                   | NM_006590    | shRNA           | 3        | v2HS_197637            | TTTAGTGAAGATCCTCATGGAC   |
| UBE2I                   | NM_194261    | shRNA           | 1        | v2HS_171781            | TATAAACACAAGGAAGTGGCG    |
| UBE2I                   | NM_194261    | shRNA           | 2        | v2HS_171776            | TTGGCAGTAAATCGTGTAGGCC   |
| COPS3                   | NM_011991    | shRNA           | 1        | v2MM_38091             | TTACAGATATCCATCATATCCA   |
| COPS3                   | NM_011991    | shRNA           | 2        | v2MM_21587             | TATGATTCCAACATGATATGGC   |
| COPS4                   | NM_016129    | shRNA           | 1        | v2HS_229617            | TTAGCTTAATACACAGAGACCC   |
| COPS4                   | NM_016129    | shRNA           | 2        | v2HS_97713             | AATGAAATGACTCTAGGCTGGA   |
| COPS4                   | NM_016129    | shRNA           | 3        | v2HS_230530            | ATCCATTATACATCGTCTCGGT   |
| COPS4                   | NM_016129    | shRNA           | 4        | v2HS_233448            | TTTAGCCACAGATATTTACCT    |
| COPS4                   | NM_016129    | shRNA           | 5        | v2HS_97714             | TTTATGTAAGCCTCTGCCTGGA   |
| C21orf45                | NM_018944    | shRNA           | 1        | v2HS_244109            | TTGTAATCAAGATTCTTGGGCG   |
| C21orf45                | NM_018944    | shRNA           | 2        | v2HS_52005             | TAATGCTTTCAGACATCTTCC    |
| C21orf45                | NM_018944    | shRNA           | 3        | v2HS_52006             | ATTTGTAATGCTTCAAGACAT    |
| CASC5                   | NM_144508    | shRNA           | 1        | v2HS_38737             | ATAGACAAGGATTTGACAGGC    |
| CASC5                   | NM_144508    | shRNA           | 2        | v2HS_38738             | ATATATTGAGAAGGACTTAGGT   |
| CASC5                   | NM_144508    | shRNA           | 3        | v2HS_38668             | AATTAGCTAGAAATGATGTGGT   |
| CDCA8                   | NM_018101    | shRNA           | 1        | v2HS_262071            | ATAACAATACCACAGAGAGCC    |
| CDCA8                   | NM_018101    | shRNA           | 2        | v2HS_155714            | AATTTCCACTAAGTAGGGAGGT   |
| CDCA8                   | NM_018101    | shRNA           | 3        | v2HS_155711            | AITCCCTTAGAGGAACATGGCT   |
| SMC4                    | NM_001002800 | shRNA           | 1        | v2HS_68088             | TTTCAACTTAATACTAAGTGCA   |
| SMC4                    | NM_001002800 | shRNA           | 2        | v2HS_68092             | TTTACCATTGCTGAAACCCA     |
| PLK1                    | NM_005030    | shRNA           | 1        | v2HS_19708             | TGTAATTAGGAGTCCACACAG    |
| PLK1                    | NM_005030    | shRNA           | 2        | v2HS_19711             | TATAGCCAGAAGTAAAGAAGTCT  |
| PLK1                    | NM_005030    | shRNA           | 3        | v2HS_19709             | TATTCTGTACAATTCATATGGT   |
| PLK1                    | NM_005030    | shRNA           | 4        | v2HS_241437            | TTGCGGAAATTTAAGGAGGG     |
| PSMB5                   | NM_002797    | shRNA           | 1        | v2HS_170736            | TATAAATAGGATGGAGGATGGG   |
| PSMA5                   | NM_002790    | shRNA           | 1        | v2HS_221829            | TTCTCTTCTCCACAGCTAGGCA   |
| PSMB6                   | NM_002798    | shRNA           | 1        | v2HS_277575            | AACACATCTCCTTAAAGAGGCT   |
| KRAS                    | NM_033360    | shRNA           | 1        | v2HS_178283            | AAGAATCATCATCAGGAAGCCC   |
| KRAS                    | NM_033360    | shRNA           | 2        | v2HS_203252            | TAGTAGCATGTAATATAGCCC    |
| KRAS                    | NM_033360    | shRNA           | 3        | v2HS_169384            | TTTCTACTAGGACCATAGGCA    |
| KRAS                    | NM_033360    | shRNA           | 4        | v2HS_275818            | TTAGTGATTAGGTCAAATCCCT   |
| LUC (luciferase)        | N/A          | siRNA           | LUC      | N/A                    | CGUACGCGGAUACUUCGA       |
| PLK1                    | NM_005030    | siRNA           | 1        | Dhmarcon #D-0032960-05 | CAACCAAAGUCGAAUUAUUAU    |
| PLK1                    | NM_005030    | siRNA           | 2        | Dhmarcon #D-0032960-06 | CAAGAAGAAUGAAUACAGUUU    |
| PLK1                    | NM_005030    | siRNA           | 3        | Dhmarcon #D-0032960-07 | GAAGAUGUCCAUGGAAUUAU     |
| PLK1                    | NM_005030    | siRNA           | 4        | Dhmarcon #D-0032960-08 | CAACACGCCUCAUCCUCAUU     |
| ANAPC1                  | NM_022662    | siRNA           | siGneome | Dhmarcon #D-013843     | Mix of 4 siRNA sequences |
| ANAPC4                  | NM_013367    | siRNA           | siGneome | Dhmarcon #D-013642     | Mix of 4 siRNA sequences |
| CDC16                   | NM_003903    | siRNA           | siGneome | Dhmarcon #D-003223     | Mix of 4 siRNA sequences |
| CDC27                   | NM_001256    | siRNA           | siGneome | Dhmarcon #D-001256     | Mix of 4 siRNA sequences |
